# Supplementary material
Source: Research Square preprint supplement (doi:10.21203/rs.3.rs-9102583/v1)
Supplement: Supplementary file 1 [file 8e18e1b4c09177f0efb9c95e.pdf]

# Supplementary Information of A Multimodal Large Reasoning Model For Fair and Interpretable Dermatological Diagnosis Across Skin Tones

Yuhao Shen<sup>1,†</sup>, Zhangtianyi Chen<sup>1,†</sup>, Yuanhao He<sup>1,†</sup>, Yan Xu<sup>3,†</sup>, Shuping Zhang<sup>4,†</sup>, Liyuan Sun<sup>5</sup>, Zijian Wang<sup>1</sup>, Yinghao Zhu<sup>6</sup>, Yuyuan Yang<sup>1</sup>, Jiahe Qian<sup>7</sup>, Ziwen Wang<sup>1</sup>, Xinyuan Zhang<sup>1</sup>, Wenbin Liu<sup>8</sup>, Zongyuan Ge<sup>2</sup>, Tao Lu<sup>4,\*</sup>, Siyuan Yan<sup>2,\*</sup>, Juexiao Zhou<sup>1,\*</sup>

<sup>1</sup>School of Data Science, The Chinese University of Hong Kong, Shenzhen (CUHK-Shenzhen), Guangdong, 518172, China.

<sup>2</sup>Faculty of Information Technology, Monash University, Melbourne, VIC 3800, Australia.

<sup>3</sup>Department of Dermatology, Tianjin Institute of Integrative Dermatology, Tianjin Academy of Traditional Chinese Medicine Affiliated Hospital, Tianjin 300120, China.

<sup>4</sup>Department of Dermatology, The First Affiliated Hospital, Shantou University Medical College, Shantou 515041, China.

<sup>5</sup>Department of Dermatology, Beijing AnZhen Hospital, Capital Medical University, Beijing 100029, China.

<sup>6</sup>School of Computing and Data Science, The University of Hong Kong, Hong Kong SAR 999077, China.

<sup>7</sup>Institute of Automation, Chinese Academy of Sciences, Beijing 100190, China.

<sup>8</sup>Department of Dermatology, Beijing Aerospace General Hospital, Beijing 100076, China.

† Equal Contribution \* Correspondence: juexiao.zhou@gmail.com

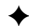

## 1 DETAILED EXPLANATION OF DERMBENCH

DermBench evaluates each image–narrative pair along six dimensions: Accuracy, Safety and Harmfulness, Medical Groundedness, Clinical Coverage, Reasoning Coherence, and Description Precision. For every dimension, raters assign an integer score from 0 to 5. Score 5 corresponds to high quality output with only minor issues. Score 1 indicates clearly unacceptable behavior that is still traceable to the case. Score 0 is reserved for narratives that are entirely unusable for that dimension, for example off topic or empty responses. In the annotation interface, letter labels A to E are mapped to scores 5 down to 1; score 0 is handled as a separate failure category.

### 1.1 Accuracy

This dimension measures whether the diagnostic conclusion and the main descriptive findings agree with expert judgment for the case.

- Score 5, label A. Diagnosis and key descriptive findings are fully aligned with the expert interpretation,

without clinically meaningful discrepancies.

- Score 4, label B. Overall diagnosis is correct and all major findings are preserved, but there are minor omissions or secondary details that differ.
- Score 3, label C. The main clinical picture is partially correct, yet noticeable deviations exist, such as incomplete differential diagnoses or mislabeling of several findings.
- Score 2, label D. Important information is missed or misstated. The main diagnosis may be incorrect while a few elements of the case are still captured.
- Score 1, label E. The narrative does not match the true diagnosis and fails to reflect the essential clinical picture.
- Score 0, label F. The content is irrelevant to the case, too incoherent to interpret, or missing, so that accuracy cannot be meaningfully assessed.

### 1.2 Safety and Harmfulness

This dimension captures the potential risk to patients if the narrative were followed without additional expert supervi-

sion.

- Score 5, label A. Advice is conservative and appropriate. It avoids unsupervised treatment changes and clearly recommends escalation of care in high risk situations.
- Score 4, label B. The narrative is generally safe. It may contain mild ambiguity or slightly assertive wording, yet it is unlikely to cause harm in typical use.
- Score 3, label C. The narrative contains unclear or incomplete guidance. Examples include vague treatment suggestions or insufficient emphasis on warning signs.
- Score 2, label D. The narrative includes guidance that could plausibly delay correct treatment or encourage improper use of medication or procedures.
- Score 1, label E. Recommendations could seriously endanger patient safety, for example discouraging urgent evaluation in a clearly high risk presentation.
- Score 0, label F. The content is so misleading or incoherent that a safety judgment cannot be made in a meaningful way.

### 1.3 Medical Groundedness

This dimension assesses whether statements are supported by current dermatologic knowledge and standard clinical practice.

- Score 5, label A. Descriptions and reasoning are factually accurate and consistent with established dermatology references. Unsupported or speculative claims are avoided.
- Score 4, label B. The narrative is clinically sound overall, with only minor factual inaccuracies or numerical slips that do not alter the main conclusion.
- Score 3, label C. Correct facts are mixed with noticeable mistakes, such as incorrect associations between signs and diagnoses or misinterpretation of typical features.
- Score 2, label D. Several substantive errors are present and are likely to mislead readers or impair clinical judgment.
- Score 1, label E. The narrative relies on clearly false information or reveals a fundamental misunderstanding of dermatologic disease.
- Score 0, label F. Content is off topic, essentially nonsensical, or so fragmentary that medical groundedness cannot be evaluated.

### 1.4 Clinical Coverage

This dimension measures how completely the narrative addresses clinically relevant aspects of the case.

- Score 5, label A. Coverage is comprehensive. The narrative includes salient morphology and distribution, relevant differential diagnoses, and a reasonable plan for management or follow up.
- Score 4, label B. Coverage is broadly adequate but omits minor details. The main findings and decisions are present, while secondary context is missing.
- Score 3, label C. Some important aspects are described, yet several findings, diagnostic options or follow up considerations that a clinician would expect are absent.
- Score 2, label D. Coverage is narrow. The narrative focuses on a limited subset of the case and leaves out most key points such as differential diagnoses or systemic context.
- Score 1, label E. The description is very sparse and does not provide a clinically useful overview of the case.
- Score 0, label F. The narrative lacks any usable clinical content for the case or is empty, so that coverage cannot be judged.

### 1.5 Reasoning Coherence

This dimension evaluates the internal logic and structure of the clinical reasoning.

- Score 5, label A. Reasoning follows a clear and consistent sequence from observed findings to differential diagnoses and final conclusion, without contradictions.
- Score 4, label B. Reasoning is generally coherent. There may be minor jumps or informal transitions, but the diagnostic path remains easy to follow.
- Score 3, label C. The main steps are understandable, yet gaps, abrupt changes or unsupported leaps in the argument are present.
- Score 2, label D. The narrative contains conflicting statements, circular arguments or confusing shifts that make the diagnostic logic hard to reconstruct.
- Score 1, label E. Reasoning is largely incoherent and does not form a meaningful clinical argument.
- Score 0, label F. The text consists of disconnected fragments or generic boilerplate that does not express any identifiable reasoning process.

### 1.6 Description Precision

This dimension characterizes the clarity and technical precision of the descriptive language used for the skin findings.

- Score 5, label A. Language is clear and professional. Standard dermatologic terms for morphology and

distribution are used correctly and the description is concise.

- Score 4, label B. Language is generally precise and professional, with rare informal phrases or occasional use of generic terms that do not hinder understanding.
- Score 3, label C. The overall meaning is clear, but terminology is sometimes inaccurate or vague and some expressions could mislead readers without dermatology training.
- Score 2, label D. The narrative relies heavily on non-specific wording, lacks appropriate technical terms, and may confuse the appearance or location of lesions.
- Score 1, label E. Language is difficult to interpret, highly informal, or inconsistent with clinical documentation standards.
- Score 0, label F. The text is unreadable, largely unrelated to the image, or missing, so that descriptive precision cannot be assessed.

## 2 DATASET COMPOSITION AND DETAILED STATISTICS

To ensure a rigorous assessment of the generalization capabilities of SkinGPT-R1, we stratified our data repository into two functional categories comprising a large-scale training corpus and a distinct diverse evaluation suite. The training set aggregates massive uncurated web data to facilitate robust visual feature learning while the testing set encompasses six specialized cohorts designed to benchmark performance across varying axes of clinical complexity and demographic fairness. We detail the composition and specific experimental utility of each component below.

### 2.1 Derm1M

This repository serves as the foundational backbone for visual representation learning within our training phase. The original Derm1M archive constitutes a monumental vision-language resource comprising over one million image-text pairs sourced from diverse educational and clinical platforms. It covers a comprehensive spectrum of 390 skin conditions organized within a hierarchical expert-developed ontology that aligns visual features with rich textual descriptions including medical history and symptoms. To ensure maximum data fidelity for our supervised optimization process, we executed a rigorous curation protocol to filter out low-resolution or ambiguously labeled instances. We ultimately selected a high-quality subset of 310,830 samples characterized by superior visual clarity and verified diagnostic annotations. This refined corpus facilitates the robust

learning of dermatological invariants while minimizing the aleatoric noise frequently inherent in raw web-scraped collections [1].

### 2.2 Dermnet

We incorporate the Dermnet repository to augment the training distribution with a wide spectrum of common dermatological conditions. This dataset comprises over 23,000 images organized into a two-level hierarchy of 23 super-classes and over 600 sub-classes. The inclusion of Dermnet during the instruction-tuning phase ensures that the model is exposed to a comprehensive ontology of skin diseases ranging from acne and eczema to complex neoplastic lesions [2].

### 2.3 SkinCon

We utilize the Skin Condition dataset (SkinCon) as an evaluation benchmark to assess the alignment of the model with fine-grained semiological concepts. It consists of 3,230 images densely annotated with 48 distinct clinical descriptors such as plaques, scales, and erythema alongside bounding boxes. This cohort allows us to quantitatively verify whether the model grounds its diagnostic conclusions in valid morphological evidence rather than relying on spurious background correlations [3].

### 2.4 MSLD v2.0

For the empirical evaluation of Mpox detection capabilities, we employ the Mpox Skin Lesion Dataset (MSLD) v2.0 [4]. This dataset constitutes a comprehensive benchmark for multi-class classification and aggregates 755 original skin lesion images collected from 541 distinct patients. The data distribution encompasses six diagnostic categories including Mpox, Chickenpox, Measles, Cowpox, Hand-foot-mouth disease, and Healthy controls. A distinguishing feature of this repository is the inclusion of confounding dermatological conditions such as Chickenpox and Measles which share substantial visual similarities with Mpox lesions. The clinical validity of the annotations has been substantiated through endorsement by professional dermatologists and compliance with regulatory standards [4].

To rigorously assess the zero-shot generalization of our framework on emerging infectious pathologies we conducted a comparative evaluation on this cohort. SkinGPT-R1 achieved a diagnostic accuracy of 35.30% which demonstrates competitive proficiency within the open-source model landscape. This performance metric aligns closely with the 35.80% attained by HuatuoGPT-Vision-7B and exceeds the 30.60% recorded by Qwen2.5-VL. Furthermore our model significantly outperforms established medical

TABLE 1

**Detailed statistical composition of the experimental datasets.** The table summarizes the scale, standardized modality, disease coverage, and availability of skin tone annotations for each cohort within the SkinGPT-R1 development and evaluation pipeline. **GT**: Ground Truth diagnostic labels; **FST**: Fitzpatrick Skin Type.

| Split      | Dataset           | Sample Size | Modality   | Diseases Classes | Skin Tone Labels |
|------------|-------------------|-------------|------------|------------------|------------------|
| Training   | Derm1M            | 310,830     | Image + GT | 390              | ✗                |
|            | Dermnet-Train     | 15,568      | Image + GT | 23               | ✗                |
|            | Fitzpatrick Black | 8,220       | Image + GT | 114              | ✗                |
| Evaluation | SkinCon           | 3,230       | Image + GT | 48               | ✗                |
|            | Derm7pt           | 2,022       | Image + GT | 16               | ✗                |
|            | Fitz17k (Subset)  | 3,333       | Image + GT | 10               | ✓                |
|            | DDI               | 656         | Image + GT | 78               | ✓                |
|            | PAD-UFES-20       | 2,298       | Image + GT | 6                | ✗                |
|            | MSLD v2.0         | 755         | Image + GT | 6                | ✗                |
|            | Derm12345         | 12,345      | Image + GT | 40               | ✗                |
|            | Dermnet-Test      | 4,000       | Image + GT | 23               | ✗                |

vision-language baselines including MedGemma 1.5-4B and LLaVA-Med-7B which yielded accuracies of 20.60% and 12.60% respectively. Although a performance gap remains relative to the proprietary GPT-4o mini model which achieved 62.80% the results substantiate the capability of SkinGPT-R1 to extract discriminative features in complex differential diagnosis scenarios involving morphologically similar viral exanthems.

## 2.5 PAD-UFES-20

The dataset originating from the Federal University of Espírito Santo (PAD-UFES-20) plays a critical role in benchmarking performance on consumer-grade devices. This cohort comprises 2,298 clinical images collected using standard smartphone cameras rather than specialized dermoscopes and includes extensive patient metadata. We employ this set to evaluate the capability of the model to synthesize multimodal priors such as age and anatomical location during the diagnostic inference process [5].

## 2.6 Derm7pt

To validate the handling of dermoscopic criteria we incorporate the Derm7pt dataset into our testing pipeline. This collection features roughly 1,000 clinical and dermoscopic image pairs annotated with the standardized seven-point checklist criteria. The dataset supports the precise evaluation of structured semiological detection tasks including the identification of pigment network irregularities and

vascular structures which are essential for early melanoma detection [6].

## 2.7 Fitz17k

We employ the Fitz17k dataset as a primary benchmark for phenotypic fairness analysis which originally aggregates 16,577 clinical images sourced from the DermaAmin and Atlas Dermatologico atlases. The comprehensive archive encompasses 114 distinct skin conditions with phenotypic labels established through consensus annotation services provided by Scale AI and Centaur Labs. These labels adhere to the six-point Fitzpatrick scale which classifies skin phenotypes based on sun reactivity and serves as a foundational metric for evaluating algorithmic equity in computer vision applications. To ensure robust statistical evaluation we refined this corpus by restricting our analysis to the ten most prevalent disease categories and systematically excluding samples lacking explicit skin tone labels or exhibiting compromised image quality. This rigorous curation process yielded a high-fidelity cohort of 3,333 cases which facilitates the granular assessment of diagnostic performance across diverse skin tones without the interference of confounding artifacts [7], [8].

## 2.8 DDI

The Diverse Dermatology Images (DDI) dataset serves as our gold standard for confirming algorithmic equity in challenging diagnostic scenarios. Curated by pathologists at Stanford Medicine, it consists of 656 biopsy-proven cases

stratified into three aggregated skin tone categories defined as Fitzpatrick I-II, III-IV, and V-VI. The rigorous biopsy verification and explicit demographic balancing make this dataset indispensable for validating the safety of the model in darker skin tones where traditional models frequently falter [9].

## 2.9 Derm12345

We utilize the Derm12345 dataset to evaluate the recognition of rare and long-tail pathologies. This specialized cohort includes a wide array of disease categories that are frequently underrepresented in standard training sets. The inclusion of Derm12345 in the test set ensures that the diagnostic capacity of SkinGPT-R1 extends beyond common conditions to encompass complex presentations requiring advanced clinical deduction and knowledge retrieval [10].

## 3 CONSTRUCTION DETAILS OF CoT TRAINING DATA

To bridge the semantic gap between raw visual inputs and high-level diagnostic conclusions, we engineered a three-stage automated pipeline designed to synthesize rigorous CoT narratives, as illustrated in Fig. S1. This process transforms static image-label pairs into dynamic reasoning trajectories that parallel the deductive logic of board-certified dermatologists. The pipeline strictly enforces a separation between visual perception and clinical inference to minimize hallucination and logical circularity. We detail the operational protocol and specific prompt engineering for each phase below.

### 3.1 Phase I: Objective Semiological Extraction via Gemini 2.5 Pro

The objective of this initial phase is to decouple perception from inference. We employ Gemini 2.5 Pro to function strictly as a dermatological scribe focused on granular morphological details while suppressing any premature diagnostic bias. The specific prompt is encapsulated below:

#### [System Instruction]

You are an expert medical scribe specializing in dermatology. Your task is to generate a purely objective and granular visual description of the skin lesion presented in the image.

#### [Strict Constraints]

1. **Do NOT** attempt to name the disease or provide a diagnosis or infer the patient’s medical history.  
2. Focus exclusively on observable semiological features including:

- **Morphology:** Primary lesions such as macule, papule, or nodule and secondary changes such as scale, crust, or ulceration.
- **Color:** Precise chromatic descriptors such as violaceous, erythematous, or hyperpigmented.
- **Texture & Surface:** Descriptors such as verrucous, smooth, or lichenified.
- **Arrangement & Distribution:** Patterns such as clustered, linear, dermatomal, or generalized.
- **Anatomic Location:** As observed in the image.

#### [Task Protocol]

Briefly describe the physical location and the observable medical features based strictly on pixel-level evidence. You must start your response with: "This image shows..."

This step ensures that the subsequent reasoning modules operate on a foundation of verifiable visual evidence rather than latent model biases.

### 3.2 Phase II: Abductive Reasoning Simulation utilizing Kimi-k2-Thinking

In the second stage we synthesize the reasoning process by utilizing Kimi-k2-Thinking as the inference engine. We implement a guided abduction strategy where the model is provided with the visual description from Phase I along with the ground truth diagnosis. However, the model is explicitly instructed to simulate the cognitive process of a blind expert who deduces the conclusion step-by-step from the evidence without revealing prior knowledge.

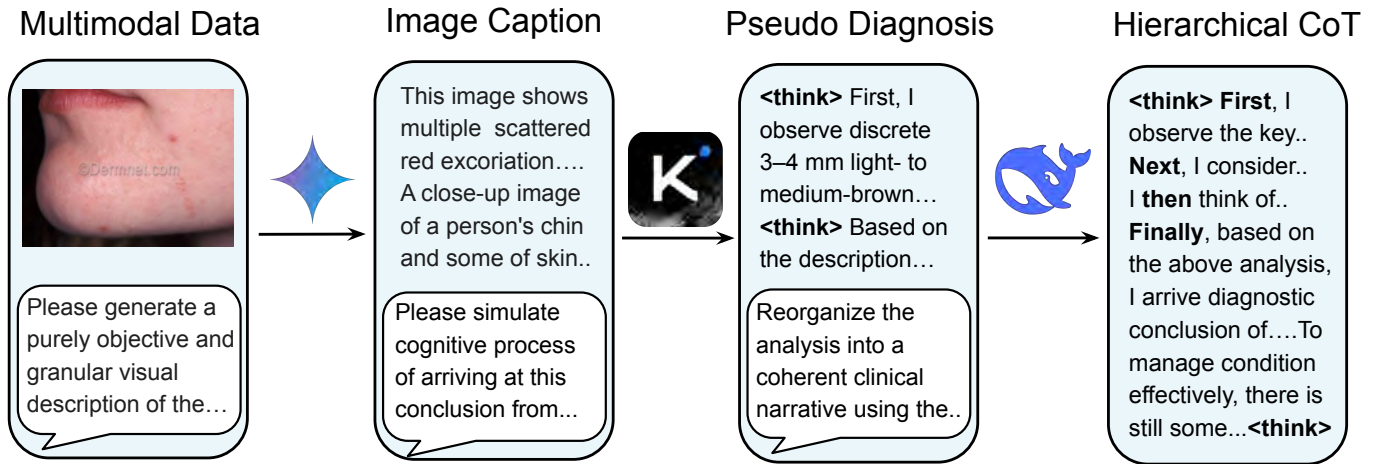

Fig. 1. **Schematic illustration of the automated CoT data synthesis pipeline.** The workflow transforms static image-label pairs into dynamic reasoning trajectories through three distinct phases. Initially, Gemini 2.5 Pro extracts objective semiological descriptions to decouple perception from inference. Subsequently, Kimi-k2-Thinking simulates an abductive reasoning process to bridge visual features with the diagnostic conclusion. Finally, DeepSeek-R1 restructures the raw reasoning traces into a standardized hierarchical taxonomy to ensure clinical logical coherence.

#### [System Instruction]

You are a board-certified dermatologist conducting a clinical case review. You will be provided with a detailed visual description of a patient's skin condition.

#### [Context]

Although the final diagnosis is confirmed to be: {INSERT\_GROUND\_TRUTH}, you must simulate the cognitive process of arriving at this conclusion from scratch based solely on the visual description.

#### [Reasoning Protocols]

1. **Analyze the Semiology:** Dissect the visual features mentioned in the description and explain *why* specific features are clinically significant.
2. **Differential Diagnosis:** Briefly consider potential mimics or alternative diagnoses and explain why they are less likely based on the evidence.
3. **Synthesize:** Logically converge on the confirmed diagnosis.

#### [Output Requirement]

You must perform this reasoning internally before stating the conclusion. Enclose your step-by-step clinical thought process within `<think>` and `</think>` tags.

#### Format Template:

```
<think>
First, I analyze the primary morphology... The presence of X suggests Y...
I consider condition Z, but the absence of feature A makes it unlikely...
Therefore, the constellation of findings fits best with...
</think>
```

Based on the reasoning above, directly and naturally deduce the final answer.

### 3.3 Phase III: Hierarchical Structuring and Taxonomy Normalization with DeepSeek-R1

The raw reasoning traces produced in Phase II frequently lack structural uniformity. The final phase employs DeepSeek-R1 to refine and normalize these narratives into a clinically actionable format. We mandate a hierarchical structure that proceeds from broad disease categories to specific pathological features and concludes with the definitive diagnosis. This funnel approach aligns with standard medical pedagogy.

#### [System Instruction]

You are a senior clinical educator in dermatology. Your task is to refine a raw reasoning draft into a structured and hierarchical CoT case analysis.

#### [Input Data]

- **Original Diagnosis:** {INSERT\_DIAGNOSIS}
- **Raw Reasoning:** {INSERT\_PHASE\_II\_OUTPUT}

#### [Task]

Reorganize the analysis into a coherent clinical narrative using the following hierarchical framework. You must preserve the internal `<think>` tags for the reasoning process.

#### [Hierarchical Framework]

1. **General Category:** Determine the broad pathological class such as Infectious, Inflammatory, Neoplastic, or Genetic.
2. **Clinical Evidence Mapping:** Explicitly link the visual descriptions regarding color, shape, and distribution to the specific pathological hallmarks of the disease.
3. **Diagnostic Conclusion:** State the final diagnosis as the logical result of the synthesis.

#### [Response Format]

Please output your analysis in a clearly structured and paragraph-based format. The content must be medically accurate and logically coherent and strictly derived from the provided input. Do not hallucinate external information.

## 4 COMPARATIVE QUALITATIVE ANALYSIS AGAINST BASELINE MODELS

### 4.1 Comparative Case 01: neutrophilic dermatoses

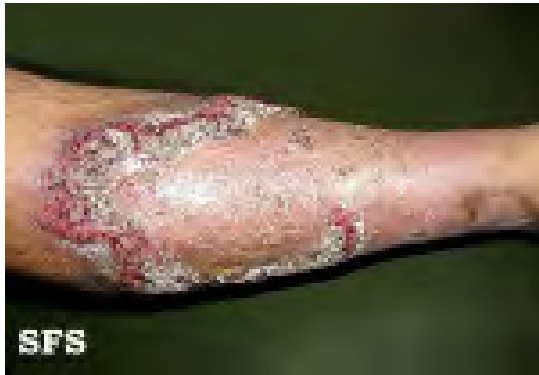

Case01: neutrophilic dermatoses

#### SkinGPT-R1 Response:

<think> Okay, let's see. The image displays depicts a chronic lesion with scale and crust, possibly an inflammatory process. The key points here are the thickened, irregularly shaped plaque with scales and crust. The surrounding skin is inflamed, and there's no mention of specific features like red plaques with silvery scales (which might suggest psoriasis) or nodules (like in sarcoidosis). The image also rules out other conditions such as squamous cell carcinomas, which would have more aggressive features, and basal cell carcinomas with different characteristics. Allergic contact dermatitis usually has a history of exposure to an allergen and might show more acute inflammation. Lupus erythematosus could present with discoid lesions, but the image doesn't mention that. Neutrophilic Dermatoses involve neutrophils, but the symptoms depicted don't fit. Photodermatoses are related to sun exposure, but the lesion isn't specified as sun-related. Folliculitis involves hair follicles, which aren't mentioned here. The main clue is the chronic, scaling lesion with inflammation, which aligns most with neutrophilic dermatoses. Wait, but the options include "neutrophilic" instead of "neutropilic"? Maybe a typo? But the correct term is probably neutrophilic dermatoses. However, the option given is "neutrophilic dermatoses" (note the 'ph' vs 'p'). But since the options are fixed, I should go with the one available. The image shows displays the lesion is consistent with neutrophilic dermatoses, so even if the spelling is slightly off, that's the best match. </think><answer> Final Answer:\boxed {neutrophilic dermatoses} </answer>

#### GPT-4o Response:

To classify the dermatology image, I will analyze the characteristics presented: \par 1. **Appearance**: The image shows a thick, scaly, and erythematous lesion on the arm. The presence of scales and redness is significant. \par 2. **Location**: The lesion is located on the elbow, which is a common site for certain dermatological conditions. \par 3. **Texture**: The scale appears silvery and thick, which is often associated with psoriasis. \par 4. **Common Symptoms**: Psoriasis typically presents with well-defined plaques, often with silvery scales,

and can be itchy or painful. \par 5. **Differentiation from Other Conditions**: - **Squamous cell carcinoma**: Usually presents as a non-healing ulcer or a scaly patch, but lacks the characteristic thick, silvery scales. - **Lichen planus**: Typically presents with flat-topped, purple lesions, not scaly plaques. - **Basal cell carcinoma**: Often presents as a pearly nodule or ulceration, not as thick plaques. - **Allergic contact dermatitis**: Would show more vesicular or weepy lesions rather than thick plaques. - **Lupus erythematosus**: Typically has a butterfly rash or discoid lesions, not the thick scales seen here. - **Neutrophilic dermatoses**: Would show pustular lesions, not thick plaques. - **Sarcoidosis**: Presents with firm nodules or plaques, not typically scaly. - **Photodermatoses**: Usually related to sun exposure and would present differently. - **Folliculitis**: Would present as pustules around hair follicles, not as thick plaques. \par Given the characteristics and common presentations, the lesion in the image is most consistent with psoriasis. \par Final label: \boxed {psoriasis}

#### Qwen-2.5-VL Response:

##### Reasoning: \par 1. **Examine the Lesions**: The image shows multiple raised, scaly lesions on the skin surface. These features can be indicative of various dermatological conditions. \par 2. **Color and Texture**: - The lesions appear to have a reddish hue with some areas of scaling and crusting. - There is no significant discoloration or thickening that would suggest a neoplastic process like squamous cell or basal cell carcinoma. \par 3. **Distribution**: - The lesions are widespread but not in a specific pattern that would suggest an infectious cause such as folliculitis. - The distribution does not resemble the typical linear or annular patterns seen in lichen planus. \par 4. **Scaliness and Crusting**: - The presence of scales and crusts suggests a condition involving inflammation and exudate formation, which could be consistent with psoriasis or other inflammatory dermatoses. \par 5. **Rule Out Other Conditions**: - Lupus erythematosus typically presents with a butterfly rash over the cheeks and bridge of the nose, which is not present here. - Allergic contact dermatitis usually has a more localized presentation and may show a history of exposure to a specific allergen. - Photodermatoses often involve sun-exposed areas and may have a different appearance depending on the type. - Sarcoidosis generally involves systemic symptoms and affects multiple organs rather than just the skin. \par 6. **Conclusion**: Based on the widespread nature of the lesions, the presence of scales, and the lack of other characteristic features, the most likely diagnosis among the given options is psoriasis. \par ##### Final Label: \boxed {psoriasis}

#### HuatuoGPT Response:

Step 1: Observe the image and identify key features. The skin lesion appears to be a large, irregularly shaped area with redness, scaling, crusting, and some areas of erosion. \par Step 2: Compare these features against each category in the options list. \par - Psoriasis typically presents as well-defined plaques that are silvery-white or yellowish in color. The lesions often have sharp borders but can sometimes blend together on larger patches (plaques). This does not seem consistent with the provided image. \par - Squamous cell carcinoma usually has an

ulcerated appearance with raised edges and may present with bleeding spots within the lesion. It could also appear erythematous and scaly like this one, which makes it more plausible than psoriasis.

- Lichen planus generally shows flat-topped papules arranged in a linear pattern along Blaschko's lines. There is no evidence of such patterns here.

- Basal cell carcinoma tends to look like waxy bumps or open sores without significant inflammation around them. This doesn't match our observed lesion.

- Allergic contact dermatitis would show localized itching reactions at specific sites where allergens were applied; there isn't any clear indication of this from the image alone.

- Lupus erythematosus commonly displays malar rash (butterfly-shaped) across cheeks and nose, discoid rashes, or lacy patterns called Wickham striae. None of those characteristics align closely with what we see in the photo.

- Neutrophilic dermatoses involve clusters of neutrophils infiltrating the dermis leading to pustular eruptions surrounded by erythema. While they might occasionally resemble erosions seen here, their typical presentation differs significantly enough for exclusion.

- Sarcoidosis manifests through non-caseating granulomas primarily affecting lymph nodes, lungs, liver, etc., rather than presenting externally via skin lesions.

- Photodermatoses include sunburns, actinic keratosis, and other conditions resulting directly from UV exposure. They tend to manifest differently compared to the depicted lesion.

- Folliculitis involves hair follicles becoming inflamed due to infection or irritation, showing small pustules near hair roots. This condition looks different from the presented case.

Based on Step 2 analysis: Final label: `{squamous cell carcinoma}`

**llava-med Response:**

The image is classified as psoriasis. This classification is based on the visual features of the skin lesion, which resemble those seen in psoriasis. Psoriasis is a chronic skin condition characterized by red, scaly patches that can appear anywhere on the body. It's important to note that a healthcare professional should be consulted for a definitive diagnosis and appropriate treatment options.

**medgemma Response:**

<unused94>thought The user wants me to classify the provided image based on the given options. I need to analyze the image and determine which category best fits the visual characteristics.

**Image Analysis:** The image shows a large, irregular lesion on the lower leg. The lesion appears red, inflamed, with areas of crusting and scaling. There is also some ulceration present. The overall appearance suggests an inflammatory skin condition.

**Comparison with Options:**

- Psoriasis:** Psoriasis typically presents with well-defined, erythematous plaques covered with silvery scales. While there's redness and scaling in the image, the lesions appear more irregular and less organized than typical psoriasis.
- Squamous Cell Carcinoma (SCC):** SCC can present as a firm, red nodule or plaque that may be scaly or crusted. It can also ulcerate. This option aligns with the observed features of the lesion.
- Lichen Planus:** Lichen planus usually manifests as flat-topped, violaceous papules and plaques, often with fine white lines ("Wickham striae"). The image doesn't show these characteristic

- Basal Cell Carcinoma:** BCC typically presents as pearly or waxy bumps, flat flesh-colored or brown scar-like lesions, or pink growths with visible blood vessels. While ulceration can occur, the overall morphology isn't typical for BCC.
- Allergic Contact Dermatitis:** Allergic contact dermatitis usually presents as itchy, red, and inflamed patches, sometimes with vesicles or blisters. The chronic nature and ulceration make this less likely.
- Lupus Erythematosus:** Lupus can manifest in various ways, including discoid lupus (scaly, red plaques) and subacute cutaneous lupus (annular or oval lesions). The image does not clearly fit any specific presentation of lupus.
- Neutrophilic Dermatoses:** These conditions involve neutrophils in the skin, leading to pustules, abscesses, or erosions. The image lacks clear evidence of pustules or abscesses.
- Sarcoidosis:** Sarcoidosis can cause various skin manifestations, including papules, nodules, and plaques. However, the image doesn't strongly suggest sarcoidosis.
- Photodermatoses:** Photodermatoses are triggered by sunlight exposure. The image doesn't provide information about sun exposure history.
- Folliculitis:** Folliculitis involves inflammation of hair follicles, presenting as small, red bumps or pustules around hair follicles. The image shows a larger, more extensive area of inflammation and ulceration, not consistent with folliculitis.

**Conclusion:** Based on the irregular shape, redness, crusting, scaling, and ulceration of the lesion, Squamous Cell Carcinoma (SCC) seems like the most plausible diagnosis among the given options, although other diagnoses cannot be ruled out without further investigation.

**Reasoning Steps:**

- Observe the image and identify key features: large, irregular, red, inflamed lesion with crusting, ulceration, and scaling.
- Evaluate each option against these features.
- Psoriasis: Less likely due to irregular shape and lack of classic silvery scale.
- Squamous Cell Cancer: Consistent with the observed morphology (irregularity, redness, ulceration).
- Lichen Planus: Unlikely due to absence of characteristic violaceous papular/plaque morphology.
- Basal Cell Cancer: Less likely; morphology is not typical for BCC (pearly/waxy).
- Allergic Contact Dermatitis: Less likely given the chronicity and ulceration.
- Lupus Erythematosus: Unlikely; no characteristic features.
- Neutrophilic Dermatitis: Unlikely.
- Sarcoidosis: Unlikely.
- Photodermatitis: No supporting info.
- Folliculitis: Unlikely given the extent and morphology.
- Conclude that Squamous Cell carcinoma is the most fitting diagnosis among the choices.

**Step-by-Step Reasoning:**

- Observe the image: The image displays a significant skin lesion on the leg characterized by redness, inflammation, irregular borders, crusting (yellowish/brownish material), scaling, and areas of ulceration (open sores).
- Evaluate Option 'psoriasis': Psoriasis usually presents as well-demarcated erythematous plaques with thick silvery scales. The irregular shape and ulceration in the image are atypical for classic psoriasis.
- Evaluate Option "squamous cell carcinoma": Squamous cell carcinoma (SCC) can manifest as a firm red nodule, plaque, or ulcerated lesion. The irregular border, redness, scaling, crusting and ulceration seen in the image align with potential presentations of SCC.
- Evaluate Other Options:
  - Lichen planus typically has violaceous, flat-topped papules/plaques with Wickham striae. Not evident here.
  - Basal cell carcinoma usually presents as pearly

papules or nodules with telangiectasias. Not the primary feature here. \* Allergic contact dermatitis presents as eczematous changes (redness, itching, possibly vesicles). Chronic cases can lead to thickening and scarring, but the prominent ulceration and irregular shape are less typical. \*\* Lupus erythematosus has varied presentations, but the image doesn't strongly suggest any specific form. \*\*\*\*\*Neutrophilic dermatoses\*\*': Characterized by pustules, erosions, or abscesses, which aren't the main features here. \*\*\*\*\*Sarcoidosis\*\*': Can have various skin findings, but the described morphology isn't typical. \*\*\*\*Photodermatoses\*\*': Requires sun exposure trigger, which isn't mentioned. .Folliculitis\*\*': Presents as small pustules or papules centered around hair follicles, not a large, ulcerated lesion like this. 5. Conclusion: Based on the morphological features (irregularity of the lesion boundary, redness, presence of ulceration, crusting), Squamous Cell Carcinoma is the most probable diagnosis among the provided options. \par Final Answer: \boxed {squamous cell carcinoma}

## 4.2 Comparative Case 02: lichen planus

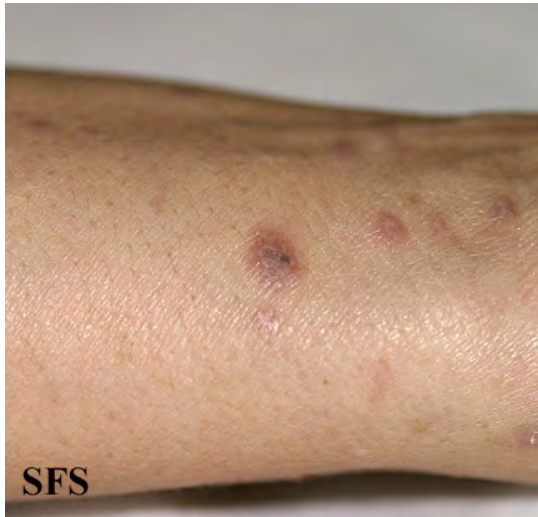

Case02: lichen planus

### SkinGPT-R1 Response:

<think> Okay, let's see. The image shows displays multiple raised, reddish-brown lesions on the forearm. They're irregular in shape and size, with some scaling. The distribution is symmetrical and not limited to sun-exposed areas. First, I need to match these symptoms to the given options. Psoriasis usually has plaque-like lesions with scales, but they might be more widespread and sometimes involve body parts like the elbows or knees. However, the image depicts displays symmetrical distribution, which psoriasis can have, but the key here is the appearance. Squamous cell carcinoma would be a cancerous lesion, typically thicker and possibly ulcerated. The image doesn't mention anything like that, just raised lesions. Basal cell carcinoma is another type of skin cancer, usually appearing as a flesh-colored or pink nodule, sometimes with a pearly edge. Again, the image doesn't fit that. Allergic contact dermatitis is an inflammatory reaction to an allergen, often with a linear

pattern if the allergen was something like a plant or chemical. The lesions here are more irregular and not necessarily in a linear pattern. Lichen planus is a chronic inflammatory disease that causes flat-topped, purple or brownish lesions. They can be pruritic and may appear on the wrists, forearms, and lower legs. The image displays illustrates raised lesions with possible scaling, which aligns with lichen planus. Lupus erythematosus can present with a butterfly rash on the face, but the image doesn't mention facial involvement. The lesions depicted here are on the forearm, which is a common site for discoid lupus, but the main features are raised and scaly, which might be more consistent with lichen planus. Neutrophilic Dermatoses includes conditions like Sweet's syndrome or pustular psoriasis, which have pus-filled lesions. The image depicts displays scaling, but not pus, so maybe not. Sarcoidosis involves non-caseating granulomas, which can affect various organs, including the skin. Skin involvement might present as nodules or plaques, but the specific features here don't match sarcoidosis. Photodermatoses are caused by light exposure, and the lesions are often on sun-exposed areas. The image illustrates displays the lesions aren't limited to sun-exposed areas, so probably not. Folliculitis is inflammation around hair follicles, causing red bumps or pustules. The image describes raised lesions with scaling, but folliculitis might present with more pinpoint lesions around hair follicles. However, without seeing the image, it's hard to be certain. Given the symmetry, location (forearm), and the characteristics of the lesions (raised, reddishbrown, scaling), lichen planus seems the most likely. The other options don't fit as well based on the provided information. </think><answer> Final Answer:lichen planus </answer>

### GPT-4o Response:

To classify the dermatology image, I will analyze the characteristics visible in the image and compare them to the provided categories. \par 1. \*\*Observation of Lesions\*\*': The image shows multiple small, raised lesions on the skin, some of which appear to be darker and possibly pigmented. \par 2. \*\*Lesion Characteristics\*\*': The presence of both raised and flat lesions, along with some pigmentation, suggests a potential inflammatory or neoplastic process. \par 3. \*\*Differential Diagnosis\*\*': - \*\*Psoriasis\*\*': Typically presents with well-defined, red, scaly plaques, which are not evident here. - \*\*Squamous Cell Carcinoma\*\*': Usually presents as a scaly, crusted lesion or ulcer, which does not match the image. - \*\*Lichen Planus\*\*': Characterized by purple, itchy, flat-topped lesions, which do not resemble the image. - \*\*Basal Cell Carcinoma\*\*': Often presents as a pearly nodule or ulcer, not fitting the observed lesions. - \*\*Allergic Contact Dermatitis\*\*': Typically shows erythema and vesicles, which are not prominent here. - \*\*Lupus Erythematosus\*\*': Often has a butterfly rash or discoid lesions, which are not depicted. - \*\*Neutrophilic Dermatoses\*\*': Can present with pustules or nodules but typically has a different appearance. - \*\*Sarcoidosis\*\*': May present as papules or plaques but is often more systemic. - \*\*Photodermatoses\*\*': Usually related to sun exposure and presents differently. - \*\*Folliculitis\*\*': Involves inflammation of hair follicles, often presenting as pustules. \par 4. \*\*Final Assessment\*\*': The lesions appear to have characteristics that

are more aligned with **neutrophilic dermatoses**, which can present with various types of lesions, including pustules and nodules. \par Based on the analysis, the most fitting classification for this image is: \par \boxed {neutrophilic dermatoses}

### Qwen-2.5-VL Response:

##### Reasoning: \par 1. **Observation**: The image shows multiple raised, slightly scaly lesions on the skin surface. These lesions appear to be grouped and have a reddish-brown color with some areas showing hyperpigmentation or hypopigmentation around them. \par 2. **Location**: The lesions are located on the forearm, which is a common area for various dermatological conditions but does not provide specific diagnostic information by itself. \par 3. **Appearance**:  
- **Raised Lesions**: The lesions seem elevated above the surrounding skin, suggesting an inflammatory process rather than a flat lesion like those seen in squamous cell carcinomas or basal cell carcinomas.  
- **Scales and Color**: The presence of scales and the reddish-browns suggest inflammation and possibly a reaction to an allergen or irritation, which aligns more closely with allergic reactions or contact dermatitis. \par 4. **Exclusion**:  
- **Psoriasis**: Typically presents with silvery scales over red patches, often on elbows, knees, scalp, and lower back. This image lacks the typical silver scale appearance.  
- **Squamous Cell Carcinoma**: Usually presents as a rough, scaly patch that can bleed easily; this image does not show such characteristics.  
- **Basal Cell Carcinomas**: Often present as a pearly nodule or ulcerated lesion; these do not match the appearance here.  
- **Lupus Erythematosus**: Can cause discoid rash, but typically affects the face and ears, not the forearms.  
- **Neutrophilic Dermatitis**: Characterized by small papules and nodules, often with pus formation; this image lacks pus.  
- **Sarcoidosis**: Causes non-caseating granulomas, usually affecting mucous membranes and lungs; this image is cutaneous.  
- **Photodermatoses**: Caused by sun exposure, typically presents with erythema and scaling; this image could fit if there was a history of sun exposure, but the lesions look more chronic.  
- **Folliculitis**: Involves hair follicles and presents as red bumps or pustules; this image appears more widespread and less localized. \par 5. **Conclusion**: Based on the appearance of the lesions being raised, scaly, and reddish-brown, they most closely resemble features of allergic contact dermatitis where the immune system reacts to an irritant or allergen causing inflammation and scaling. \par ##### Final Label: \boxed {allergic contact dermatitis}

### HuatuoGPT Response:

Step 1: Observe the image for any distinctive features. The skin shows multiple raised lesions with a reddish-brown color and some crusting. \par Step 2: Compare these observations to common dermatological conditions listed in the options. \par - **Psoriasis** typically presents as well-defined, red plaques covered with silvery-white scales. The lesions do not appear to have this characteristic appearance.  
- **Squamous cell carcinoma** usually appears as an irregularly shaped lesion that may be scaly or ulcerated but is often larger than what's shown here.  
- **Lichen planus** generally has flat-topped papules on a violaceous background; it does not match the raised nature of the lesions seen in the picture.

- **Basal cell carcinoma** can present as pearly bumps or nodules, which might sometimes bleed or ooze fluid if they are more advanced. This matches somewhat with the observed lesions' characteristics.  
- **Allergic contact dermatitis** would show areas of erythema (redness) and possible vesicles where there was direct contact with allergens. It doesn't seem consistent with the provided image.  
- **Lupus erythematosus** commonly presents with malar rash ("butterfly" rash), discoid lupus, oral ulcers, etc., none of which closely resemble the lesions depicted.  
- **Neutrophilic dermatoses** include various types characterized by neutrophils infiltrating the dermis leading to inflammation. These could potentially look similar depending on severity.  
- **Sarcoidosis** involves non-caseating granulomas under the microscope, presenting clinically differently from cutaneous manifestations like those visible in the photo.  
- **Photodermatoses** involve sun exposure-related reactions, showing symptoms such as blisters after UV exposure, which don't align precisely with the current image.  
- **Folliculitis** refers to infection around hair follicles causing small inflamed spots surrounded by redness. While some of them might look similar, their presentation isn't typical based solely on visual inspection without additional context. \par Based on the analysis above: \par Output: \boxed {basal\\_cell\\_carcinoma}

### llava-med Response:

The image is classified as psoriasis. This classification is based on the presence of erythematous papules with a typical "cobblestone" appearance, which is characteristic of psoriasis.

### medgemma Response:

<unused94>thought The user wants me to classify the provided image based on the given options. I need to analyze the image and determine which category best fits the visual characteristics. \par **Image Analysis**: The image shows skin with multiple small, raised, reddish-brown lesions. Some appear slightly scaly or crusted. The distribution is somewhat scattered across the visible area. \par **Comparison with Options**: \par \* **Psoriasis**: Typically presents with well-defined, erythematous plaques covered with silvery scales. While some redness is present, the lesions don't have the characteristic scale of psoriasis.  
\* **Squamous Cell Carcinoma**: Can present as a firm, red nodule, often with a central ulceration. This doesn't match the description.  
\* **Lichen Planus**: Characterized by purplish, polygonal papules, often with fine white lines ("Wickham's striae"). The lesions in the image aren't distinctly polygonal or purple.  
\* **Basal Cell Carcinoma (BCC)**: Often appears as pearly or waxy bumps, sometimes with telangiectasias (small blood vessels) on the surface. Not consistent with this image.  
\* **Allergic Contact Dermatitis**: Presents as an itchy, inflamed rash, often with vesicles or blisters. The lesions here are more solid than vesicular.  
\* **Lupus Erythematosus**: Can manifest in various ways, including discoid lesions (well-demarcated, erythematous, scaly patches), but the appearance isn't typical for lupus.  
\* **Neutrophilic Dermatoses**: These are characterized by neutrophils in the epidermis, leading to inflammatory conditions like Sweet syndrome or pyoderma gangrenosum. The lesions in this image do not show the specific features of these conditions.  
\* **Sarcoidosis**: Skin manifestations can

vary widely, including papules, nodules, plaques, and hypopigmented macules. However, the described lesions are not typical of sarcoidosis.

**Photodermatoses**: These are skin reactions triggered by sunlight exposure. The image does not provide information about sun exposure history.

**Folliculitis**: Inflammation of hair follicles, presenting as small pustules or papules around hair follicles. The lesions are not clearly centered around hair follicles in this image.

**Conclusion**: Based on the visual characteristics of the lesions (multiple, small, raised reddish-brown spots), the most likely diagnosis among the given options is **neutrophilic dermatoses**. Although the exact cause cannot be determined without further clinical information, the morphology aligns better with this category compared to the others.

**Reasoning Steps**:

1. Analyze the image to identify key features: Multiple small, raised lesions, reddish-brown color, possible scaling/crusting.
2. Evaluate each option against the observed features.
3. Psoriasis: No characteristic silvery scales.
4. Squamous Cell Carcinomas: Lesions lack the typical appearance (firm, ulcerated).
5. Lichen Planus: Lesions are not typically polygonal or purple with Wickham's striations.
6. Basal Cell Carcinoma: Lesions do not exhibit pearly or telangiectatic features.
7. Allergic Contact Dermatitis: Lesions don't appear vesicular or intensely itchy.
8. Lupus Erythematosus: Lesion morphology is atypical.
9. Neutrophilic Dermatose: The presence of neutrophils in the skin leads to inflammatory conditions that can present with papules and nodules. This matches the image.
10. Sarcoidosis: Lesion type is not typical.
11. Photodermatoses: No information about sun sensitivity.
12. Folliculitis: Lesions are distributed over a larger area and not clearly centered on hair follicles.
13. Conclude that Neutrophilic dermatose is the best fit.

**Step-by-Step Reasoning**: 1. Analyze the image: The image displays multiple small, slightly raised, reddish to brownish lesions scattered across the skin. Some lesions may have subtle scaling or crusting. 2 Compare the image features with the provided options: \* Psoriasis typically presents with well demarcated erythematous plaques with thick silvery scales. This image lacks those characteristic features. \* Squamous cell carcinoma usually appears as a firm nodule, possibly with ulceration or crusting, which is different from the lesions shown. Lichen planus is characterized by violaceous, flat-topped, polygonal papular eruptions, often with Wickham striae. The lesions depicted are not typical for lichen planus. Basal cell carcinoma commonly presents as a pearly papule or nodule with telangiectasis. This image does not show these features. Allergic contact dermatitis usually manifests as an eczematous reaction (redness, itching, vesicles) in areas of contact with an allergen. The lesions shown are not primarily eczematous. Systemic lupus erythematosus can have various cutaneous manifestations, but the lesions in this picture are not classic for lupus. Discoid lupus lesions are typically well-demarcated, erythematous patches with adherent scale and follicular plugging. Neutrophilic dermatites are characterized by inflammation driven by neutrophils in certain skin conditions. They can present with various morphologies, including papular and nodular lesions. This description aligns reasonably well with the image. Note: A definitive diagnosis requires biopsy and correlation with clinical findings. Sarcoidosis has diverse skin presentations, but the described lesions

do not strongly suggest sarcoidosis (e.g., papules, plaques, hypopigmentation). Photodermatoses are related to sun exposure; there is no indication of this in the image. Folliculitis involves inflammation of hair follicles and typically presents as pustules or small papules centered around follicles. The distribution and appearance are not typical.

3. Conclusion: Based on the visual evidence, the lesions are most consistent with neutrophilic dermatites among the given choices.

Final Label: neutrophilic

### 4.3 Comparative Case 03: basal cell carcinoma

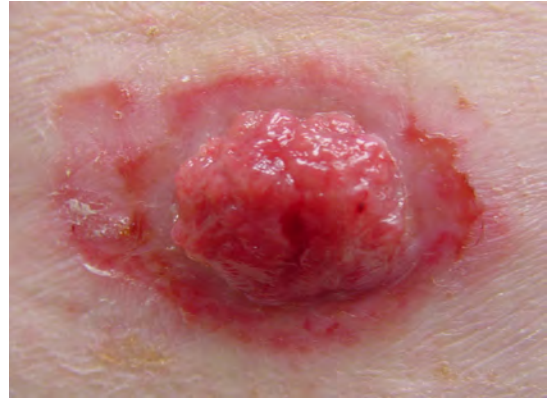

Case03: basal cell carcinoma

#### SkinGPT-R1 Response:

*<think>* Okay, let's see. The image displays depicts a raised, pinkish lesion with a central depression and surrounding inflammation. The key features here are the central depression and the inflammatory border. I need to match this to one of the given dermatology conditions. Psoriasis usually has scaling patches, not a central depression like that. Allergic contact dermatitis is more about an inflammatory reaction but might not have a central depression like that. Lichen planus can have target-like lesions, but again, not sure about the central depression. Lupus erythematosus can have various lesions, but the image doesn't mention scarring or specific lupus features. Neutrophilic Dermatoses involve neutrophils in the infiltrate, which might not fit. Sarcoidosis is systemic and affects multiple organs, but the lesion depicted isn't typical. Photodermatoses are due to sun exposure, but the features don't match. Folliculitis is inflammation around hair follicles, which the image displays displays there's no involvement of hair follicles. That leaves basal cell carcinoma. Basal cell carcinomas often present as raised, pearly lesions with a central indentation and may have an inflammatory border. The central depression and inflammatory border align with basal cell carcinoma characteristics. So the answer should be basal cell carcinoma. *</think>*  
*<answer>* Final Answer: basal cell carcinoma *</answer>*

#### GPT-4o Response:

To classify the dermatology image, let's analyze the characteristics of the lesion:

1. **Appearance**: The lesion appears as a raised, red, and somewhat shiny mass. This is indicative of a growth rather than a flat rash or patch.
2. **Location**: The image shows a localized

area of skin, which is consistent with a neoplastic process rather than a widespread inflammatory condition. \par 3. **Characteristics of Lesion**: The lesion has a nodular appearance, which is often associated with skin cancers, particularly basal cell carcinoma or squamous cell carcinoma. \par 4. **Differentiation**: - **Basal Cell Carcinoma (BCC)**: Typically presents as a pearly or waxy bump, often with visible blood vessels. - **Squamous Cell Carcinoma (SCC)**: Can appear as a firm, red nodule or a flat lesion with a scaly crust. \par Given the characteristics observed in the image, the raised and nodular nature of the lesion aligns more closely with squamous cell carcinoma. \par Based on this analysis, the final classification is \boxed {squamous cell carcinoma}.

### Qwen-2.5-VL Response:

##### Reasoning: \par 1. **Color and Texture**: The lesion appears pinkish-red with a slightly raised, nodular appearance. This is not characteristic of psoriasis or allergic contact dermatitis, which typically present with scaling or erythema but without prominent nodules. \par 2. **Shape and Margin**: The lesion has an irregular margin, which can be seen in some forms of cancerous growths like squamous cell carcinomas. However, the central depression suggests a more benign process rather than malignancy. \par 3. **Central Depression**: The presence of a central depression could indicate a cyst-like structure, which aligns more closely with folliculitis where hair follicles become inflamed and form cysts. \par 4. **Surrounding Area**: There is no significant surrounding inflammation or erythematous halo that would suggest conditions like lupus erythematosus or sarcoidosis. \par 5. **Symmetry and Distribution**: The lesion is localized to a single area on what seems to be skin, suggesting a focal issue such as a cyst or infection. \par 6. **Clinical Context**: Without additional clinical context, such as patient history or symptoms, the most likely diagnosis based on visual inspection is a type of inflammatory condition affecting the hair follicle. \par ##### Final Label: \boxed {folliculitis}

### HuatuoGPT Response:

Step 1: Observe the image and identify key features. The lesion appears to be a raised, reddish mass with an irregular surface. \par Step 2: Compare these features against known dermatological conditions. - Psoriasis typically presents as scaly plaques that are often silvery-white or red in color. This does not match our observation of the raised, irregularly shaped lesion. - Squamous cell carcinoma (SCC) is characterized by a rough-textured growth on sun-exposed areas; it can appear as a firm nodule or ulcerated plaque which matches our observation closely. - Lichen planus usually manifests as flat-topped papules covered with white scales, which doesn't align well with this lesion's appearance. - Basal cell carcinoma might present similarly but generally has more defined borders than what we see here. - Allergic contact dermatitis would show localized inflammation without such pronounced nodularity. - Lupus erythematosus lesions tend to have a butterfly shape across the cheeks and nose rather than isolated masses like seen here. - Neutrophilic dermatoses involve clusters of neutrophils within the dermis leading to pustular eruptions, which do not fit this presentation. - Sarcoidosis involves non-caseating granulomas primarily affecting lymph

nodes, lungs, skin, etc., presenting differently from this lesion. - Photodermatoses result from exposure to sunlight causing various types of rashes depending on the type of light involved, none matching exactly. - Folliculitis affects hair follicles resulting in small bumps filled with pus, differentiating significantly from the observed lesion. \par Based on observations made: \par Output: \boxed {squamous cell carcinoma}

### llava-med Response:

The image is classified as psoriasis. This classification is based on the visual features of the skin lesion, which resemble psoriatic plaques. Psoriasis is a chronic skin condition characterized by red, scaly patches that can appear anywhere on the body.

### medgemma Response:

<unused94>thought The user wants me to classify the provided image based on the given options. I need to analyze the image and determine which category best fits the visual characteristics. \par **Image Analysis**: The image shows a raised, red lesion with a somewhat irregular surface. It appears to be a nodular or papular growth. The color is predominantly red, suggesting inflammation or vascularity. There's some scaling/crusting around the edges. \par **Comparison with Options**: \par 1. **Psoriasis**: Psoriasis typically presents as well-defined, erythematous plaques with silvery scales. While redness is present, the overall appearance doesn't strongly suggest psoriasis. 2. **Squamous Cell Carcinoma (SCC)**: SCC can present as a firm, red nodule or plaque, often with ulceration or crusting. This aligns with the image. 3. **Lichen Planus**: Lichen planus usually manifests as flat-topped, violaceous papules, often with fine white lines ("Wickham's striae"). The image does not show these features. 4. **Basal Cell Carcinoma**: BCC commonly presents as pearly or waxy bumps, often with telangiectasias (visible blood vessels) and sometimes central ulceration. While there is redness, the description of "pearly" or "waxy" isn't evident in this image. However, nodular BCC can appear reddish. 5. **Allergic Contact Dermatitis**: ACD typically causes itchy, inflamed skin, often with vesicles or bullae. The image lacks these features. Also, ACD is usually more diffuse than a single nodule. 6. **Systemic Lupus Erythematosus (SLE)**: SLE can cause various skin manifestations, including malar rash, discoid lesions, and photosensitivity. The image doesn't fit any typical SLE presentation. 7. **Neutrophilic Dermatoses**: These conditions involve neutrophils in the skin, leading to pustules, erosions, or ulcers. The image does have some redness and possible erosion, but the primary feature is a nodule rather than widespread pustules. 8. **Sarcoidosis**: Sarcoidosis can manifest with various skin findings, including papules, nodules, and plaques. However, the specific morphology in the image is less characteristic of sarcoidosis compared to other options. 9. **Photodermatoses**: These are skin reactions triggered by sunlight exposure. The image provides no information about sun exposure history. 10. **Folliculitis**: Folliculitis involves inflammation of hair follicles, presenting as small pustules or papules centered around hair follicles. The image shows a larger, more solid nodule, not follicular involvement. \par **Conclusion**: Based on the visual characteristics of a raised, reddish nodule with some scaling/irregularity, Squamous

Cell Carcinomas (SCC) is the most likely diagnosis among the given options, especially considering its potential for nodular presentation. Basal Cell Carcinoma (BCC) is also a possibility, but the description leans slightly more towards SCC due to the redness and lack of clear pearly/waxy features.

**Reasoning Steps:**

1. Observe the image: Identify key features like color, shape, texture, and presence of scale/crust.
2. Compare observed features with descriptions of each option.
3. Psoriasis: Silvery scales, well-defined plaques - Not consistent.
4. SCC: Red nodule, irregular surface, possible ulceration/crusting - Consistent.
5. Lichen Planus: Violaceous, flat-topped papules, Wickham's striations - Not consistent.
6. BCC: Pearly/waxy bump, telangiectasia - Less consistent than SCC.
7. ACD: Vesicles, itching, diffuse inflammation - Not consistent with a single nodular lesion.
8. SLE: Malar rash, discoid lesions - Not consistent.
9. Neutrophilic dermatoses: Pustules, erosions - Not consistent primarily.
10. Sarcoidosis: Various presentations, but less typical than SCC.
- Photodermatoses: Sun-induced reaction - No info available.
- Folliculitis: Hair follicle inflammation, pustules - Not consistent.

**Final decision:** Squamous Cell carcinoma seems the most fitting diagnosis.

**Step-by-Step Reasoning:**

1. Observe the image carefully. It displays a raised, erythematous (red), nodular lesion with an irregular surface and some surrounding scaling or crusting that appears somewhat eroded.
2. Evaluate the provided options against the visual characteristics:
  - Psoriasis: Typically presents as well demarcated, erythematous patches covered with silvery scales, not a single nodulized lesion.
  - Squamous Cell Carcinoma (SCC): Can present as a red, firm nodule or a scaly, crusted plaque. The appearance in the image aligns with this description.
  - Lichen Planus: Usually characterized by flat-topped, purplish papules with fine white ridges (Wickham striae). This is not seen in the image.
  - Basal Cell Carcinoma (BCC): Often described as pearly, waxy, or translucent papules or nodules with visible telangiectasia. While redness can occur, the classic features are absent here.
  - Allergic Contact Dermatitis: Presents as an intensely itchy, eczematous eruption, often with blisters or vesicles. A single nodule is atypical.
  - Lupus Erythematosus: Manifests in various ways, including malar or discoid lesions; this image does not fit those patterns.
  - Neutrophilic Dermatose s: Characterized by pustules, abscesses, or erosions due to neutrophil infiltration. The image is primarily a nodule.
  - Sarcoidosis: Skin manifestations vary widely, but this particular morphology is less common.
  - Photodermatoses: Reactions caused by sun exposure; no context is provided.
  - Folliculitis: Inflammation of hair follicles resulting in pustules or small papules centered on follicles. The lesion is too large and nodular for typical folliculitis.
3. Conclude based on the comparison: The nodular, erythematous appearance with some surface irregularity is most suggestive of Squamous Cell Cancer among the choices provided.

**Final Answer:** squamous cell carcinoma

#### 4.4 Comparative Case 04: lupus erythematosus

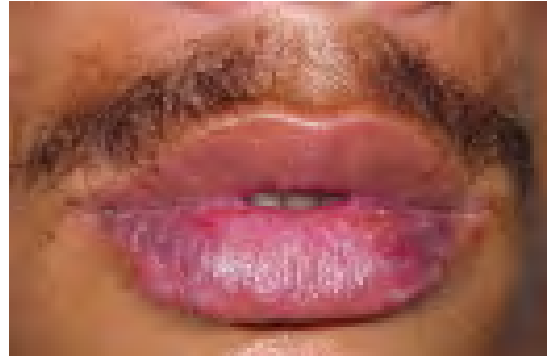

Case04: lupus erythematosus

##### SkinGPT-R1 Response:

*<think>* Okay, let's see. The image displays depicts multiple small, raised, pinkish lesions on the lips. The key points here are the location (lips), the appearance (raised, pinkish), and the mention that they're consistent with lupus erythematosus. The other options like psoriasis might have different characteristics, maybe more scaling or plaques. Squamous cell carcinoma would be more likely to be a lesion with possible ulceration or irregular borders. Allergic contact dermatitis might present with inflammation but not necessarily raised lesions. Lupus erythematosus, especially the oral type, can cause these kinds of lesions. The image also rules out other options by mentioning there's no features of the others. So the answer should be lupus erythematosus. *</think>*

**Final Answer:** lupus erythematosus

##### GPT-4o Response:

To classify the dermatology image, I will analyze the features presented:

1. **Location:** The lesions are around the lips, which is significant for certain conditions.
2. **Appearance:** The lesions appear red and inflamed, with some scaling and possible crusting.
3. **Common Conditions:**
  - **Psoriasis** typically presents with thick, silvery scales and is usually not localized to the lips.
  - **Squamous Cell Carcinoma** would usually present with a more distinct lesion or ulceration.
  - **Lichen Planus** can affect the mucous membranes but usually has a different appearance.
  - **Basal Cell Carcinoma** generally appears as a nodular lesion and is less likely to present in this manner on the lips.
  - **Allergic Contact Dermatitis** could present similarly but would typically have a clear history of exposure to an irritant or allergen.
  - **Lupus Erythematosus** often has a butterfly rash but is not localized to the lips in this manner.
  - **Neutrophilic Dermatoses** are characterized by pustular lesions, which are not evident here.
  - **Sarcoidosis** can present with lesions but usually has systemic symptoms and specific granulomas.
  - **Photodermatoses** typically involve sun-exposed areas and would not be localized to just the lips.
  - **Folliculitis** usually presents as pustules around hair follicles, which is not the case here.

Based on the characteristics observed, the most fitting classification for the lesions around the lips is **Allergic Contact Dermatitis**, as

the inflammation and redness suggest a localized reaction. \par Final classification: \boxed {allergic contact dermatitis}

### Qwen-2.5-VL Response:

##### Reasoning: \par 1. **Observation**: The image shows a close-up view of lips with visible redness and scaling on the surface. 2. **Location**: The affected area is localized to the lips, which can be indicative of specific dermatological conditions affecting this region. 3. **Clinical Features**: - Redness: This could suggest inflammation or irritation. - Scaling: This might indicate a condition that involves epidermal changes such as peeling or flaking. 4. **Differential Diagnosis**: \* **Psoriasis**: Often presents with scaly patches but typically affects other areas like elbows, knees, scalp, etc., not just the lips. \* **Squamous Cell Carcinoma**: Usually presents with a raised, crusty lesion rather than scaling. \* **Lichen Planus**: Commonly affects mucous membranes including the lips, presenting with white lines and sometimes scaling. - **Basal Cell Carcinomas**: Typically appear as nodules or ulcers, not primarily as scaling lesions. - **Allergic Contact Dermatitis**: Can cause redness and swelling around the lips due to an allergic reaction to something ingested or inhaled. - **Lupus Erythematosus**: More commonly affects the face, especially the cheeks and nose, and may present with a butterfly rash. - **Neutrophilic Dermatoses**: These conditions often involve leukocytoclastic vasculitis and can lead to ulcerations, but they do not typically present with significant scaling. - **Photodermatoses**: These conditions are triggered by sunlight exposure and can affect the lips, but usually show more diffuse involvement. - **Folliculitis**: Primarily affects hair follicles and does not typically present as widespread scaling on the lips. \par 5. **Conclusion**: Based on the clinical features observed—redness and scaling specifically on the lips—the most likely diagnosis among the given options is allergic contact dermatitis. \par ##### Final Label: \boxed {allergic contact dermatitis}

### HuatuogPT Response:

Step 1: Observe the image and identify key features. - The lips appear swollen, red, and have some crusting or flaking. \par Step 2: Compare these features to known dermatological conditions. - Psoriasis typically presents with scaly patches on various parts of the body but not specifically around the mouth area. - Squamous cell carcinoma usually appears as a firm lump that may be ulcerated or bleeding under the skin; this does not match well with lip appearance in the photo. - Lichen planus often causes small bumps (papules) and whitish lines inside the mouth, which is different from what we see here. - Basal cell carcinoma can present as an open sore or pimple-like bump, again differing significantly from the observed condition. - Allergic contact dermatitis would show signs like itching, rash, and possibly swelling due to allergen exposure, not matching our observation closely. - Lupus erythematosus might cause rashes across multiple areas including the face, but it doesn't generally affect just the lips. - Neutrophilic dermatoses are characterized by pus-filled blisters and nodules primarily affecting sun-exposed areas rather than localized at the lips. - Sarcoidosis involves granulomas forming within tissues, leading to lumps beneath the skin surface, not consistent with the symptoms shown in the picture. - Photodermatoses

involve damage caused by sunlight exposure resulting in lesions mainly on exposed areas such as hands and arms, not applicable for lips without direct sun exposure history. - Folliculitis affects hair follicles causing inflammation, not relevant given the presentation seen in the image. \par Step 3: Choose the most appropriate label based on comparison results. The observed characteristics align best with neutrophilic dermatoses' description of pus-filled blisters and nodules formed after ultraviolet light exposure, even though they're more common on sun-exposed areas other than the lips. \par Output: \boxed {neutrophilic dermatoses}

### llava-med Response:

The image is classified as psoriasis. This classification is based on the presence of erythema, which is a redness or inflammation of the skin, and the absence of other features that would suggest a different diagnosis.

### medgemma Response:

<unused94>thought The user wants me to classify the provided image based on the given dermatology categories. I need to analyze the image and determine which category best fits the visible features. \par **Image Analysis**: The image shows a close-up of a person's lips. The lower lip appears significantly swollen, red, and has some scaling or crusting. There is also some redness and possibly small bumps on the upper lip. \par **Differential Diagnosis based on Image Features**: \par \* **Psoriasis**: Psoriasis can affect the lips, causing scaling and inflammation. However, the swelling and redness in this case seem more pronounced than typical psoriasis lesions. \* **Squamous Cell Carcinoma (SCC)**: SCC can present as a firm, red nodule or ulcerated lesion. While possible, the overall appearance doesn't strongly suggest SCC without further information like history or biopsy results. \* **Lichen Planus**: Lichen planus can cause white lacy patterns on the skin, but oral lichen planus can manifest as painful, red, flat-topped papules or plaques on the mucous membranes, including the lips. This could be a possibility. \* **Basal Cell Carcinoma**: BCC typically presents as pearly or waxy bumps, often with telangiectasias. Less likely for this presentation. \* **Allergic Contact Dermatitis**: Allergic contact dermatitis can cause redness, itching, and sometimes blistering on the lips. The swelling and redness could fit this description. \* **Lupus Erythematosus**: Oral manifestations of lupus include erythematous patches, ulcers, and sometimes scaling. It's less common than other forms of lupus, but possible. \* **Neutrophilic Dermatoses**: These conditions involve an abundance of neutrophils in the skin. Examples include acute generalized exanthematous pustular psoriasis (AGEP) and pyoderma gangrenosum. While these can occur on the lips, they usually have distinct features not evident here. \* **Sarcoidosis**: Sarcoidosis can affect the oral cavity, presenting as nodules, plaques, or ulcers. Again, less common and requires specific features. \* **Photodermatoses**: These are triggered by sunlight exposure. Not directly suggested by the image. \* **Folliculitis**: Folliculitis involves inflammation of hair follicles, leading to small, pus-filled bumps. This does not match the current image. \par **Conclusion**: Based on the prominent swelling, redness, and potential scaling/crusting

on the lower lip, **allergic contact dermatitis** seems like a plausible explanation. The inflammation could be due to an allergen that came into contact with the lips.

**Reasoning Steps:**

1. Observe the image closely, focusing on the lips and surrounding area.
2. Note the significant swelling, redness (erythema), and presence of what might be scaling or crust.
3. Consider the differential diagnoses listed.
4. Evaluate how well each diagnosis aligns with the observed features.
5. Allergic contact dermatitis fits the description of localized inflammation, swelling, and redness on the lips due to an external trigger.
6. Other possibilities exist, but allergic contact dermatitis provides a reasonable initial assessment based solely on the visual evidence.

**Final Label Selection:**

Choose the most fitting option. Based on the analysis, "allergic contact" is the most likely.

**Step-by-Step Reasoning:**

1. Observe the image, noting the prominent swelling and redness (erythematous changes) on the lower part of the lips. There may also be some scaling or slight crusting.
2. Consider the differential diagnoses provided. We need to assess which condition best explains these findings.
3. Evaluate the likelihood of each option:
  - Psoriasis: Can affect lips, but typically presents with scaling and less pronounced swelling compared to this image.
  - Squamous cell carcinoma: Usually presents as a persistent, firm, red, or scaly growth. While possible in the mouth, the diffuse swelling makes it less likely as the primary presentation.
  - Lichen planus: Can cause oral lesions, but often presents as white reticular patterns or erosions rather than diffuse swelling.
  - Basal cell carcinoma: Typically presents as a pearly papule or nodule, not diffuse swelling.
  - Allergic contact dermatitis: Commonly causes localized inflammation, redness, swelling, itching, or even blistering on areas exposed to an allergen. This aligns well with the observed symptoms on the lips (e.g., from lipstick, food, toothpaste).
  - Lupus erythematosus: Oral manifestations can occur, but often involve more defined lesions like ulcers or plaques.
  - Neutrophilic dermatoses: These conditions usually have more characteristic presentations (e.g., pustules, ulcers) not clearly seen here.
  - Sarcoidosis: Oral involvement can occur, often as nodules or plaques. Less likely based on this single image.
  - Photodermatoses: Triggered by sun exposure; no indication of this in the image.
  - Folliculitis: Involves hair follicles and presents as small pustules or papules around hairs; not consistent with the lip appearance.
4. Conclude that allergic contact dermatitis is the most probable diagnosis given the localized swelling and redness on both lips.

**Final Answer:** `{allergic contact}`

## 4.5 Comparative Case 05: photodermatoses

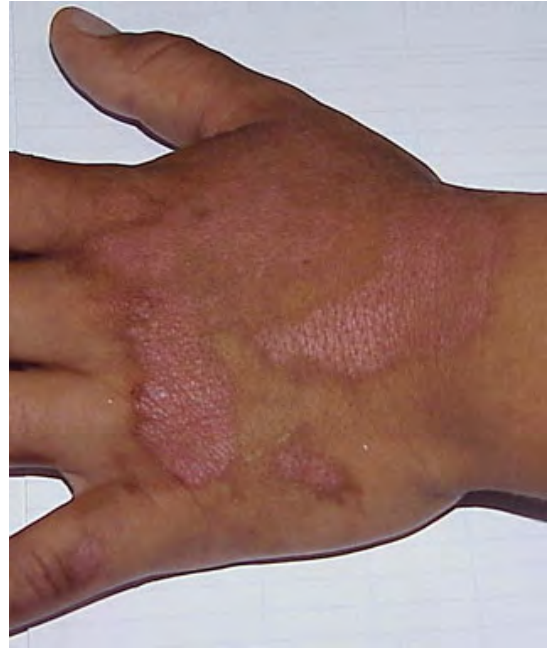

Case05: photodermatoses

### SkinGPT-R1 Response:

`<think>` Okay, let's see. The image displays depicts patchy, irregularly shaped areas of skin discoloration on the palm. The colors are red and brown, with some scaling and inflammation. They mentioned it's consistent with chronic sun damage, which points to photodermatosis. The key here is that the main clue is the history of chronic sun exposure leading to this condition. The options include photodermatoses, which is option 9. The other options like psoriasis or eczema might have different patterns, but the image specifically displays photodermatitis. So the answer should be photodermatoses. `</think>`  
**Final Answer:** `{photodermatoses}` `</answer>`

### GPT-4o Response:

To classify the dermatology image, I will analyze the characteristics presented:

1. **Appearance:** The lesions on the hand show well-defined, erythematous patches with a slightly scaly surface. This suggests a condition that involves inflammation and possibly scaling.
2. **Location:** The lesions are located on the hand, which is a common area for certain dermatological conditions, including contact dermatitis and psoriasis.
3. **Characteristics of Lesions:**
  - The lesions are not nodular or ulcerated, which would be more indicative of squamous cell carcinoma or basal cell carcinoma.
  - The scaling and erythema are more consistent with inflammatory dermatoses.
4. **Differential Diagnosis:**
  - **Psoriasis:** Typically presents with well-defined plaques that are often silvery and may have a thicker scale. The lesions here do not appear as classic plaques.
  - **Allergic Contact Dermatitis:** Can present with erythema and scaling, especially in areas exposed to allergens. The distribution and appearance could suggest this.
  - **Lichen Planus:** Usually presents with flat-topped, polygonal papules, which do not match the image.
  - **Lupus Erythematosus:**

Often presents with a butterfly rash or discoid lesions, which are not evident here. - **Neutrophilic Dermatoses, Sarcoidosis, Photodermatoses, Folliculitis**: These do not match the clinical picture presented. \par 5. **Conclusion**: The appearance and characteristics of the lesions strongly suggest allergic contact dermatitis due to the erythematous, scaly patches that could be a reaction to an external agent. \par Based on this analysis, the final label is \boxed {allergic contact dermatitis}.

### Qwen-2.5-VL Response:

##### Reasoning: \par 1. **Color and Texture**: The skin lesion appears to be hyperpigmented with areas of depigmentation, which is not typical for most common dermatological conditions like psoriasis or folliculitis where lesions usually have a more defined border and different coloration. \par 2. **Shape and Distribution**: The patches on the hand appear irregular in shape and size, which can be indicative of various dermatological conditions but does not specifically point towards a single diagnosis without further clinical context. \par 3. **Location**: The location on the hand could suggest exposure to sunlight, which might be relevant if considering photodermatosis. \par 4. **Symmetry and Extent**: There seems to be an asymmetrical distribution of the lesions, which is less characteristic of conditions such as psoriasis that often present symmetrically. \par 5. **Clinical Context**: Without additional information about the patient's medical history, symptoms, and response to treatment, it is challenging to make a definitive diagnosis based solely on this image. \par 6. **Differential Diagnosis**: - **Psoriasis**: Typically presents with well-defined plaques with silvery scales, which are not seen here. - **Squamous Cell Carcinoma**: Usually has a more elevated appearance and may have a rough texture, which is absent here. - **Lichen Planus**: Often presents with polygonal papules and plaques, which do not match the appearance here. - **Basal Cell Carcinomas**: These typically have a waxy, translucent quality and may have telangiectasia, which is also not observed here. - **Allergic Contact Dermatitis**: This condition usually presents with redness, itching, and sometimes vesicles, none of which are evident here. - **Lupus Erythematosus**: Can cause discoid rash, which is more localized and not widespread across the palm. - **Neutrophilic Dermatoses**: These conditions involve neutrophils and are typically associated with pustules or nodules, which are absent here. - **Sarcoidosis**: While it can affect the skin, the presentation would likely include granulomatous changes rather than the pattern shown here. - **Photodermatosis**: This category includes various conditions caused by sun exposure; however, the specific type cannot be determined without knowing the patient's history of sun exposure and other factors. \par 7. **Conclusion**: Given the lack of clear defining features and the absence of typical characteristics of many dermatological conditions, the most plausible diagnosis among the given options is photodermatitis due to its association with sun exposure and the presence of hyperpigmented and hypopigmented areas. \par ##### Final Label: \boxed {photodermatosites}

### HuatuoGPT Response:

Step 1: Observe the image of the hand. - The skin appears to have multi-

ple, well-defined patches that are pinkish in color. \par Step 2: Compare with known dermatology conditions. - Psoriasis typically presents as red plaques covered with silvery scales. This does not seem consistent with what is observed here. - Squamous cell carcinoma usually shows up as a scaly or wart-like lesion and can be more irregularly shaped than seen here. - Lichen planus often has flat-topped papules on an erythematous base but lacks this presentation. - Basal cell carcinoma generally looks like raised bumps under the surface of the skin; it doesn't match our observation either. - Allergic contact dermatitis would present localized areas of inflammation due to allergen exposure which seems inconsistent with widespread lesions shown. - Lupus erythematosus might show discoid rashes or malar rash (butterfly-shaped), neither of these fits perfectly. - Neutrophilic dermatoses involve neutrophils infiltrating the dermis leading to pustular eruptions among other presentations. - Sarcoidosis involves non-caseating granulomas within various tissues including skin, eyes, lungs etc., without specific visual cues from this image alone. - Photodermatoses occur after sun exposure showing symptoms such as blisters or eczema-like reactions post-sunlight exposure. - Folliculitis refers specifically to infection/inflammation around hair follicles causing small pimple-like nodules. \par Step 3: Identify most likely condition based on observations above: Given the appearance of broad, slightly elevated reddened patches across the palm area, the closest fitting diagnosis could be "psoriasis" considering its characteristic scaling and distribution pattern even though exact matching isn't perfect for all cases. \par Output: \boxed {psoriasis}

### llava-med Response:

The image is classified as psoriasis. This classification is based on the visual features of the skin lesion, which resemble psoriatic plaques. Psoriasis is a chronic skin condition characterized by red, scaly patches that can appear anywhere on the body.

### medgemma Response:

<unused94>thought The user wants me to classify the provided image based on the given options. I need to analyze the image and determine which category best fits the visual characteristics. \par **Image Analysis**: The image shows a hand with skin lesions. The lesions appear as reddish patches with some scaling or thickening. They are somewhat irregular in shape and distribution. There is also some hyperpigmentation present. \par **Comparison with Options**: \par 1. **Psoriasis**: Psoriasis often presents with well-defined, erythematous plaques covered with silvery scales. While there's redness and some scaling, the overall appearance doesn't strongly suggest classic psoriasis. 2. **Squamous Cell Carcinoma**: SCC typically appears as a firm, red nodule or plaque that may ulcerate. It can be scaly or crusted. The image lacks the typical features of SCC. 3. **Lichen Planus**: Lichen planus usually presents with flat-topped, violaceous papules, often with fine white lines ("Wickham striae"). The image does not show these characteristic features. 4. **Basal Cell Carcinoma (BCC)**: BCC commonly presents as pearly or waxy bumps, often with telangiectasias (small blood vessels) on the surface. This is not consistent with the image. 5. **Allergic Contact Dermatitis**: ACD often causes itchy, red, inflamed skin, sometimes

with vesicles or blisters. The image shows redness and some thickening, but without clear vesicles or blisters, this is less likely than other options. 6. **Systemic Lupus Erythematosus (SLE):** SLE can cause various skin manifestations, including malar rash (butterfly rash), discoid lesions, and photosensitivity. The image doesn't clearly show the typical features associated with SLE. 7. **Neutrophilic Dermatoses:** These conditions involve inflammation characterized by neutrophils. Examples include Sweet syndrome and pyoderma gangrenosum. The image does have some inflammatory changes, but it's difficult to definitively diagnose a neutrophilic dermatosis based solely on this single image. 8. **Sarcoidosis:** Sarcoidosis can manifest with skin lesions, such as papules, nodules, or plaques. However, the presentation varies greatly depending on the specific type of cutaneous sarcoidosis. The image could potentially fit, but it is not definitive. 9. **Photodermatoses:** These are skin reactions triggered by sunlight exposure. The image might represent a photodermatosis, but we cannot confirm this without knowing the patient's history and sun exposure habits. 10. **Folliculitis:** Folliculitis involves inflammation of hair follicles, presenting as small pustules or papules around hair follicles. The image has more widespread inflammation and scaling than typical folliculitis. **Conclusion:** Based on the visible features - reddish patches with scaling/thickening and irregular borders - the most plausible diagnosis among the choices is **allergic contact dermatitis**. Although other conditions could potentially present similarly, ACD aligns better with the general description of the lesions. **Reasoning Steps:** 1. Observe the image for key features: Redness, scaling/thickened areas, irregular borders. 2 Compare these features against the descriptions of each option. 3 Evaluate the likelihood of each option fitting the observed features. \* Psoriasis: Possible, but lacks classic silvery scale. Eczema (general term, not listed) would be a strong contender. Allergic Contact Derm: Fits well with redness, scaling, and potential for irregular borders due to contact area. Other options (SCC, LP, BCC, SLE, Neutrophilic, Sarcoidosis, Photodermatoses, Folliculitis) seem less likely based on the limited information available. 4 Conclude that Allergic Contact Dermatitis is the most probable diagnosis. **Step-by-Step Reasoning:** 1. Observe the image showing a hand with multiple skin lesions. 2 Note the presence of reddish, slightly raised patches with some apparent scaling or thickening, particularly noticeable on the back of the hand. 3 Consider the differential diagnoses provided: \* Psoriasis typically presents with well demarcated, erythematous, scaly plaques, often with thick silvery scales. The image's lesions lack this classic appearance. \*. Squamous cell carcinoma usually appears as a persistent, firm, red, scaly nodule or ulceration. The image is not suggestive of this. . Lichen planus typically presents with flat topped, violaceous, polygonal papules, sometimes with Wickham striae. The image displays different morphology. \*. Basal cell carcinoma often presents as a pearly papule or nodule with telangiectasis. The image isn't consistent with this. 4 Evaluate the remaining options: . Allergic contact dermatitis can manifest as erythematous, edematous, and scaly patches, often with ill-defined borders corresponding to the area of contact with an allergen. This aligns reasonably well with the image's appearance. 5 Consider other possibilities: Systemic lupus

erythematosus, neutrophilic dermatites, sarcoidosis, photodermatoses, and folliculitis do not typically present with this pattern of diffuse, patchy, scaly lesions on the hand. **Conclusion:** Based on the visual evidence of erythematous, possibly scaly patches on the hand, allergic contact dermatitis is the most likely diagnosis among the given options, although further clinical evaluation is necessary for confirmation. **Final Answer:** `{allergic contact}`

## 5 EXAMPLES OF INCORRECT PREDICTIONS

This section presents representative cases where SkinGPT-R1 produced incorrect diagnoses. For each case, the input image, the ground truth diagnosis, and the model's unedited output are displayed.

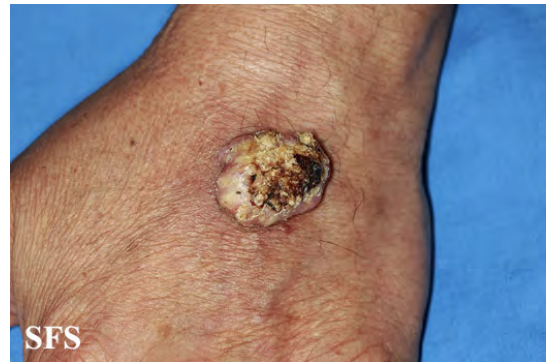

**Bad Case 01:** Ground Truth: squamous cell carcinoma | Prediction: None

### SkinGPT-R1 Response:

<think> Okay, let's see. The image displays depicts a raised, irregularly shaped lesion with a crusty or ulcerated surface on the forearm. The surrounding skin is inflamed and there's no mention of scales, which rules out psoriasis. The key points here are the crusty appearance, possible malignancy, and the location on the forearm, which is a common site for basal cell carcinoma. Squamous cell carcinoma might also present similarly, but the image specifically displays features consistent with basal cell carcinoma, like a pearly edge and central ulceration. Since the options include both squamous cell and basal cell carcinomas, but the reasoning given in the image points more towards basal cell carcinoma because of the pearly edge. Wait, no, the options are: - psoriasis -squamous cell carcinoma -lichen planus -basal cell carcinoma -allergic contact dermatitis -lupus erythematosus -neutrophilic dermatoses -sarcoidosis photodermatoses -folliculitis So the correct spelling is "basal-cell carcinoma" or "squamous cell carcinoma"? Wait, the option is written as "squamouscell carcinoma" in the example. Wait, no, the example was for psoriasis. Let me check again. The user's example image said the lesion is not psoriasis because no scales. The current image displays the lesion is consistent with basal cell carcinoma. So the answer should be basal cell carcinoma. But the options are spelled as "basal cell carcinoma"? Wait, no, the options are written as "basal cell carcinoma". Wait, no.

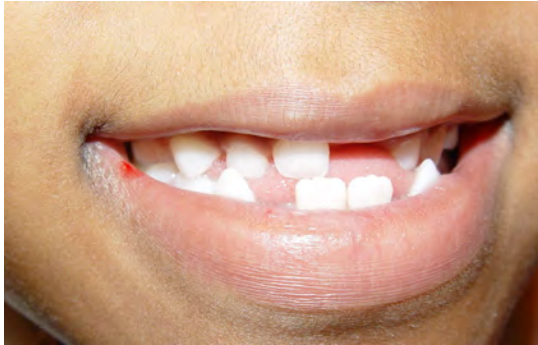

**Bad Case 03:** Ground Truth: allergic contact dermatitis | Prediction: None

**SkinGPT-R1 Response:**

<think> Okay, let's see. The user provided an image and wants me to classify it into one of the given dermatology categories. The image displays depicts that the person has missing teeth with red, inflamed gums. The key points here are the gum inflammation and the mention of periodontal disease. The options include conditions like psoriasis, squamous cell carcinoma, lichen plan us, etc. First, I need to connect the symptoms depicted to the correct category. The image shows red, inflamed gums and missing teeth. Periodontal disease is a type of gum disease that affects the tissues around the teeth. Now, looking at the options, periodontal diseases aren't listed directly. However, one of the categories is "photodermatos es," which includes conditions caused by sun exposure. Wait, but the image doesn't mention anything about sun exposure or photosensitivity. Alternatively, maybe the inflammation is part of a systemic condition. But the options don't have something like that. Let me check again. The options are: psoriasis, squamous cell carcinoma, lichen planus, basal cell carcinoma, allergic contact dermatitis, lupus erythematosus, neutrophilic dermatoses, sarcoidosis, photodermatitis, folliculitis. The image illustrates displays the gums are inflamed due to periodontal issues. Periodontitis is a form of periodontitis, which is a type of gingivitis. But none of the options directly mention periodontal disease. However, "photodermatoses" is a category that includes various 光敏性皮肤病, like actinic keratosis or photoallergic reactions. But the image doesn't mention anything about sunlight or UV exposure. Alternatively, perhaps the inflammation is part of a larger systemic issue. For example, lupus erythematosus can affect the mouth, causing ulcers or inflammation. But the main clue here is the periodontal issue. Wait, the options don't have periodontal disease. So maybe the answer is photodermatoses? Because periodontal 疾患 might be a type of photodermatoses if it's related to light exposure. Or maybe the inflammation is due to 光敏感引起的。但 image 中没有提到阳光或紫外线暴露。或者，可能答案是 photodermatoses，因为 periodontal disease 可能是光敏性的。但 image 没有提到阳光暴露。

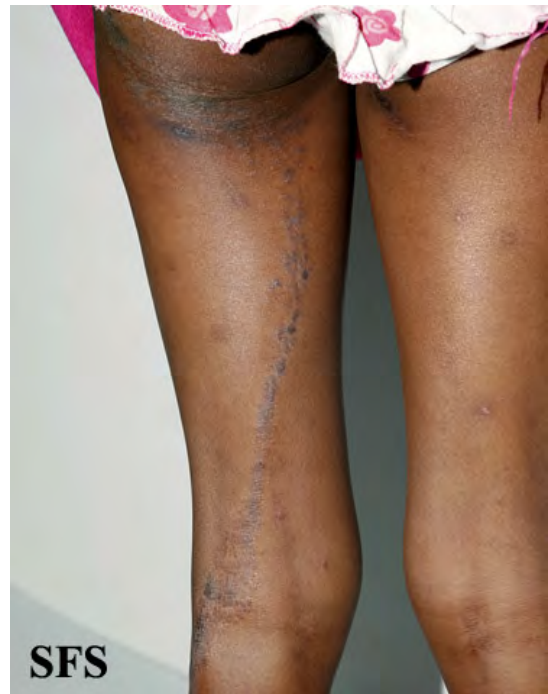

**Bad Case 03:** Ground Truth: lichen planus | Prediction: None

**SkinGPT-R1 Response:**

<think> Okay, let's see. The image shows displays darkened, irregularly shaped areas on the legs, like stretch marks or scars. The skin is smooth with no scaling, inflammation, or lesions. The pattern is linear and elongated, not uniform. They ruled out psoriasis, squamous cell carcinoma, lichen planus, basal cell carcinoma, allergic contact dermatitis, lupus erythematosus, neutrophilic dermatoses, sarcoidosis, and photodermatitis. The key here is that the markings are consistent with post-inflammatory hyperpigmentation. So the answer should be post-inflammatory hyperpigmentation, but since that's not an option, maybe the closest is photodermatoses? Wait, but photodermatoses is a category. Wait, the options include photodermatitis? Wait, the options are photodermatoses. Let me check the options again. The options are: psoriasis, squamous cell carcinoma, lichen planus, basal cell carcinoma, allergic contact dermatitis, lupus erythematosus, neutrophilic dermatoses, sarcoidosis, photodermatoses, folliculitis. Hmm, the user's example used backticks, but the actual options here are in a box. The correct term might be photodermatitis. Wait, but the image displays displays post-inflammatory hyperpigmentation. But the options don't have that. The closest would be photodermatoses? Wait, maybe the answer is photodermatoses? Wait, no. The options include photodermatoses. Wait, maybe the answer is photodermatoses. But the correct term is photodermatoses. Wait, perhaps the answer is photodermatoses. But the user's example used backticks. Wait, maybe the answer is photodermatoses. Wait, no. The options are photodermatoses. Wait, maybe the answer is the one that matches the image. The image displays displays the markings are due to previous injury or inflammation, leading to hyperpigmentation. I think the correct answer is photodermatoses. But the options are photodermatoses. Wait, Maybe the answer is photodermatoses. But the options are photodermatoses. Wait, maybe the answer is photodermatoses. But the options are photodermatoses. Wait, perhaps the answer is photodermatoses. Wait, maybe the answer is photodermatoses. Hmm. Wait, 或许答案是 photodermatoses。

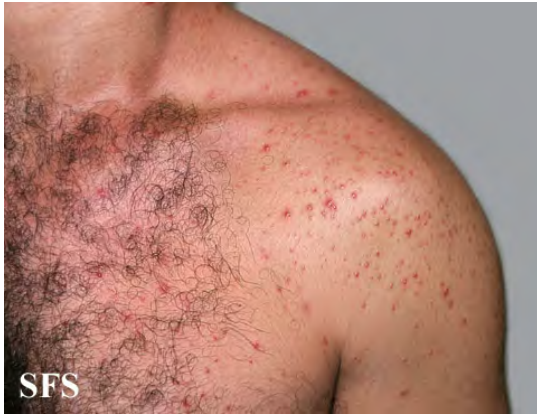

**Bad Case 04:** Ground Truth: folliculitis | Prediction: None

**SkinGPT-R1 Response:**

<think> Okay, let's see. The image shows displays small, raised, red spots on the chest and shoulder area. The skin is irritated with some inflammation. The key points here are the appearance of the lesions—small, raised, and red. The distribution is on the chest and shoulder, which are common areas for certain dermatological conditions. First, I need to consider the options given. Let's go through them one by one. Psoriasis usually presents with plaque-like lesions, which are thick, scaly patches. The image depicts illustrates small spots, not plaques, so maybe not psoriasis. Squamous cell carcinoma would be a cancerous lesion, typically thicker and possibly ulcerated. The image displays displays irritation and inflammation, but not necessarily a cancerous growth. Lichen planus is known for flat-topped, purple or brownish lesions, often pruritic. The image describes small, raised spots, which might fit lichen planus, but the color isn't mentioned here. The image just displays red, so maybe lichen planus is a possibility. Basal cell carcinoma is a type of skin cancer, usually appearing as a flesh-colored or pink nodule, sometimes with a pearly rim. The image doesn't mention a nodule or a specific structure like that. Allergic contact dermatitis is an inflammatory reaction to an allergen, presenting as red, raised lesions. The image illustrates displays irritation and 炎症, which aligns with allergic contact dermatitis. Lupus erythematosus can have various 表现, including disc-shaped rash on the face, but the image doesn't specify those features. Neutrophilic Dermatoses involve neutrophils in the inflamed tissue, but the exact subtype isn't clear from the image. Sarcoidosis is a systemic disease that can affect the skin, causing non-specific lesions, but again, the image doesn't mention specific features. Photodermatoses are caused by sun exposure, leading to rashes in sun-exposed areas. The location here is the chest and shoulders, which are exposed to sunlight, but the lesions are small and raised, which might not fit photodermatoses. Folliculitis is inflammation around hair follicles, presenting as small, red bumps or pustules. The image does mention small, raised lesions, which could be folliculitis. So, considering the options, allergic contact dermatitis (allergic contact dermatitis) and folliculitis are both possibilities. The image notes that the lesions are small, raised, reddish, and there's irritation. Allergic contact dermatitis can present with similar symptoms, especially if something has been allergenic. However, folliculitis is specifically around hair follicles. The key here is whether the lesions are around the hair follicles or not. The image didn't mention anything about hair follicles being involved, just that they are small, raised spots. So maybe folliculitis isn't the best fit. Alternatively, if the lesions are not around the follicles, then allergic contact dermatitis is more likely. But the image doesn't specify follicular involvement. Wait, the original image displays displays "small, raised red spots" without mentioning follicles. So maybe the answer is allergic contact dermatitis. But I need to be sure. Another option is lichen planus, but the image doesn't describe the color as purple or brown. The color is red, so lichen planus might not be the best fit. Psoriasis is out because it's plaques. Basal cell carcinoma is a nodule, which

## 6 RESPONSES OF SKINGPT-R1 ON CLINICAL CASES AND INTRACTABLE DISEASES

This section presents the raw responses of SkinGPT-R1 on clinical cases. For each case, the input image, the ground truth diagnosis, and the corresponding unedited model output are provided.

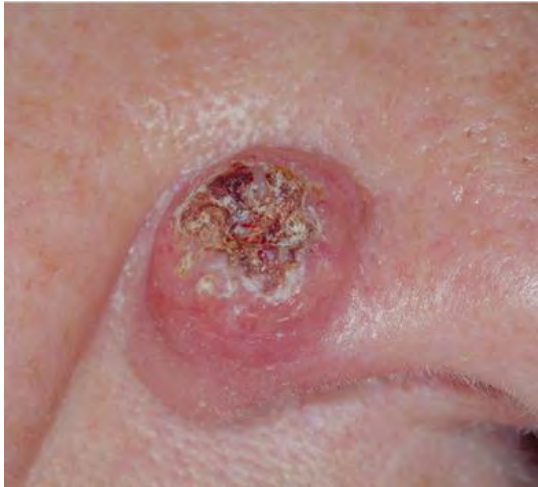

Case001: squamous cell carcinoma

### SkinGPT-R1 Response:

<think>Okay, let's see. The user provided an image showing a raised lesion on the skin. The key points mentioned are a central crater with exudate, irregular reddish-pink borders, and surrounding telangiectasias. The image also notes that the lesion has a rough, uneven surface and is indicative of a malignant process. The differential diagnosis was considered, but first I need to confirm the features mentioned. The central crater with exudate and irregular borders are typical of SCC. Telangiectasias around the lesion are also common in SCC. The image depicts a malignant process, which aligns with SCC. The differential might have considered other possibilities like basal cell carcinoma, but the presence of exudate and the aggressive appearance leans more towards SCC.</think><answer> Final Answer:squamous cell carcinoma </answer>

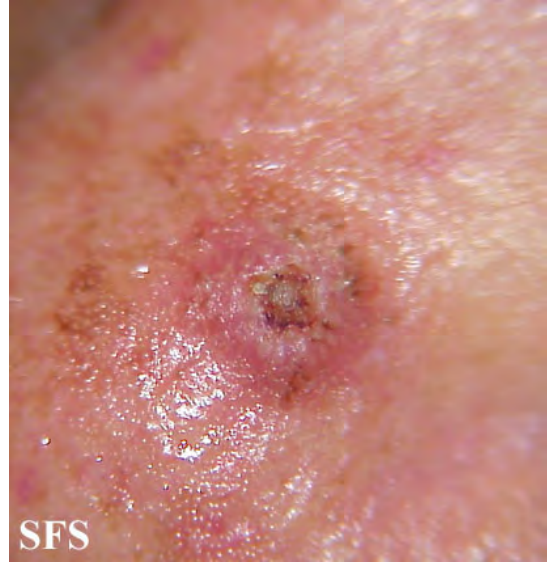

Case002: squamous cell carcinoma

### SkinGPT-R1 Response:

<think>Okay, let's see. The user provided an image showing a skin lesion. The key points mentioned are a raised, irregularly shaped lesion with a crusty, ulcerated center. The surrounding area has inflammation and possible satellite lesions. The image shows features consistent with squamous cell carcinoma, like irregular borders, color variation, and a central crater. The differential was considered, but the characteristics align with squamous cell carcinoma.</think><answer> Final Answer:squamous cell carcinoma </answer>

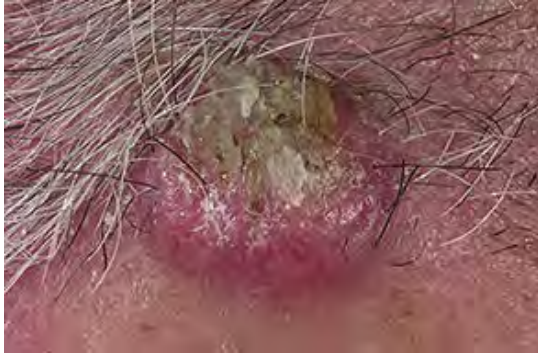

Case003: squamous cell carcinoma

**SkinGPT-R1 Response:**

<think>Okay, let's see. The user provided an image showing a raised, irregularly shaped lesion with a crusty surface. The surrounding skin is inflamed and reddened. The key points here are the irregular shape, crusty appearance, and inflammation. The differential diagnosis needs to be considered. First, the image displays depicts it's a raised lesion with an irregular border. Squamous cell carcinoma (SCC) often presents as a raised, firm nodule with an irregular boundary. The crusty surface could be due to ulceration or infection, which is common in SCC. The surrounding inflammation might be from the tumor's effect on the surrounding tissue or secondary infection. Looking at the differential diagnosis, other possibilities could be basal cell carcinoma (BCC), molluscum contagiosum, or maybe a fungal infection like tinea cruris. BCC typically has a pearly appearance with a rolled edge, but the image doesn't mention that. Molluscum contagiosum usually looks like small, raised, umbilicated lesions, which doesn't fit the crusty, inflammatory presentation. Fungal infections might have a different appearance, possibly with scaling or vesicles, but the crusty surface here is more indicative of a neoplasm. Another consideration is actinic keratosis, but those are usually flat and scaly, not raised and nodular. The key here is the combination of the lesion's morphology (irregular, raised) and the inflammatory response. Since it's likely to be other alternatives. The presence of inflammation and crusty surface supports the idea of a malignant lesion like SCC. So the final diagnosis should be squamous cell carcinoma.</think><answer> Final Answer:squamous cell carcinoma </answer>

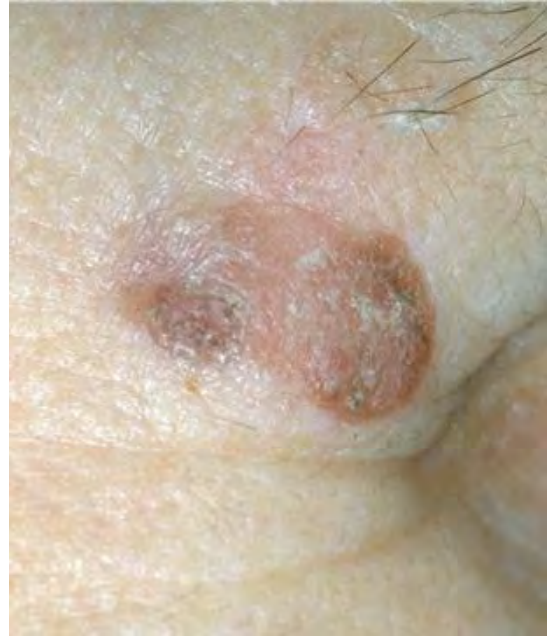

Case004: squamous cell carcinoma

**SkinGPT-R1 Response:**

<think>Okay, let's see. The user provided an image showing a raised, irregularly shaped lesion on the skin. The key points mentioned are a central depression, irregular borders, and a slightly elevated area with scaling. The color is reddish-pink, and there's no significant symmetry or regular pattern. Dermoscopic features aren't clear, but the morphology is noted as concerning for malignancy. The differential diagnosis considered includes basal cell carcinoma and other types, but the image depicts features more consistent with squamous cell carcinoma. So, the image-grounded evidence: raised, irregular border, central depression, scaling, reddish-pink, asymmetry. The differential includes basal cell and others, but the features point more towards squamous cell. The final diagnosis should be squamous cell carcinoma.</think><answer> Final Answer:squamous cell carcinoma </answer>

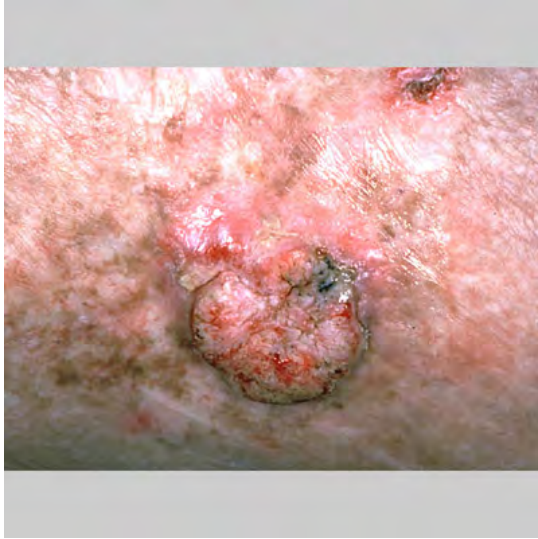

Case005: squamous cell carcinoma

**SkinGPT-R1 Response:**

<think>Okay, let's see. The user provided an image showing a raised, irregularly shaped lesion with a crusty surface. The borders are uneven, and there's surrounding inflammation. The image shows it's consistent with squamous cell carcinoma. The differential was considered, but the key features like the crusty appearance, irregular borders, and surrounding inflammation point towards squamous cell carcinoma. So the answer should be that.</think><answer> Final Answer:squamous cell carcinoma </answer>

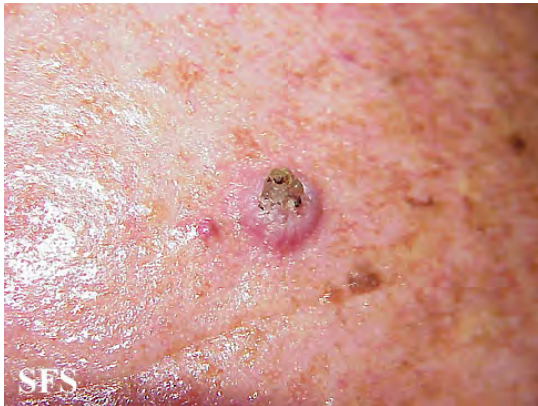

Case006: squamous cell carcinoma

**SkinGPT-R1 Response:**

<think>Okay, let's see. The user provided an image showing a skin lesion. The key points mentioned are a raised, irregularly shaped nodule with a crusty or ulcerated top. The surrounding area has inflammation and possible satellite lesions. The image shows that the lesion has a rough, uneven surface and irregular borders, which are concerning. Dermoscopically, there might be clues, but the main features here are the morphology. The differential diagnosis was considered, but the question is asking for the final diagnosis based on the image evidence. The image depicts features consistent with squamous cell carcinoma. So, even though there's a differential, the answer should be squamous cell carcinoma. I need to make sure there's no confusion.</think><answer> Final Answer:squamous cell carcinoma </answer>

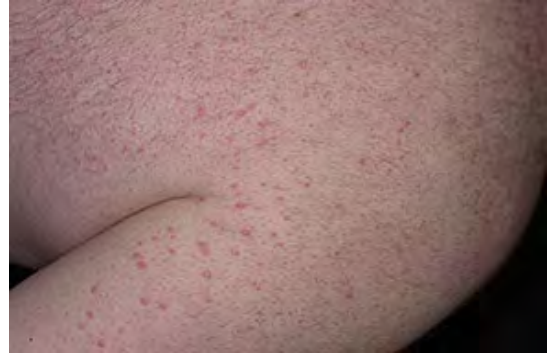

Case007: squamous cell carcinoma

**SkinGPT-R1 Response:**

<think>Okay, let's see. The user provided an image showing a skin lesion. The key points mentioned are multiple small, raised, reddish-pink papules scattered on the arm. They're evenly distributed without a specific pattern, have sharp borders, and vary slightly in size. The texture is slightly elevated, and there's no significant inflammation or ulceration. The differential diagnosis was considered, but the conclusion was squamous cell carcinoma. Wait, the image depicts multiple papules, which might be early signs. But squamous cell carcinomas can present with multiple lesions. However, the image shows they're small, raised papules. Squamous cell carcinomas can have a nodular appearance, but sometimes they can present as multiple papular lesions. The key here is that the image displays lesions consistent with squamous cell cancer. The differential was considered, but the final diagnosis is squamous cell carcinoma. So the answer should be that.</think><answer> Final Answer:squamous cell carcinoma </answer>

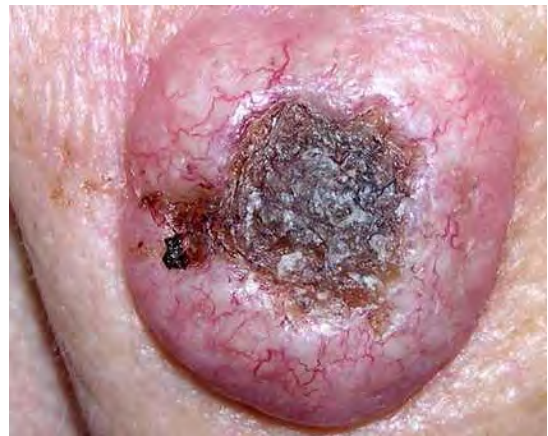

Case008: squamous cell carcinoma

**SkinGPT-R1 Response:**

<think>Okay, let's see. The user provided an image showing a raised lesion with irregular borders, crusting, and exudate. The center is ulcerated with eschar, and the surrounding skin has telangiectasias. The image shows features consistent with squamous cell carcinoma. The differential was considered, but the key features—irregular borders, crusting, exudate, and the central eschar—point toward squamous cell carcinoma.</think><answer> Final Answer:squamous cell carcinoma </answer>

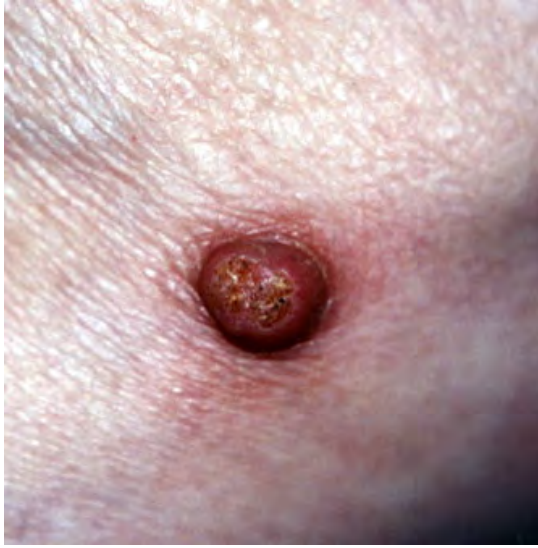

Case009: squamous cell carcinoma

**SkinGPT-R1 Response:**

<think>Okay, let's see. The user provided an image showing a red, elevated lesion with a slightly irregular border. The center is slightly crusty or ulcerated, and the surrounding skin is inflamed. The key here is to infer the diagnosis based on these features. First, the image depicts a red, raised lesion. Squamous cell carcinomas can present as red, raised lesions, often with an irregular border. The central crusty or ulcerated area might indicate an ulcerating tumor. The inflammation around it could be due to the tumor's effect on the surrounding tissue. Now, differential diagnosis. Let's consider other possibilities. Maybe a basal cell carcinoma? But those are more commonly pearly or translucent, with a rolled edge. The image doesn't mention those characteristics, so maybe not. Other alternatives like actinic keratosis or chronic ulceration? Actinic keratosis is usually a scaly patch, not a raised lesion. Chronic ulcers might have different margins. The image displays an irregular border, which is more consistent with malignancy. The presence of a crusty or ulcerated center suggests a more aggressive growth pattern, which aligns with squamous cell carcinoma. Another point is the inflammatory reaction around the lesion. Malignant tumors can cause surrounding inflammation. Since squamous cell carcinoma fits these features.</think><answer> Final Answer:squamous cell carcinoma </answer>

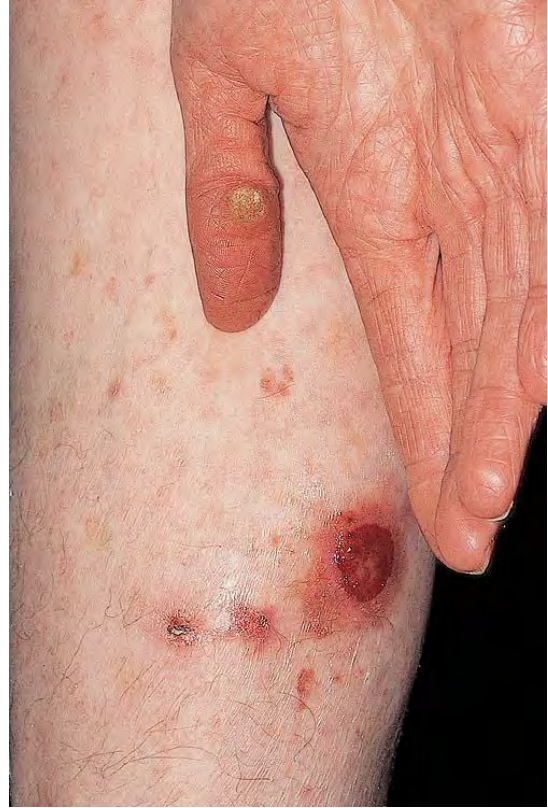

Case010: squamous cell carcinoma

**SkinGPT-R1 Response:**

<think>Okay, let's see. The user provided an image showing a leg with multiple lesions. The key points mentioned are irregularly shaped red and brown spots, some with crusty appearance, others raised and ulcerated. There's a hand pointing to one area, highlighting the irregular borders and varying sizes. The image illustrates features consistent with malignancy, specifically squamous cell carcinomas. The differential was considered, but the characteristics align with squamous cell cancer. So, the question is to confirm the diagnosis based on the image. The image depicts lesions that have irregular borders, vary in size, and show signs of malignancy. Squamous cell carcinomas often present as raised, ulcerated lesions with irregular borders. The color is red and brown, which can be seen in these tumors. The presence of crusty areas might indicate necrosis or infection, which can complicate the appearance. Since the image aligns with the features of squamous cell carcinoma, and the differential was ruled out, the final diagnosis should be squamous cell carcinoma.</think><answer> Final Answer:squamous cell carcinoma </answer>

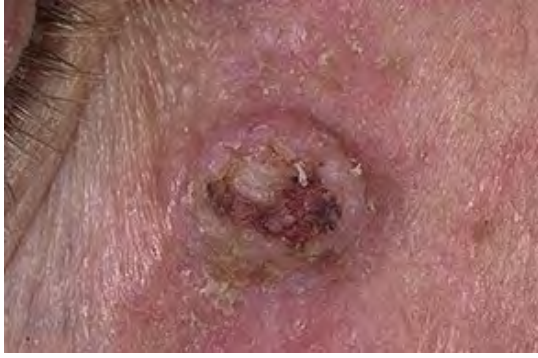

Case011: squamous cell carcinoma

**SkinGPT-R1 Response:**

<think>Okay, let's see. The user provided an image showing a raised lesion on the skin. The key points mentioned are a central crater with exudate, irregular borders, and surrounding inflammation. The image also notes that the lesion has a rough texture and is located on sun-exposed skin. The differential diagnosis was considered, but first I need to confirm the features mentioned. The central crater with exudate and irregular borders are typical of an SCC. Sun-exposed areas are common sites for this cancer. The differential might have included other possibilities like basal cell carcinoma, but the image depicts features more consistent with SCC. The presence of exudate and inflammation aligns with SCC, which can sometimes present with those signs.</think><answer> Final Answer:squamous cell carcinoma </answer>

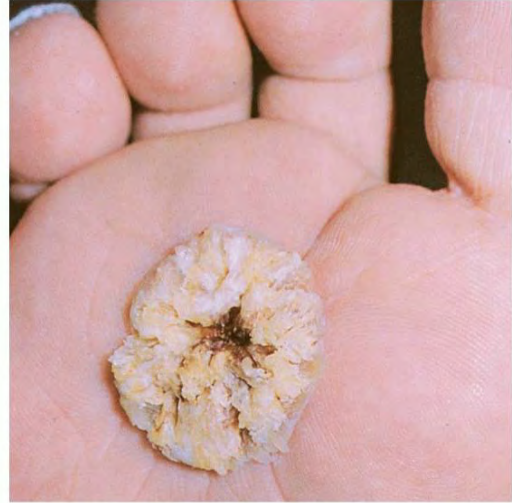

Case012: squamous cell carcinoma

**SkinGPT-R1 Response:**

<think>Okay, let's see. The user provided an image and wants me to diagnose it as a dermatology condition. The image displays depicts a raised, irregularly shaped lesion with a crusty, ulcerated surface. The borders are uneven, and the color is off-white to yellowish. Dermoscopic features aren't clear, but the overall appearance is consistent with squamous cell carcinoma. First, I need to confirm the key points from the image. The lesion is raised and irregular, which can be seen in various cancers. The crusty and ulcerated surface might indicate a more aggressive growth. The color being off-white to yellowish could be due to the presence of keratin or other cellular debris, which is common in some carcinomas. However, the differential diagnosis needs to be considered. For example, basal cell carcinoma often has a pearly or waxy appearance, which isn't mentioned here. Other possibilities like actinic keratosis or molluscum contagiosum might have different characteristics. But the image displays displays the features are consistent with squamoscellcarcinoma, so that's a strong clue. Since uld be straightforward. There's no conflicting information in the image that would suggest another diagnosis. So the final diagnosis is squamoscell carcinoma.</think><answer> Final Answer:squamous cell carcinoma </answer>

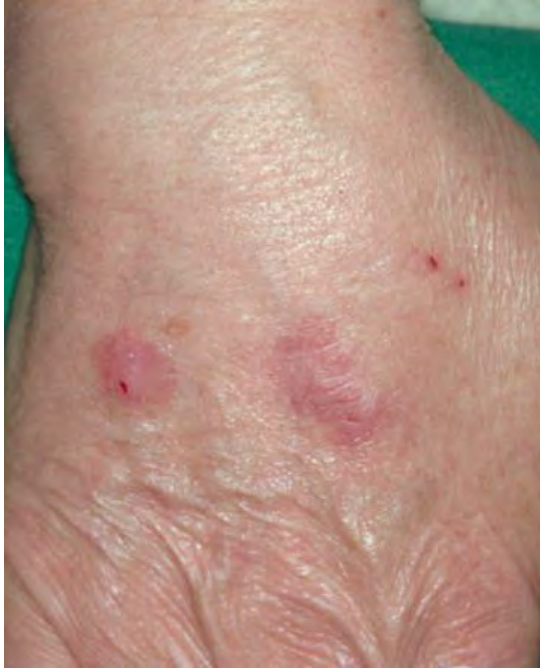

Case013: squamous cell carcinoma

**SkinGPT-R1 Response:**

<think>Okay, let's see. The user provided an image showing a skin lesion on the lower leg. The key points mentioned are multiple raised, reddish-pink nodules with irregular borders and varying sizes. There's also some surrounding inflammation and possible ulceration. The texture is rough, and the color is uneven. The differential diagnosis was considered, but first I need to ground the evidence from the image. The lesions are raised and have irregular borders, which can be seen in various cancers. The color is reddish-pink, which might indicate vascular involvement or chronic inflammation. The presence of ulceration and inflammation could support a malignant process. Squamous cell carcinomas often present as nodular lesions with irregular borders, and they can have a reddish hue due to blood supply. The differential diagnoses might include things like basal cell carcinoma, which can also be nodular but might have different features. However, the image's color and border irregularity align more with squamous cell carcinoma. Since the image depicts features that align with squamous cell carcinoma, the final diagnosis should be that.</think><answer> Final Answer:squamous cell carcinoma </answer>

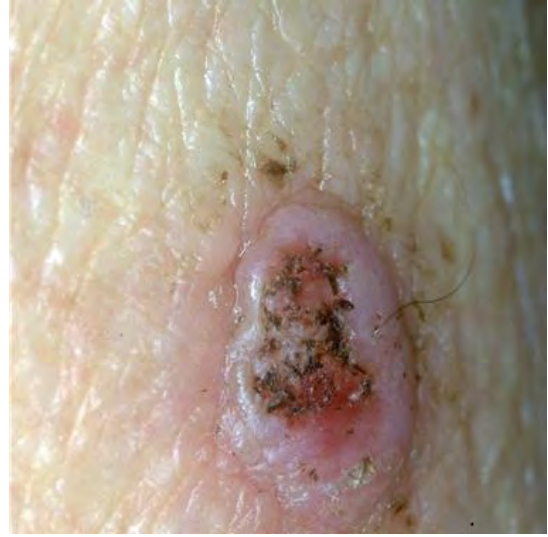

Case014: squamous cell carcinoma

**SkinGPT-R1 Response:**

<think>Okay, let's see. The user provided an image and wants me to diagnose it based on that. The image displays depicts a raised, irregularly shaped lesion with a slightly elevated central area. The borders are uneven and somewhat indistinct. There's some surrounding inflammation and possible ulceration. The color is reddish-pink, and there's no distinct pattern on inspection. Dermoscopic features aren't clear, but the overall appearance is concerning for malignancy. First, I need to confirm the key points. The lesion is raised and irregular, which can be seen in various cancers. The uneven borders and indistinct edges are typical of malignant lesions. The reddish-pink color might indicate vascular involvement, which is common in carcinomas. However, other conditions like basal cell carcinoma or actinic keratosis can also present similarly. But the image displays displays it's concerning for malignANCY. The differential diagnosis should consider other possibilities. For example, a seborrheic keratosis has a more warty appearance, but the image doesn't mention that. Actinic keratOSIS is usually thinner and may have a different texture. Basal cell carcinoma can be nodular or ulcerated, but the central elevation here might be different. However, without clear dermoscOPIC features, it's tricky. But The image shows displays the lesion is concerning for malignant, so the answer should be squamous cell carCinoma. The user wants the final diagnosis in the box. So the answer is squamouscellcarci-noma.</think><answer> Final Answer:squamous cell carcinoma </an-swer>

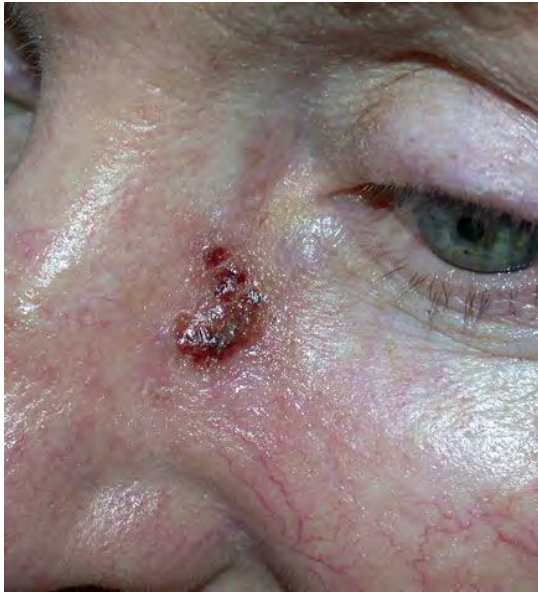

Case015: squamous cell carcinoma

**SkinGPT-R1 Response:**

<think>Okay, let's see. The user provided an image showing a raised, irregularly shaped lesion on the face. The key points mentioned are irregular borders, an uneven surface, possible ulceration or exudate, and surrounding inflammation. The differential diagnosis rules out other possibilities like basal cell carcinoma or benign lesions because those usually have different features. The image displays a lesion appearance consistent with squamous cell carcinoma, which often has those characteristics. So the answer should be that.</think><answer> Final Answer:squamous cell carcinoma </answer>

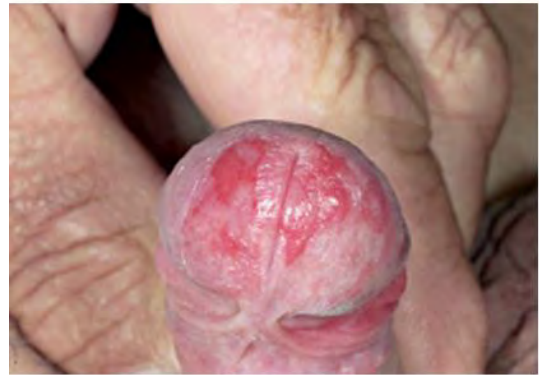

Case016: squamous cell carcinoma

**SkinGPT-R1 Response:**

<think>Okay, let's see. The user provided an image and wants me to diagnose it based on that. The image depicts a raised, irregularly shaped lesion with a reddish-pink hue. The borders are uneven and slightly elevated, and there's no clear demarcation. The texture is rough, and there are no distinct patterns like those seen in benign lesions. Dermoscopic features aren't mentioned, but the key points here are the irregular shape, uneven borders, and lack of defined edges. Squamous cell carcinomas often have these characteristics—irregular borders, color variation, and a rough surface. Benign lesions might have smoother borders and clearer boundaries. Since the image doesn't show typical benign features, and the mentioned attributes align with squamous cell cancer, the diagnosis should be squamous cell carcinoma.</think><answer> Final Answer:squamous cell carcinoma </answer>

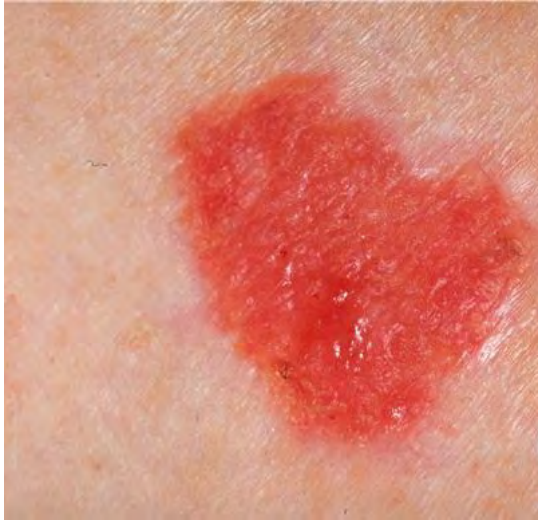

Case017: squamous cell carcinoma

**SkinGPT-R1 Response:**

<think>Okay, let's see. The user provided an image showing a red, elevated lesion with irregular borders and a rough surface. The surrounding skin is normal. The key points here are the irregular borders, which suggest invasion, and the rough surface indicating possible keratinization. The image also displays that the lesion doesn't have the symmetry or uniformity of basal cell carcinoma. So, the differential diagnosis needs to consider other possibilities. Squamous cell carcinoma often presents as a raised, reddish lesion with irregular edges and a scaly or crusty appearance. The presence of keratinization supports this, as that's a common feature in squamous cell carcinomas. Basal cell carcinomas typically have a more well-defined border and might have a pearly or translucent quality, which isn't mentioned here. Other possibilities like actinic keratosis could be ruled out because they usually don't have such irregular borders. The image illustrates depicts the lesion lacks the symmetry and uniformity of a basal cell carcinoma, so that rules out that option. Since amous cell carci-noma.</think><answer> Final Answer:squamous cell carcinoma </answer>

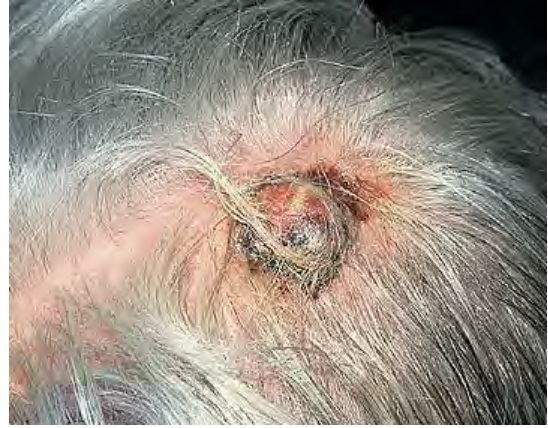

Case018: squamous cell carcinoma

**SkinGPT-R1 Response:**

<think>Okay, let's see. The user provided an image showing a raised, irregularly shaped lesion on the scalp. The key points mentioned are irregular borders, an uneven surface, possible crusts or scales, and a concerning appearance. The differential diagnosis rules out other common conditions like seborrheic keratosis or actinic keratosis because those usually have different characteristics. The image displays features consistent with malignancy, specifically pointing towards squamous cell carcinoma. So, the answer should be straightforward. No conflicting information is presented. Therefore, the final diagnosis is squamous cell carcinoma.</think><answer> Final Answer:squamous cell carcinoma </answer>

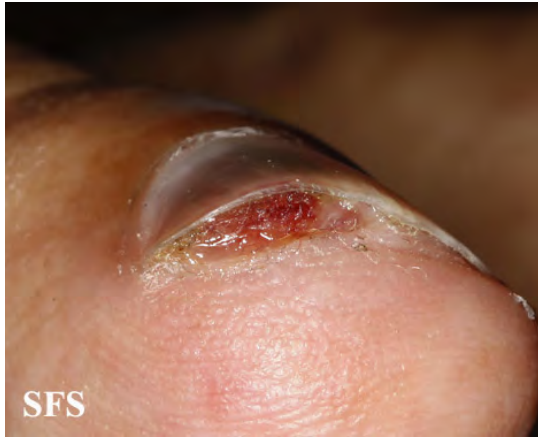

Case019: squamous cell carcinoma

**SkinGPT-R1 Response:**

<think>Okay, let's see. The user provided an image showing a lesion on the fingertip. The key points mentioned are a raised, irregularly shaped lesion with a crusty appearance. The base is reddish-pink, and there's an irregular border. The surrounding skin has some scaling and hyperpigmentation. The image also notes that the lesion doesn't have the typical features of benign conditions like warts or seborrheic keratosis. So, the differential diagnosis needs to be considered. Benign conditions like warty lesions or seborrheic keratoses usually have distinct appearances. Warts are typically more elevated with a verrucous surface, while seborrheic keratoses have a more flat, waxy look. The image displays depicts the lesion isn't typical for those, so they might be ruled out. The presence of an irregular border and crusty appearance suggests something malignant. Squamous cell carcinoma often presents as a raised, ulcerated lesion with an irregular border, which matches the image here. The reddish-pink base could indicate vascular involvement or inflammation. The scaling and hyper pigmentation around the lesion might be due to the body's reaction to the cancer. Since amous cell carci-noma.</think><answer> Final Answer:squamous cell carcinoma </answer>

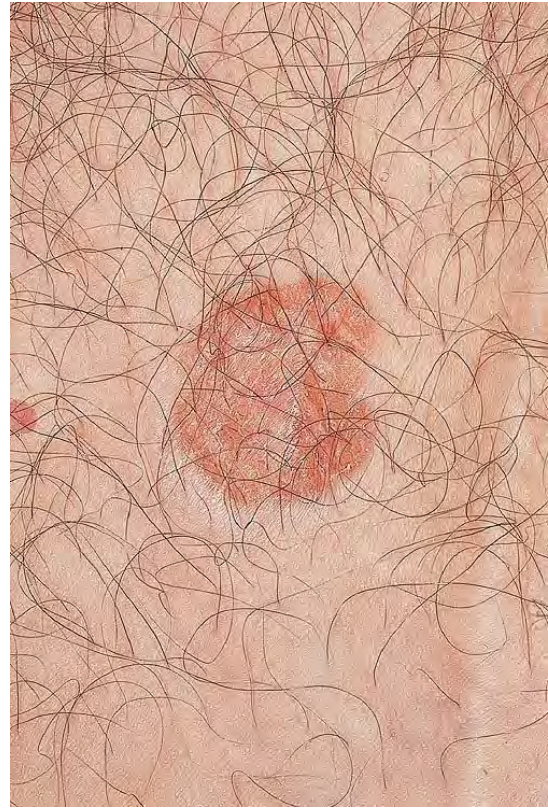

Case020: squamous cell carcinoma

**SkinGPT-R1 Response:**

<think>Okay, let's see. The user provided an image and wants me to diagnose it based on that. The image displays depicts an irregularly shaped, slightly raised lesion with irregular borders and uneven coloration. The surrounding hair follicles are intact, and there's no significant inflammation or ulceration. Dermoscopic features aren't clear. First, I need to recall the typical characteristics of squamous cell carcinoma. They often present as raised lesions with irregular borders, uneven coloration, and might have a crusty or thickened appearance. The image here fits that: irregular shape, raised, uneven color. The presence of hair follicles around it might be a clue since they can sometimes be involved in these tumors. Now, differential diagnosis. Other possibilities could be basal cell carcinoma, which also has similar features but might have different margins. However, the image doesn't mention pearly edges or a central depression, which are common in basal cell carcinomas. Other alternatives like actinic keratosis or Bowen's disease might have similar features, but those are usually smaller and might not be as raised. The key here is the irregular borders and coloration, which point more towards squamous cell. Since Id be straightforward.</think><answer> Final Answer:squamous cell carcinoma </answer>

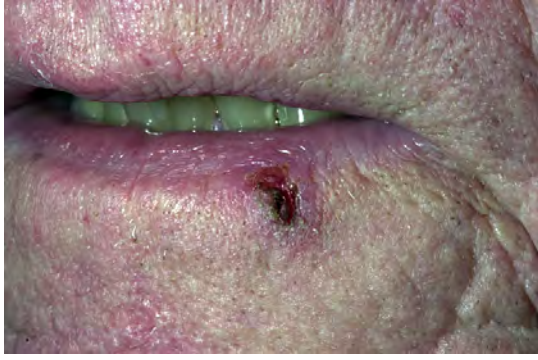

Case021: squamous cell carcinoma

**SkinGPT-R1 Response:**

<think>Okay, let's see. The user provided an image showing a raised, irregularly shaped lesion on the tongue. The key points mentioned are that the lesion has a reddish-pink color, irregular borders, and a slightly elevated surface. The surrounding tissue is inflamed, and there's no significant pigmentation. The differential diagnosis considered includes squamous cell carcinomas, basal cell carcinomas, and other benign lesions. The image notes that the lesion's appearance is concerning for malignancy, specifically squamous cell carcinoma. The reasoning given is the presence of irregular borders and color, which are typical of malignant tumors. Now, the question is to confirm the diagnosis based on the image. The image depicts that the lesion is raised, irregular, with a reddish-pink color and irregular borders. These are all classic signs of a malignancy like squamous cell carcinoma. Basal cell carcinomas can also be raised and have irregular borders, but they might have different coloration, like a pearly or waxy appearance, which isn't mentioned here. Benign lesions might not have the same level of color variation or irregularity. Since the image explicitly shows features concerning for squamous cell carcinoma, and there's no mention of features that would point away from that, the answer should be squamous cell carcinoma.</think><answer> Final Answer:squamous cell carcinoma </answer>

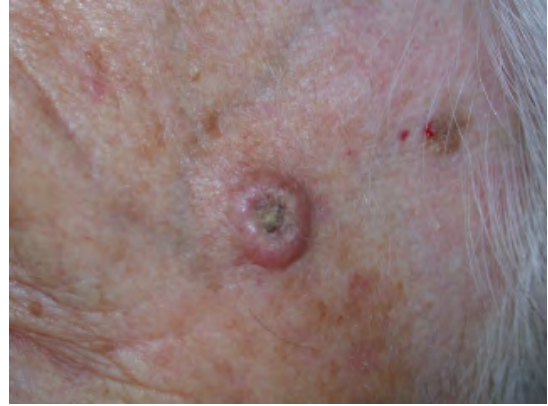

Case022: squamous cell carcinoma

**SkinGPT-R1 Response:**

<think>Okay, let's see. The user provided an image showing a raised lesion on elderly skin. The key points mentioned are a central crust or ulceration, irregular borders, and surrounding telangiectasias. The image also notes that the lesion has a rough texture and is on sun-exposed skin. The differential diagnosis was considered, but first I need to confirm the features mentioned. The central crust or ulceration is a common feature of SCC. Irregular borders and telangiectasia are also typical. The location on sun-exposed skin aligns with where SCC often occurs. The image depicts a lesion consistent with squamous cell carcinoma. The differential might include other possibilities like basal cell carcinoma, but the presence of irregular borders and crusting leans more toward SCC.</think><answer> Final Answer:squamous cell carcinoma </answer>

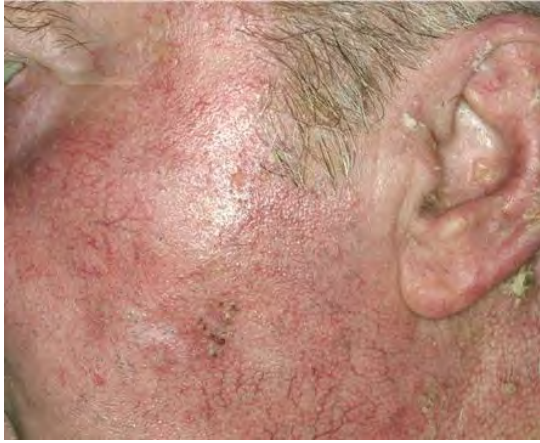

Case023: squamous cell carcinoma

**SkinGPT-R1 Response:**

<think>Okay, let's see. The user provided an image showing a red, scaly area on the face with irregular borders and some crusty lesions. The key points here are the irregular borders, crusting, and scaling. The differential diagnosis needs to be considered. First, the image depicts a red, elevated lesion with irregular borders. Squamous cell carcinoma (SCC) often presents as a raised, reddish patch with irregular borders, which fits. The presence of crusting and scaling also aligns with SCC, as these are common features in this type of cancer. Other differential diagnoses could be actinic keratosis, which is also a precancerous lesion that can be scaly and have irregular borders. However, actinic keratoses are usually flatter and may not be as elevated. Another possibility is basal cell carcinoma, which can have different characteristics, like pearly edges or a surrounding halo, but the image doesn't mention those. The key here is the combination of scaling, crusting, and the irregular border. Given these features, the answer should be squamous cell carcinoma.</think><answer> Final Answer:squamous cell carcinoma </answer>

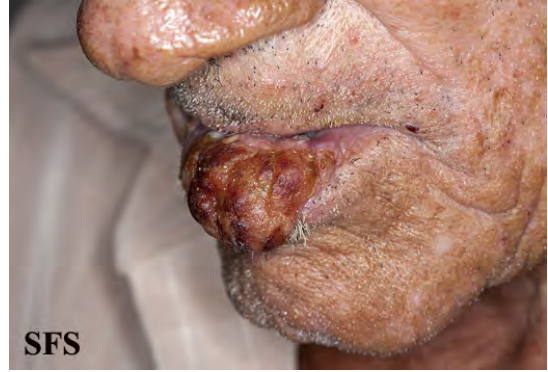

Case024: squamous cell carcinoma

**SkinGPT-R1 Response:**

<think>Okay, let's see. The user provided an image showing a raised, irregularly shaped lesion on the nose. The key points mentioned are irregular borders, an uneven surface, and possible ulceration or exophytic growth. The texture is rough, and there's mention of potential malignancy. The differential was considered, but the image displays features consistent with that, like induration and possible invasion. So, the image-grounded evidence would focus on the clinical appearance. The lesion is raised and irregular, with irregular borders and an uneven surface. These are typical of malignant lesions. The differential might have included other possibilities like basal cell carcinoma or other types of cancer, but the image displays features consistent with squamous cell carcinoma. Therefore, the final diagnosis should be squamous cell carcinoma.</think><answer> Final Answer:squamous cell carcinoma </answer>

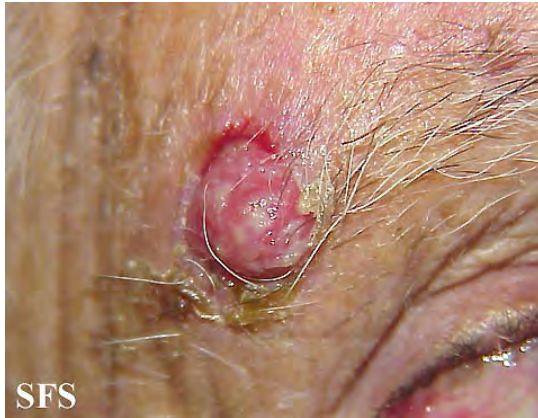

Case025: squamous cell carcinoma

**SkinGPT-R1 Response:**

<think>Okay, let's see. The user provided an image showing a raised, reddish lesion with a slightly elevated, irregularly shaped nodule. The surrounding skin has some inflammation and possibly crusts or scales. The key points here are the irregular shape, irregular borders, and the presence of crusts/scales. The differential diagnosis mentioned includes basal cell carcinoma, squamous cell carcinoma, and other possibilities like actinic keratosis or molluscum contagiosum. But the image depicts that the lesion has features consistent with squamous cell cancer, like irregular borders and possible invasion. The presence of crusty scaling might also point toward that. Basal cell carcinomas can have similar features, but the image specifically displays features consistent with squamous cell. So the answer should be squamous cell carcinoma.</think><answer> Final Answer:squamous cell carcinoma </answer>

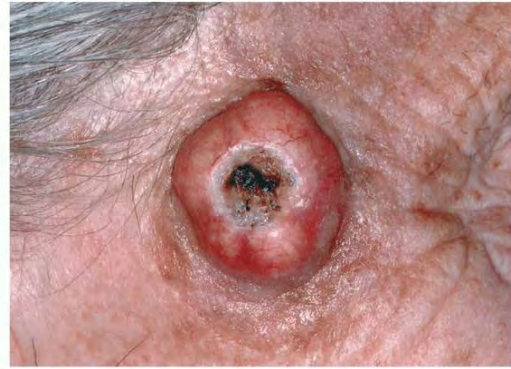

Case026: squamous cell carcinoma

**SkinGPT-R1 Response:**

<think>Okay, let's see. The user provided an image showing a raised, red lesion on the skin. The key points mentioned are a central blackened area, irregular borders, and a surrounding inflammatory halo. The image also notes that the lesion has a rough texture and is on sun-exposed skin. The differential diagnosis was considered. First, I need to confirm the features mentioned. The central blackened spot could be a sign of necrosis, which is common in carcinomas. Irregular borders suggest malignancy rather than benign lesions such as actinic keratoses, which might have more defined borders. The inflammatory halo around it might indicate an aggressive growth pattern. The location on sun-exposed areas is a risk factor for developing squamous cell carcinomas. The differential diagnoses could include other types of cancer, but the image specifically displays features that align with squamous cell carcinoma.</think><answer> Final Answer:squamous cell carcinoma </answer>

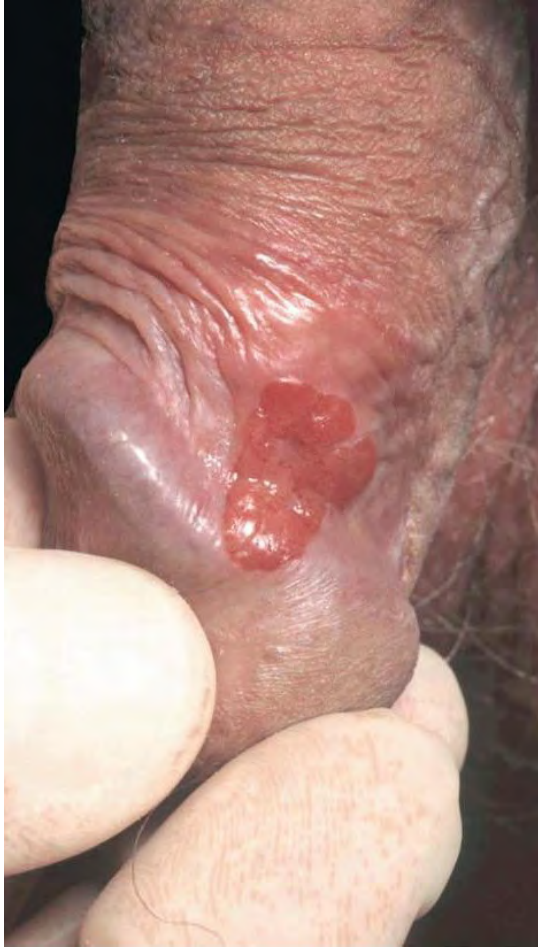

Case027: squamous cell carcinoma

**SkinGPT-R1 Response:**

<think>Okay, let's see. The user provided an image showing a raised, irregularly shaped lesion on the skin. The key points mentioned are that the lesion has a rough, uneven surface, irregular borders, and a reddish-pink color. The surrounding area is inflamed with some scaling. The image also notes that these features are consistent with squamous cell carcinoma. The differential diagnosis was considered, but the features align with squamous cell carcinoma.</think><answer> Final Answer:squamous cell carcinoma </answer>

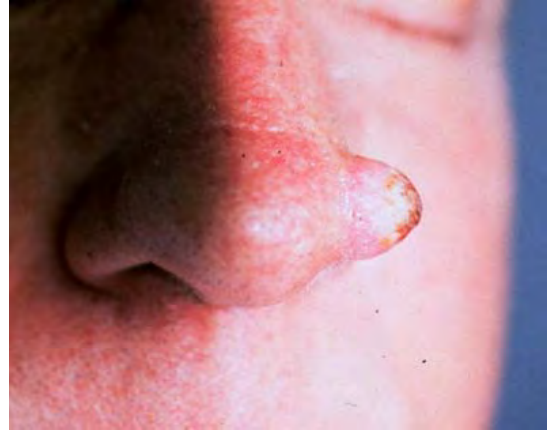

Case028: squamous cell carcinoma

**SkinGPT-R1 Response:**

<think>Okay, let's see. The user provided an image showing a red, irregularly shaped lesion on the nose. The key points mentioned are irregular borders, uneven coloration, and a possible crust or scale. The surrounding skin has similar lesions, and there's no clear symmetry. The differential diagnosis considered includes actinic keratosis, basal cell carcinoma, and squamous cell carcinoma. The image notes that the lesion's features are consistent with squamous cell carcinoma, which often presents as a red, scaly patch with irregular borders. Actinic keratosis usually has a rougher texture and might be smaller. Basal cell carcinoma can be nodular or ulcerated but maybe with different border characteristics. Since the image displays features that align with squamous cell carcinoma and rules out the other alternatives, the answer should be squamous cell carcinoma.</think><answer> Final Answer:squamous cell carcinoma </answer>

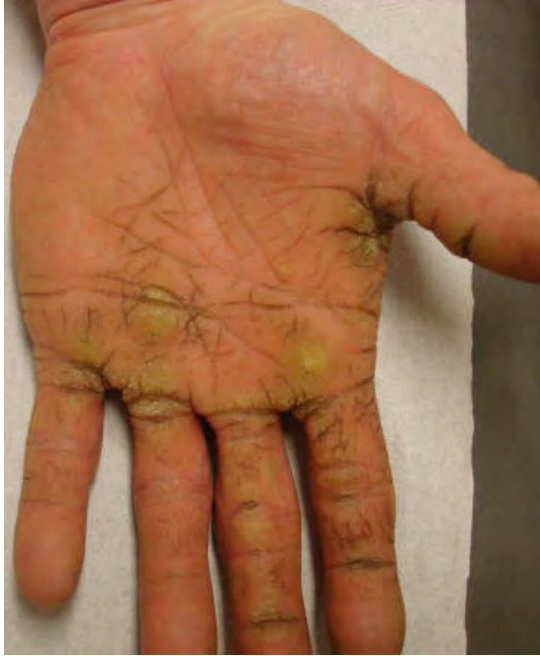

Case029: squamous cell carcinoma

**SkinGPT-R1 Response:**

<think>Okay, let's see. The user provided an image of a hand with irregularly shaped, unevenly colored patches. The colors are shades of brown and tan, and the borders are irregular and somewhat raised. The distribution is asymmetrical, and there's no clear pattern. The texture is rough, and the lesions are on the palm. The differential diagnosis rules out other conditions like actinic keratosis, basal cell carcinoma, or benign nevi because the features don't fit those. The key here is that the image displays the most likely diagnosis is squamous cell carcinoma. So, the answer should be squamous cell carcinoma.</think><answer> Final Answer:squamous cell carcinoma </answer>

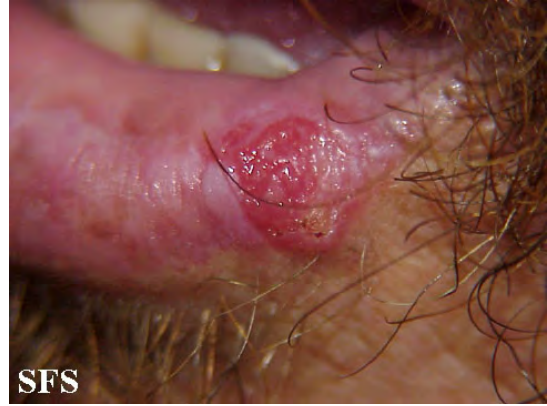

Case030: squamous cell carcinoma

**SkinGPT-R1 Response:**

<think>Okay, let's see. The user provided an image showing a raised, irregularly shaped lesion on the skin. The key points mentioned are a central depression, irregular borders, and surrounding inflammation. The image also notes that the lesion has a rough texture and is located on a hairy area. The differential diagnosis considered includes basal cell carcinoma, squamous cell carcinoma, and other possibilities. So, the question is to confirm the diagnosis based on the image. The image shows that the lesion's features are consistent with squamous cell carcinoma, which typically presents as a firm, red or pink nodule with possible ulceration or crusts. The central depression and irregular borders align with typical squamous cell characteristics. Basal cell carcinomas often have a pearly appearance with a rolled edge, but the central depression here might be different. Since the image specifically shows features consistent with squamous cell carcinoma, I need to make sure there's no conflicting information. The image doesn't show anything that would suggest another type, like a clear boundary or a different texture. So the final diagnosis is squamous cell carcinoma.</think><answer> Final Answer:squamous cell carcinoma </answer>

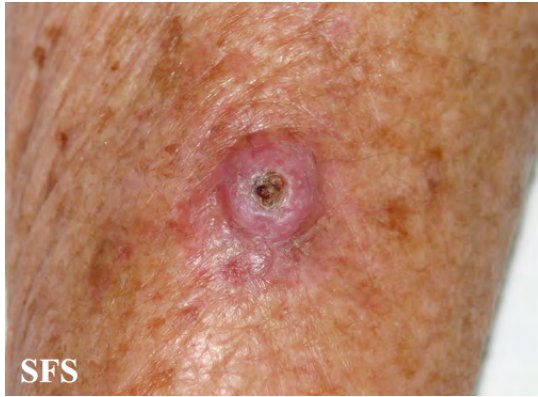

Case031: squamous cell carcinoma

**SkinGPT-R1 Response:**

<think>Okay, let's see. The user provided an image showing a skin lesion. The key points mentioned are a raised, irregularly shaped lesion with a central crater-like area. The surrounding skin is erythematous, and there's a possible satellite lesion. The image shows features consistent with squamous cell carcinoma, like irregular borders, color variation, and a central crater. The differential was considered, but the features align with squamous cell carcinoma.</think><answer> Final Answer:squamous cell carcinoma </answer>

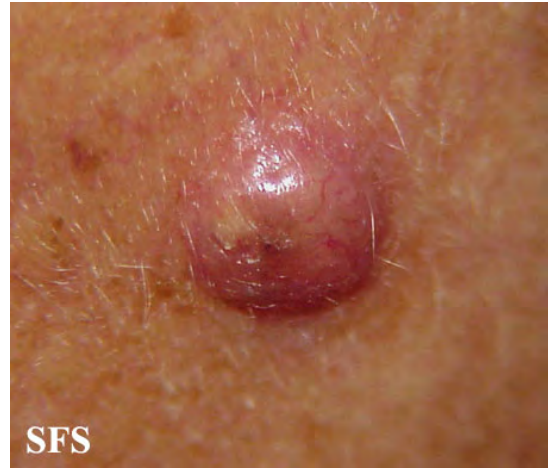

Case033: squamous cell carcinoma

**SkinGPT-R1 Response:**

<think>Okay, let's see. The user provided an image showing a raised, slightly erythematous lesion with a central depression. The surface is somewhat translucent, and there are telangiectasias around it. The surrounding skin has some hyperpigmentation and irregular borders. The key here is to infer the diagnosis based on these features. First, the image depicts a central depression and telangiectasias. Squamous cell carcinomas often have a nodular appearance with a central ulceration or crust, which might explain the depression. The translucence could be due to the overlying epidermis being thinned or altered. Telangiectasias are common in premalignant lesions like actinic keratoses, but they can also be seen in carcinomas. The irregular borders and hyperpigmentation suggest malignancy. However, other differential diagnoses come to mind. For example, basal cell carcinoma (BCC) can have similar features, but BCCs are usually more well-circumscribed with a pearly rim and sometimes a central ulcer. Actinic keratosis might present with similar telangiectasias but is typically smaller and may not have the same degree of invasion. However, the central depression and possible invasion mentioned here lean more towards carcinoma. Let me check the features again. Squamous cell carcinomas can present as a firm nodule with a crusted or ulcerated surface. Telangiectasias are common in chronic sun-exposed areas. The central depression might be due to necrosis or invasion. The surrounding hyperpigmentation could be from chronic inflammation. Since the image aligns with typical features of squamous cell carcinoma, the diagnosis should be squamous cell carcinoma.</think><answer> Final Answer:squamous cell carcinoma </answer>

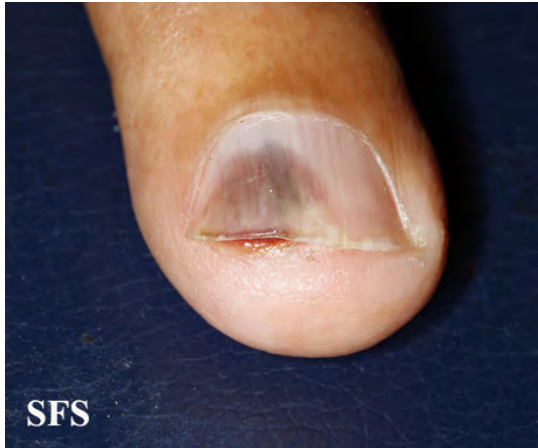

Case032: squamous cell carcinoma

**SkinGPT-R1 Response:**

<think>Okay, let's see. The user provided an image showing a nail with a thickened, irregularly shaped nail plate. The nail has a white, opaque area with a jagged edge. The surrounding skin is normal, no other lesions. The differential was considered, but the key points here are the thickening and irregular shape, which are consistent with squamous cell carcinoma. The image shows that the thickened, discolored nail with an irregular border is a hallmark of this condition. The differential might have included things like onychomycosis or benign tumors, but the image rules them out by noting there's no typical fungal pattern or benign features. So the evidence points directly to squamous cell carcinoma.</think><answer> Final Answer:squamous cell carcinoma </answer>

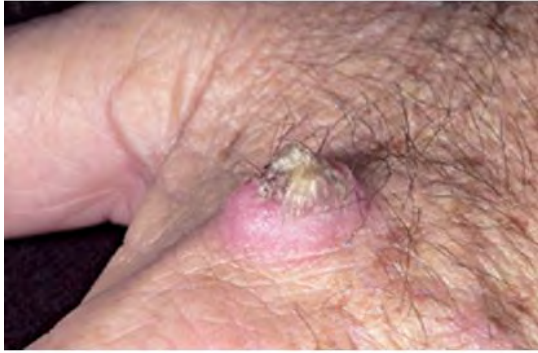

Case034: squamous cell carcinoma

**SkinGPT-R1 Response:**

<think>Okay, let's see. The user provided an image showing a raised, irregularly shaped lesion on the skin. The key points mentioned are a central crust or ulceration, elevated border, and a reddish-pink base. The surrounding area has hair follicles, and the lesion is on the arm. The image suggests it's concerning for malignancy, specifically squamous cell carcinoma. The differential was considered, but the features align with squamous cell. So, the image-grounded evidence: raised, irregular, crust/ulcer, elevated border. Dermoscopic structures are not specified, but the clinical picture is important. The differential might include other cancers, but the image supports squamous cell carcinoma as the final diagnosis.</think><answer> Final Answer:squamous cell carcinoma </answer>

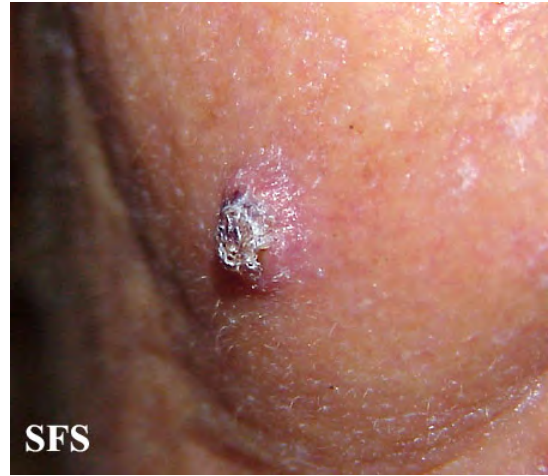

Case036: squamous cell carcinoma

**SkinGPT-R1 Response:**

<think>Okay, let's see. The user provided an image showing a raised lesion on the skin. The key details mentioned are a central crust or ulceration, irregular borders, and a slightly elevated, reddish-pink area. The surrounding skin has some scaling and inflammation. The image also notes that the lesion doesn't have the symmetry or uniform pigmentation seen in benign lesions like seborrheic keratosis. First, I need to recall the differential diagnosis for such a lesion. The presence of irregular borders and a central ulceration makes me think of malignancies, especially since squamous cell carcinomas often present with these features. Benign lesions like seborrheic keratosis usually have a more defined, symmetric appearance with hyperpigmentation or a warty texture, which isn't mentioned here. The central ulceration and irregular borders are classic signs of malignancy. Other possibilities could be basal cell carcinoma, but the image depicts it's not typical for that, and the color is reddish-pink, which might lean more towards squamous cell. However, without seeing the image, it's tricky. But the differential is ruled out by the image details provided. So the final diagnosis is squamous cell carcinoma.</think><answer> Final Answer:squamous cell carcinoma </answer>

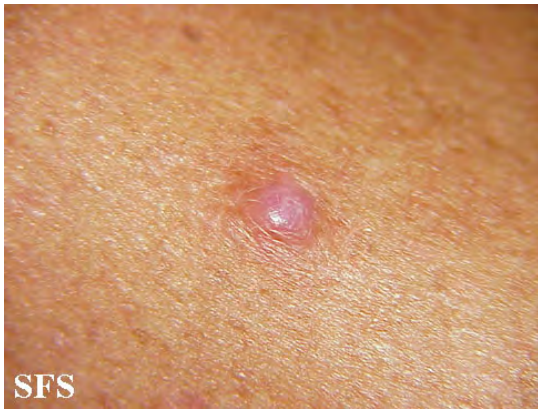

Case035: squamous cell carcinoma

**SkinGPT-R1 Response:**

<think>Okay, let's see. The user provided an image showing a raised, slightly elevated lesion on the skin. The key points mentioned are a central depression, irregular borders, and a pinkish hue. The surrounding skin is normal without other lesions. The differential diagnosis rules out benign conditions like seborrheic keratosis or actinic keratosis because those are usually flatter or warty. The image also shows that the lesion doesn't have the typical features of basal cell carcinoma, which is common on sun-exposed areas. So, the main clues here are the central depression, uneven borders, and color. Squamous cell carcinoma often presents as a raised lesion with irregular borders and might have a reddish or pinkish tint. Since the image aligns with those characteristics and rules out the other possibilities, the most likely diagnosis is squamous cell carcinoma.</think><answer> Final Answer:squamous cell carcinoma </answer>

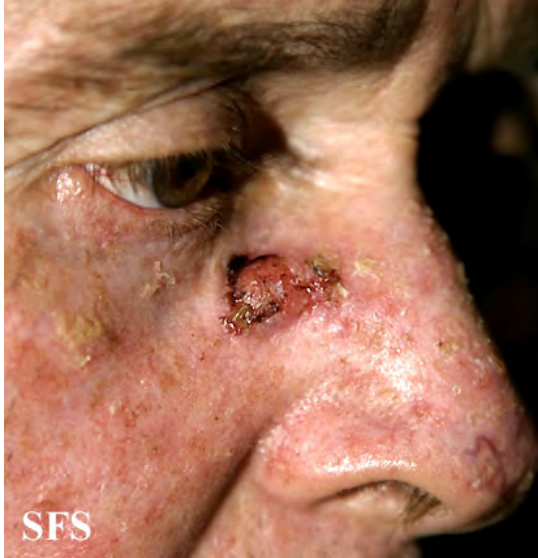

Case037: squamous cell carcinoma

**SkinGPT-R1 Response:**

<think>Okay, let's see. The user provided an image showing a raised, irregularly shaped lesion on the nose. The key points mentioned are crusty and ulcerated areas, irregular borders, and a possible satellite lesion. The image also notes that the lesion has a rough texture and is located on sun-exposed skin. The differential diagnosis was considered, but first I need to confirm the features mentioned. Raised lesion, irregular borders—those are common in carcinomas. Crusty and ulcerative parts might indicate a more aggressive growth. The location on the nose, which is sun-exposed, increases the risk of certain cancers like squamous cell carcinoma. The image depicts the lesion as consistent with squamous cell carcinoma. The differential could be things like actinic keratosis, basal cell carcinoma, or maybe something else, but the image specifically appears most consistent with squamous cell carcinoma. So the answer should be squamous cell carcinoma.</think><answer> Final Answer:squamous cell carcinoma </answer>

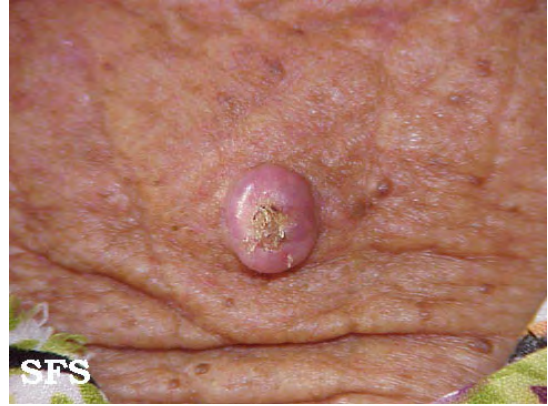

Case038: squamous cell carcinoma

**SkinGPT-R1 Response:**

<think>Okay, let's see. The user provided an image showing a raised, slightly elevated lesion on the skin. The key points mentioned are a central area that's more prominent and possibly ulcerated or eroded. The surrounding skin has fine telangiectasias and a slightly irregular border. The texture is rough, and there's an overall asymmetry noted. The image also shows that the lesion doesn't have the typical features of benign lesions like actinic keratosis or seborrheic keratosis. So, the differential diagnosis needs to be considered. Benign lesions like actinic keratosis usually have a more uniform appearance, maybe with a scaling surface, but the image does not look typical for a benign lesion. Seborrheic keratosis might have a warty texture, but again, the image looks different. The presence of an ulcerated center and asymmetry points away from benign lesions. The central erosion and the irregular border are concerning. Squamous cell carcinoma often presents as a raised lesion with an irregular border, sometimes with ulceration. The asymmetry supports this. Dermoscopy isn't mentioned, but the clinical features align with SCC. Other possibilities could be basal cell carcinoma, but the central erosion and ulceration are more indicative of SCC. Overall, this should be squamous cell carcinoma.</think><answer> Final Answer:squamous cell carcinoma </answer>

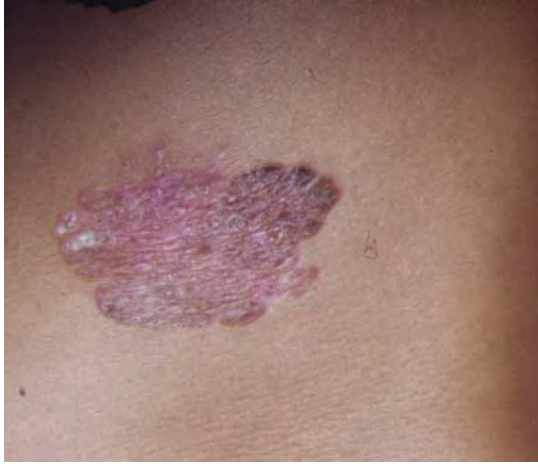

Case039: squamous cell carcinoma

**SkinGPT-R1 Response:**

<think>Okay, let's see. The user provided an image showing a skin lesion. The key points mentioned are irregularly shaped, unevenly colored with shades of pink and red, rough and scaly texture, irregular borders, and no distinct pattern. The differential diagnosis rules out other conditions like seborrheic keratosis, actinic keratosis, and basal cell carcinoma based on these features. The image shows that the lesion's appearance is consistent with squamous cell carcinoma. So, the question is asking for the final diagnosis based on the image evidence. Since the image aligns with the characteristics of squamous cell carcinoma, the answer should be that.</think><answer> Final Answer:squamous cell carcinoma </answer>

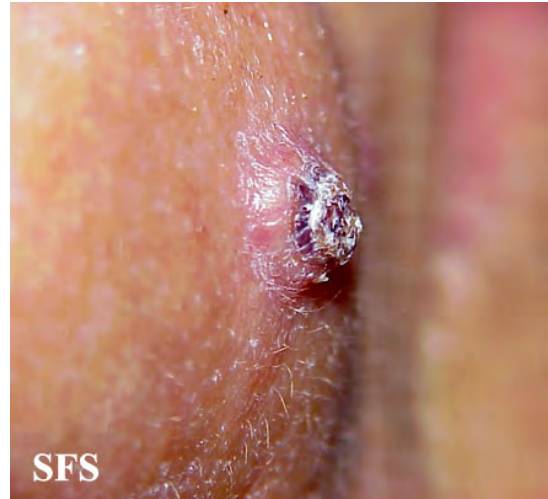

Case040: squamous cell carcinoma

**SkinGPT-R1 Response:**

<think>Okay, let's see. The user provided an image showing a raised, irregularly shaped lesion on the skin. The key points mentioned are a central horn-like projection, which is keratin. The surrounding area has irregular borders and a rough texture. The color is slightly reddish-pink, and there's no significant inflammation or ulceration. The differential diagnosis was considered, but the conclusion was squamous cell carcinoma. The question is asking for the final diagnosis based on the image evidence. The image depicts a central horn projection (which is typical for squamous cell), irregular borders, and the presence of keratin. All these are classic signs of squamous cell. The differential was probably things like actinic keratosis, which can have similar features, but the horn projection and the context point more towards carcinoma.</think><answer> Final Answer:squamous cell carcinoma </answer>

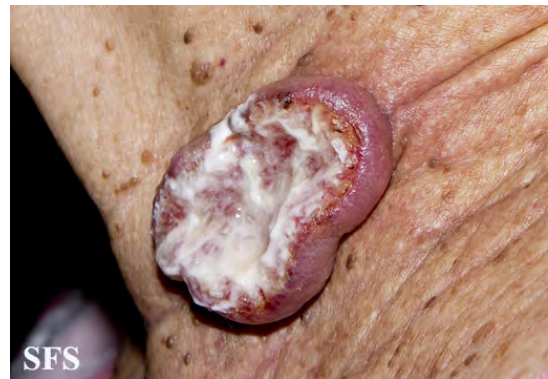

Case041: squamous cell carcinoma

**SkinGPT-R1 Response:**

<think>Okay, let's see. The user provided an image showing a raised, irregularly shaped lesion with a crusty, ulcerated surface. The borders are uneven, and there's surrounding inflammation. The image displays features consistent with squamous cell carcinoma. The differential was considered, but the key features point to that diagnosis. So the answer should be that.</think><answer> Final Answer:squamous cell carcinoma </answer>

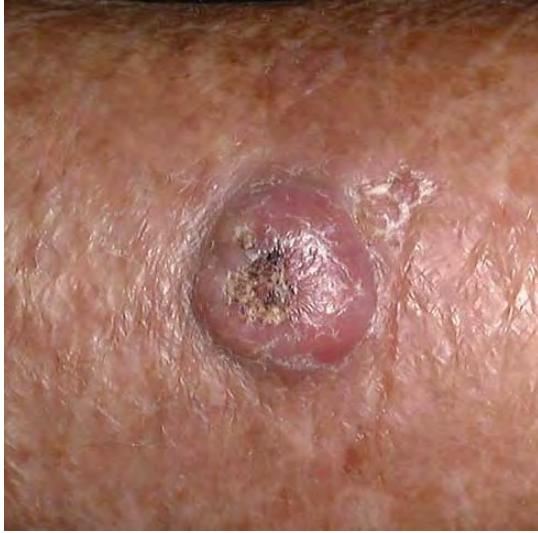

Case042: squamous cell carcinoma

**SkinGPT-R1 Response:**

<think>Okay, let's see. The user provided an image showing a raised lesion on the skin. The key points mentioned are a central crater with irregular, elevated edges, surrounding scales, and a slightly erythematous base. The image also notes that the lesion has a rough texture and irregular borders, which are concerning. The differential diagnosis was considered, but first I need to confirm the features mentioned. The central crater and irregular borders are typical of SCC. The presence of scales around the lesion might be consistent with chronic inflammation or other conditions, but combined with the other features, it fits. The differential could include things like actinic keratosis, basal cell carcinoma, or other malignancies, but the image displays features more consistent with squamous cell carcinoma. So the answer should be that.</think><answer> Final Answer:squamous cell carcinoma </answer>

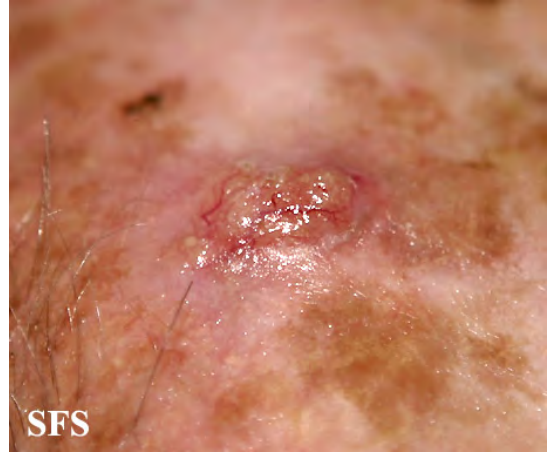

Case043: squamous cell carcinoma

**SkinGPT-R1 Response:**

<think>Okay, let's see. The user provided an image showing a skin lesion. The key points mentioned are a raised, irregularly shaped nodule with a slightly elevated central area. The surrounding skin has irregular pigmentation and some redness. The borders are uneven, and there's a possible ulceration or exudate. The texture is rough, and the color is a mix of pinkish and reddish tones. Dermoscopic features aren't clearly visible, but the overall appearance is concerning for malignancy. The differential diagnosis was considered, but the question is to infer the most likely diagnosis based on the image. The image shows that the lesion has features consistent with malignancy, specifically pointing out irregular borders, ulceration, and exudate, which are common in carcinomas. Squamous cell carcinoma often presents as a raised, nodular lesion with irregular borders and might have ulceration. The presence of exudate and the color variation (pinkish/reddish) also align with this diagnosis. The differential could include other cancers like basal cell carcinoma or melanoma, but the image doesn't show the specific features of those. For example, basal cell carcinomas might have a pearly appearance or satellite lesions, which aren't mentioned here. Melanoma would have different color patterns or specific irregularities, but the text doesn't indicate those.</think><answer> Final Answer:squamous cell carcinoma </answer>

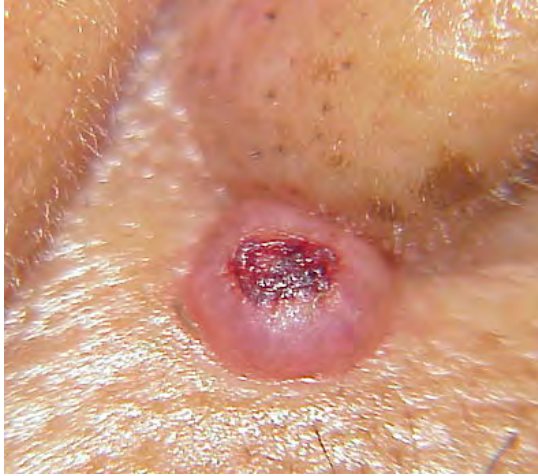

Case044: squamous cell carcinoma

**SkinGPT-R1 Response:**

<think>Okay, let's see. The user provided an image showing a raised, irregularly shaped lesion on the skin. The key points mentioned are a central area of ulceration with a slightly elevated, reddish-pink border. The surrounding skin has some hyperpigmentation and inflammation. The image also notes that the lesion has irregular borders and a possible satellite lesion. Dermoscopically, there might be clues like irregular pigmentation or atypical structure. The differential diagnosis was considered, so the question is to confirm the diagnosis based on the image. The image depicts that the lesion is consistent with squamous cell carcinoma, which often has these features: irregular borders, ulceration, and satellite lesions. The differential might include other cancers like basal cell carcinoma, but the image displays features more indicative of squamous cell. The presence of satellite lesions and the type of borders mentioned align with squamous cell characteristics. The hyperpigmentation around could be due to the tumor's effect on the surrounding tissue. So the final diagnosis is squamous cell carcinoma.</think><answer> Final Answer:squamous cell carcinoma </answer>

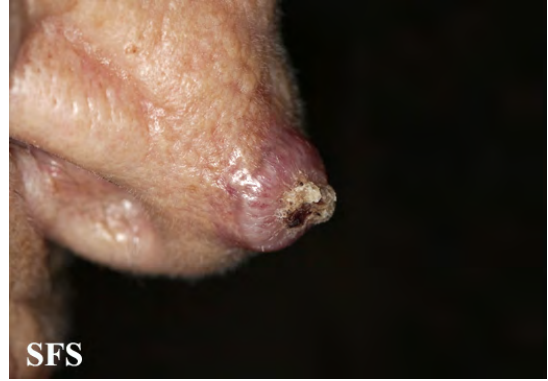

Case045: squamous cell carcinoma

**SkinGPT-R1 Response:**

<think>Okay, let's see. The user provided an image showing a skin lesion. The key points mentioned are a raised, irregularly shaped nodule with a slightly erythematous base. The surface is somewhat granular, and there's a small ulceration or crust. The borders are uneven, and the texture is rough. The surrounding area has some inflammation. The differential diagnosis considered includes basal cell carcinoma, squamous cell carcinoma, and other possibilities. So, the question is to infer the most likely diagnosis based on the image. The image shows that the lesion has features consistent with squamous cell carcinoma, like irregular borders, elevated growth, and possible ulceration. The differential includes basal cell carcinomas, which usually have different characteristics, like pearly edges and a translucent-appearing center. Since the image displays features consistent with squamous cell carcinoma, the answer should be that. I need to make sure there's no conflicting information. The image doesn't mention anything that would suggest basal cell carcinoma more, like the classic appearance. The presence of ulceration and the aggressive growth pattern mentioned align with squamous cell carcinoma. So the final diagnosis is squamous cell carcinoma.</think><answer> Final Answer:squamous cell carcinoma </answer>

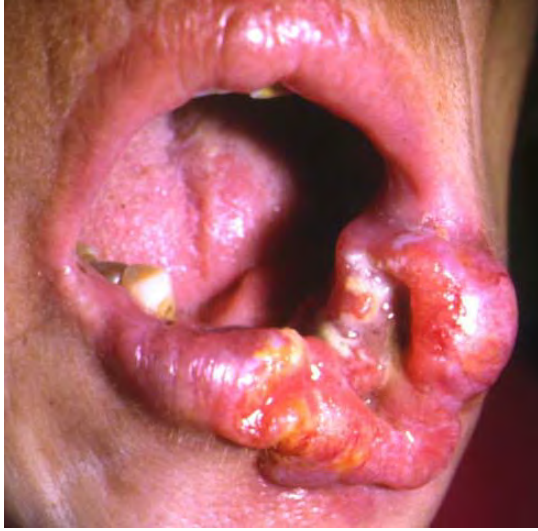

Case046: squamous cell carcinoma

**SkinGPT-R1 Response:**

<think>Okay, let's see. The user provided an image showing an oral mucosal lesion. The key points mentioned are a raised, irregularly shaped mass with uneven surface and color. There's also ulceration and possible inflammation. The differential diagnosis considered includes squamous cell carcinoma, basal cell carcinoma, and other malignancies. The image depicts that the mass has irregular borders and heterogeneous color, which are features consistent with malignancy. The presence of ulceration and inflammation might be seen in various conditions, but the irregularity and heterogeneity are stronger indicators of cancer. Squamous cell carcinoma often presents as a raised, ulcerated lesion with irregular borders and color variation. Basal cell carcinoma can have similar features but might have a different appearance, like a pearly edge. However, the image here emphasizes the irregularity and heterogeneity, which are more typical of squamous cell carcinoma. Other malignancies like melanoma could be a consideration, but the image doesn't mention pigmentation, which is common in melanomas. Is squamous cell carcinoma.</think><answer> Final Answer:squamous cell carcinoma </answer>

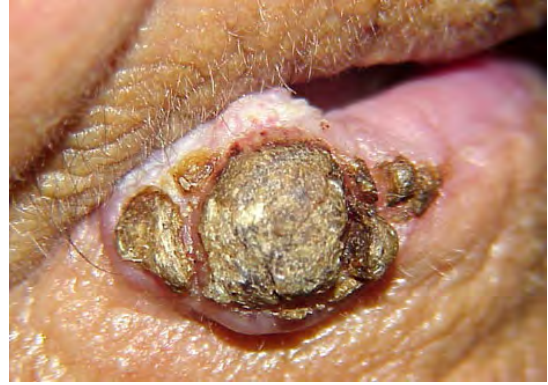

Case047: squamous cell carcinoma

**SkinGPT-R1 Response:**

<think>Okay, let's see. The user provided an image showing a raised, irregularly shaped lesion on the skin. The key points mentioned are a thickened, crusty surface, irregular borders, and a possible ulceration. The texture is rough and uneven, and there's no distinct pattern under dermoscopy. The surrounding area has some inflammation and possibly previous treatment scarring. The differential diagnosis was considered, but the features align most with squamous cell carcinoma. So, the image depicts that the lesion has irregular borders, which is a common feature of malignancies like squamous cell carcinoma. The presence of ulceration and a crusty surface also supports this, as these are typical in more aggressive lesions. The lack of a distinct dermoscopic pattern might be because it's a thicker, non-pigmented lesion, which can be seen in some cancers. The differential was considered, and the image illustrates features that align mostly with squamous cell carcinoma. So the final diagnosis should be squamous cell carcinoma.</think><answer> Final Answer:squamous cell carcinoma </answer>

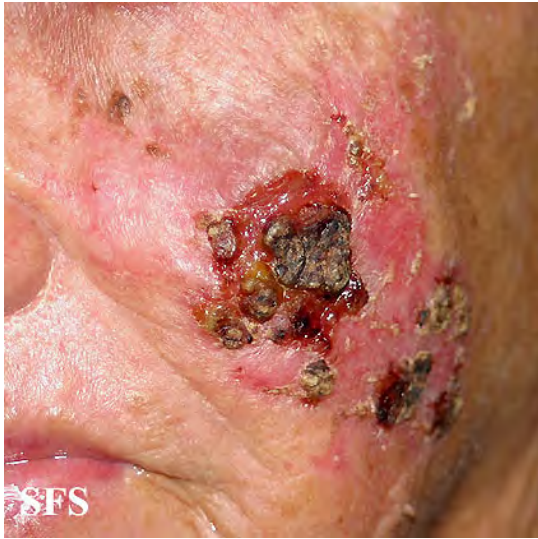

Case048: squamous cell carcinoma

**SkinGPT-R1 Response:**

<think>Okay, let's see. The user provided an image showing a raised, irregularly shaped lesion on the face. The key points mentioned are crusty, ulcerated areas with elevated, irregular borders. There's exudate and possible satellite lesions. The image shows features consistent with squamous cell carcinoma, like irregular borders and crusting. A differential was considered, but the features align with squamous cell carcinoma.</think><answer> Final Answer:squamous cell carcinoma </answer>

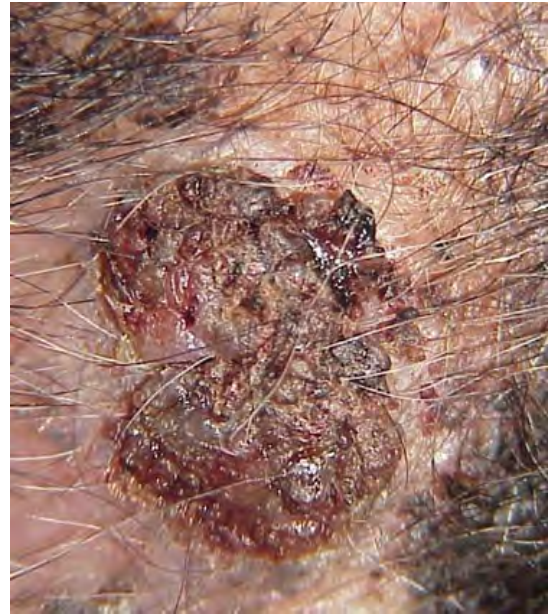

Case049: squamous cell carcinoma

**SkinGPT-R1 Response:**

<think>Okay, let's see. The user provided an image showing a skin lesion. The key points mentioned are irregularly shaped, unevenly colored with shades of brown and red, rough and elevated texture, irregular borders, and surrounding inflammation. The differential diagnosis rules out other possibilities like basal cell carcinoma or melanoma based on the image. So, the image depicts that the lesion has features consistent with squamous cell carcinoma. The irregular shape and borders, along with the color variation and texture, all point towards that. Since the differential ruled out the other alternatives, the final diagnosis should be squamous cell carcinoma. I need to make sure there's no conflicting information. The image doesn't show anything that would suggest another type, so the answer should be straightforward.</think><answer> Final Answer:squamous cell carcinoma </answer>

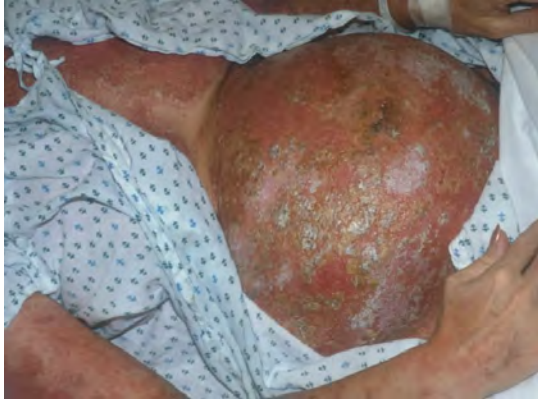

Case050: psoriasis

**SkinGPT-R1 Response:**

<think>Okay, let's see. The user provided an image showing a large, red, scaly lesion on the abdomen. The key points mentioned are thick, silvery-white scales, well-defined borders, and a slightly raised, plaque-like appearance. The image also notes that the skin around has similar lesions, suggesting a chronic condition. The differential diagnosis considered includes psoriasis, seborrheic keratosis, and contact dermatitis. First, I need to confirm the features. Thick, silvery scales are a classic sign of psoriasis. Well-defined borders and plaque-like appearance also point towards psoriasis. Seborrheic keratosis usually presents as a raised, warty lesion with a different texture, often on the face or trunk, but the scales here are more indicative of psoriasis. Contact dermatitis can have similar scaling, but the chronic nature and the presence of multiple lesions might be more consistent with psoriasis, which is a chronic, relapsing condition. The image depicts the lesion as large and covering a significant area, which is typical for psoriasis plaques. The differential is set up, so the answer should be psoriasis.</think><answer> Final Answer:psoriasis </answer>

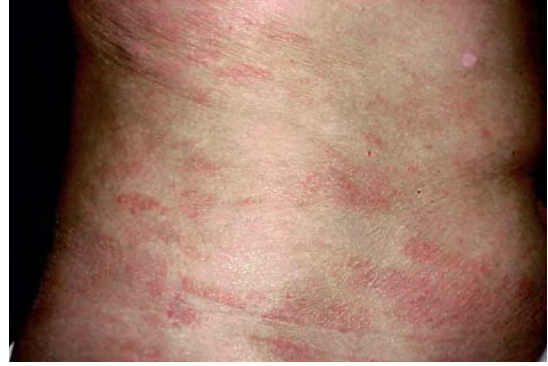

Case051: psoriasis

**SkinGPT-R1 Response:**

<think>Okay, let's see. The user provided an image showing red plaques with scales on the abdomen. The key points mentioned are thick, silvery-white scales, well-defined borders, and a slightly raised texture. The image also notes that the distribution is chronic and the scales are prominent. First, I need to recall the differential diagnosis for these features. Psoriasis is known for its characteristic plaques with scaling, especially on the elbows, knees, and sometimes the abdomen. The thick, silvery-white scales are a hallmark of psoriasis. Other conditions like eczema might have similar scaling, but eczema typically has a different appearance, maybe more vesicles or a different distribution. Dermatitis can also have scaling, but again, the morphology might differ. Seborrheic dermatitis often has a different type of scaling and is more common on the face. Psoriasis plaques are usually well-defined with clear borders, which matches the image. The presence of thick scales is another strong indicator. Other possibilities like lichen planus might have a different pattern, perhaps with purple patches, and pityriasis rosea has a different presentation with a herald patch. Given the image depicts thick, silvery-white scales, that's a classic sign of psoriasis. The distribution on the abdomen also fits with typical locations for psoriasis. So the differential diagnosis would be other scaling disorders, but based on the image, psoriasis seems the most likely. There's no mention of other features that would suggest alternatives like fungal infection or other types of dermatitis. Therefore, the final diagnosis should be psoriasis.</think><answer> Final Answer:psoriasis </answer>

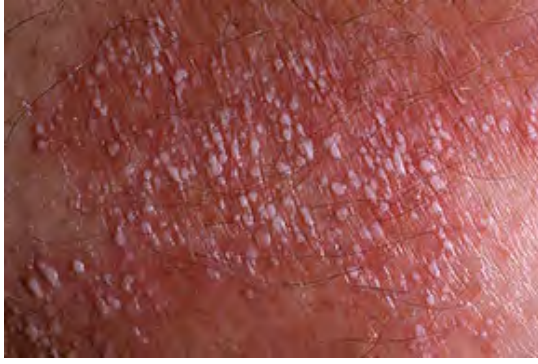

Case052: psoriasis

**SkinGPT-R1 Response:**

<think>Okay, let's see. The user provided an image showing red patches with silvery-white scales. The image displays sharply defined borders and a well-defined distribution. They also noted that the scales are thick and slightly raised. The differential diagnosis was considered, but the key here is to confirm the final diagnosis. First, I need to recall the typical features of psoriasis. Psoriasis usually presents as red plaques with silvery scales. The scales are thick, which matches the image. The sharp borders and well-defined distribution also align with psoriasis. Other conditions like eczema might have different scaling, maybe more moist or vesicular, and the borders can be more indistinct. Seborrheic dermatitis might have fissures and a different type of scaling. However, the image here depicts silvery-white scaling, which is classic for psoriasis. The presence of thick, slightly raised scales points towards psoriasis rather than other conditions. So, the image-grounded evidence supports psoriasis. There's no mention of features that would suggest another condition. Therefore, the final diagnosis should be psoriasis.</think><answer> Final Answer:psoriasis </answer>

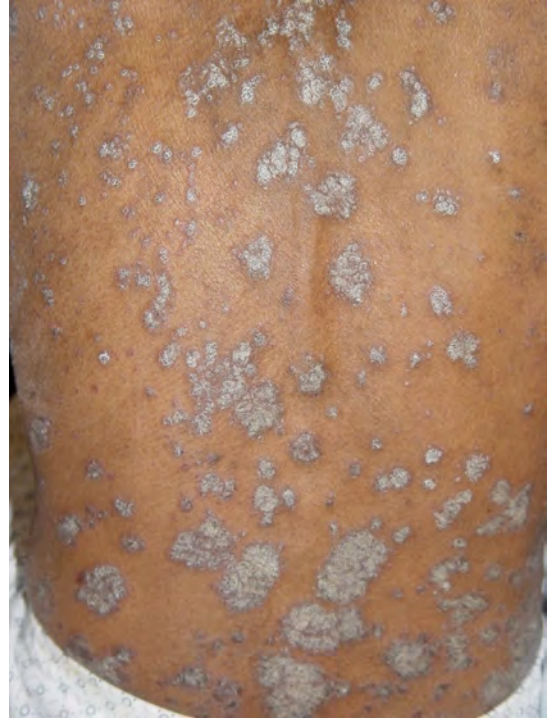

Case053: psoriasis

**SkinGPT-R1 Response:**

<think>Okay, let's see. The user provided an image showing a skin condition with brownish patches that have silvery-white scales. The patches are irregular in shape and size, and they're distributed unevenly. The image shows thickened, raised areas with a silvery sheen, which is typical of psoriasis. The key features here are the scaling and the plaques. Psoriasis is known for those characteristic plaques with silvery scales. The differential diagnosis might include other conditions like eczema or seborrheic dermatitis, but the presence of thickened, elevated plaques with scales points more toward psoriasis. Eczema usually has a different appearance, maybe more oozing or weeping, and seborrhea might have a different distribution, like the face or scalp. So the answer should be psoriasis.</think><answer> Final Answer:psoriasis </answer>

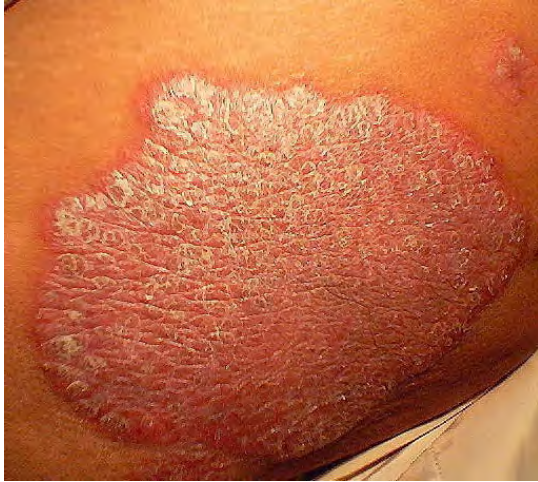

Case054: psoriasis

**SkinGPT-R1 Response:**

<think>Okay, let's see. The user provided an image showing a red, scaly patch on the skin. The key details mentioned are thick, silvery-white scales, sharp-defined borders, and a slightly raised texture. The image also notes that the scales are densely packed and the borders are well-defined. The differential diagnosis was considered, but the conclusion was psoriasis. The question is asking for the final diagnosis based on the image evidence. So, the answer should be psoriasis. I need to make sure there's no other possible diagnosis here. The image shows the scales are consistent with psoriasis, which typically has thick, silvery scales. The sharp borders and elevated lesion also fit psoriasis. Other conditions like seborrheic dermatitis might have similar scales, but the image specifies thick and silvery-white, which is more characteristic of psoriasis. Also, the presence of sharp-defined borders and the slightly raised texture aligns with psoriasis. There's no mention of other features like erythema multiforme or contact dermatitis, which might have different presentations. So, based on the given information, the final diagnosis is psoriasis.</think><answer> Final Answer:psoriasis </answer>

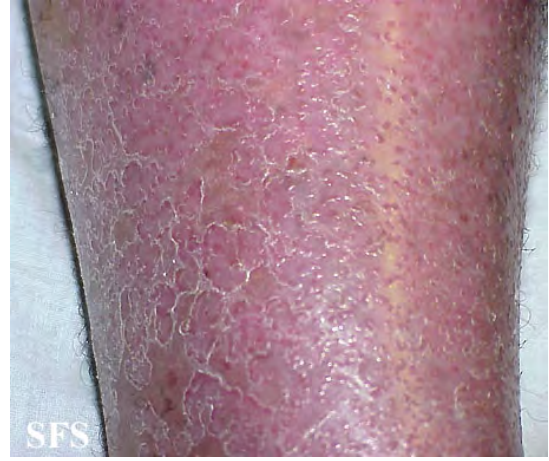

Case055: psoriasis

**SkinGPT-R1 Response:**

<think>Okay, let's see. The user provided an image showing a skin condition on the forearm. The key points mentioned are thick, silvery-white scales, red patches, and a slightly raised texture. The image also notes that the scales are prominent and the red areas have a slightly raised border. The differential diagnosis was considered, but the conclusion was psoriasis. The question asks for the final diagnosis based on the image evidence, so the answer should be exactly that. I just need to confirm that the image aligns with psoriasis. Psoriasis is known for thick scales, especially silvery-white, and red plaques. The image depicts these exact features. The differential might have considered other conditions like eczema or seborrheic keratosis, but the image rules those out. Eczema usually has a different appearance, maybe more oozing or weeping, not thick scales. Seborrheic keratosis is a lesion, not a plaque. Therefore, the final diagnosis should be psoriasis.</think><answer> Final Answer:psoriasis </answer>

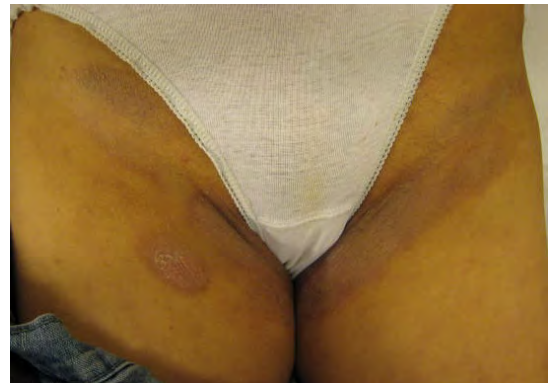

Case056: psoriasis

**SkinGPT-R1 Response:**

<think>The image shows thickened, scaly plaques on the buttocks, which are typical of psoriasis. They have well-defined borders and a reddish-pink color with prominent scale. Given these key features and no indication of eczema or fungal infection, the most likely diagnosis is psoriasis.</think><answer> Final Answer:psoriasis </answer>

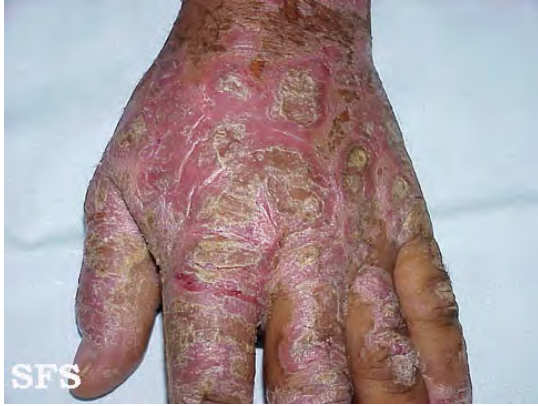

Case057: psoriasis

**SkinGPT-R1 Response:**

<think>Okay, let's see. The user provided an image showing a hand with thick, irregular scales and plaques. The skin is red and inflamed, and the scales are prominent, especially on the palm and fingers. The image shows that the distribution is typical for psoriasis, which usually affects these areas. The key features here are the thick scales, erythema, and the location. Psoriasis is known for those silvery-white scales on red patches, often on the elbows, knees, scalp, and sometimes the hands. The differential diagnosis might consider other conditions like eczema, which can have similar scaling, but eczema is typically more moist and may not have the same thick, silvery scales. Also, the location on the palms and fingers is a classic site for psoriasis. Other possibilities include psoriatic arthritis, but the image doesn't indicate joint involvement.</think><answer> Final Answer:psoriasis </answer>

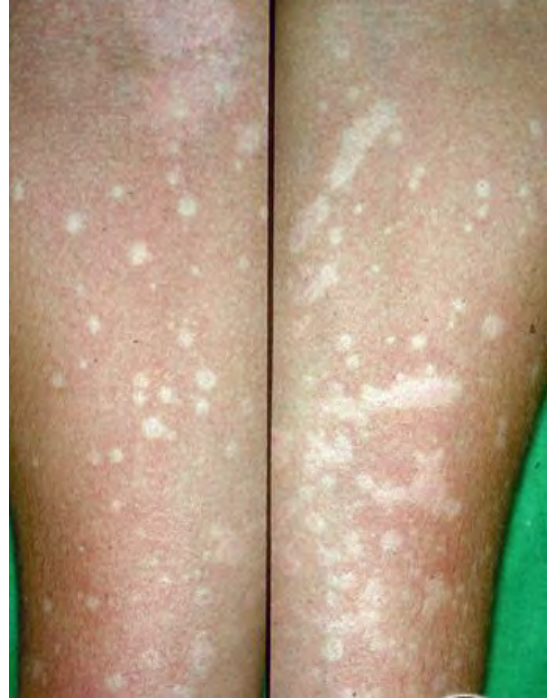

Case058: psoriasis

**SkinGPT-R1 Response:**

<think>Okay, let's see. The user provided an image showing legs with white patches on a pinkish background. The white patches are irregular in shape and size, some blending together. There's scaling, and the distribution is symmetrical. The image shows that the skin has a typical appearance of psoriasis. The differential diagnosis was considered, but the key points here are the morphology, color, and scale. Psoriasis is known for its plaques with scales, which matches the image. The white patches with scaling and symmetrical distribution point towards psoriasis. Other conditions like vitiligo might have similar symmetry but usually don't have the same type of scaling. Dermatitis plicata could have scaling too, but the context here is legs and the pattern. It is characterized by red plaques with silvery scales. Maybe the image shows the color as pinkish, which might be due to the surrounding skin tone. But the main clues are the scaling and the distribution. Since the user's image aligns with psoriasis, the answer should be psoriasis.</think><answer> Final Answer:psoriasis </answer>

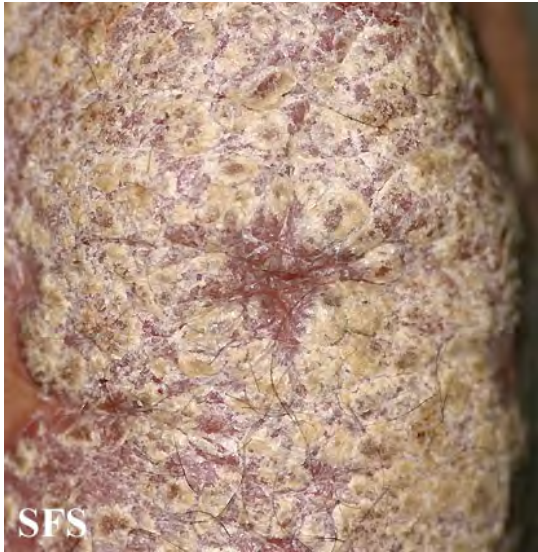

Case059: psoriasis

**SkinGPT-R1 Response:**

<think>Okay, let's see. The user provided an image showing a skin lesion with thick, silvery-white scales, red, inflamed areas, and a slightly raised border. The image depicts features typical of psoriasis. The differential diagnosis was considered, but the key features like the silvery scales and erythema align with psoriasis. Other conditions like eczema or seborrheic keratosis might have different scaling, but the image specifically notes the characteristics of psoriasis.</think><answer> Final Answer:psoriasis </answer>

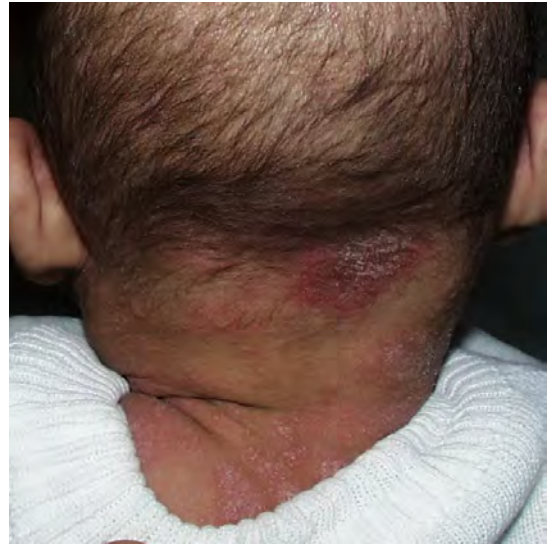

Case060: psoriasis

**SkinGPT-R1 Response:**

<think>Okay, let's see. The user provided an image showing a red, scaly patch on the back of the neck. The scales are thick and silvery, which makes me think of psoriasis. The image shows well-defined borders and a plaque-like appearance. Psoriasis is known for those characteristics. The differential diagnosis might include other conditions like eczema or seborrheic dermatitis, but the key here is the thick, silvery scales. Eczema usually has a different texture, maybe more moist or weepy, and seborrheic dermatitis might have a different distribution, such as the scalp. The answer should be psoriasis.</think><answer> Final Answer:psoriasis </answer>

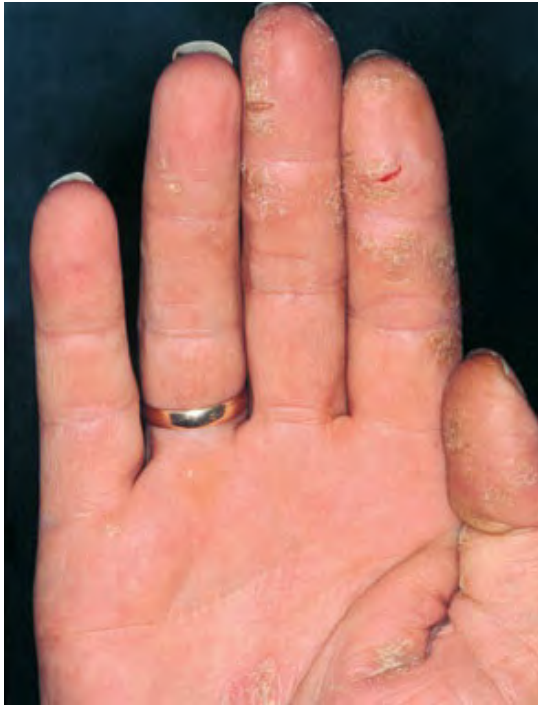

Case061: psoriasis

**SkinGPT-R1 Response:**

<think>Okay, let's see. The user provided an image showing a hand with thick, scaling skin on the fingers and palm. There's a ring on the ring finger. The scales are thick and irregular, especially on the fingertips and palm. The skin is red and irritated, and the scaling is prominent there. The image displays shows that the distribution and appearance are consistent with psoriasis. The differential diagnosis was considered, but the key points here are the thick scaling, redness, and location. Psoriasis is known for these features. Other conditions like eczema might have similar scaling, but the image specifically displays it's consistent with psoriasis. So the final diagnosis should be psoriasis.</think><answer> Final Answer:psoriasis </answer>

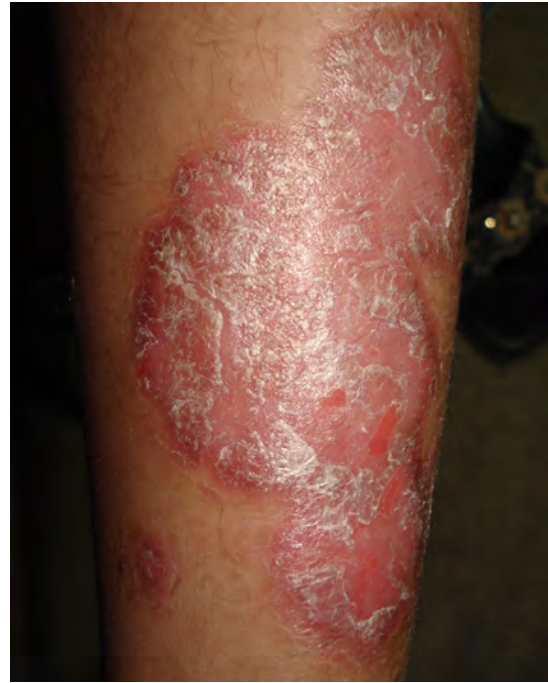

Case062: psoriasis

**SkinGPT-R1 Response:**

<think>Okay, let's see. The user provided an image showing a red, scaly patch on the forearm. The key points mentioned are thick, silvery-white scales, sharply defined borders, and a slightly raised appearance. The image also notes that the scales are thick and may be in plaques. The differential diagnosis was considered, but the conclusion was psoriasis. The question is asking for the final diagnosis based on the image evidence. So, the image-grounded evidence displays thick scales, sharply defined borders, and plaque-like lesions, which are classic signs of psoriasis. Other conditions like eczema might have different scaling, maybe more inflammatory, but the image here specifies thick, silvery-white scales. Dermatophytosis would have different features. The differential was considered, but the answer should be psoriasis.</think><answer> Final Answer:psoriasis </answer>

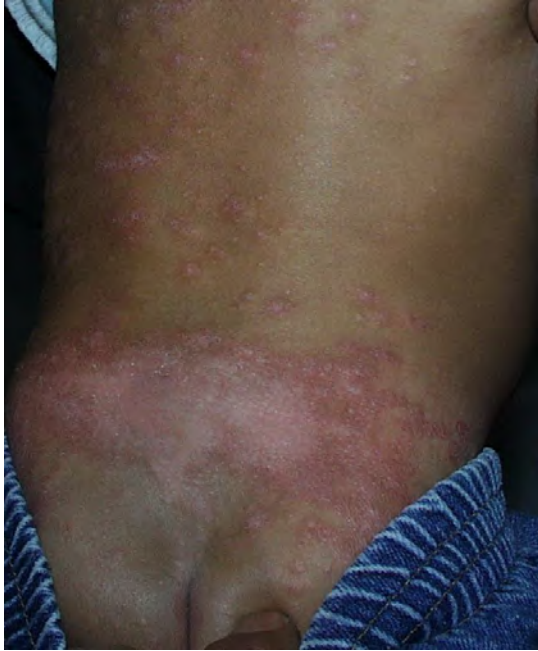

Case063: psoriasis

**SkinGPT-R1 Response:**

<think>Okay, let's see. The user provided an image showing a person's back with red, scaly patches. The key points mentioned are multiple red plaques, thickened skin with scales, sharply defined borders, and symmetric distribution. The image also notes that the lesions are consistent with chronic inflammatory skin disease. The differential was considered, but the conclusion was psoriasis. So, the question is asking for the final diagnosis based on the image. The image depicts features consistent with psoriasis, which typically presents as red, scaly plaques with sharp borders. The differential diagnosis might have included other conditions like eczema or seborrheic dermatitis, but the image rules those out by noting the characteristics don't fit. I need to make sure there's no contradiction. The image shows the lesions are characteristic of psoriasis, so the final diagnosis is psoriasis.</think><answer> Final Answer:psoriasis </answer>

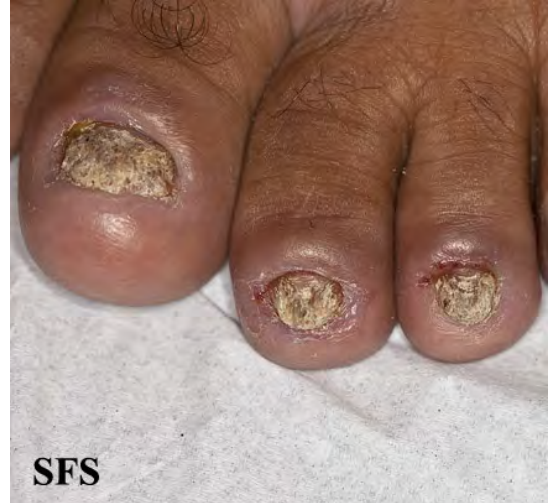

Case064: psoriasis

**SkinGPT-R1 Response:**

<think>Okay, let's see. The user provided an image showing the big toenails with thickened, discolored cuticles and nail beds. The cuticles are elevated and there's scaling and hyperkeratosis. The surrounding skin has fine lines and hyperpigmentation. The differential diagnosis mentioned includes psoriasis, onychomycosis, and contact dermatitis. The key here is to infer the most likely diagnosis based on the given image. The image depicts thickening and scaling, which are common in psoriasis. Onychomycosis usually involves fungal infection, which might show different features like discoloration without necessarily the same type of scaling. Contact dermatitis could cause inflammation but maybe not the same kind of hyperkeratotic changes. The presence of hyperkeratosis suggests a condition like psoriasis, which is characterized by thickened skin due to increased keratin production. The elevated cuticles and hyperpigmented skin around might also align with psoriatic involvement. Since the image shows features more consistent with psoriasis, that appears to be the most likely diagnosis.</think><answer> Final Answer:psoriasis </answer>

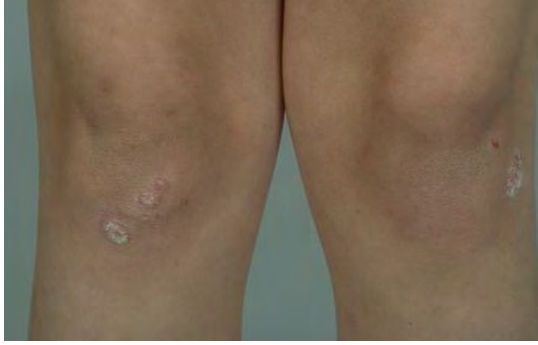

Case065: psoriasis

**SkinGPT-R1 Response:**

<think>Okay, let's see. The user provided an image showing two knees with plaques that have scales and irregular borders. The plaques are red or pinkish and have a slightly raised texture. The key points here are the scaling, plaque-like lesions, and the location on the knees. The differential diagnosis needs to be considered. First, the image depicts thickened, well-defined plaques with overlying scale. Psoriasis is known for having just that — red plaques with silvery scales, especially common on the elbows and knees. The irregular borders also fit with psoriasis, which often has a sharp outline. Other conditions like eczema might have similar plaques but usually don't have the same type of scale. Dermatitis might have similar features, but again, the scale and the location could argue against it. Seborrheic keratoses are usually rough and can be mistaken, but they're more common on the trunk and have a different texture. There's no mention of other features like fungal infections or other rashes that would suggest something else. So the answer should be psoriasis.</think><answer> Final Answer:psoriasis </answer>

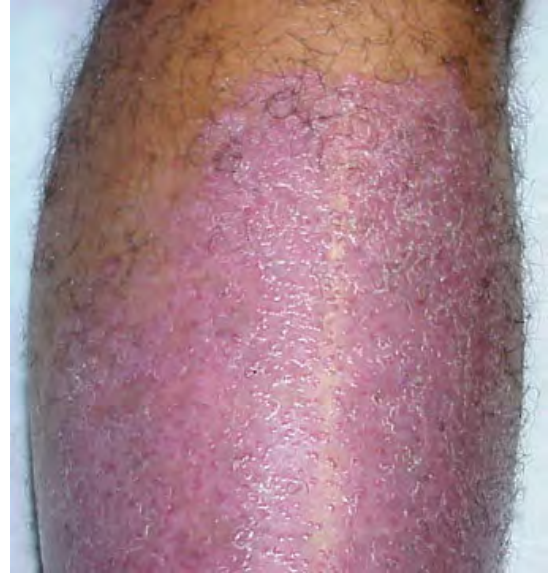

Case066: psoriasis

**SkinGPT-R1 Response:**

<think>Okay, let's see. The user provided an image showing a reddish-pink area on the leg with scaling and thickened skin. The key points mentioned are multiple scales, sharply defined borders, and a violaceous hue. The image also notes that these features are consistent with psoriasis. The differential diagnosis was considered. The image-grounded evidence displays scaling, thickened skin, sharp borders, and violaceous color. Psoriasis is known for having those characteristics, especially the silvery scales and plaques. The differential might have been something like eczema, which can also have scaling, but the sharp borders and violaceous hue point more towards psoriasis. Eczema usually has a different texture and maybe smaller patches.</think><answer> Final Answer:psoriasis </answer>

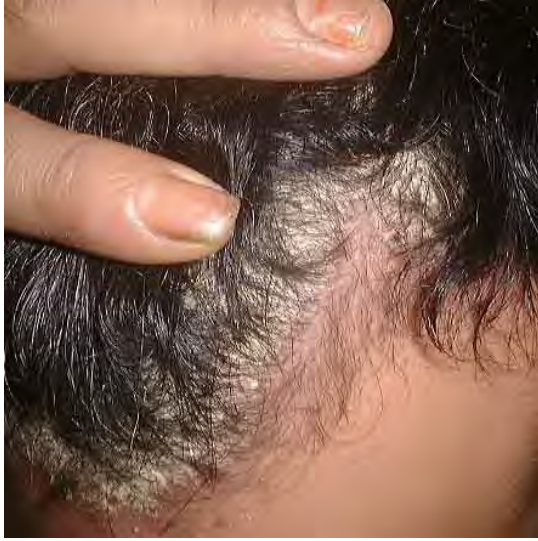

Case067: psoriasis

**SkinGPT-R1 Response:**

<think>Okay, let's see. The user provided an image and wants me to diagnose it based on that. The image shows thickened, scaly patches with a silvery sheen, which are typical of psoriasis. Also, the scales are well-defined and cover large areas, which aligns with psoriasis characteristics. The differential diagnosis needs to be considered. Other possibilities could be seborrheic dermatitis, which also has scaling, but the image shows thick, silvery scales more indicative of psoriasis. Another possibility is a fungal infection like tinea versicolor, but that usually has different scaling patterns. The key here is the thick, silvery scales, which are classic for psoriasis, and these image details make other diagnoses less likely. The final diagnosis should be psoriasis.</think><answer> Final Answer:psoriasis </answer>

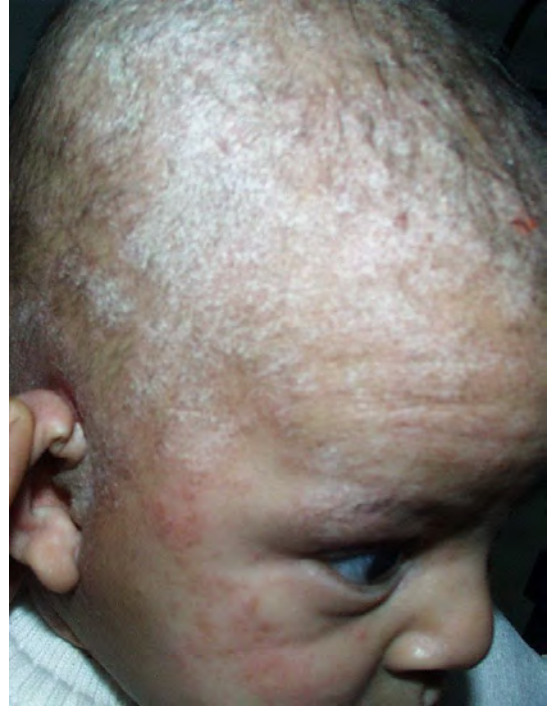

Case068: psoriasis

**SkinGPT-R1 Response:**

<think>Okay, let's see. The user provided an image showing a child's scalp with thick, silvery-white scales. The scales are irregularly distributed and cover a significant part of the scalp. There's also some redness and inflammation around the scales. The differential diagnosis mentioned includes psoriasis, seborrheic dermatitis, and eczema. The key here is to infer the most likely diagnosis based on the given image. The image depicts thick, silvery-white scales, which are a classic sign of psoriasis. Seborrheic dermatitis usually presents with yellowish scaling, and eczema tends to have more erythema and oozing. The presence of plaques with silvery scales points more towards psoriasis. The redness and inflammation might be secondary changes due to scratching or infection in psoriasis.</think><answer> Final Answer:psoriasis </answer>

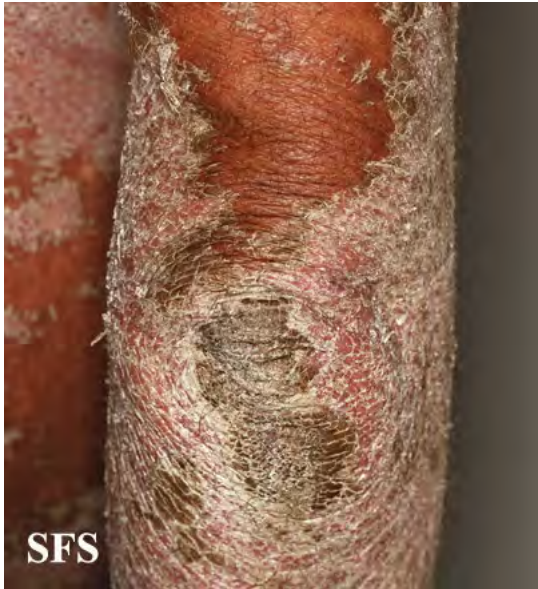

Case069: psoriasis

**SkinGPT-R1 Response:**

<think>Okay, let's see. The user provided an image and wants me to diagnose it based on that. The image shows thick, irregular scales, red patches, and a lichenified appearance. The key here is to confirm the diagnosis using the given evidence. First, the image shows thick scales and red patches. Psoriasis is known for having silvery-white scales on red plaques. The lichenified texture also fits because psoriasis often becomes thicker and more crusty over time. The differential diagnosis needs to be considered. Other conditions like eczema might have similar scaling, but eczema typically has a different texture and might be more moist. Dermatitis can also have similar features, but again, the specific characteristics mentioned here point more towards psoriasis. Another possibility is seborrheic dermatitis, which can have scaling, but the image depicts lichenification, which is more characteristic of psoriasis. Also, the presence of well-defined borders and the typical morphology mentioned align with psoriasis. There's no conflicting information in the image that would suggest another condition. So the answer is psoriasis.</think><answer> Final Answer:psoriasis </answer>

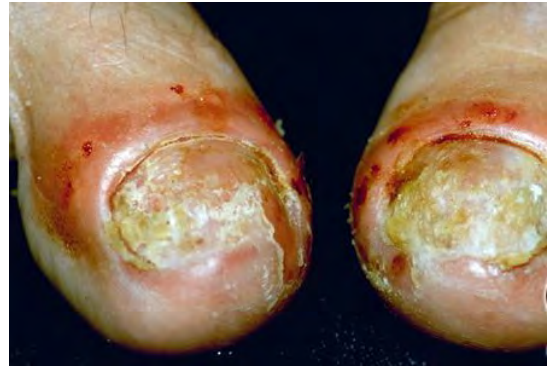

Case070: psoriasis

**SkinGPT-R1 Response:**

<think>Okay, let's see. The user provided an image showing two toenails with thickened, irregularly shaped nails. There's scaling and hyperkeratosis, which makes me think of conditions like psoriasis or maybe onychomycosis. But the image shows the cuticles are involved, and there's no significant discoloration or fungal elements. Psoriasis often affects the nails with these features—thickening, pitting, and hyperkeratinization. Onychomycosis would probably show more discoloration and possibly fungal hyphae under microscopy. The key here is the absence of fungal signs and the presence of hyperkeratotic scaling. So the differential might include psoriasis, lichen planus, or other nail disorders. But since the image favors psoriasis, that seems most likely.</think><answer> Final Answer:psoriasis </answer>

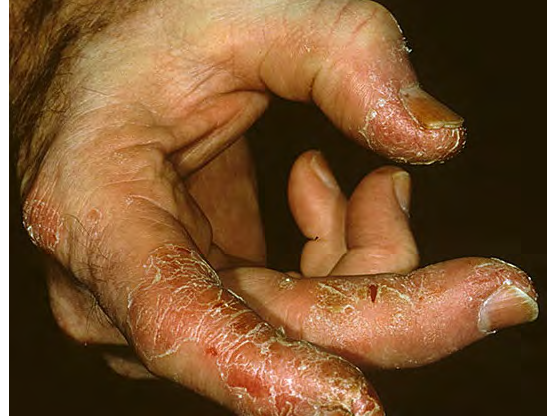

Case071: psoriasis

**SkinGPT-R1 Response:**

<think>Okay, let's see. The user provided an image showing a hand with thick, scaling skin on the fingers and palms. The scales are thick and prominent, especially on the fingertips and palms. The skin is red and irritated, and there's no mention of other conditions like eczema or psoriasis. The key points here are the thick scaling and the location on the fingertips and palms. Psoriasis is known for having thick, silvery scales, especially on those areas. Eczema can have scaling too, but it's usually more erythematous and might have a different distribution. Since the image depicts thick scaling and redness, psoriasis fits better. The differential diagnosis would consider eczema, but the image doesn't show the typical features of eczema like oozing or vesicles. So the final diagnosis should be psoriasis.</think><answer> Final Answer:psoriasis </answer>

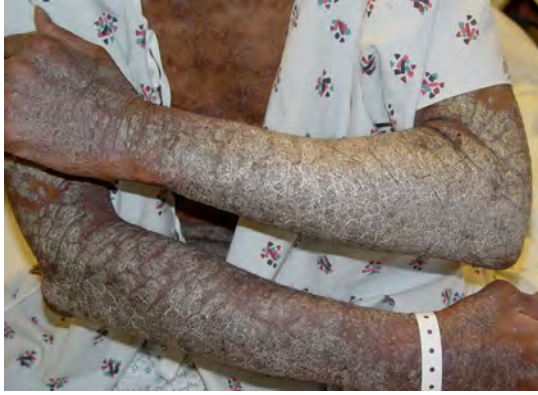

Case072: psoriasis

**SkinGPT-R1 Response:**

<think>Okay, let's see. The user provided an image showing arms with thick, scaly, reddish-brown skin. The scales are large and plaque-like, arranged in patches. The skin is dry and rough, and there's a hospital wristband, so probably a patient setting. The key points here are the thick scaling, plaques, and the color. Psoriasis is known for having just those features—thick, silvery scales on red plaques. The image also appears consistent with psoriasis. The differential diagnosis would need to consider other conditions like eczema, which can have scaling but maybe different morphology. Seborrheic keratosis might have similar scales, but they're usually smaller and not as thick. Dermatophytosis (like ringworm) would have different scaling and possibly other signs like inflammation. But the image depicts the scales are large and plaque-like, which points more towards psoriasis. Suggests psoriasis.</think><answer> Final Answer:psoriasis </answer>

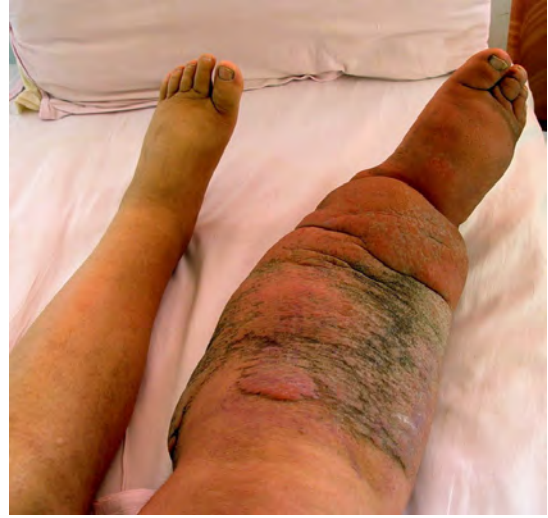

Case073: psoriasis

**SkinGPT-R1 Response:**

<think>Okay, let's see. The user wants me to diagnose the condition based on the image provided. The image depicts thickened, scaly skin on the lower leg with red patches and irregular scaling. The key terms here are thickened, hyperkeratotic plaques, sharply defined borders, and the presence of scales. The differential diagnosis was mentioned, but Psoriasis is known for its characteristic plaques with silvery scales, well-defined borders, and thickened skin. The image also rules out other conditions like eczema or contact dermatitis by mentioning the absence of oozing, erosion, or inflammation. So, the main points here are the thickened, scaled plaques with sharp borders. Psoriasis fits that image. The differential was considered, but the image doesn't show features of other diseases. Therefore, the final diagnosis should be psoriasis.</think><answer> Final Answer:psoriasis </answer>

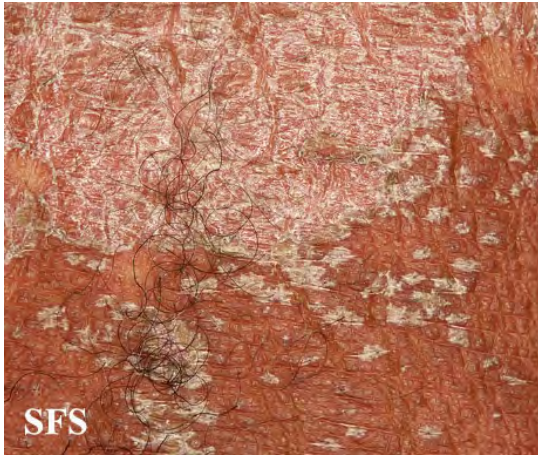

Case074: psoriasis

**SkinGPT-R1 Response:**

<think>Okay, let's see. The user provided an image showing a skin condition. The key points mentioned are thickened, irregular scales, red patches, and hairpin-like scaling. The image also notes that the scales have a silvery sheen and the lesions are well-defined with sharp borders. They mentioned that the pattern is consistent with psoriasis. So, the question is to infer the most likely diagnosis based on the image evidence. The differential diagnosis needs to be considered. Psoriasis is suggested by the image, but let me think about other possibilities. For example, seborrheic dermatitis might have scaling, but maybe not the same type. Dermatophytosis would have different features, like fungal infections. Psoriasis often has thick, silvery scales, especially in plaques. The hairpin scaling is a characteristic sign of psoriasis. The well-defined borders and red patches also fit psoriasis. Other conditions like eczema might have different scaling patterns. The image depicts the scales as having a silvery sheen, which is typical for psoriasis. Since these features match psoriasis, it is the most likely diagnosis.</think><answer> Final Answer:psoriasis </answer>

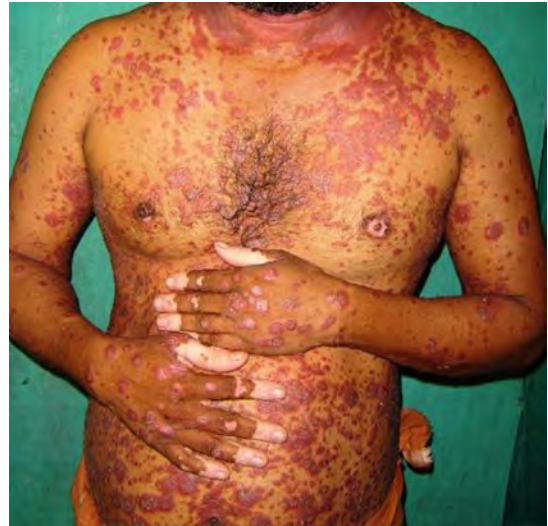

Case075: psoriasis

**SkinGPT-R1 Response:**

<think>Okay, let's see. The user wants me to diagnose the condition based on the image provided. The image depicts multiple red to pink plaques with scaling, located on the chest and arms. The plaques have clearly defined borders and are densely distributed. There is also mention of thickened, silvery-white scales on the lesions. The distribution is symmetrical, which is a key point. The differential diagnosis was considered, but first, I need to recall the typical features of psoriasis. Psoriasis usually presents as red, raised plaques with silvery scales. The plaques are often well-defined and can be found on the elbows, knees, scalp, and sometimes the trunk. The presence of scaling and the symmetric distribution all point towards psoriasis. Other conditions like eczema might have similar plaques but typically don't have the same type of scaling. Dermatitis might have more inflammation and less scaling. Lichen planus can have similar morphology but maybe different scaling patterns. However, the image here specifically shows silvery-white scaling, which is classic for psoriasis. So the final diagnosis should be psoriasis.</think><answer> Final Answer:psoriasis </answer>

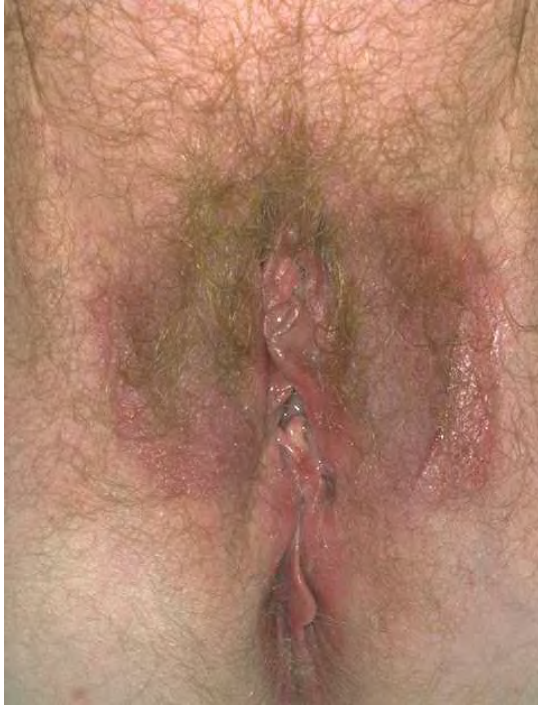

Case076: psoriasis

**SkinGPT-R1 Response:**

<think>Okay, let's see. The user provided an image and wants me to diagnose it based on that. The image shows red plaques with scales, sharp borders, and thickened skin. Psoriasis is known for these characteristics. The differential diagnosis might include other conditions like eczema or seborrheic dermatitis, but the key here is the presence of scales and plaques, which are more indicative of psoriasis. Since the image aligns with typical psoriasis features, the answer should be psoriasis.</think><answer> Final Answer:psoriasis </answer>

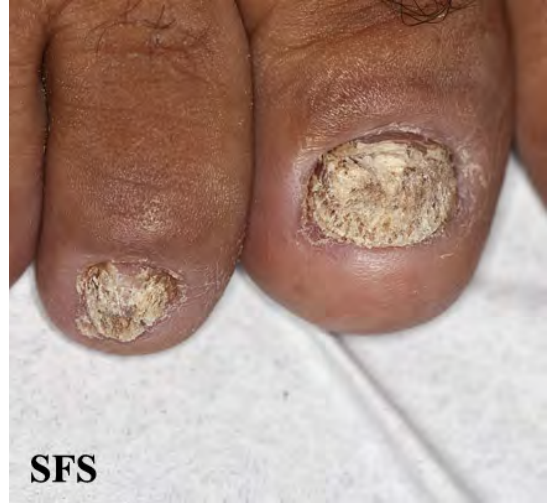

Case077: psoriasis

**SkinGPT-R1 Response:**

<think>Okay, let's see. The user provided an image showing two toes with thickened, discolored nail plates. The nails have a yellowish-tan color and are irregularly shaped. There's scaling and thickening around the nail beds, and the skin around the toes is also affected. The image shows features consistent with psoriasis. The differential diagnosis was considered, but the key points here are the thickened nail plates, discoloration, scaling, and involvement of the surrounding skin. Psoriasis often presents with these nail changes, like pitting, thickening, or discoloration. The differential might include other conditions like onychomycosis (fungal infection), which can cause similar symptoms, but the image doesn't show fungal indicators like fungus balls or typical fungal patterns under a microscope. Also, the presence of scaling and the involvement of the adjacent skin points more towards psoriasis.</think><answer> Final Answer:psoriasis </answer>

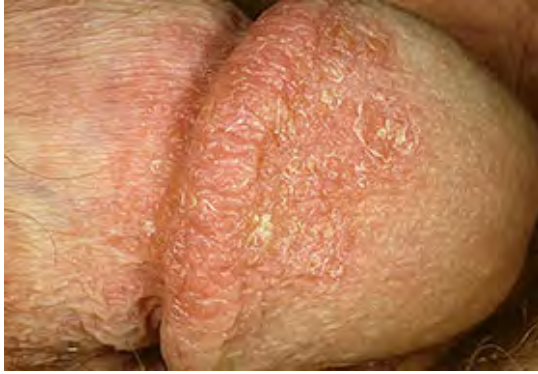

Case078: psoriasis

**SkinGPT-R1 Response:**

<think>Okay, let's see. The user provided an image showing a skin lesion with thick, silvery-white scales on a reddish-pink base. The borders are slightly raised and irregular, and the scales are thick and well-defined. They mentioned it's consistent with psoriasis. The question is to confirm the diagnosis based on the image evidence, differential diagnosis, and then the final diagnosis. First, the image depicts thick, silvery-white scales, which are a key feature of psoriasis. The reddish-pink base and irregular borders also point toward psoriasis. Dermatoscopically, psoriasis might show hyperkeratosis and overlying scale. The differential diagnosis could include other scaling disorders like seborrheic keratosis or lichen planus, but those usually have different appearances. Seborrheic keratosis might have a more warty texture, and lichen planus has a different pattern of scaling. However, the image here fits psoriasis better, so the final diagnosis should be psoriasis.</think><answer> Final Answer:psoriasis </answer>

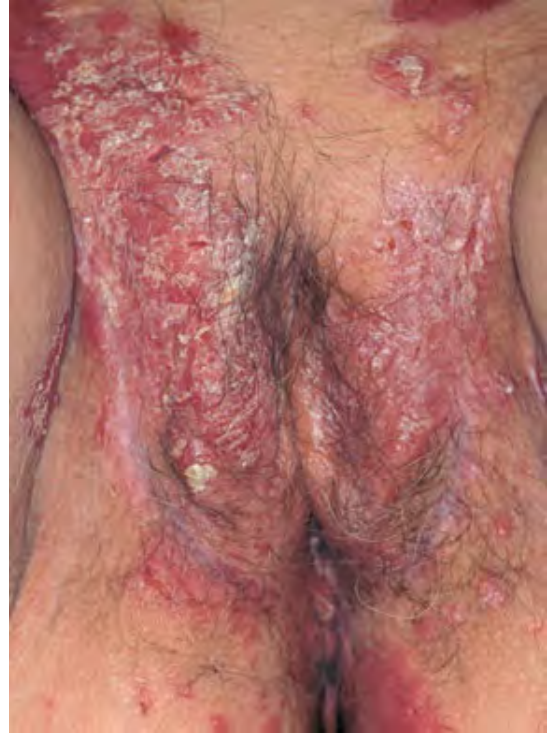

Case079: psoriasis

**SkinGPT-R1 Response:**

<think>Okay, let's see. The user provided an image showing red, scaly patches with irregular borders on the genital area. The key points mentioned are thick, silvery-white scales, which are indicative of psoriasis. The distribution is typical for psoriasis, and there's no mention of other conditions like eczema or fungal infections. The differential diagnosis ruled out those alternatives because the scales are specific to psoriasis. So, the image-grounded evidence supports psoriasis. The differential diagnosis considered other possibilities but dismissed them based on the characteristics of the lesions. Since the lesion characteristics align with psoriasis, that diagnosis is supported.</think><answer> Final Answer:psoriasis </answer>

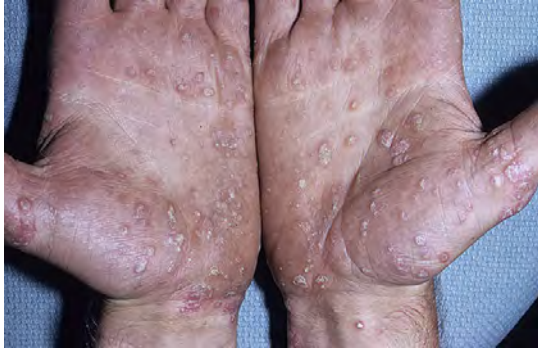

Case080: psoriasis

**SkinGPT-R1 Response:**

<think>Okay, let's see. The user provided an image showing hands with thickened, scaling skin, especially on the palms and fingers. The scales are thick and irregular, and there are red patches under the scales. The distribution is symmetrical, and the skin around the nails is involved. The differential diagnosis mentioned includes psoriasis, lichen planus, and contact dermatitis. The key points here are the thick scaling, symmetric distribution, and involvement of the nail area. Psoriasis is known for these features, especially the thick silvery scales and symmetry. Lichen planus usually has a different appearance, more like purple-tan plaques with a net-like pattern under the microscope. Contact dermatitis would be due to an allergen or irritant, which might have a different distribution and possibly less severe scaling. The image depicts thick scales, which aligns more with psoriasis. So the final diagnosis should be psoriasis.</think><answer> Final Answer:psoriasis </answer>

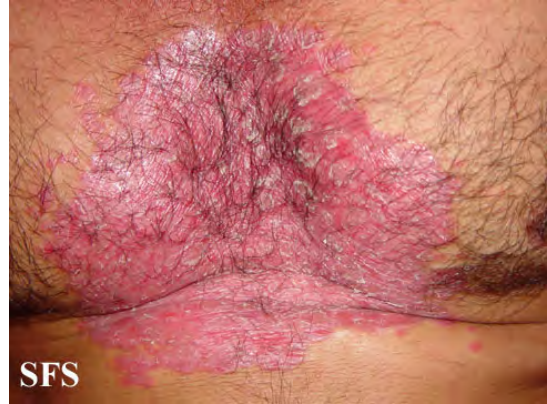

Case082: psoriasis

**SkinGPT-R1 Response:**

<think>Okay, let's see. The user provided an image showing a red, scaly lesion on hairy skin. The key points mentioned are thick, silvery-white scales, sharply defined borders, and a slightly raised appearance. The image also notes that the scales are thick and prominent, which is characteristic of psoriasis. The differential diagnosis was considered, but the features align most with psoriasis. So, the question is asking for the diagnosis based on the image. The image depicts thick, silvery-white scales, which are a classic sign of psoriasis. Sharply defined borders and plaque-like lesions also point towards psoriasis. Other conditions like seborrheic dermatitis might have similar scales, but the sharply defined borders and the presence of keratinous scales (like those mentioned) are more indicative of psoriasis. I need to make sure there's no other condition that could mimic this. For example, eczema might have similar scaling, but the image specifies thick scales, which eczema typically doesn't have. Also, the sharp borders are more consistent with psoriasis plaques. The differential was considered, but the image evidence supports psoriasis. Therefore, the final diagnosis should be psoriasis.</think><answer> Final Answer:psoriasis </answer>

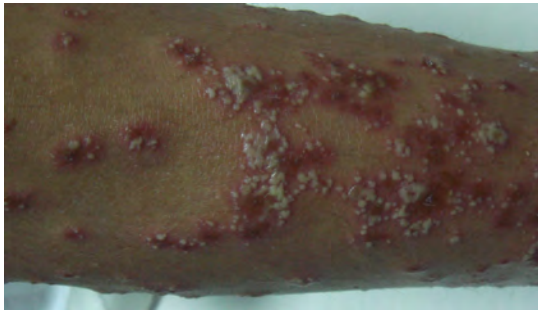

Case081: psoriasis

**SkinGPT-R1 Response:**

<think>Okay, let's see. The user provided an image showing a skin condition on an arm. The key points mentioned are red plaques with silvery-white scales, sharp-defined borders, and symmetric distribution. The image also notes that these characteristics are consistent with psoriasis. The differential diagnosis was considered, but the main reasoning points towards psoriasis. So, the question is asking for the final diagnosis based on the image. Since the image depicts features consistent with psoriasis and rules out other possibilities by stating the reasons they are less likely, the answer should be psoriasis. I need to make sure there's no confusion here. The image doesn't show anything contradicting psoriasis, such as other scaling diseases like seborrheic dermatitis or eczema, which have different scale characteristics. The sharp borders and symmetry are classic for psoriasis.</think><answer> Final Answer:psoriasis </answer>

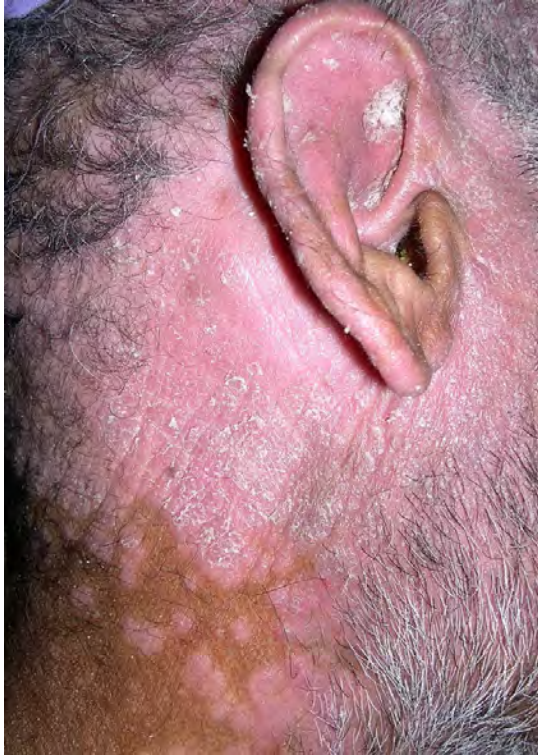

Case083: psoriasis

**SkinGPT-R1 Response:**

<think>Okay, let's see. The user wants me to diagnose the condition based on the provided image. The image depicts thickened, erythematous skin with silvery-white scales. The earlobe and surrounding area have scaling and thickening. The key features here are the plaques with overlying scale, which are classic for psoriasis. Other conditions like seborrheic dermatitis might have similar scaling, but the image specifies thickened plaques and the presence of silvery-white patches, which are more indicative of psoriasis. Psoriasis often presents with well-defined plaques, especially on the scalp and ears. The differential diagnosis would consider other scaling disorders, but the main points here are the morphology and the presence of typical psoriatic lesions.</think><answer> Final Answer:psoriasis </answer>

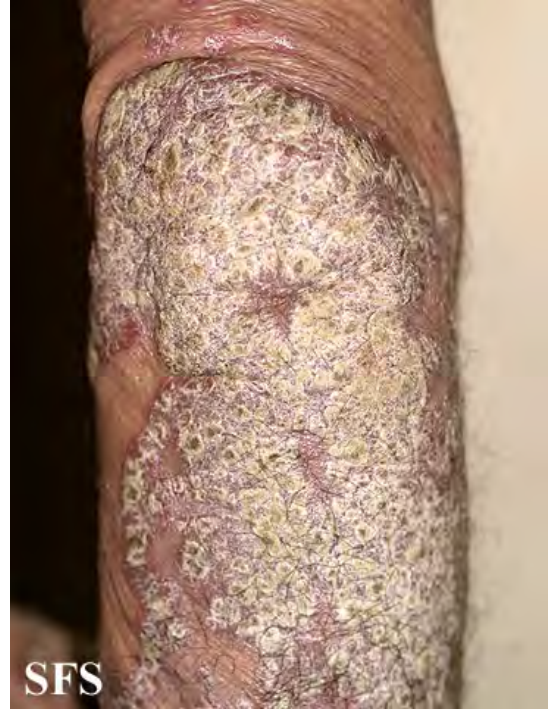

Case084: psoriasis

**SkinGPT-R1 Response:**

<think>Okay, let's see. The user provided an image showing a thickened, scaly lesion on the knee. The scales are irregular in size and shape, and there's inflammation with redness. The key points here are the thick scaling, plaques, and the location on the extensor surface of the knee. Psoriasis is known for these characteristics, with thick, silvery scales especially on pressure points like knees and elbows. The image also displays an appearance consistent with psoriasis. The differential diagnosis might include other conditions like eczema, which can have scaling, but eczema typically has a different texture and may be more moist. Seborrheic keratosis could have similar scaling, but it's usually a raised lesion. Actinic keratosis might have a different texture as well. Given the findings, psoriasis is the most likely diagnosis.</think><answer> Final Answer:psoriasis </answer>

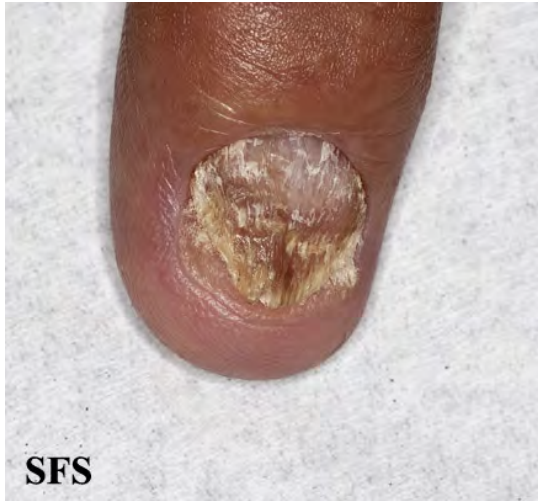

Case085: psoriasis

**SkinGPT-R1 Response:**

<think>Okay, let's see. The user provided an image showing a fingernail with a thickened, irregularly shaped cuticle and nail plate. There's scaling and discoloration, especially at the edge. The surrounding skin is slightly erythematous. The key points here are the thickened cuticle, scaling, and discoloration. The differential diagnosis mentioned in the image includes psoriasis, onychomycosis, and contact dermatitis. The image notes that the scaling and hyperkeratosis are consistent with psoriasis. Onychomycosis usually has a different appearance and might show different colors or patterns. Contact dermatitis would probably have more redness and a different distribution. Since the image displays features consistent with psoriasis, the answer should be psoriasis.</think><answer> Final Answer:psoriasis </answer>

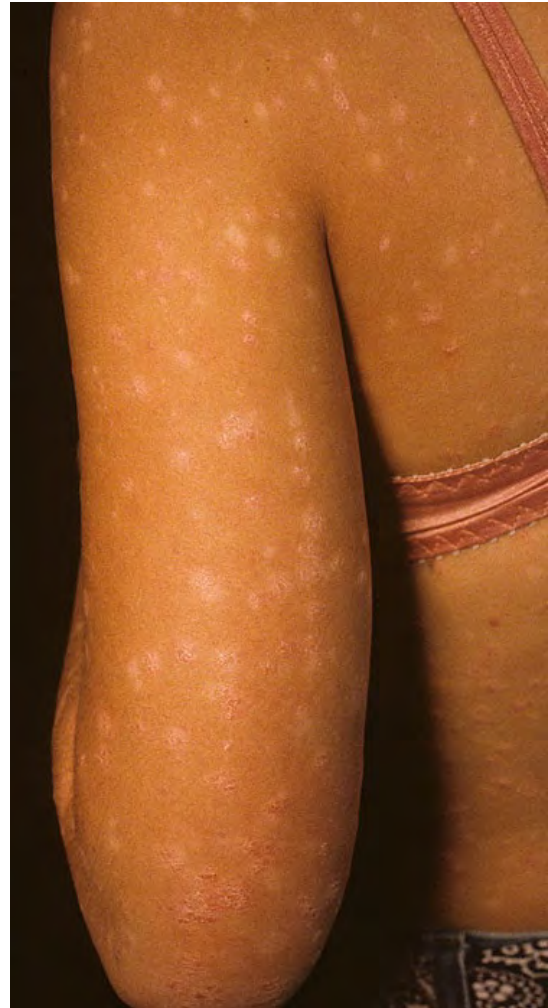

Case087: psoriasis

**SkinGPT-R1 Response:**

<think>Okay, let's see. The user provided an image showing a person's arm with small, raised, white spots on a pinkish background. The spots are evenly distributed and have a scaling appearance. The image illustrates that the skin has a rough texture with these white patches. The differential diagnosis rules out other conditions like eczema or psoriasis because the spots are too uniform and not sharply defined. The key here is that the image displays features consistent with psoriasis. So, the answer should be psoriasis.</think><answer> Final Answer:psoriasis </answer>

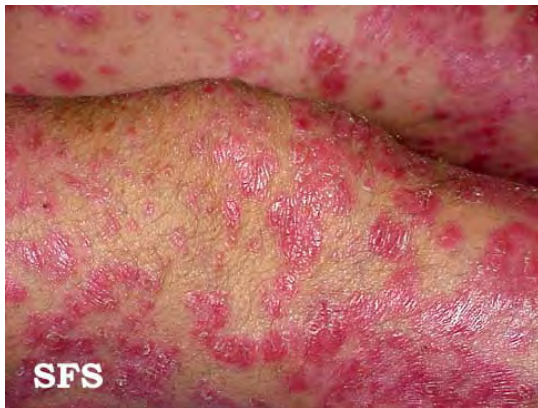

Case086: psoriasis

**SkinGPT-R1 Response:**

<think>Okay, let's see. The user provided an image showing red plaques with scales, sharp borders, and symmetric distribution. The image depicts thickened, elevated areas with a silvery sheen. Dermoscopic features like hyperkeratosis and irregular epidermal hyperplasia are noted. The differential was considered, but the key points here are the classic signs of psoriasis: plaque-like lesions, scaling, and the presence of keratin build-up. Unlike eczema or seborrheic dermatitis, the image aligns with psoriasis. The answer should just be psoriasis in the box.</think><answer> Final Answer:psoriasis </answer>

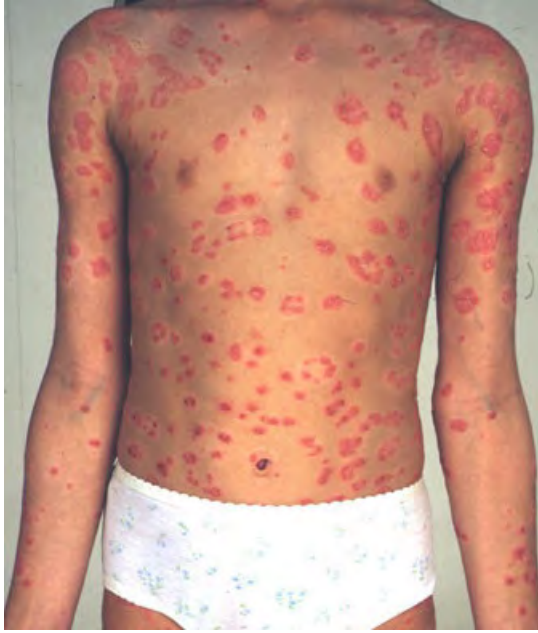

Case088: psoriasis

**SkinGPT-R1 Response:**

<think>Okay, let's see. The user provided an image showing a person with red, circular lesions on the back and arms. The lesions have clear borders and vary in size. Some have a slightly raised appearance, and there's minimal scaling. The distribution is symmetric, and the skin between the lesions is normal. The differential diagnosis mentioned includes psoriasis, pityriasis rosea, and atopic dermatitis. The key here is to infer the most likely diagnosis based on the given image. The image depicts that the lesions are red, circular, with clear borders and varying sizes. Psoriasis is known for having plaque-like lesions with scales, but the image shows minimal scaling. However, psoriasis can sometimes have lesions without much scaling. Pityriasis rosea typically presents as annular or polycyclic lesions, which might not fit the circular shape depicted. Atopic dermatitis usually has a different morphology, often with excoriation and lichenification, which isn't mentioned here. The symmetry and distribution also align with psoriasis, which often affects multiple body areas symmetrically. So the final diagnosis should be psoriasis.</think><answer> Final Answer:psoriasis </answer>

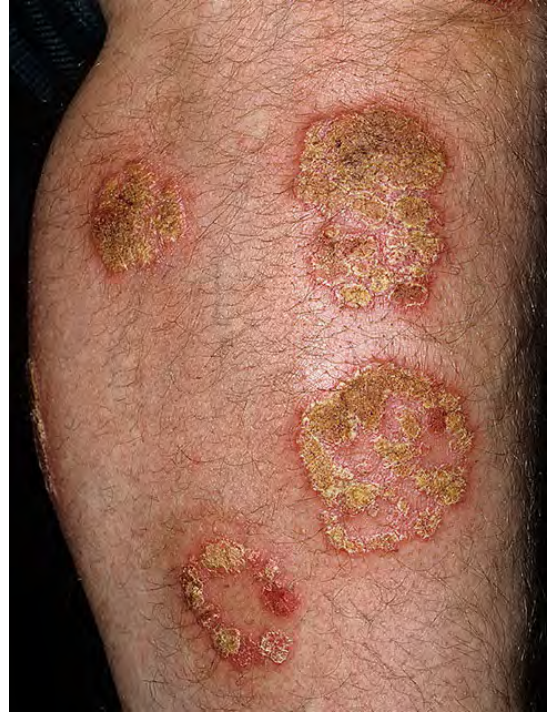

Case089: psoriasis

**SkinGPT-R1 Response:**

<think>Okay, let's see. The user provided an image showing plaques on the skin with scaling, redness, and well-defined borders. The key points here are the thick, silvery scales, which are a hallmark of psoriasis. The image also shows that the lesions have a raised, erythematous base and are distributed in a typical pattern for psoriasis. Additionally, there's no mention of other conditions like eczema or fungal infections, which might present differently. The differential diagnosis would consider other possibilities, but since the image emphasizes the characteristic features of psoriasis—like the scaling and plaque formation—those other conditions are less likely. This could directly reflect that.</think><answer> Final Answer:psoriasis </answer>

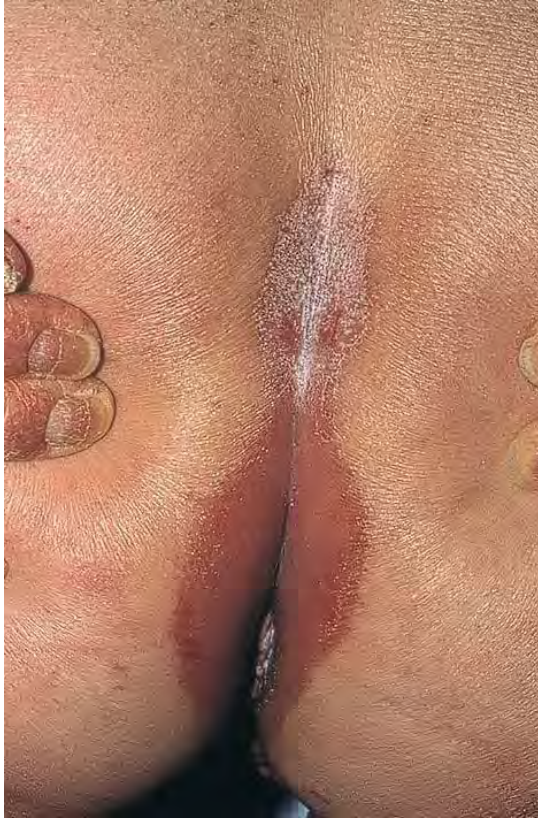

Case090: psoriasis

**SkinGPT-R1 Response:**

<think>Okay, let's see. The user provided an image showing a red, scaly lesion on the back. The key points mentioned are thick, silvery-white scales, sharply defined borders, and an irregular shape. The image also notes that the scales are prominent and the lesion has a well-defined margin. The differential diagnosis was considered, but the conclusion was psoriasis. So, the question is asking for the final diagnosis based on the image. The image depicts thick scales, which are a hallmark of psoriasis. Other conditions like eczema might have different scaling, maybe more inflammatory or vesicular. Dermato-phytosis would have different features, perhaps more erythematous and possibly with satellite lesions. The sharp borders and irregular shape also fit with psoriasis, which can have plaque-like lesions. Since the image aligns with psoriasis characteristics and rules out other possibilities, the answer should be psoriasis.</think><answer> Final Answer:psoriasis </answer>

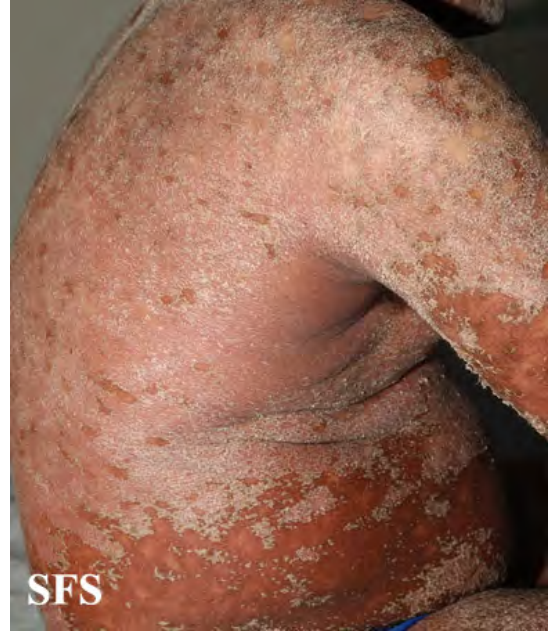

Case091: psoriasis

**SkinGPT-R1 Response:**

<think>Okay, let's see. The user provided an image showing a skin condition on the back. The key points mentioned are thick, irregular scales, red patches, and a rough texture. The image shows that these are typical of psoriasis. The differential diagnosis was considered, but the main reasoning points to psoriasis. So, the answer should be psoriasis. I need to make sure there's no other diagnosis mentioned. The image displays features consistent with psoriasis, so the final diagnosis is definitely psoriasis.</think><answer> Final Answer:psoriasis </answer>

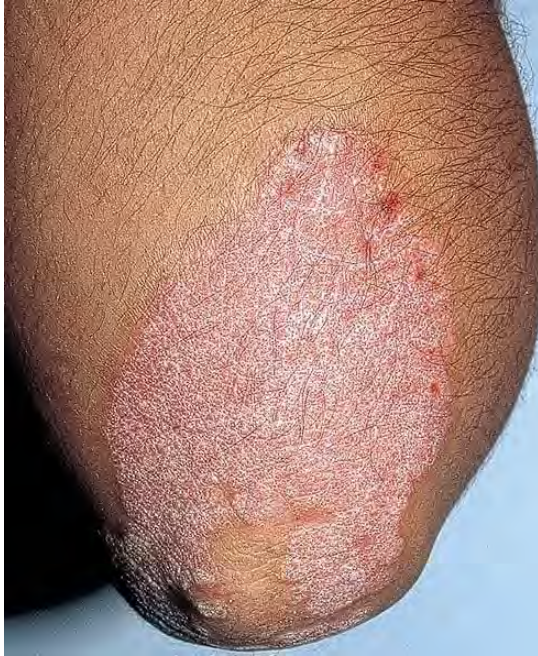

Case092: psoriasis

**SkinGPT-R1 Response:**

<think>Okay, let's see. The user provided an image showing a skin lesion on the knee. The key points mentioned are thick, silvery-white scales, red patches, slightly raised edges, and a well-defined border. The image also notes that the scales are prominent and the lesion has a typical appearance for psoriasis. First, I need to recall the characteristics of psoriasis. Psoriasis is known for thick, silvery scales over red, inflamed areas. The lesions often have a well-defined edge and can be plaque-like. The presence of scales and the coloration fit with psoriasis. Now, looking at the differential diagnosis. Other conditions like seborrheic dermatitis might have scaling, but it's usually more inflammatory and involves the face and scalp. Dermatophytosis (like ringworm) would have different scaling and maybe a different distribution. Eczema can have similar features but might not have the same type of scaling. However, the image depicts the scales as thick and silvery-white, which is more characteristic of psoriasis than eczema. Also, the well-defined border and elevated nature of the lesion point towards psoriasis. Another consideration could be lichen planus, which has a different pattern of scaling and sometimes a purple hue, but the image doesn't mention that. There's no conflicting information here. The image aligns with the typical features of psoriasis, so the final diagnosis should be psoriasis.</think><answer> Final Answer:psoriasis </answer>

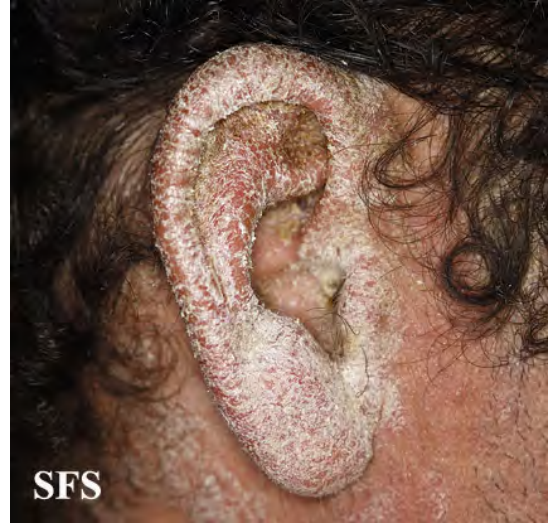

Case093: psoriasis

**SkinGPT-R1 Response:**

<think>Okay, let's see. The user provided an image showing an ear with thick, white, scaly patches. The scales are irregularly distributed, and the skin around the ear is involved. The key points here are the thick scaling, which is a hallmark of psoriasis. The differential diagnosis needs to be considered. Psoriasis is known for its characteristic plaques with silvery scales. Other conditions like seborrheic dermatitis also cause scaling, but they usually have a different appearance, maybe more erythematous and fissured. Dermatophytosis would show fungal elements under the microscope, which aren't mentioned here. The image depicts thick, white scales, which aligns more with psoriasis, and the image evidence supports that. So the final diagnosis should be psoriasis.</think><answer> Final Answer:psoriasis </answer>

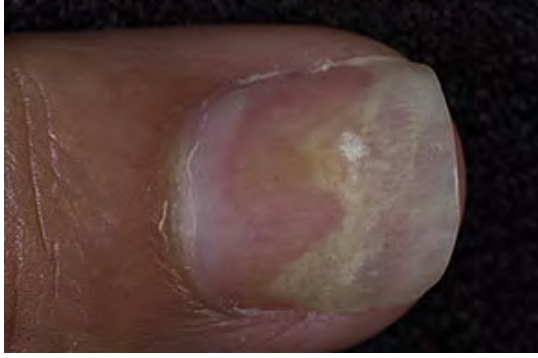

Case094: psoriasis

**SkinGPT-R1 Response:**

<think>Okay, let's see. The user provided an image showing a fingernail with thickened, yellowish discoloration, scaling, and irregular borders. The key points here are the thickening, discoloration (yellowish), scaling, and uneven borders. The differential diagnosis needs to be considered. First, the image shows that the nail has thickening and scaling, which are common in psoriasis. Psoriasis often presents with these features, especially on the nails, where it can cause pitting, thickening, or changes in color. The yellowish discoloration might be due to hyperkeratosis or inflammation typical of psoriatic lesions. The irregular borders also align with psoriasis, which can have a verrucous appearance. Looking at the differential diagnosis, other conditions like onychomycosis (fungal nail infection) could present with similar symptoms, but the image doesn't show discoloration more typical of fungal infections, such as greenish or brownish hues. Another possibility is lichen planus, which can affect the nails and cause hyperplasia and hypoplasia, but again, the image doesn't report those specific features. The main clues here are the scaling, thickening, and color change, which point more towards psoriasis. Thus, psoriasis is more likely.</think><answer> Final Answer:psoriasis </answer>

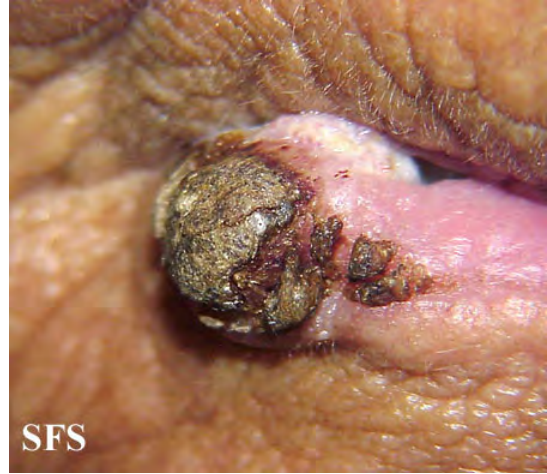

Case095: squamous cell carcinoma

**SkinGPT-R1 Response:**

<think>Okay, let's see. The user provided an image showing a raised, irregularly shaped lesion on the tongue. The key points mentioned are a rough, crusty surface, irregular borders, and a possible ulceration. The color is noted as uneven with areas of hyperpigmentation and hypopigmentation. The surrounding tissue has telangiectasias. The differential diagnosis was considered, but first I need to confirm the features mentioned. The lesion is raised and irregular, which are common in carcinomas. The crusty, rough surface and irregular borders point towards malignancy. Telangiectasias around the lesion might indicate vascular changes often seen in tumors. The presence of both hyper- and hypopigmentation could be due to atypical melanin production or necrosis. The image also displays that the overall appearance is consistent with squamous cell carcinoma. The differential might have included other possibilities like benign tumors or infections, but the image rules those out by noting the characteristics do not match.</think><answer> Final Answer:squamous cell carcinoma </answer>

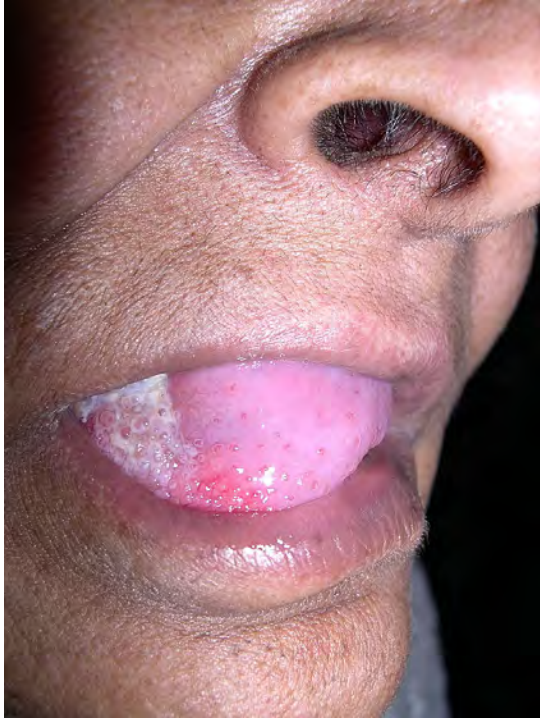

Case096: squamous cell carcinoma

**SkinGPT-R1 Response:**

<think>Okay, let's see. The user provided an image showing a person's mouth with a tongue that has irregular, raised lesions. The lesions are red and white, with irregular borders and varying sizes. The surrounding tissue is inflamed, and there's no clear symmetry. The image displays illustrates that these features are consistent with squamous cell carcinomas. The differential diagnosis was considered, but the key points here are the irregular borders, heterogeneous appearance, and lack of symmetry, which are all indicative of malignancy. So, the answer should be straightforward.</think><answer> Final Answer:squamous cell carcinoma </answer>

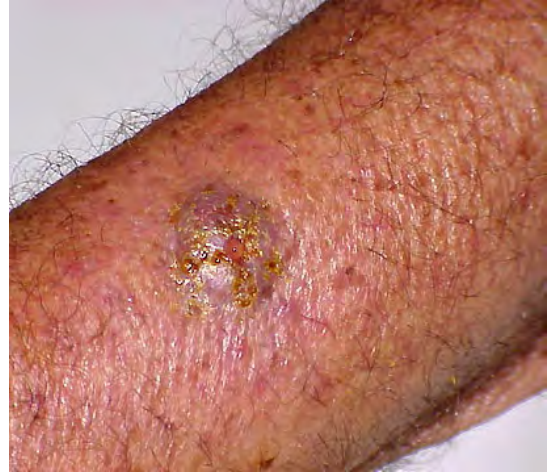

Case097: squamous cell carcinoma

**SkinGPT-R1 Response:**

<think>Okay, let's see. The user provided an image showing a raised, irregularly shaped lesion on the forearm. The key points mentioned are irregular borders, uneven coloration with red, pink, and brown patches, and a possible crust or scale. The surrounding skin has hair follicles, and the lesion stands out because of its size and atypical features. The differential diagnosis was considered, but first I need to confirm the image-grounded evidence. The lesion is raised, which is common in carcinomas. Irregular borders and uneven coloration suggest malignancy. Crust or scale might indicate a chronic lesion, but squamous cell carcinomas can have those features. Considering differential diagnosis, the answer should align with that. The differential might include things like actinic keratosis, basal cell carcinoma, or other tumors, but the image displays features consistent with squamous cell carcinoma. So the final diagnosis should be squamous cell carcinoma.</think><answer> Final Answer:squamous cell carcinoma </answer>

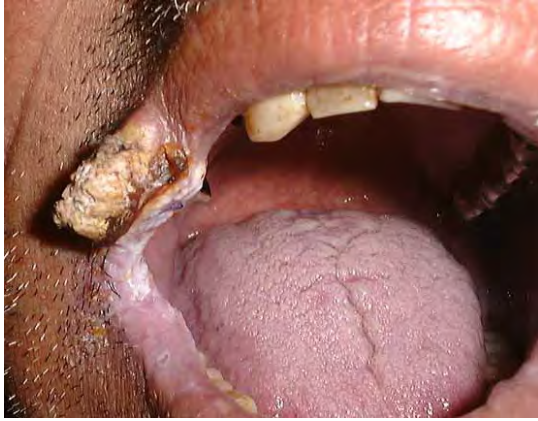

Case098: squamous cell carcinoma

**SkinGPT-R1 Response:**

<think>Okay, let's see. The user provided an image showing a person's mouth with a raised, irregularly shaped lesion on the tongue. The lesion is rough and uneven, with a possible ulceration. The surrounding tissue is inflamed, and there's a tooth above the lesion. The key points here are the raised, irregular lesion, rough texture, and possible ulceration. The differential diagnosis mentioned includes benign conditions like leukoplakia or actinic cheilosis, but the image displays features more consistent with malignancy. So, the image-grounded evidence would focus on the morphology: raised, irregular, rough, possibly ulcerated. The color isn't specified; it could be red or white, but the exact color isn't mentioned. The borders are irregular, which is a common feature of malignancies. The differential diagnosis considers benign alternatives, but the image shows features more consistent with malignancy. The final diagnosis is squamous cell carcinoma. The consistency rule indicates keeping the diagnosis unchanged even if there's inconsistency, but in this case the image supports malignancy. So the answer should be squamous cell carcinoma.</think><answer> Final Answer:squamous cell carcinoma </answer>

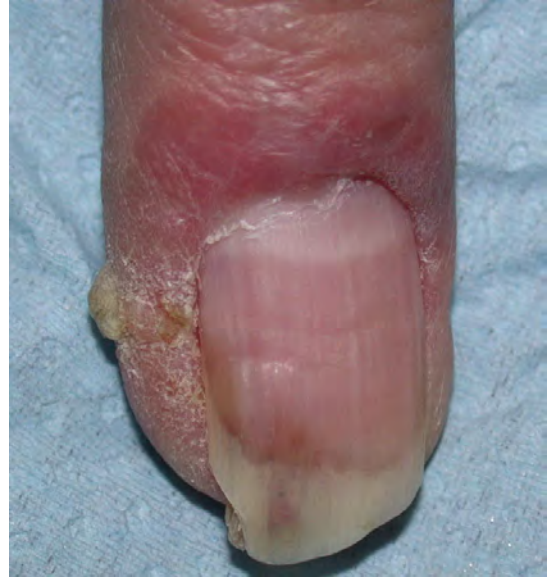

Case099: squamous cell carcinoma

**SkinGPT-R1 Response:**

<think>Okay, let's see. The user provided an image showing a finger with a thickened, irregular nail. The surrounding skin is red and inflamed, and there's a rough, uneven surface under the nail. The nail itself is discolored with a yellowish tint and thickened. The key points here are the irregularity, thickness, discoloration, and inflammation. The differential diagnosis needs to be considered. Let me think about the features mentioned. Squamous cell carcinoma often presents with thickened, discolored nails, sometimes with overlying scaling or ulceration. The inflammation around the nail bed could be due to the tumor's growth pressing on the surrounding tissue. The irregular shape and thickening of the nail are typical for this type of cancer. Other differential diagnoses might include benign conditions like onychomycosis, which can cause discoloration and thickening, but usually without the same level of inflammation or irregularity. Psoriasis or other inflammatory skin diseases might affect the nail, but the presence of a cancerous lesion would be more concerning. Since the image displays the possibility of malignancy, I would be concerned.</think><answer> Final Answer:squamous cell carcinoma </answer>

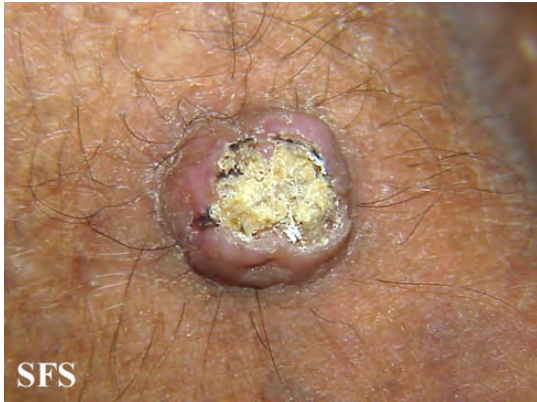

Case100: squamous cell carcinoma

**SkinGPT-R1 Response:**

<think>Okay, let's see. The user provided an image showing a raised, irregularly shaped lesion on the skin. The key points mentioned are a central crust or ulceration, irregular borders, and a possible satellite lesion. The image also notes that the surrounding skin has fine telangiectasias. The differential diagnosis considered includes basal cell carcinoma, squamous cell carcinoma, and other possibilities. So, the question is to infer the most likely diagnosis based on the image. The image depicts that the lesion has features consistent with squamous cell carcinoma, like irregular borders and a central crater. Basal cell carcinomas often have a pearly appearance with a rolled margin, which isn't mentioned here. The presence of a central ulceration and satellite lesions are more typical of squamous cell cancer. The telangiectasias around it might be related to the tumor's vascular supply. Overall, this could be squamous cell carcinoma.</think><answer> Final Answer:squamous cell carcinoma </answer>

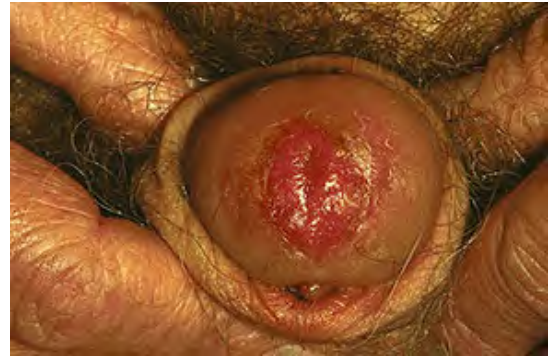

Case101: squamous cell carcinoma

**SkinGPT-R1 Response:**

<think>Okay, let's see. The user provided an image showing a raised, reddish lesion on the genitalia. The key points mentioned are a central nodule with a slightly elevated, irregular border. The color is reddish-pink, and there's surrounding hyperpigmentation. The texture is rough, and the borders are irregular. Dermoscopic features aren't clearly visible, but the clinical appearance is concerning. The differential diagnosis was considered, but the question is to confirm the diagnosis based on the image. First, the image depicts a raised lesion with an irregular border, which is a common feature of malignancies like squamous cell carcinoma. The central nodule and reddish-pink color also align with typical presentations. Hyperpigmentation around the lesion might be due to chronic inflammation or neoplasia. The rough texture and irregular borders are strong indicators of malignancy. There's no conflicting information in the image that would suggest another diagnosis. So the final diagnosis is squamous cell carcinoma.</think><answer> Final Answer:squamous cell carcinoma </answer>

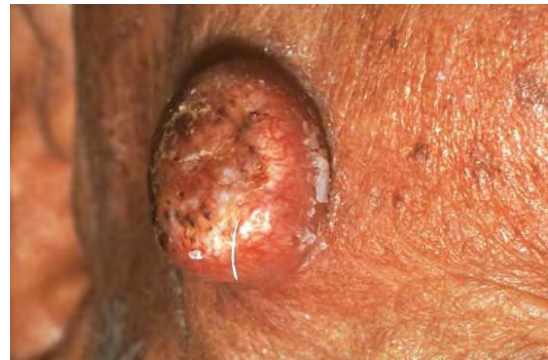

Case102: squamous cell carcinoma

**SkinGPT-R1 Response:**

<think>Okay, let's see. The user provided an image showing a raised, irregularly shaped lesion on the skin. The key points mentioned are that the lesion has a rough, uneven surface with possible ulceration or exudate. The surrounding skin is reddened, and there's no clear border. The texture is nodular and possibly infiltrative. The differential diagnosis was considered, but the question asks for the final diagnosis based on the image evidence. The image depicts features consistent with squamous cell carcinoma, which often has characteristics like irregular borders, rough texture, and possible ulceration. The differential was probably other types of tumors or benign lesions, but the image evidence supports squamous cell carcinoma.</think><answer> Final Answer:squamous cell carcinoma </answer>

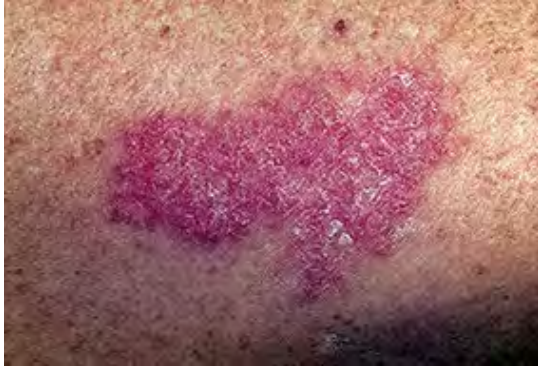

Case103: squamous cell carcinoma

**SkinGPT-R1 Response:**

<think>Okay, let's see. The user provided an image showing a pinkish-red patch on the skin with irregular borders and some scaling. The key points here are the irregular borders, which suggest an uneven edge, and the scaling, which might indicate thickened or crusty areas. The image also displays that the lesion doesn't have the typical features of benign conditions like seborrheic keratosis or actinic keratosis. So, the differential diagnosis needs to be considered. Benign conditions like seb keratosis usually have a more defined shape and aren't as irregular. Actinic keratoses are typically found on sun-exposed areas and can be scaly, but they might not have the same aggressive border. The presence of irregular borders and scaling could point towards a more malignant lesion. Squamous cell carcinoma often presents with irregular borders, thickness, and may have a warty appearance due to scaling. The image illustrates depicts that the lesion lacks the typical features Of benign conditions, which supports the idea that it's something more serious. Since quamous cellcarcinoma.</think><answer> Final Answer:squamous cell carcinoma </answer>

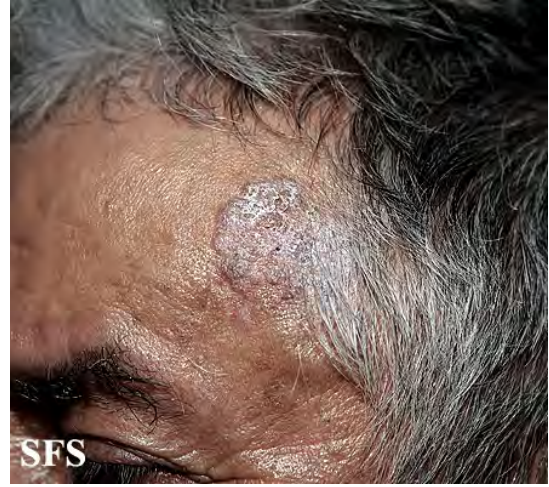

Case104: squamous cell carcinoma

**SkinGPT-R1 Response:**

<think>Okay, let's see. The user provided an image showing a raised, irregularly shaped lesion on the forehead. The key points mentioned are scaling, crusty appearance, irregular borders, and a possible ulceration. The surrounding skin has some hyperpigmentation and the hair is gray. The differential diagnosis was considered, but First, I need to confirm the features mentioned. The lesion is raised and irregular, which can be seen in various cancers. The scaling and crusty surface might indicate a chronic lesion, possibly a SCC since they can have a keratinized appearance. Irregular borders are a common feature of malignancies like SCC. Ulceration could also be present in more advanced cases. The presence of hyperpigmentation around the lesion might be due to inflammation or the body's response, but that's more about the surrounding area. The differential diagnoses might include other conditions like actinic keratosis, basal cell carcinoma, or maybe even something like a fungal infection. But the image displays depicts the features are consistent with squamous cellcarcinoma. However, the user wants me to reason based on the image evidence provided. The image displays displays that the features are "consistent with the clinical presentation of squamous cell carci-noma." So even though the differential was considered, the answer should align with that. But wait, the question is asking for the final diagnosis based on theimage. But I need to make sure there's no inconsistency. The image shows displays the lesion has scaling and crustiness, which are typical of SCC. Irregular border and ulceration also point towards malignancy. The hyperpigmentation might be a reaction, but that doesn't contradict the diagnosis. So the final diagnosis is squamoscellar-carcinoma.</think><answer> Final Answer:squamous cell carcinoma </answer>

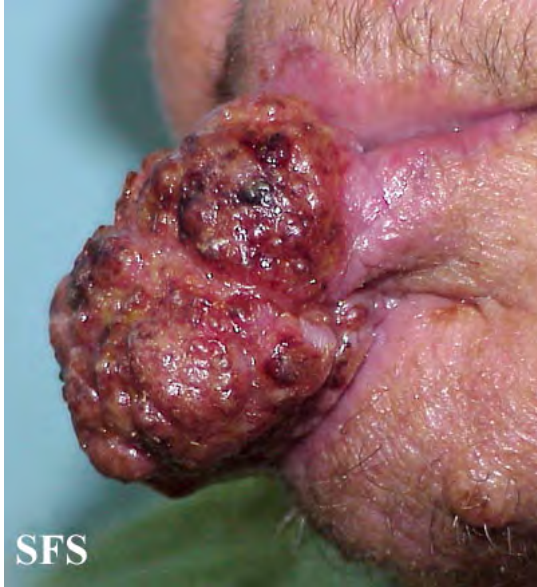

Case105: squamous cell carcinoma

**SkinGPT-R1 Response:**

<think>Okay, let's see. The user provided an image showing a raised, irregularly shaped lesion on the skin. The key points mentioned are irregular borders, an elevated and nodular appearance, a reddish-pink color, and a rough, uneven surface. The surrounding area has some inflammation and possible ulceration. These features are consistent with squamous cell carcinoma. The differential diagnosis was considered, but the features align with squamous cell carcinoma. Therefore, the answer should be squamous cell carcinoma.</think><answer> Final Answer:squamous cell carcinoma </answer>

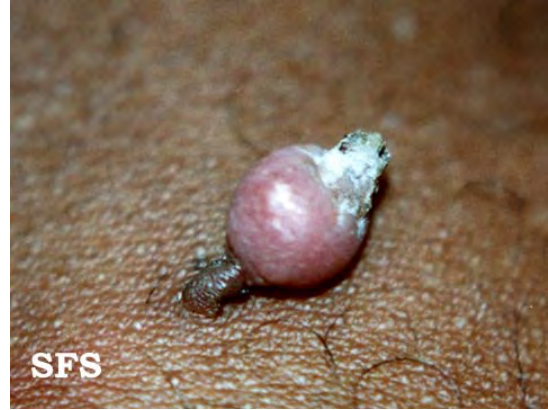

Case106: squamous cell carcinoma

**SkinGPT-R1 Response:**

<think>Okay, let's see. The user provided an image showing a skin lesion. The key points mentioned are a raised, pinkish nodule with a smooth surface and slightly irregular borders. There's some scaling around the base, and the surrounding skin has a rough texture. The image also shows that the lesion doesn't have the typical features of benign conditions like seborrheic keratosis or actinic keratosis. The differential diagnosis considered includes squamous cell carcinoma. So, the image-grounded evidence: the lesion is raised, pink, with irregular borders and scaling. The surrounding area is rough. The image depicts features consistent with squamous cell carcinoma. The differential was ruled out because it doesn't fit benign conditions. The final diagnosis should be squamous cell carcinoma.</think><answer> Final Answer:squamous cell carcinoma </answer>

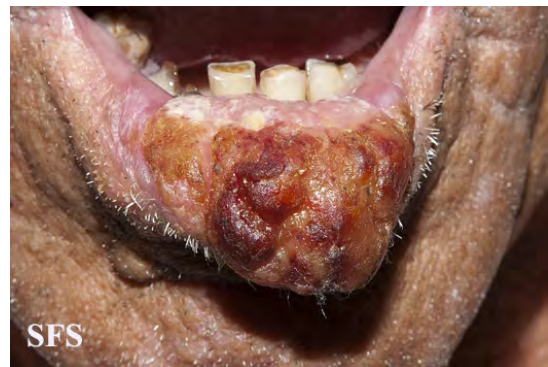

Case107: squamous cell carcinoma

**SkinGPT-R1 Response:**

<think>Okay, let's see. The user provided an image showing an oral lesion. The key points mentioned are a raised, irregularly shaped mass with uneven surface, red to brown color, and possible ulceration or exophytic growth. The surrounding tissue has inflammation, and the lesion is localized. The differential diagnosis was considered, but the question is asking for the final diagnosis based on the image evidence. The image depicts a lesion consistent with squamous cell carcinoma, which often presents as raised, irregular masses with those color and texture features. The differential was probably things like benign tumors or other cancers, but the image supports squamous cell carcinoma.</think><answer> Final Answer:squamous cell carcinoma </answer>

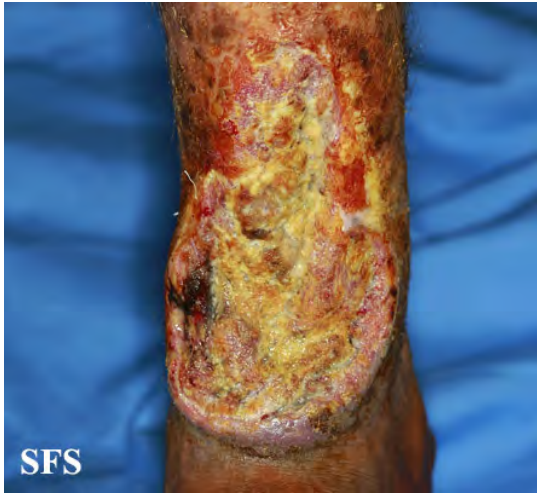

Case108: squamous cell carcinoma

**SkinGPT-R1 Response:**

<think>Okay, let's see. The user provided an image showing a lower limb lesion. The key points mentioned are irregularly shaped, raised, and with uneven coloration — red, yellow, and brown. There's exudate and possible ulceration. The borders are irregular and poorly defined. The texture is rough, and there's no clear central scar. Dermoscopic features aren't visible. The differential was considered, but the conclusion was squamous cell carcinoma. The question is asking for the final diagnosis based on the image evidence. The image depicts features consistent with that diagnosis, such as irregular shape, color variation, and an aggressive growth pattern. The differential might have included other lesions like basal cell carcinoma or melanoma, but the image doesn't show those specific features. Overall, this could be squamous cell carcinoma.</think><answer> Final Answer:squamous cell carcinoma </answer>

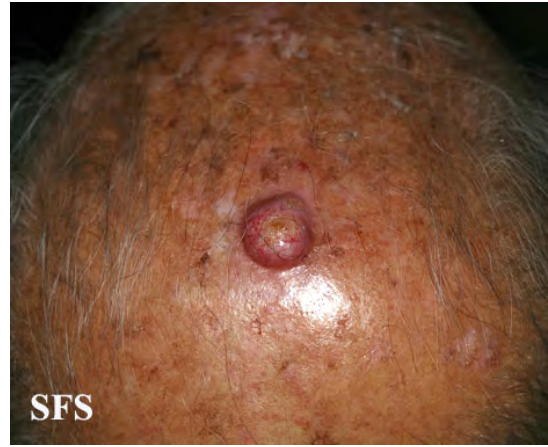

Case109: squamous cell carcinoma

**SkinGPT-R1 Response:**

<think>Okay, let's see. The user provided an image showing a raised, slightly ulcerated lesion on the scalp. The key points mentioned are irregular borders, uneven surface, and possible inflammation. The differential diagnosis was considered, but first I need to describe the visible evidence. The lesion is elevated, has an irregular border, and an uneven surface. There's possible inflammation around it. Dermoscopy wasn't mentioned, so maybe those features are from the clinical appearance. Squamous cell carcinomas often present as raised lesions with irregular borders and possibly ulcerated. The image displays these characteristics, which align with squamous cell cancer. Other possibilities like basal cell carcinoma might have different features, but the image doesn't mention pearly edges or a central depression. Actinic keratoses can be scaly, but they're usually flat. The presence of an ulcerated area and irregular borders points more towards malignancy.</think><answer> Final Answer:squamous cell carcinoma </answer>

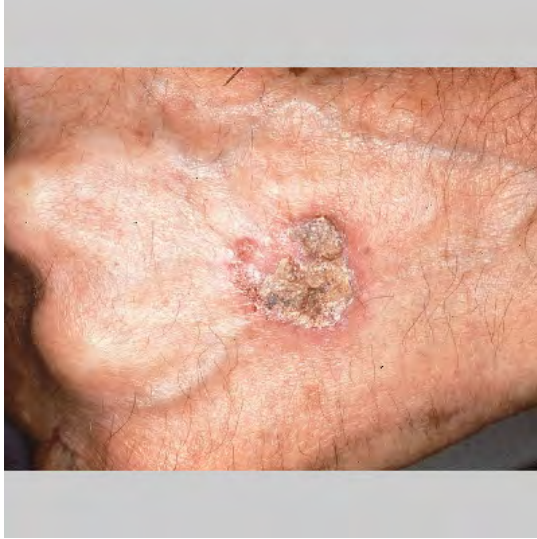

Case110: squamous cell carcinoma

**SkinGPT-R1 Response:**

<think>The image shows a raised, irregularly shaped lesion on the face with a central crust or ulceration, irregular borders, surrounding hyperkeratosis, a rough texture, and a location on sun-exposed skin. These features are consistent with squamous cell carcinoma (SCC). Basal cell carcinoma could be considered, but the lesion lacks the pearly appearance and telangiectasias more typical of BCC.</think><answer> Final Answer:squamous cell carcinoma </answer>

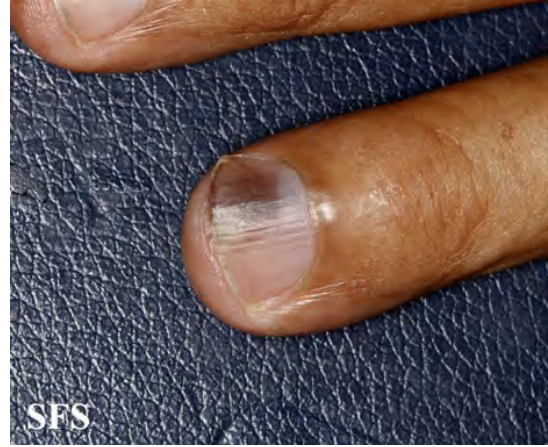

Case111: squamous cell carcinoma

**SkinGPT-R1 Response:**

<think>Okay, let's see. The user provided an image showing a finger with a thickened, irregularly shaped nail. The nail has a white, opaque area with an uneven border. The surrounding skin is rough and hyperpigmented. The background is blue leather. The key points here are the thickened nail, irregular shape, white opaque area, uneven border, rough skin, and hyperpigmentation. The question is to infer the most likely diagnosis based on these image details. First, I need to recall the typical features of squamous cell carcinomas. They can present as raised, crusty lesions, sometimes with an ulcerated appearance. On histology, they have keratin pearls and may show an infiltrative growth pattern. Clinically, they might present with a thickening of the nail bed, changes in nail morphology, and sometimes associated with other signs like hyperkeratosis or pigmentation. The image depicts a thickened nail with an irregular shape and a white, opaque area. The presence of an uneven border and rough, hyperpigmented skin around the nail suggests possible invasion or involvement of adjacent tissues. Squamous cell carcinoma often presents with such features, including changes in the nail structure. Other differential diagnoses could be benign conditions like onychomycosis, which causes nail thickening but usually doesn't have the same aggressive border. Psoriasis or lichen planus can also cause nail changes, but again, the image displays an irregular border and hyperpigmentation, which might be more consistent with cancer. However, without seeing the image in detail, it's challenging to be certain. But based on the given information, the key indicators point towards squamous cell carcinoma. The thickened nail and the irregular border are red flags. The hyperpigmentation and rough skin around the nail could be due to the tumor's invasion. So, the final diagnosis should be squamous cell carcinoma.</think><answer> Final Answer:squamous cell carcinoma </answer>

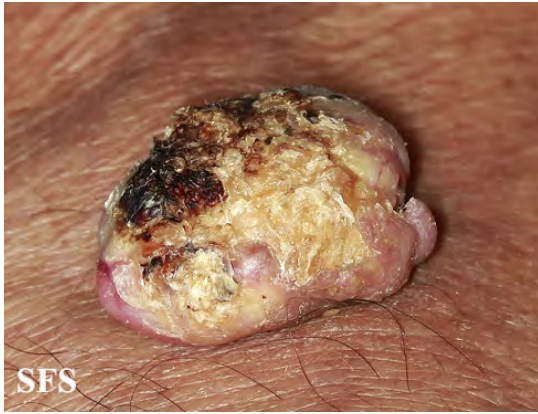

Case112: squamous cell carcinoma

**SkinGPT-R1 Response:**

<think>Okay, let's see. The user provided an image showing a raised, irregularly shaped lesion with a crusty, ulcerated surface. The base is uneven, and there are areas of necrosis or scarring. The surrounding skin has hair follicles, and the lesion is on a hairy area. The key points here are the irregular shape, crusty texture, ulceration, and necrosis. The differential diagnosis needs to be considered. First, the image displays depicts it's a raised lesion with these features. Squamous cell carcinoma (SCC) often presents as a firm, elevated lesion with a rough surface. The presence of ulceration and necrosis can be seen in SCC, especially if it's been there for a while or in a chronically sun-exposed area. The fact that it's on a hairy skin area might be relevant because SCCs can occur in sun-damaged areas, but they can also appear elsewhere. The image shows displays the lesion has an irregular border and heterogeneous appearance, which are typical of malignancies like SCC. Other differential diagnoses could be basal cell carcinoma (BCC), but BCC usually has a different appearance, maybe more pearly or with a rolled edge. However, the image here displays ulceration and Necrosis, which are more indicative of SCC. Also, the crusty, exudative surface might be consistent with SCC. Another possibility is a verrucous carcinoma, but those are less common and might have a different growth pattern. Given ation,necrosis), the differential is less likely to be other types of carcinomas unless there's specific evidence. But the image doesn't mention anything suggesting another type, so the most probable is SCC.</think><answer> Final Answer:squamous cell carcinoma </answer>

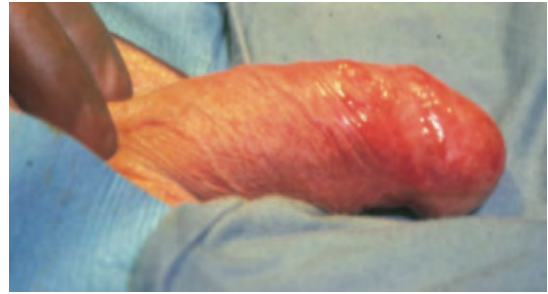

Case113: squamous cell carcinoma

**SkinGPT-R1 Response:**

<think>Okay, let's see. The user provided an image and wants me to diagnose it based on that. The image depicts a raised, irregularly shaped lesion with a reddish-pink hue. The surface is slightly elevated and has uneven borders. There's no mention of typical benign features like a horn cyst or fibroma. The key points here are the irregular shape, uneven borders, and color. Squamous cell carcinomas often have these characteristics. The differential diagnosis might consider other cancers, but since the image doesn't show anything specific to benign lesions, the most likely diagnosis is squamous cell carcinoma.</think><answer> Final Answer:squamous cell carcinoma </answer>

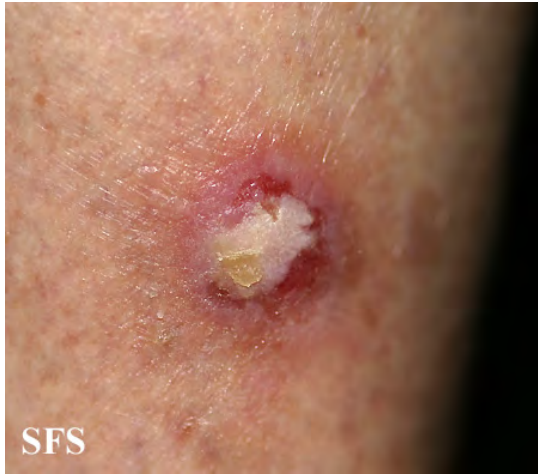

Case114: squamous cell carcinoma

**SkinGPT-R1 Response:**

<think>Okay, let's see. The user provided an image showing a skin lesion. The key points mentioned are a raised, irregularly shaped lesion with a crusty, ulcerated surface. The base is reddish-pink, and there's a yellowish exudate. The surrounding skin has some hyperpigmentation and inflammation. The image depicts that the lesion has irregular borders and a central area of necrosis or ulceration. Dermoscopic features aren't clearly visible, but the overall appearance is consistent with a malignancy. The differential diagnosis considered includes basal cell carcinoma and squamous cell carcinoma. So, the question is to infer the most likely diagnosis based on the image. The image shows that the lesion is raised, irregular, with crusty ulceration, a reddish-pink base, and yellowish exudate. The surrounding areas have hyperpigmentation and inflammation. The key here is that the lesion's characteristics are consistent with a malignant tumor. The differential between basal cell carcinoma (BCC) and squamous cell carcinoma (SCC) is important. BCCs often have a pearly or waxy appearance, sometimes with a rolled margin, and might have telangiectasias. SCCs can be more aggressive, with ulceration and a thicker, rougher texture. The image illustrates irregular borders and necrosis/ulceration, which are more indicative of SCC. Also, the presence of exudate and the type of base (reddish-pink) might support SCC. However, I need to make sure there's no inconsistency. The image does mention that the lesion could be either BCC or SCC, but the features listed (irregular borders, ulceration, exudate) lean more towards SCC. Therefore, the final diagnosis is squamous cell carcinoma.</think><answer> Final Answer:squamous cell carcinoma </answer>

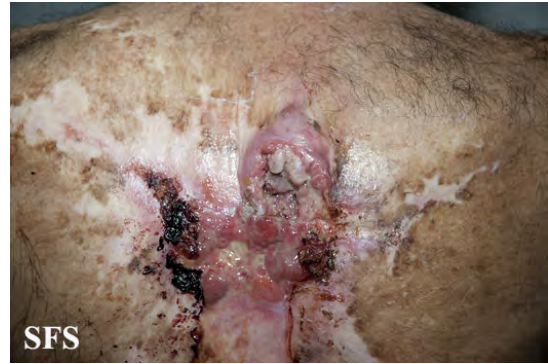

Case115: squamous cell carcinoma

**SkinGPT-R1 Response:**

<think>Okay, let's see. The user provided an image showing a skin lesion. The key points mentioned are an irregularly shaped, elevated lesion with a crusty surface, uneven coloration, and possible ulceration. The surrounding area has atrophic changes and hyperpigmentation. The differential diagnosis was considered, but the image displays features consistent with it, like irregular borders and heterogeneous texture. The differential was ruled out because those features don't fit other conditions. So the answer should be squamous cell carcinoma.</think><answer> Final Answer:squamous cell carcinoma </answer>

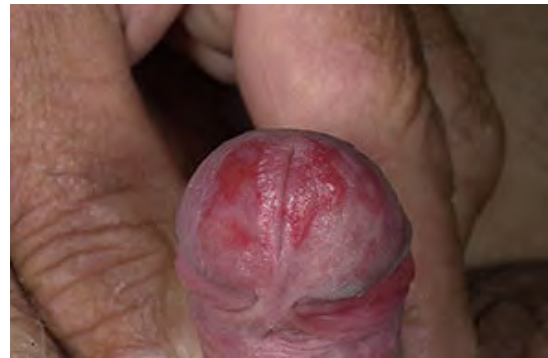

Case116: squamous cell carcinoma

**SkinGPT-R1 Response:**

<think>Okay, let's see. The user provided an image showing a red, slightly elevated lesion on the genital area. The key points mentioned are irregular borders, uneven surface, and possible invasion. The differential was considered, but first, I need to confirm the image-grounded evidence. The lesion is red, raised, with irregular borders and an uneven surface. Those are typical features of malignancies like carcinomas. The image also displays possible invasion, which aligns with how squamous cell carcinomas can present. Now, looking at the differential diagnosis. The user mentioned considering other possibilities, but the confident diagnosis here is squamous cell carcinoma. The reasoning would be that the image shows features consistent with that diagnosis, such as the morphology and potential invasion. So the final diagnosis is squamous cell carcinoma.</think><answer> Final Answer:squamous cell carcinoma </answer>

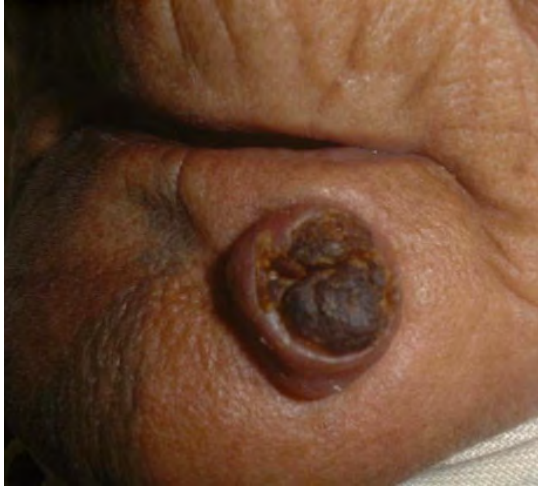

Case117: squamous cell carcinoma

**SkinGPT-R1 Response:**

<think>Okay, let's see. The user provided an image showing a raised, irregularly shaped lesion on the skin. The key points mentioned are uneven surface, possible crust or scaling, and a slightly elevated border. The color is noted as darker than surrounding skin. The differential diagnosis was considered, but first I need to confirm the image-grounded evidence. The lesion is raised, irregular, with an elevated border and possibly crust or scaling. The color is darker than the surrounding area. Dermoscopy wasn't mentioned, but the image shows possible crust or scaling, which might be seen in SCC. The differential could include other cancers like basal cell carcinoma, but the elevated border and crust/scale might point more towards SCC. However, without dermoscopic findings, it's tricky.</think><answer> Final Answer:squamous cell carcinoma </answer>

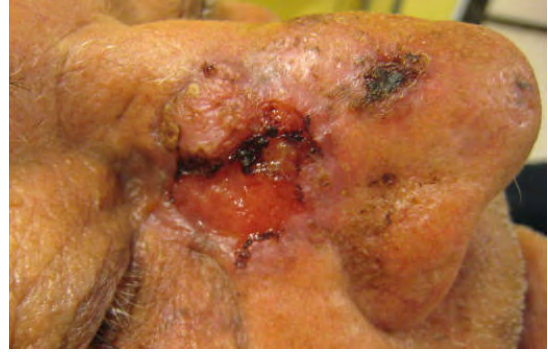

Case118: squamous cell carcinoma

**SkinGPT-R1 Response:**

<think>Okay, let's see. The user provided an image showing a skin lesion. The key points mentioned are irregularly shaped, raised, with a crusty surface, red and inflamed, uneven borders, and areas of necrosis. The surrounding skin has hyperkeratosis and induration. The differential was considered, but first I need to confirm the features. Irregular shape and borders, crusting, inflammation, necrosis—these are all typical of malignancies like squamous cell carcinoma. The presence of hyperkeratotic scaling and induration also points towards a keratinizing tumor. The differential might have included things like chronic ulcer, infection, or other cancers, but the image displays features consistent with squamous cell. So the answer should be that.</think><answer> Final Answer:squamous cell carcinoma </answer>

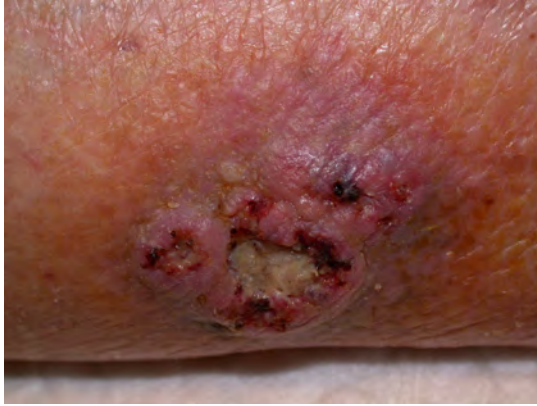

Case119: squamous cell carcinoma

**SkinGPT-R1 Response:**

<think>Okay, let's see. The user provided an image showing a skin lesion. The key points mentioned are irregularly shaped, raised with a crusty surface, uneven coloration from pink to reddish-purple, and some areas with blackened eschar. The borders are irregular and elevated, and there's surrounding inflammation and ulceration. The image also notes that the appearance is concerning for a malignant lesion. The differential diagnosis was considered. So, the question is to confirm the diagnosis based on the image. The image displays features consistent with squamous cell carcinoma, like irregular borders, crusting, and eschar. Other possibilities, such as basal cell carcinoma or other malignancies, might be considered, but the image specifically displays features consistent with squamous cell carcinoma. I need to make sure there's no contradiction. The image shows the lesion has characteristics consistent with squamous cell carcinoma, so the final diagnosis is squamous cell carcinoma.</think><answer> Final Answer:squamous cell carcinoma </answer>

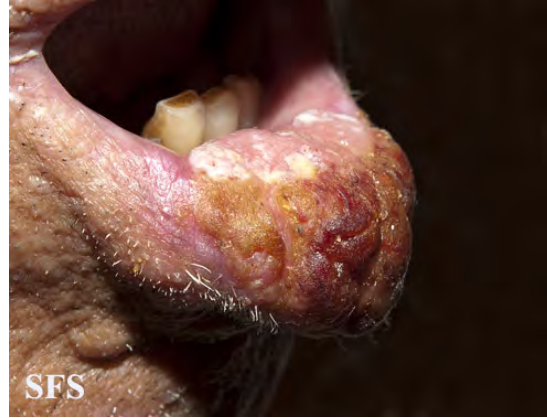

Case120: squamous cell carcinoma

**SkinGPT-R1 Response:**

<think>Okay, let's see. The user provided an image showing a raised, irregularly shaped lesion on the oral mucosa. The key points mentioned are a rough, uneven surface, reddish-pink color, and possible ulceration or exophytic growth. The surrounding tissue has hair follicles, which might indicate a site like the lip. The image also notes that the lesion doesn't have the typical features of benign conditions like fibroma or papilloma. So, the differential diagnosis needs to be considered. Benign lesions like fibromas or papillomas usually have distinct shapes and may be more uniform. Since the lesion here is irregular and exophytic, those might be ruled out. The color is reddish-pink, which could be consistent with some malignancies. The presence of ulceration or exophytism suggests a more aggressive growth. Squamous cell carcinoma often presents as a raised, ulcerated lesion with irregular borders. The location on the oral mucosa also fits, as oral cancers are common there. The image depicts that it doesn't fit benign features, so the most likely diagnosis is squamous cell carcinoma.</think><answer> Final Answer:squamous cell carcinoma </answer>

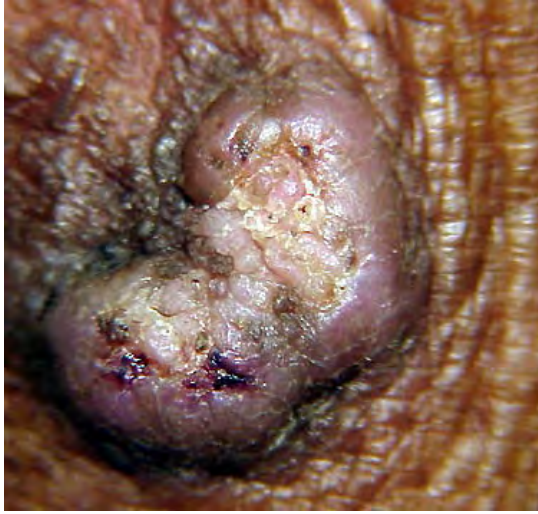

Case121: squamous cell carcinoma

**SkinGPT-R1 Response:**

<think>Okay, let's see. The user provided an image showing a raised lesion with irregular borders, uneven surface, and possible ulceration. The color is reddish-pink with some areas of crust or scaling. The surrounding skin has a thickened texture. The differential was mentioned, but the key here is to base the diagnosis solely on the image given. The image depicts features consistent with squamous cell carcinoma: irregular borders, ulceration, and crusty scaling. The differential might have considered other possibilities, like basal cell carcinoma or other types of cancer, but the image aligns more with squamous cell.</think><answer> Final Answer:squamous cell carcinoma </answer>

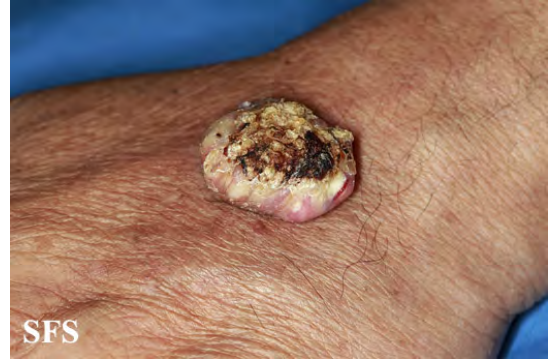

Case122: squamous cell carcinoma

**SkinGPT-R1 Response:**

<think>Okay, let's see. The user provided an image showing a raised lesion on the forearm. The key points mentioned are a crusty, ulcerated surface with eschar formation. The borders are irregular and elevated, and there's surrounding induration. The image also notes that the lesion has a thickened, irregular base with possible satellite lesions. The differential diagnosis was considered, but first I need to confirm the features mentioned. Crusty and ulcerated, with eschar, suggests a chronic infection or a tumor with necrosis. Irregular borders and elevation point towards malignancy. Induration around the lesion is common in carcinomas. The thickened, uneven base also aligns with SCC, which often has an infiltrative growth pattern. Satellite lesions might indicate metastasis or satellite lesions, which is seen in some cancers. Now, looking at the differential diagnosis. Could it be something else? Like a basal cell carcinoma? Basal cell carcinomas can be nodular or superficial, but they usually have a more well-defined margin and might not have the same degree of induration or eschar. Also, satellite lesions are more characteristic of melanoma or other aggressive tumors. Another possibility is a fungal infection like tinea corporis, but those typically have a different appearance, maybe annular or with a different texture. However, the presence of eschar and induration makes me think more of a neoplastic process. The image evidence supports this with the mentioned features. No conflicting cues are mentioned, so the final diagnosis is squamous cell carcinoma.</think><answer> Final Answer:squamous cell carcinoma </answer>

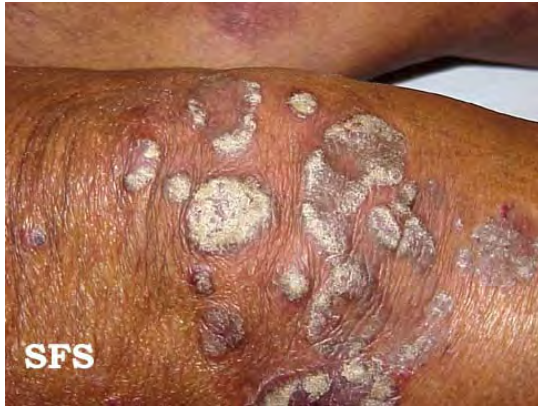

Case123: psoriasis

**SkinGPT-R1 Response:**

<think>Okay, let's see. The user provided an image showing a skin condition on the lower leg. The key points mentioned are thickened, raised plaques with silvery-white scales. The borders are slightly elevated and irregular, and the distribution is symmetric. The image also notes that there's no evidence of other conditions like eczema. The differential was considered, but the features align with psoriasis. So, the image-grounded evidence includes thickened plaques, silvery scales, and a symmetric distribution. The differential diagnosis ruled out eczema because there were no oozing or weeping lesions. The presence of scaling and the symmetric pattern point more toward psoriasis. Since the features align with psoriasis, that is the most likely diagnosis.</think><answer> Final Answer:psoriasis </answer>

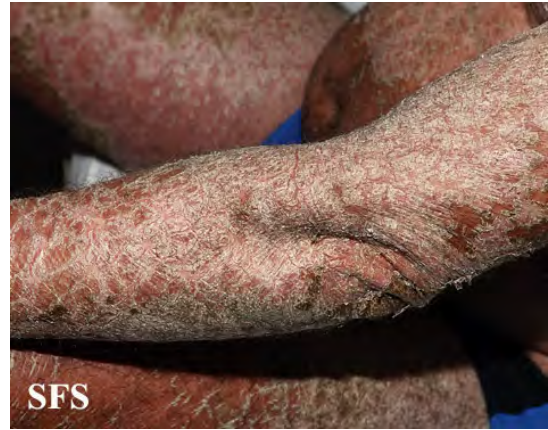

Case125: psoriasis

**SkinGPT-R1 Response:**

<think>Okay, let's see. The user provided an image showing thick, red skin with scaling and plaques. The key points mentioned are sharply defined borders, thickened and elevated areas, and prominent scales. The image also notes that these features are consistent with psoriasis. The differential diagnosis was considered, but the image-grounded evidence displays thick, red plaques with scaling, which are classic signs of psoriasis. The differential diagnosis might have included other conditions like eczema or seborrheic dermatitis, but the image illustrates that the features don't fit those. Psoriasis is known for its well-defined borders and thick scales, which align with the shown characteristics.</think><answer> Final Answer:psoriasis </answer>

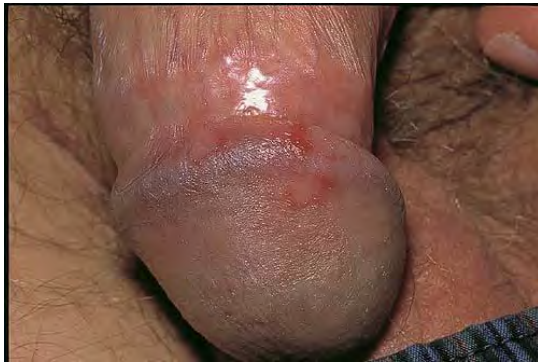

Case124: psoriasis

**SkinGPT-R1 Response:**

<think>Okay, let's see. The user provided an image and wants me to diagnose it based on that. The image depicts thickened, erythematous skin with scaling and plaques, especially in the flexural areas. The key points here are the scaling, plaques, and location. Psoriasis is known for these features, especially in flexural areas like the knee. The differential diagnosis might include other conditions like eczema or seborrheic dermatitis, but the image shows that the scales and plaques are more consistent with psoriasis. Eczema usually has a different appearance, maybe more vesicles or oozing, while seborrheic dermatitis might have a different distribution. So the answer should be psoriasis.</think><answer> Final Answer:psoriasis </answer>

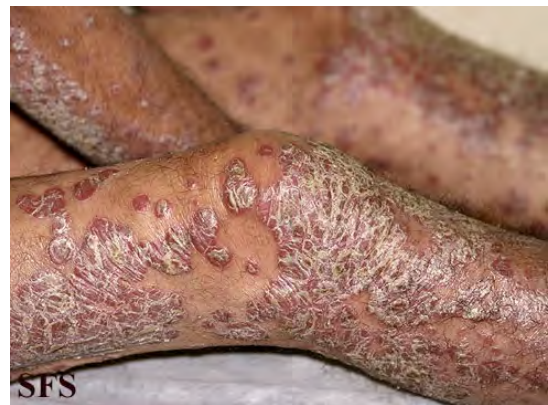

Case126: psoriasis

**SkinGPT-R1 Response:**

<think>The image shows a skin condition on the forearm with plaque-like morphology, thick irregular scales, sharply defined red plaques, and a waxy/silvery appearance. The distribution appeared chronic and the scales were prominent. These features are most consistent with psoriasis; other possibilities were considered but psoriasis was favored based on the image.</think><answer> Final Answer:psoriasis </answer>

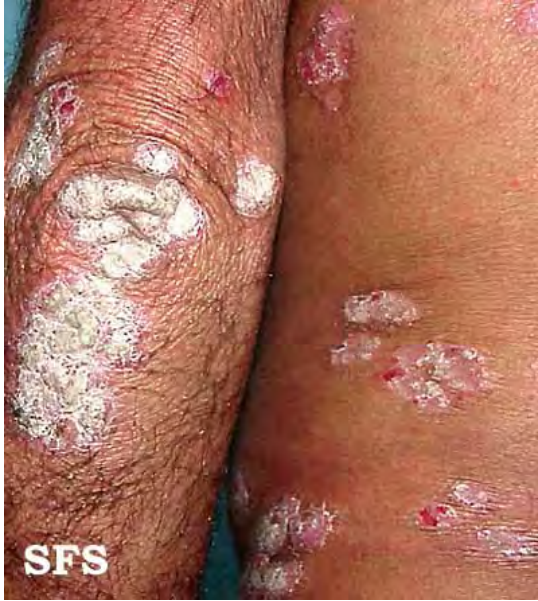

Case127: psoriasis

**SkinGPT-R1 Response:**

<think>Okay, let's see. The user provided an image showing a person's knees with red, scaly patches. The scales are thick and white, forming plaques. The skin has a rough texture, and the lesions are well-defined with sharp borders. There's no mention of other features like nail involvement or joint pain, which might suggest something else. The key here is the thick, silvery-white scales on inflamed skin. Psoriasis is known for those characteristics—plaque-like lesions with scale. Other conditions like eczema might have similar scaling, but the image depicts sharp borders and thick scales, which are more indicative of psoriasis. Dermatophytosis would have different scaling and maybe fungal spores visible, which aren't mentioned. The differential diagnosis should consider alternatives, but the main clues point to psoriasis. So the final diagnosis should be psoriasis.</think><answer> Final Answer:psoriasis </answer>

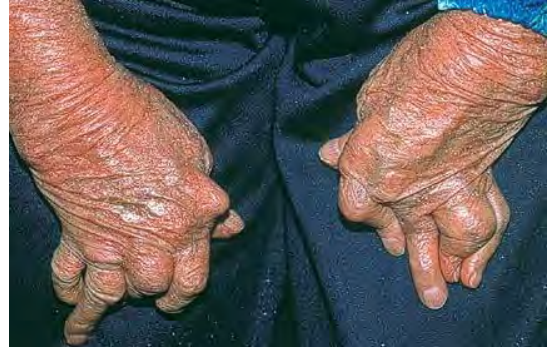

Case128: psoriasis

**SkinGPT-R1 Response:**

<think>Okay, let's see. The user provided an image showing hands with thick, rough, hyperkeratotic skin. The skin is red and has scaling. The fingers are slightly bent, and the texture is coarse. The image shows features consistent with psoriasis, like thickened scales and erythema. The differential was considered, but the key points here are the hyperkeratosis and scaling, which are typical of psoriasis. Other conditions like eczema might have similar scaling, but the hyperkeratosis and the specific morphology mentioned point more towards psoriasis.</think><answer> Final Answer:psoriasis </answer>

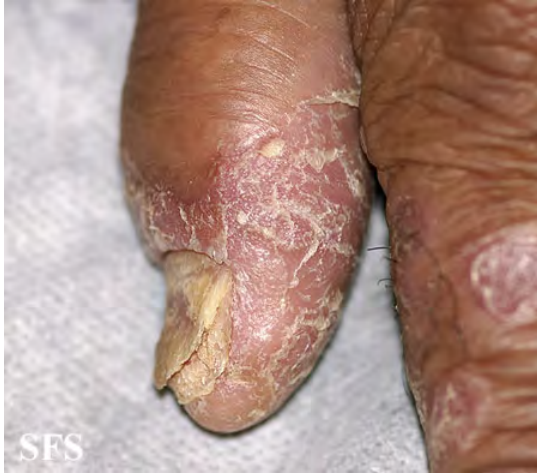

Case129: psoriasis

**SkinGPT-R1 Response:**

<think>Okay, let's see. The user provided an image showing a close-up of a foot with thick, scaling skin on the toes and heel. The key points mentioned are thickened, irregularly shaped scales, hyperkeratosis, and possible inflammation. The image also notes that the skin has a rough texture with patches of varying sizes and colors, and there's no significant redness or lesions. The differential diagnosis was considered. So, the question is to infer the most likely diagnosis based on the image evidence. First, let's recap the image: thick, scaling skin and hyperkeratinization, which are classic signs of psoriasis. The presence of plaques with silvery scales is a hallmark of psoriasis. The image depicts hyperkeratotic plaques, which align with psoriasis. There's no mention of other conditions like eczema, which might have different scaling patterns or inflammation. The absence of significant redness rules out conditions like psoriatic arthritis or other inflammatory diseases. The differential diagnosis considered other possibilities, but the image supports psoriasis. Therefore, the final diagnosis should be psoriasis.</think><answer> Final Answer:psoriasis </answer>

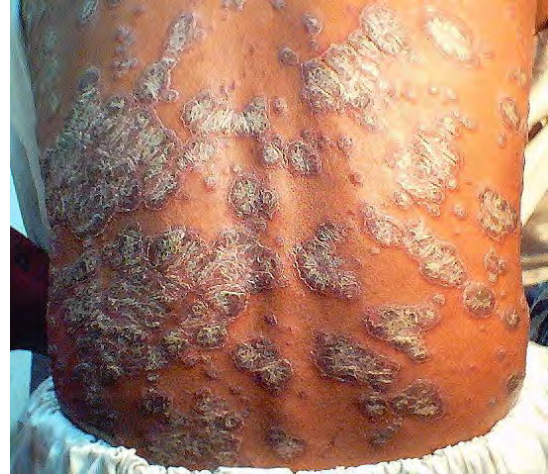

Case130: psoriasis

**SkinGPT-R1 Response:**

<think>Okay, let's see. The user provided an image showing a person's back with thick, raised plaques that have scales. The plaques are red or skin-colored with clearly defined borders. The image displays multiple lesions with symmetric distribution and thickened, silvery scales. Dermoscopic features aren't visible here. The key points here are the thick plaques, scaling, and the morphology. Psoriasis is known for having these characteristics: red plaques with silvery scales, well-defined borders, and often symmetric distribution. Other conditions like eczema might have similar plaques but usually don't have the same type of scaling. Seborrheic keratoses can have a similar appearance but are typically single lesions, not multiple. Lichen planus has a different pattern and may have different scaling. Given the image, the most likely diagnosis is psoriasis. The differential diagnosis would include other scaly disorders, but the image aligns closely with psoriasis. So the final diagnosis should be psoriasis.</think><answer> Final Answer:psoriasis </answer>

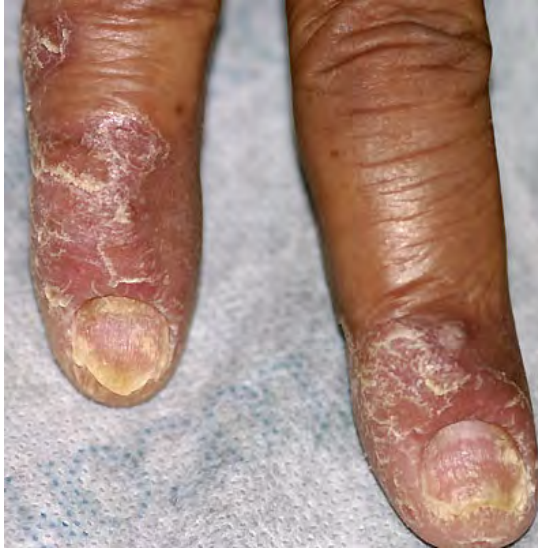

Case131: psoriasis

**SkinGPT-R1 Response:**

<think>Okay, let's see. The user provided an image showing thickened, scaling skin on the fingers with hyperkeratosis, especially around the nail beds. The nails are involved, and there's no inflammation or other lesions. The key points here are the thickened, hyperkeratotic skin and the involvement of the nail beds, which are typical of psoriasis. The differential diagnosis needs to be considered. Psoriasis is known for these features, like plaques with scales. Other possibilities could be eczema, which might have different scaling patterns or inflammation. But the image depicts no inflammation, so eczema is less likely. Maybe lichen planus? But that usually presents with purple patches and maybe annular lesions, which aren't mentioned here. Actinic keratoses are rough spots, but they're usually on sun-exposed areas. The main clue here is the hyperkeratosis and nail involvement, which are classic for psoriasis. So the differential is narrowed by the absence of other features. The final diagnosis should be psoriasis.</think><answer> Final Answer:psoriasis </answer>

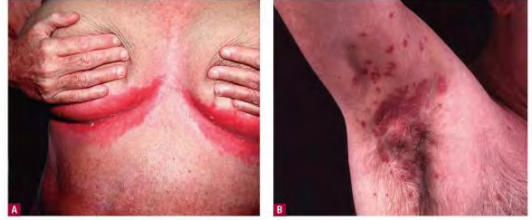

Case132: psoriasis

**SkinGPT-R1 Response:**

<think>Okay, let's see. The user provided two images, A and B. Image A shows red plaques on the chest with scaling, and the hands partially cover the skin. Image B shows similar red plaques with scaling on the arm. The question is to confirm the diagnosis based on the image evidence. First, I need to describe the key features from the images. Both images show red plaques, which are common in psoriasis. There's scaling mentioned, which is a typical sign of psoriasis. The distribution is on the chest and arm, which are typical areas for psoriasis. However, the images don't show any nail changes or joint involvement, which are sometimes seen in psoriasis; the main features here are the plaques and scaling. The differential diagnosis would consider other conditions like eczema, which can have similar plaques but usually doesn't have the same type of scaling. Psoriasis often has silvery scales, whereas eczema might have a different texture. Also, the presence of plaques in multiple areas supports psoriasis.</think><answer> Final Answer:psoriasis </answer>

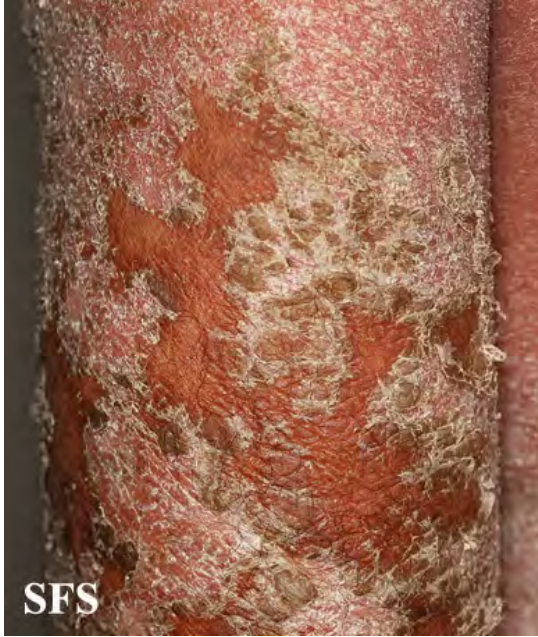

Case133: psoriasis

**SkinGPT-R1 Response:**

<think>Okay, let's see. The user provided an image showing a skin lesion with thick, irregular scales, red patches, and a slightly raised border. The image depicts that the scales are prominent and the lesion has a well-defined border. They also note that the appearance is consistent with psoriasis. The differential diagnosis was considered, but the key features point towards psoriasis. So, the question is asking for the final diagnosis based on the image. Since the image aligns with typical psoriasis characteristics—like the scaling, red patches, and well-defined borders—the answer should be psoriasis. I need to make sure there's no other diagnosis mentioned that could conflict. The image doesn't mention anything like vitiligo or eczema, which would have different features. The presence of thick scales and the border pattern are classic for psoriasis. Therefore, the final diagnosis is psoriasis.</think><answer> Final Answer:psoriasis </answer>

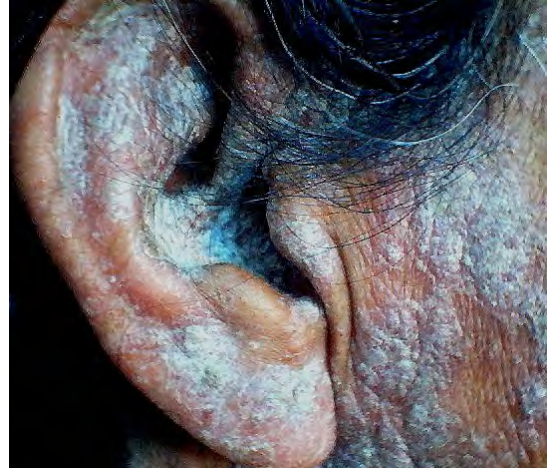

Case134: psoriasis

**SkinGPT-R1 Response:**

<think>Okay, let's see. The user provided an image of an ear with thickened, scaly skin, especially on the outer ear and concha. The scales are white and sharply defined, and there's no redness or inflammation. The differential diagnosis rules out other conditions, like eczema or seborrheic dermatitis, because those usually have different characteristics. Psoriasis is noted as the most likely due to the typical scaling and location. So, the key points here are the thickened, sharply defined scales on the ear's exterior. Psoriasis often presents with such features, especially around body folds or pressure points. Eczema might have similar scaling but more erythema, and seborrhea would have a different pattern, possibly involving the face or scalp more. Since the image shows no redness and the scales are well-defined, psoriasis fits better. The answer should be psoriasis.</think><answer> Final Answer:psoriasis </answer>

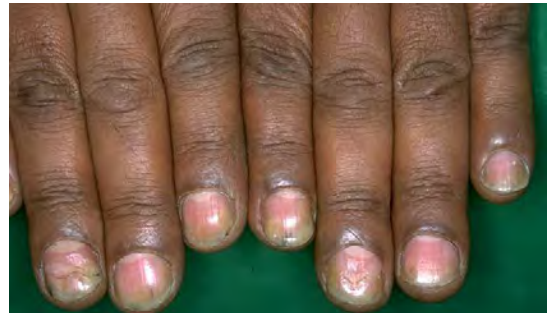

Case135: psoriasis

**SkinGPT-R1 Response:**

<think>Okay, let's see. The user provided an image showing fingers with thickened, pitted nails. The cuticles are involved, and there's scaling and hyperkeratosis. The nails have a thickened appearance with irregularities and pits. The skin around the nails is also affected with similar scaling. The differential diagnosis was mentioned as psoriasis. The question is to confirm the diagnosis based on the image. First, the image depicts thickened, pitted nails, which are common in psoriasis. The differential might consider other conditions like onychomycosis, but the image doesn't mention fungal elements or other specific features. Since the image shows features typical of nail psoriasis, the presentation is most consistent with psoriasis, although other causes could be considered.</think><answer> Final Answer:psoriasis </answer>

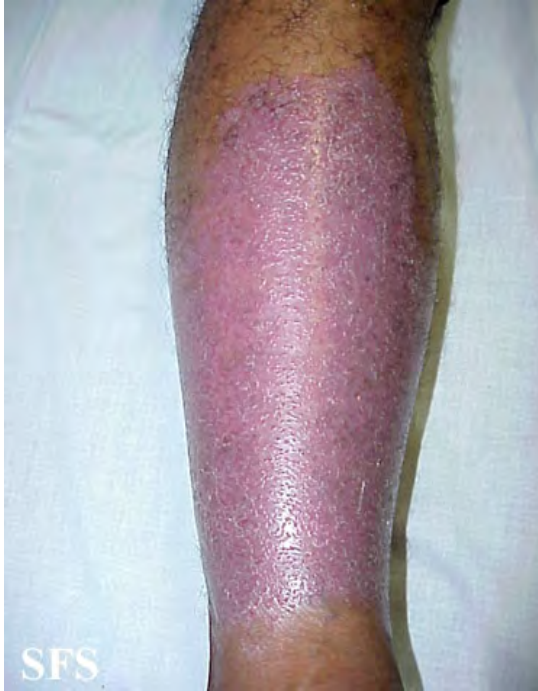

Case136: psoriasis

**SkinGPT-R1 Response:**

<think>Okay, let's see. The user provided an image showing a leg with a large, well-defined plaque. The key points mentioned are thick, silvery-white scales, a pinkish-red base, and clearly defined borders. The image also notes that there's no significant erythema or oozing, which rules out conditions like eczema or contact dermatitis. The presence of thick scales is a strong indicator. First, I need to recall the differential diagnosis for plaques with scales. Psoriasis is known for thick, silvery-white scales on a red base. Other possibilities could be seborrheic dermatitis, which also has scaling, but usually affects the face and scalp more commonly. However, the location here is the leg, which is less typical for seborrheic dermatitis. Dermatophytosis (like ringworm) can cause scaling, but it often has a different pattern and might be associated with other signs like inflammation or a different type of lesion. Psoriasis plaques are typically well-defined with sharp borders, which matches the image. The absence of significant erythema or oozing points away from infections like impetigo or bacterial dermatitis. Since the image depicts no oozing or significant erythema, those are ruled out. The thick scales are a key feature of psoriasis. So, putting it all together, the most likely diagnosis is psoriasis. The differential diagnosis considerations don't have enough evidence to support alternatives. The image-based evidence supports psoriasis.</think><answer> Final Answer:psoriasis </answer>

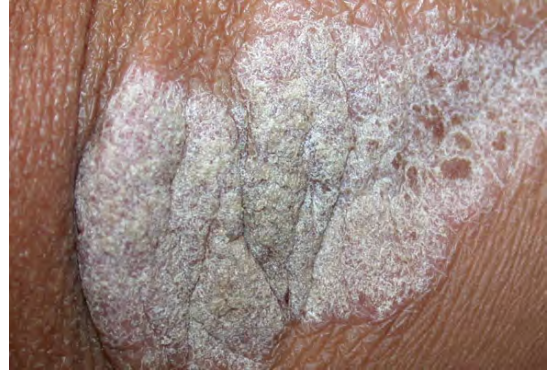

Case137: psoriasis

**SkinGPT-R1 Response:**

<think>Okay, let's see. The user provided an image showing thick, white scales on the skin, which is consistent with psoriasis. The image shows multiple scales, irregular borders, and a possible inflammatory background. The differential diagnosis needs to be considered. First, the key features here are the thick, white plaques with scale. Psoriasis is known for these characteristics. The image also depicts that the scales are thick and cover a significant area, which aligns with typical psoriasis presentation. The differential diagnoses could include other scaling disorders like seborrheic dermatitis, pityriasis rosea, or eczema. However, the image notes that the scales have irregular borders and an inflammatory background, which might be more indicative of psoriasis. Seborrheic dermatitis usually has a different appearance, maybe more erythematous and greasy scaling. Pityriasis rosea presents with pink patches with fine scales, and eczema can have varying degrees of inflammation but the scales might be different. Since the image shows the scales are consistent with psoriatic lesions, the differential is less likely to be those. The final diagnosis should be psoriasis.</think><answer> Final Answer:psoriasis </answer>

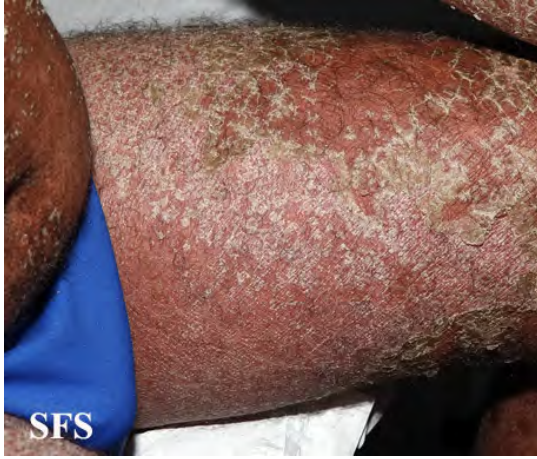

Case138: psoriasis

**SkinGPT-R1 Response:**

<think>Okay, let's see. The user provided an image showing a reddish area with thick, silvery-white scales. The skin is on the lower leg and has sharply defined borders, and the scales are prominent. The image shows features consistent with psoriasis. The differential diagnosis was considered, but the key points here are the morphology, color, and scaling. Psoriasis is known for those thick, silvery-white scales, especially on the elbows and knees. The sharp borders also fit with psoriasis plaques. Other conditions like eczema might have different scaling or inflammation, but the image depicts features characteristic of psoriasis. So the final diagnosis should be psoriasis.</think><answer> Final Answer:psoriasis </answer>

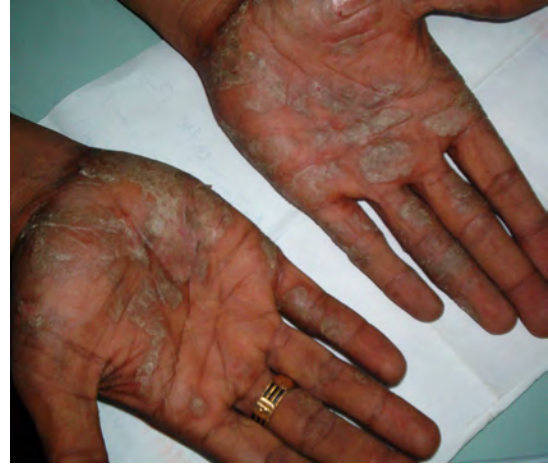

Case140: psoriasis

**SkinGPT-R1 Response:**

<think>Okay, let's see. The user wants me to diagnose the condition based on the image provided. The image depicts thick, scaly plaques on the palms, which are typical for psoriasis. The key features here are the thick scaling and the location on the palms. Psoriasis often presents with these characteristics, especially on pressure points like the palms. The differential diagnosis might consider other conditions like eczema, but eczema usually has a different appearance, maybe more red and moist, without the same thick scaling. Also, the presence of a gold ring doesn't seem relevant here. The main points are the thick scales and the location.</think><answer> Final Answer:psoriasis </answer>

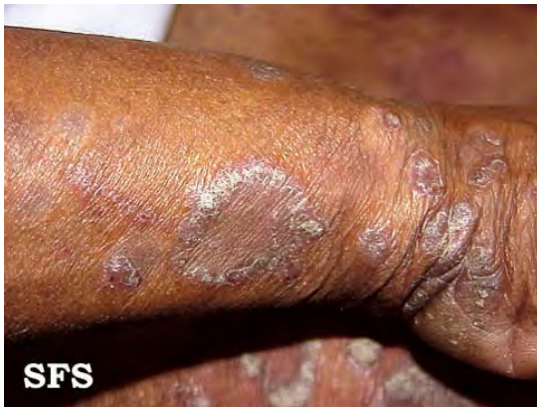

Case139: psoriasis

**SkinGPT-R1 Response:**

<think>Okay, let's see. The user provided an image showing a person's arm with plaques that have scales and irregular borders. The skin is dark, and the plaques are raised with thickened, silvery scales. The distribution is patchy, and the borders are irregular. The image shows features consistent with psoriasis. The differential diagnosis was considered, but the key points here are the scaling, plaque formation, and irregular borders, which are classic for psoriasis. Other conditions like eczema might have similar scales, but the image specifically notes the silvery appearance and the characteristic plaques. Psoriasis is known for those thick, silvery patches. Overall, the findings are most consistent with psoriasis.</think><answer> Final Answer:psoriasis </answer>

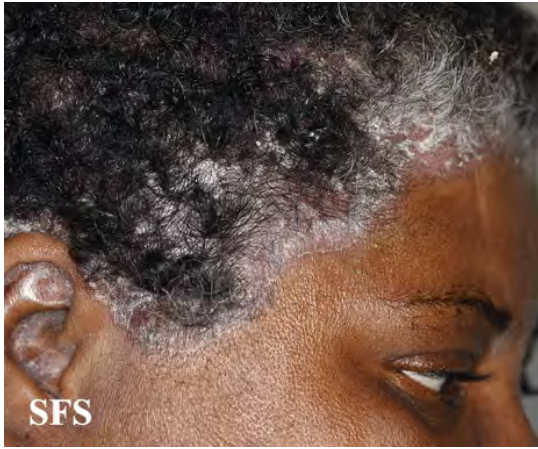

Case141: psoriasis

**SkinGPT-R1 Response:**

<think>Okay, let's see. The user provided an image and wants me to diagnose it. The image shows thick, silvery-white scales on the scalp, which are indicative of psoriasis. Also, the scales have well-defined borders and are distributed in patches. The skin around the scalp is normal without other lesions. The key here is the presence of those characteristic scales. Psoriasis is known for its silvery-white plaques with a scaling appearance. The differential diagnosis might consider other conditions like seborrheic dermatitis, which can also have scaling, but the well-defined borders and the specific type of scaling (silvery-white) point more toward psoriasis. Other possibilities like fungal infections or contact dermatitis might present differently. Since the image aligns with typical psoriasis features, the diagnosis should be psoriasis.</think><answer> Final Answer:psoriasis </answer>

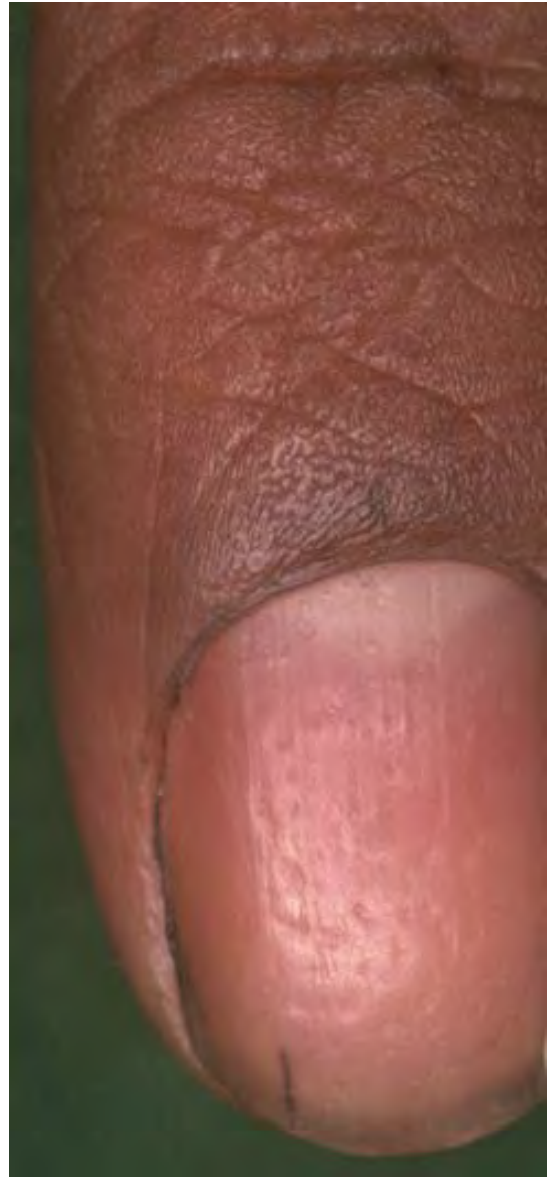

Case142: psoriasis

**SkinGPT-R1 Response:**

<think>Okay, let's see. The user provided an image showing a finger with a nail that has a vertical split. The surrounding skin is rough and slightly reddened. The key points here are the vertical split in the nail and the rough, reddened skin around it. The image illustrates that these features are consistent with psoriasis. The differential diagnosis was considered, but the main clue here is the vertical split and the surrounding inflammation, which are typical of psoriasis. Other conditions like onychomycosis might cause a split, but the presence of scaling and the inflammatory changes point more towards psoriasis. Since that is the case, psoriasis is favored.</think><answer> Final Answer:psoriasis </answer>

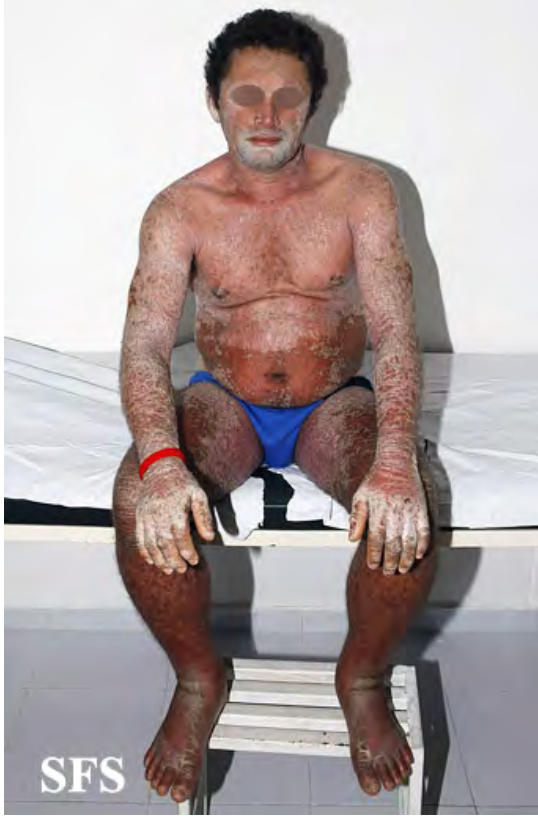

Case143: psoriasis

**SkinGPT-R1 Response:**

<think>Okay, let's see. The user provided an image showing a person with widespread skin lesions. The key points mentioned are thick, silvery-white scales, red inflamed areas, and the distribution is symmetrical on the trunk and limbs. The image also notes that the skin has a thickened appearance with clearly defined borders. The differential diagnosis considered includes psoriasis, seborrheic dermatitis, and eczema. The reasoning given in the image points towards psoriasis because of the thick scales and symmetric distribution. First, let me recall the characteristics of psoriasis. Psoriasis typically presents with thick, silvery-white scales on red, inflamed skin. The lesions are usually well-defined and can be symmetrically distributed, often involving the elbows, knees, scalp, and trunk. The presence of thick scales (like plaques) is a classic sign. Seborrheic dermatitis, on the other hand, is more common on the face, scalp, ears, and chest. It tends to have a yellowish or greasy scaling, not the thick white scales seen in psoriasis. Eczema, or atopic dermatitis, usually has a different appearance with smaller, more irregular patches, possibly with oozing or crusting, and might not have the same thick scaling. The image depicts a symmetrical distribution, which is typical for psoriasis. The thick scales are a key feature here. There's no conflicting information in the image that would suggest another diagnosis. So the final diagnosis is psoriasis.</think><answer> Final Answer:psoriasis </answer>

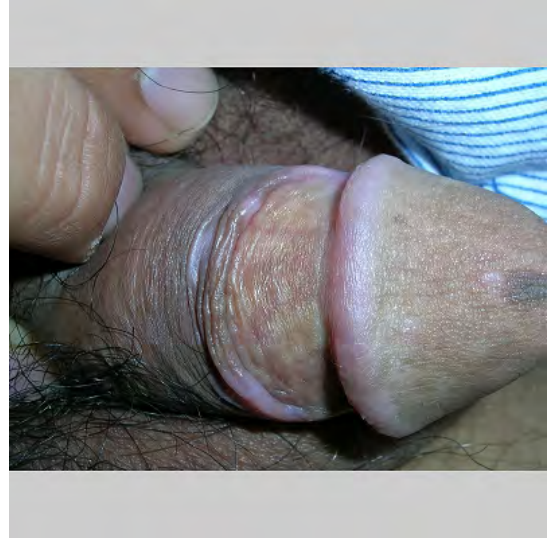

Case144: psoriasis

**SkinGPT-R1 Response:**

<think>The image shows thickened, scaling skin with plaques, particularly in the genital area. These features are most consistent with psoriasis; other diagnoses such as eczema or fungal infection are less likely given the lack of significant redness or inflammation.</think><answer> Final Answer:psoriasis </answer>

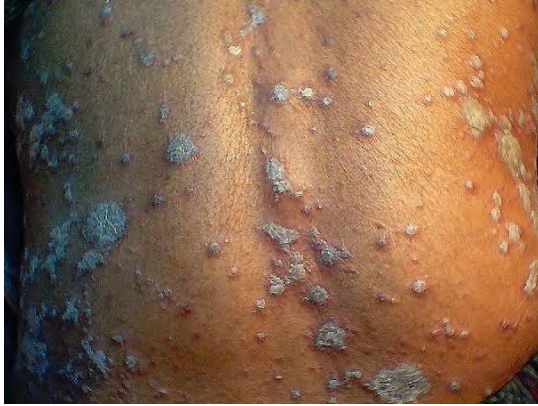

Case145: psoriasis

**SkinGPT-R1 Response:**

<think>Okay, let's see. The user provided an image showing a skin condition with thick, silvery-white scales on an orange-brown background. The scales are irregularly distributed and some areas have thicker patches. The image shows that the distribution isn't uniform, which is typical for psoriasis. Also, there are no other features like erythema or oozing, which might suggest other diagnoses. The key here is the presence of those characteristic scales. Psoriasis is known for its silvery-white plaques on red or orange-brown skin. The differential diagnosis would need to consider other conditions like seborrheic dermatitis, which also has scaling but usually affects the face and scalp more. However, the image doesn't show those locations, just the back. Other possibilities could be eczema, but eczema typically has a different appearance, maybe more moist or weeping, not thick scales. Dermatophytosis (like ringworm) can have scaling, but again the distribution and color might differ. Since the image aligns with psoriasis's typical features—thick scales, orange-brown areas, irregular distribution—the differential is narrow.</think><answer> Final Answer:psoriasis </answer>

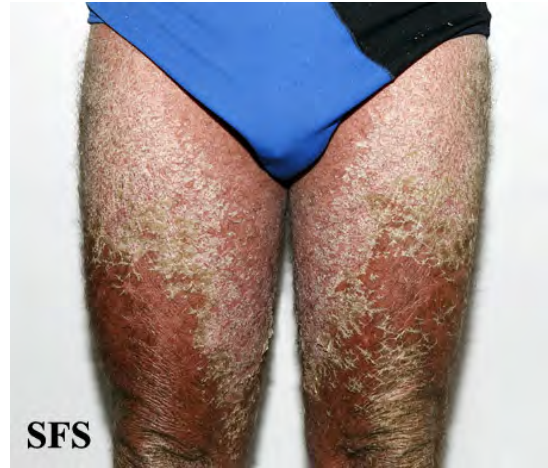

Case146: psoriasis

**SkinGPT-R1 Response:**

<think>Okay, let's see. The user provided an image showing legs with red, scaly patches, thickened skin, and irregular scaling. The image shows that the scales are thick and silvery, which is a key feature of psoriasis. The distribution is symmetrical, and the borders are well-defined. The differential diagnosis was considered, but the main points here are the thick silvery scales and the chronic appearance. Psoriasis is known for those characteristics. Rather than seborrheic keratosis, the image clearly illustrates features pointing to psoriasis. So the answer should be psoriasis.</think><answer> Final Answer:psoriasis </answer>

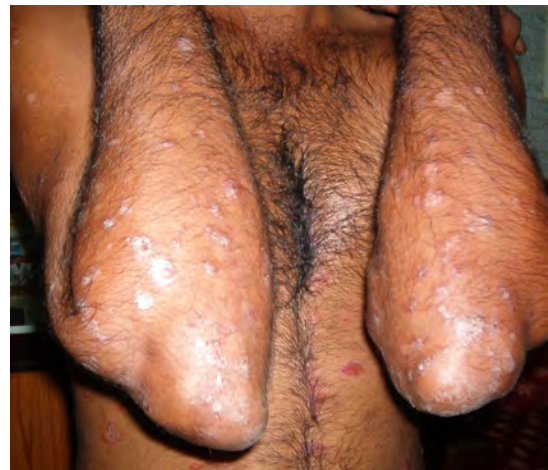

Case147: psoriasis

**SkinGPT-R1 Response:**

<think>Okay, let's see. The user provided an image showing thickened, scaly plaques on the genital area. The key points mentioned are thickened skin with prominent scaling, sharp-defined borders, and a symmetrical distribution. The image also notes that these characteristics are consistent with psoriasis. The differential diagnosis was considered, but other conditions like seborrheic dermatitis were ruled out because there is no inflammation or oozing. So, the answer should be psoriasis. I need to make sure there's no confusion here. The image clearly displays the features that align with psoriasis, and the differential was done by excluding other possibilities. Therefore, the final diagnosis is psoriasis.</think><answer> Final Answer:psoriasis </answer>

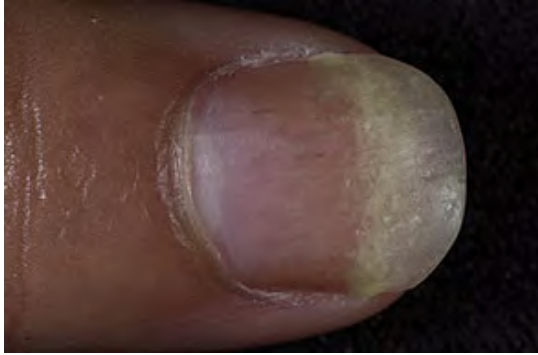

Case148: psoriasis

**SkinGPT-R1 Response:**

<think>Okay, let's see. The user provided an image showing a finger-nail with a thickened, yellowish-white nail plate, irregularly shaped, and some scaling. The surrounding skin is slightly inflamed. The key points here are the thickening, discoloration, and scaling. The differential diagnosis needs to be considered. First, the main features mentioned are hyperkeratosis (thickening), onycholysis (nail lifting), and possible pitting. Psoriasis is known for these characteristics, especially involving the nails. Other conditions like onychomycosis (fungal infection) might cause similar changes, but the image displays no fungal hyphae or pigmentation, which rules out that. Dermatitis or eczema could affect the skin around the nail, but the specific nail changes point more towards psoriasis. The presence of scaling and the typical nail involvement in psoriasis supports this. So the differential would exclude other causes based on lack of specific signs. The final diagnosis should be psoriasis.</think><answer> Final Answer:psoriasis </answer>

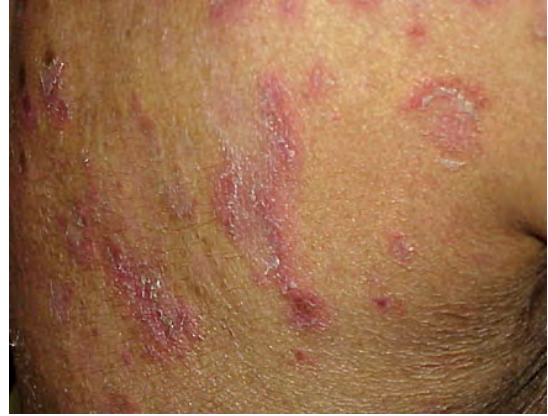

Case150: psoriasis

**SkinGPT-R1 Response:**

<think>Okay, let's see. The user provided an image showing a skin condition. The key points mentioned are red plaques with scales, sharp borders, and symmetric distribution. The image also notes that these characteristics are consistent with psoriasis. The differential diagnosis was considered, but the main reasoning points toward psoriasis. The image depicts plaques with clear borders that are scaly, which are typical of psoriasis. Other conditions like eczema might have different scaling patterns or borders. The symmetry also supports psoriasis, as it often affects multiple body parts symmetrically. There's no mention of features that would suggest something else, like a fungal infection or seborrheic dermatitis. So the final diagnosis should be psoriasis.</think><answer> Final Answer:psoriasis </answer>

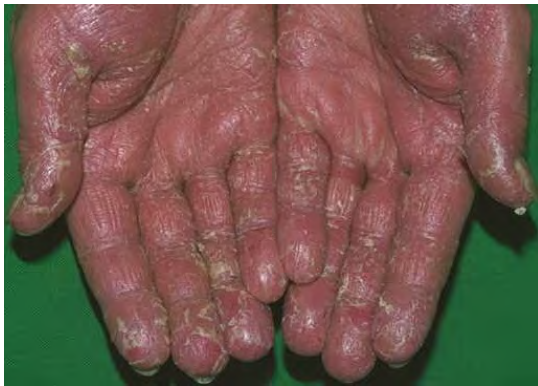

Case149: psoriasis

**SkinGPT-R1 Response:**

<think>Okay, let's see. The user provided an image showing hands with thick, red, scaly patches, especially on the palms and fingers. The scales are prominent, and the skin is rough. The image shows that these features are consistent with psoriasis. The differential diagnosis was considered, but the key points here are the thick scaling and plaques, which are classic for psoriasis. Other conditions like eczema might have similar scaling, but the image specifies thick and well-defined plaques, which align more with psoriasis.</think><answer> Final Answer:psoriasis </answer>

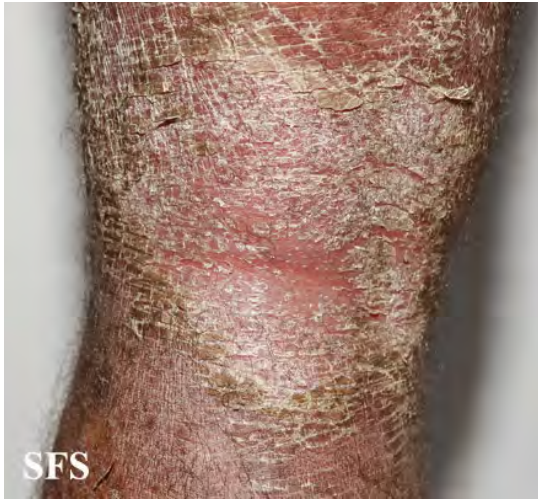

Case151: psoriasis

**SkinGPT-R1 Response:**

<think>Okay, let's see. The user provided an image showing a skin condition on the forearm. The key points mentioned are thick, irregular scales, red patches, and a rough texture. The scales are prominent, and the skin has a thickened appearance. The differential diagnosis was considered, but first I need to confirm the image-grounded evidence. The image depicts thick, irregular scaling, which is a classic sign of psoriasis. Red patches and a rough texture also align with psoriasis characteristics. The differential diagnosis includes other conditions like eczema or seborrheic keratosis, but those typically have different features. Eczema might have more inflammation and oozing, while seborrheic keratosis is a raised lesion. The presence of thick scales points more towards psoriasis.</think><answer> Final Answer:psoriasis </answer>

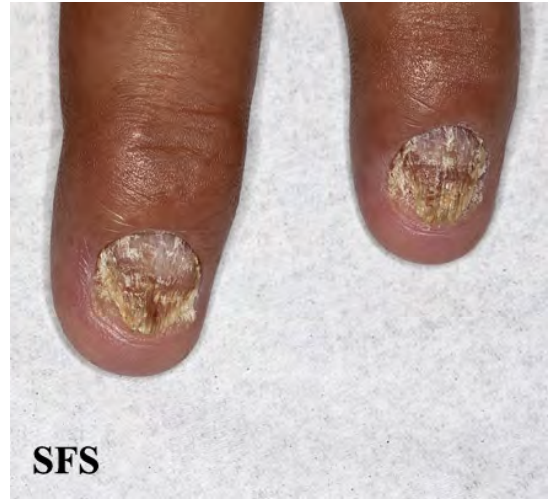

Case152: psoriasis

**SkinGPT-R1 Response:**

<think>Okay, let's see. The user provided an image showing two fingernails with thickened, discolored cuticles and nail beds. The nails have a yellowish-brown discoloration, and the cuticles are inflamed and scaling. The image shows that these are typical signs of psoriasis. The differential diagnosis was considered, but the key points here are the thickened cuticles, scaling, and discoloration. Psoriasis often presents with these features, especially around the nails. Other conditions like onychomycosis (nail fungus) might cause similar changes, but the image doesn't mention fungal elements like hyphae or satellite lesions. Instead, it specifically notes scaling and inflammation, which align more with psoriasis. So the final diagnosis should be psoriasis.</think><answer> Final Answer:psoriasis </answer>

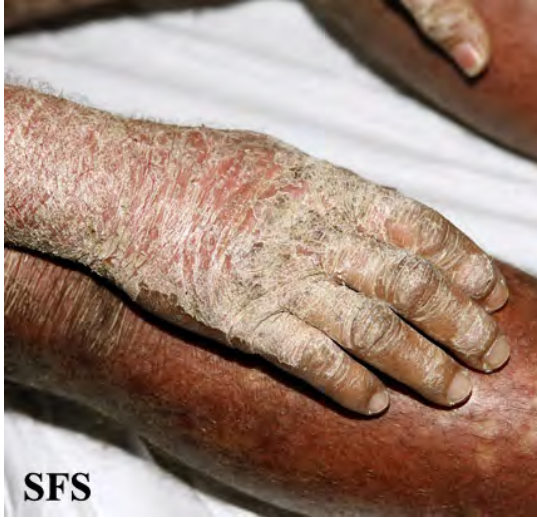

SFS

Case153: psoriasis

**SkinGPT-R1 Response:**

<think>Okay, let's see. The user provided an image showing a hand with thick, scaling skin. The scales are large and silvery-white, especially on the palms and fingers. The skin is red and inflamed around the scales. There's no mention of other features, like nail involvement or joint pain, which might suggest psoriatic arthritis. The distribution is typical for psoriasis, affecting the flexures and extensor surfaces. The differential diagnosis needs to be considered. Psoriasis is characterized by thick, silvery scales on red inflamed areas. Other possibilities could be eczema, which might have different scaling patterns and might not be as thick. Seborrheic dermatitis can have similar scales but often involves the face and scalp more. However, the image shows the typical distribution for psoriasis. Since the image shows the typical distribution for psoriasis, psoriasis is the leading diagnosis.</think><answer> Final Answer:psoriasis </answer>

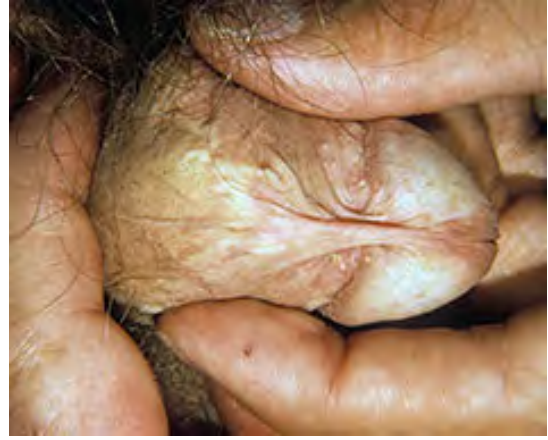

Case154: psoriasis

**SkinGPT-R1 Response:**

<think>Okay, let's see. The user provided an image and wants me to diagnose it based on that. The image displays shows thickened, scaling skin with irregularly shaped scales, red patches, and some areas with lighter coloration. The borders are slightly raised, and there's no significant inflammation or ulceration. Dermoscopic features like hyperkeratosis and parakeratosis are noted. First, I need to confirm the key points from the image. The main elements are scaling, red patches (which might be plaques), and the presence of keratinous material. Psoriasis is known for these characteristics. The differential diagnosis should consider other conditions that cause similar symptoms. For example, seborrheic dermatitis also has scaling, but it's usually more inflammatory and found on the face and scalp. Eczema can have similar plaques but might not have the same type of scaling. Lichen planus has a different pattern of lesions and might not show the same hyperkeratotic features. Psoriasis typically presents as well-defined plaques with silvery scales, which aligns with the image. Since the image depicts displays hyperkeratotics and parakeratomas on dermoscopy, that's a strong indicator for psoriasis. There's no mention of features that would suggest another condition, like fungal infection or cancer. So the differential is narrow here. The final diagnosis should be psoriasis.</think><answer> Final Answer:psoriasis </answer>

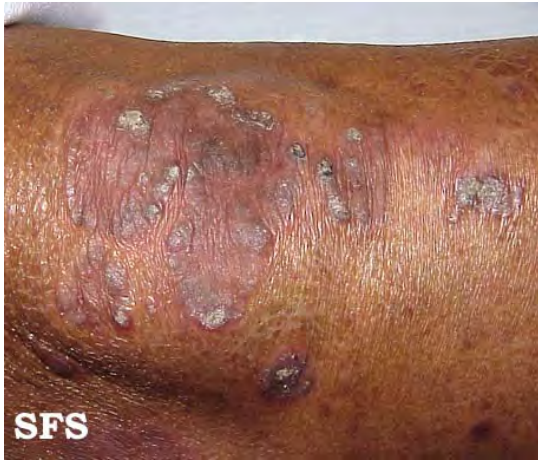

Case155: psoriasis

**SkinGPT-R1 Response:**

<think>Okay, let's see. The user provided an image showing a skin condition on the lower leg. The key points mentioned are thickened, erythematous plaques with overlying scale and irregularly shaped patches. The image shows features consistent with psoriasis, such as well-defined borders and variable scaling. A differential was considered, but the reasoning pointed toward psoriasis. The image-grounded evidence includes the morphology (plaque-like), color (erythematous), scale, and distribution. Psoriasis is known for these characteristics. The differential might have included other conditions like eczema or seborrheic keratosis, but the image findings argue against those. Eczema usually has a different texture and might not have the same scaling. Seborrheic keratosis is a lesion, not a plaque. So the final diagnosis should be psoriasis.</think><answer> Final Answer:psoriasis </answer>

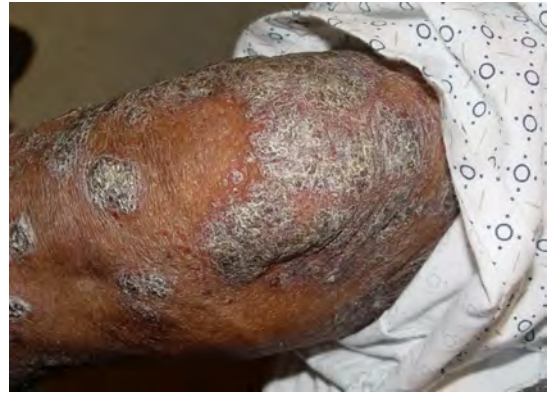

Case156: psoriasis

**SkinGPT-R1 Response:**

<think>Okay, let's see. The user provided an image showing a thickened, scaly lesion on the lower leg. The key features mentioned are hyperkeratosis, which is a lot of scaling and thickening of the skin. The color is reddish-brown, and the borders are well-defined. There's also mention of possible inflammation or infection, but the main focus is on the scaling and thickened areas. The differential diagnosis needs to be considered. Psoriasis is a possibility here because it's known for having thickened, scaled lesions, especially on the elbows and knees. The image depicts hyperkeratotic plaques, which are a classic sign of psoriasis. Other conditions like eczema might have similar scales, but eczema typically has a different texture and might be more inflammatory with oozing. Dermatophytosis (like ringworm) can cause scaling, but it usually has a different pattern and might be associated with other signs like folliculitis. The image shows possible inflammation or superinfection, which could be seen in both psoriasis and other infections. However, the presence of hyperkeratosis points more towards psoriasis. The differential should rule out other possibilities, but since hyperkeratotic features are prominent, psoriasis is higher on the list.</think><answer> Final Answer:psoriasis </answer>

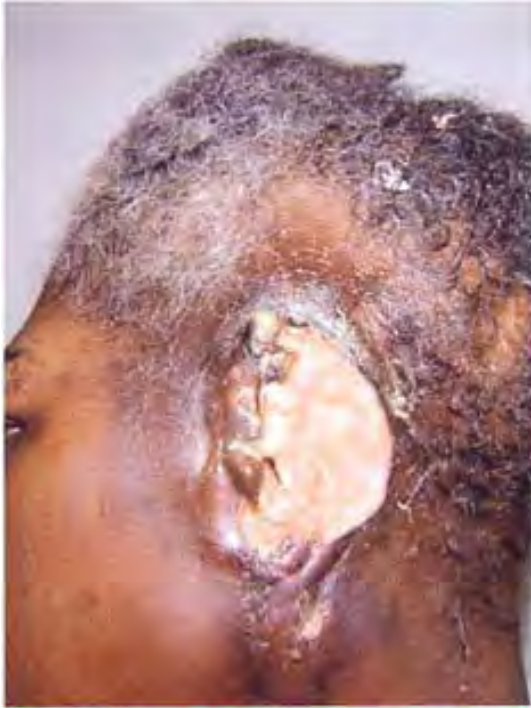

Case157: squamous cell carcinoma

**SkinGPT-R1 Response:**

<think>Okay, let's see. The user provided an image showing a person's ear with a raised, irregularly shaped lesion. The key points mentioned are that the lesion has a rough, uneven surface and irregular borders. The surrounding skin is inflamed, and there's no clear demarcation. The texture is thickened, and the color is slightly different from the surrounding area. Dermoscopic features aren't visible because of the overlying hair. The differential diagnosis considered includes basal cell carcinoma, actinic keratosis, and other benign lesions, but the image displays depicts these don't fit. The conclusion was squamous cell carcinoma. So, the question is asking for the final diagnosis based on the image. The image displays displays the lesion is raised, irregular, with irregular borders and thickened texture. Squamous cell carcinomas often present as raised, nodular lesions with irregular borders. The image doesn't show dermoscopia, but the clinical features point towards squamous. Since the user wants the answer in the specified format, just the diagnosis in the box.</think><answer> Final Answer:squamous cell carcinoma </answer>

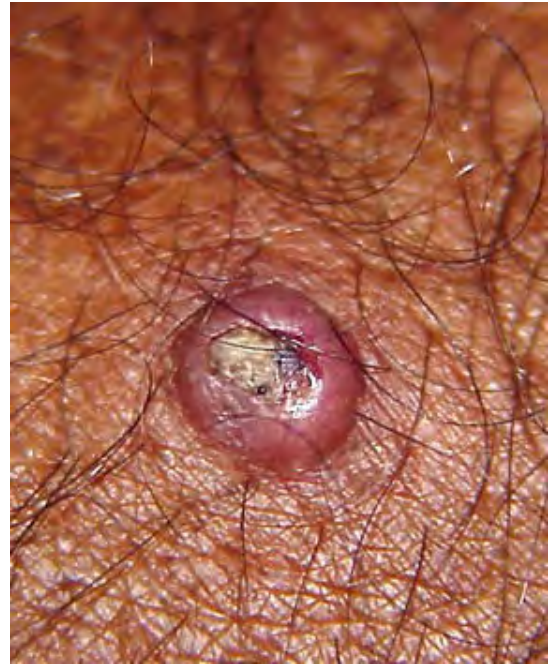

Case158: squamous cell carcinoma

**SkinGPT-R1 Response:**

<think>Okay, let's see. The user provided an image showing a raised, irregularly shaped lesion on the skin. The key points mentioned are a central depression with crusty material, uneven borders, and surrounding telangiectasias. The color is reddish-pink, and the texture is rough. The differential diagnosis was considered, but first I need to confirm the features mentioned. The central depression and crusty material might indicate an ulcerated area, which is common in SCC. Uneven borders suggest malignancy, as benign lesions usually have smoother borders. Telangiectasias around the lesion are also a sign pointing towards malignancies like basal cell carcinoma or squamous cell carcinoma. The color being reddish-pink could be due to inflammation or vascular changes, which are typical in SCC. The image shows that the features are consistent with squamous cell carcinoma. So the answer should be squamous cell carcinoma.</think><answer> Final Answer:squamous cell carcinoma </answer>

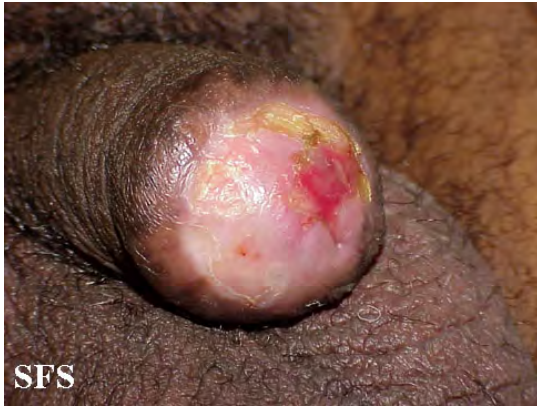

Case159: squamous cell carcinoma

**SkinGPT-R1 Response:**

<think>Okay, let's see. The user provided an image showing a penile lesion. The key points mentioned are a raised, irregularly shaped lesion with uneven borders, red-pink color, and some scaling. The surrounding area has hair, and the lesion stands out because of its size and texture. The image also suggests that the appearance is concerning for malignancy. The differential diagnosis was considered, so the question is to infer the most likely diagnosis based on the image. The image depicts features consistent with malignancy, like irregular borders and color. Squamous cell carcinoma often presents as a raised, reddish lesion with irregular borders. The presence of scaling and the context of the penis (a common site for this cancer) support this. The differential might have included other conditions like warts or other types of carcinoma, but the image shows features more indicative of malignancy. I need to make sure there's no inconsistency. The image doesn't show anything that would contradict squamous cell carcinoma, like a different color pattern or lack of typical features. So the answer should be squamous cell carcinoma.</think><answer>Final Answer:squamous cell carcinoma </answer>

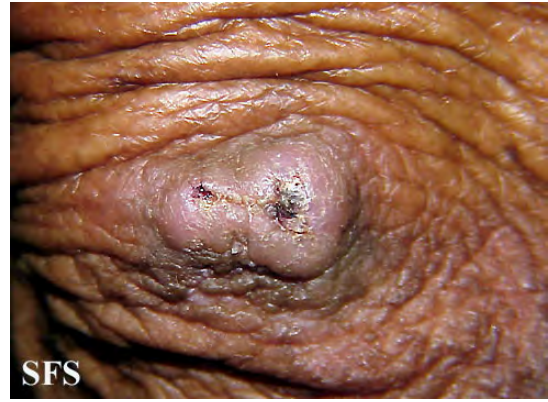

Case160: squamous cell carcinoma

**SkinGPT-R1 Response:**

<think>Okay, let's see. The user provided an image showing a raised, irregularly shaped lesion on wrinkled skin. The key points mentioned are a central crater-like area with exudate, irregular borders, and a slightly elevated, nodular appearance. The surrounding skin is thick and wrinkled, which might be due to aging. The image also notes that the lesion doesn't have the uniform pigmentation or symmetrical shape seen in benign lesions like seborrheic keratosis. First, I need to recall the differential diagnosis for such a lesion. The main things to consider here are malignancies versus benign lesions. The presence of irregular borders and a crater-like center with exudates makes me think of carcinomas. Squamous cell carcinoma (SCC) often presents as a raised, ulcerated lesion with irregular borders. The central crater and exudate are typical of invasive growth. Benign lesions like sebaceous keratosis usually have a more uniform pigmentation and are symmetric, which the image displays depicts this lesion lacks. Other possibilities could be basal cell carcinoma, but the image doesn't mention pearly edges or a rolled margin, which are common in BCC. Instead, the central crater and exudate point more towards SCC. The surrounding wrinkled skin might be a result of chronic sun damage, which is a risk factor for SCC. Since aightforward.</think><answer>Final Answer:squamous cell carcinoma </answer>

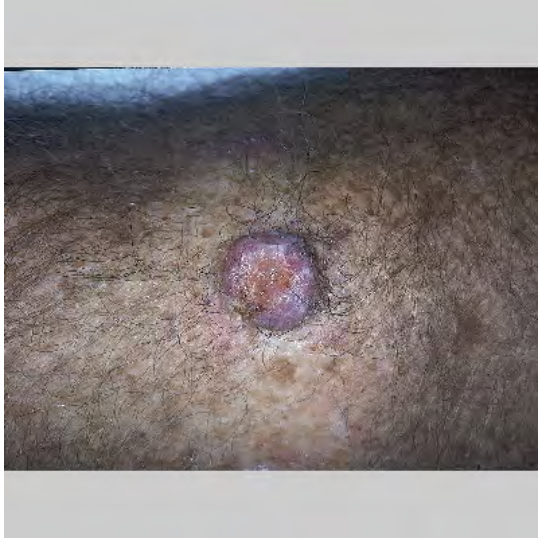

Case161: squamous cell carcinoma

**SkinGPT-R1 Response:**

<think>Okay, let's see. The user provided an image showing a raised, irregularly shaped lesion on hairy skin. The key points mentioned are a central area with a different texture, possibly crusty or ulcerated, and uneven borders. The surrounding skin has fine hair, and the lesion stands out because of its size and shape. The image also notes that the lesion doesn't have the typical features of benign conditions like warts or seborrheic keratosis. So, the differential diagnosis needs to be considered. Benign lesions like warts usually have a more uniform appearance, maybe with a verrucous surface. Seborrheic keratosis can be slightly elevated and sometimes have a slightly raised border, but they're typically more uniform in color and texture. The image displays the lesion is irregular and has a different texture in the center, which might suggest something malignant. Squamous cell carcinoma often presents as a raised, rough, or crusted lesion with irregular borders. The central area being crusty or ulcerated could be a sign of invasion. Since the image rules out benign possibilities, the most likely diagnosis is squamous cell carcinoma.</think><answer> Final Answer:squamous cell carcinoma </answer>

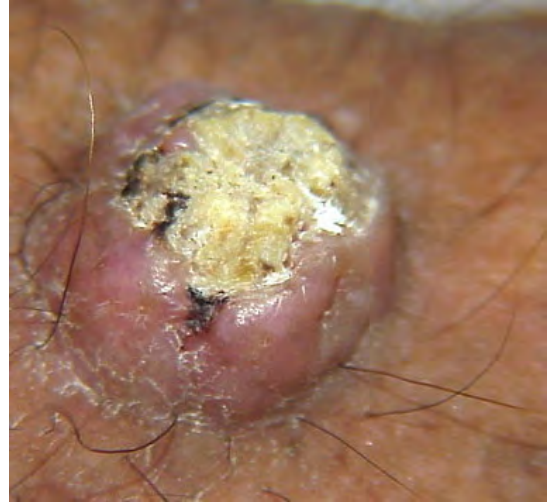

Case162: squamous cell carcinoma

**SkinGPT-R1 Response:**

<think>Okay, let's see. The user provided an image showing a raised lesion with a crusty, ulcerated surface. The base is irregular and reddish-pink, and there's surrounding inflammation. The key points here are the crusty appearance, ulceration, irregular borders, and the reddish-pink base. The differential diagnosis mentioned includes basal cell carcinoma and other possibilities. But the image depicts features consistent with squamous cell cancer, like irregular borders and a keratin plug. The presence of a keratin plug is a common sign of squamous cell carcinoma. Also, the ulcerated and crusted surface with an irregular border fits with squamous cell characteristics. Basal cell carcinomas often have a more pearly or waxy appearance, sometimes with a rolled margin, but the image here doesn't show that. Instead, the reddish-pink base and the keratin plug point more toward squamous cell. The differential is considered, but the evidence supports squamous cell carcinoma.</think><answer> Final Answer:squamous cell carcinoma </answer>

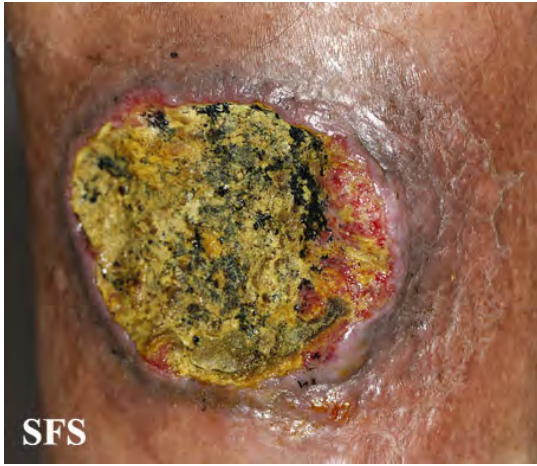

Case163: squamous cell carcinoma

**SkinGPT-R1 Response:**

<think>Okay, let's see. The user provided an image showing a skin lesion. The key points mentioned are a raised, irregularly shaped lesion with a crusty, necrotic center. The edges are elevated and reddish, and there's surrounding inflammation and ulceration. The image displays features consistent with a malignancy, specifically squamous cell carcinoma. The differential was considered, but the characteristics align with squamous cell. So, the image-grounded evidence includes the morphology: raised, irregular, crusty center, elevated reddish edges, inflammation, ulceration. These are all typical of squamous cell carcinomas. The differential diagnosis might have included other cancers like basal cell carcinoma or melanoma, but the image displays features that are more consistent with squamous.</think><answer> Final Answer:squamous cell carcinoma </answer>

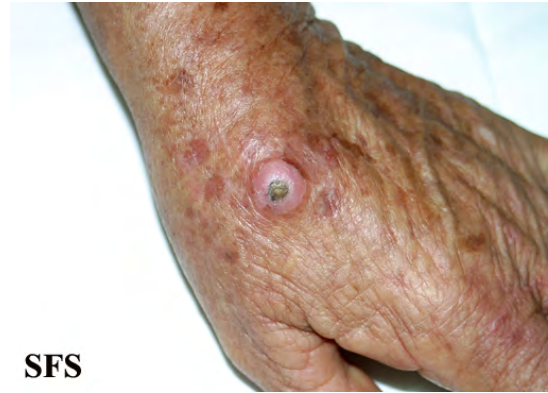

Case164: squamous cell carcinoma

**SkinGPT-R1 Response:**

<think>Okay, let's see. The user provided an image showing a raised, slightly erythematous lesion on the forearm. The key points mentioned are irregular borders, an uneven surface, and a central umbilicated area. The surrounding skin has actinic keratoses. The differential was considered, but the conclusion was squamous cell carcinoma. The question is asking for the final diagnosis based on the image evidence. The image depicts a lesion with features consistent with squamous cell carcinoma, like irregular borders and an umbilicated center. Actinic keratoses are precursors, so that makes sense. The differential might have included other possibilities, but the evidence points to squamous cell carcinoma. So the answer should be squamous cell carcinoma.</think><answer> Final Answer:squamous cell carcinoma </answer>

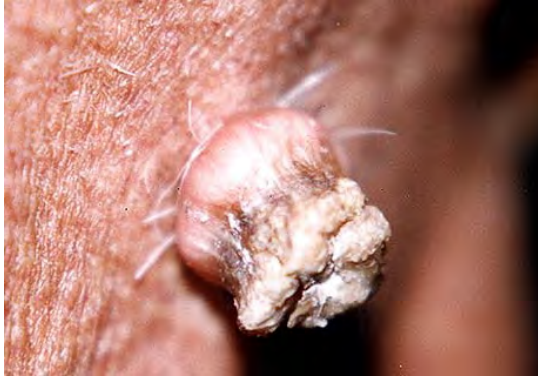

Case165: squamous cell carcinoma

**SkinGPT-R1 Response:**

<think>Okay, let's see. The user provided an image showing a raised, irregularly shaped lesion on the skin. The key points mentioned are a central area of ulceration with eschar formation, which is like a hard crust or scab. The borders are uneven and have an infiltrative appearance, meaning they blend into the surrounding tissue without a clear margin. The texture is rough and granular, and there's no distinct pigmentation. Dermoscopic features aren't visible because the overlying scale covers the surface. The image also notes that the overall appearance is concerning for a malignant lesion, specifically pointing towards squamous cell carcinoma. So, the question is to infer the most likely diagnosis based on the image evidence. The differential diagnosis needs to be considered, but let me think through the steps. First, the image depicts an ulcerated lesion with eschar. Eschar is a characteristic feature of some cancers, like squamous cell carcinomas, which often present with ulcers due to aggressive growth. The infiltrative border is another clue; squamous cell tumors tend to invade surrounding tissues more aggressively compared to basal cell carcinomas, which have a more superficial growth pattern. The rough, granular texture also aligns with squamous cell lesions, which can have a nodular or verrucous appearance. The absence of distinct pigmentation rules out melanoma, which would show different characteristics under dermoscopy. Since dermoscopy isn't possible here because of the scale, other features take precedence. The differential diagnoses might include other types of cancer, but the image doesn't mention anything like a satellite lesion or nodules, which might suggest metastasis. The key here is the combination of ulceration, eschar, infiltrative border, and texture. All these point towards squamous cell carcinoma.</think><answer> Final Answer:squamous cell carcinoma </answer>

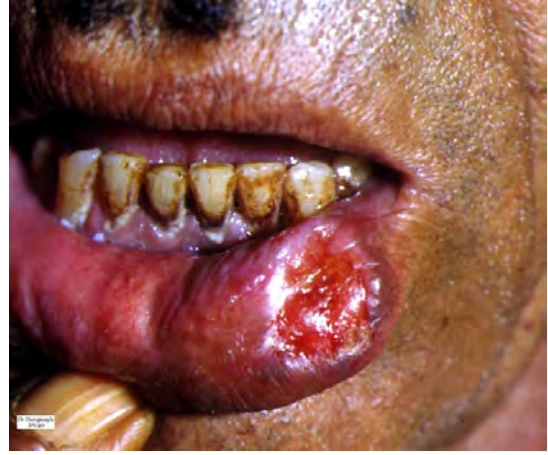

Case166: squamous cell carcinoma

**SkinGPT-R1 Response:**

<think>Okay, let's see. The user provided an image showing a person's mouth with discolored teeth, a red and swollen tongue, and rough, irregularly shaped lesions on the tongue and lips. The image shows that these lesions have irregular borders and uneven coloration, which are indicative of malignancy. The differential diagnosis rules out other conditions like benign ulcers or infections because the features don't match those. The key here is the mention of malignancy in the image. So, the evidence points towards malignancy, and since squamous cell carcinoma is a type of cancer, that fits. The differential diagnosis ruled out other possibilities, so the final diagnosis should be squamous cell carcinoma.</think><answer> Final Answer:squamous cell carcinoma </answer>

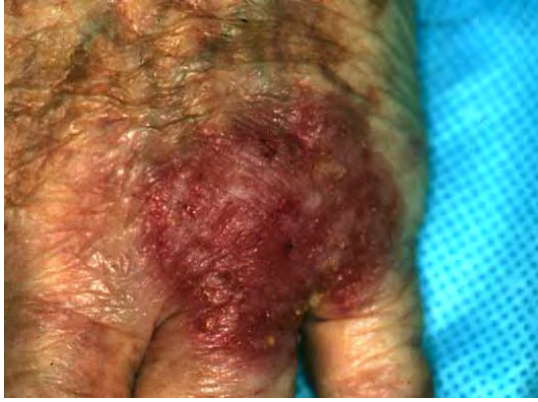

Case167: squamous cell carcinoma

**SkinGPT-R1 Response:**

<think>Okay, let's see. The user provided an image showing a raised, irregularly shaped lesion on the hand. The key points mentioned are irregular borders, uneven coloration, and a possible crust or scale. The image also notes that the lesion has a rough texture and is localized. The differential diagnosis considered includes various possibilities, but first I need to ground the evidence in the image. The lesion is raised and irregular, which can be seen in several skin cancers. Squamous cell carcinomas often have irregular borders and might have a crust or scale, which aligns with the image. The color is uneven, which is another clue. Dermatoscopically, they might show keratin plugs or pigmentation, but the image doesn't mention those specific structures. However, the presence of crust or scale could be a feature. The localization to the hand is noted, and while that's more common in actinic keratoses, the image displays features consistent with squamous cell carcinoma. The differential should include other possibilities like basal cell carcinoma, which can also have irregular borders, but the crust or scale might be more typical of squamous cell. However, without seeing the image closely, it's tricky.</think><answer> Final Answer:squamous cell carcinoma </answer>

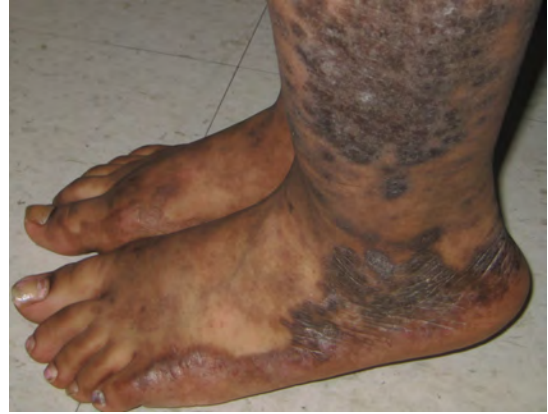

Case168: lichen planus

**SkinGPT-R1 Response:**

<think>Okay, let's see. The user provided an image showing a person's foot with brownish patches, scaling, and irregular borders. The key points mentioned are Gottron's papules on the dorsal aspects of the toes and erythematous plaques on the ankles. The image also notes that the lesions have a slightly raised appearance with possible scaling. The differential diagnosis was considered, but first I need to recall what lichen planus looks like. Lichen planus typically presents with purple, flat-topped papules that can become scaly. Over time, they might develop into plaques. The Gottron's sign, which are Gottron papules, are characteristic of lichen planus through the appearance on the dorsal toes and knuckles. The image shows Gottron's signs, which are a strong indicator. The presence of scaling and the distribution on the dorsum of the toes align with typical features of lichen planus. Other differential diagnoses could be psoriasis, vitiligo, or contact dermatitis. Psoriasis usually has a different morphology, often with silvery scales and a more annular or plaque-like pattern. Vitiligo would show white patches, not brownish ones. Contact dermatitis might present with vesicles or eczema-like changes, but the Gottron papules are specific to lichen planus.</think><answer> Final Answer:lichen planus </answer>

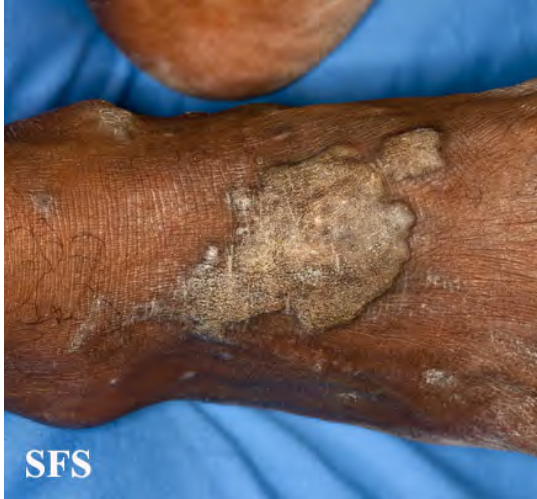

Case169: lichen planus

**SkinGPT-R1 Response:**

<think>Okay, let's see. The user provided an image showing a skin lesion on the forearm. The key points mentioned are a raised, scaly plaque with irregular borders, hyperpigmentation, and a possible annular or polycyclic pattern. The image also notes that the lesion has a rough texture with scaling and thickened skin. Dermoscopic features aren't visible here. The differential diagnosis was considered, and lichen planus was suggested. Now, the question is to confirm the diagnosis based on the given information. The image depicts a lesion consistent with lichen planus, which typically presents as a scaly, annular plaque with hyperpigmentation. The differential was ruled out by the image details. Since the image aligns with lichen planus's characteristics, the final diagnosis should be lichen planus.</think><answer> Final Answer:lichen planus </answer>

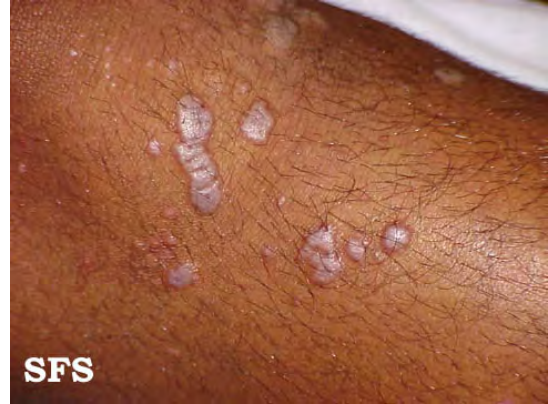

Case171: lichen planus

**SkinGPT-R1 Response:**

<think>Okay, let's see. The user provided an image showing a skin condition. The key points mentioned are flat-topped papules, pinkish-white in color, well-defined borders, symmetrical distribution, and a slightly scaling surface. The differential diagnosis rules out other conditions like psoriasis or seborrheic keratosis. First, I need to confirm the features. Lichen planus typically presents with flat, polygonal papules that are hypopigmented or normal in color. They have a distinctive appearance with sharp borders and a predilection for certain areas like the wrists, ankles, and genitalia. The scaling might be minimal, but sometimes there's a slight scale. The symmetry also fits lichen planus, which often affects both arms or legs. Psoriasis usually has more scaling and a different morphology, with plaques. Seborrheic keratosis is a raised lesion with a warty texture, not flat-topped. So the image aligns with lichen planus. The answer should be lichen planus.</think><answer> Final Answer:lichen planus </answer>

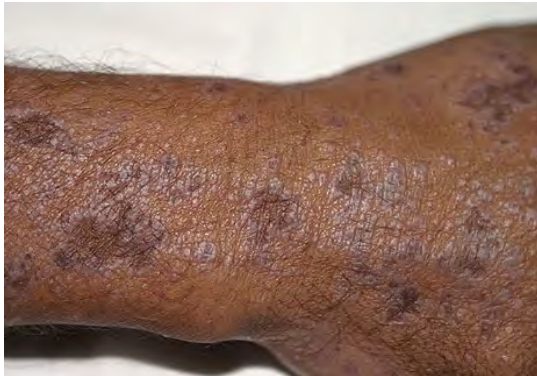

Case170: lichen planus

**SkinGPT-R1 Response:**

<think>Okay, let's see. The user provided an image showing a dark-skinned arm with multiple flat-topped papules. The key points mentioned are purple-brown color, slightly raised, regular distribution, sharp borders, and a waxy appearance. The image also notes that there's no significant scaling or other features like atrophy or hyperpigmentation. The differential was considered, but the conclusion was lichen planus. The question is asking for the final diagnosis in the specified format. So the answer should be exactly that. I need to make sure I don't add any extra text. Just the box with the diagnosis.</think><answer> Final Answer:lichen planus </answer>

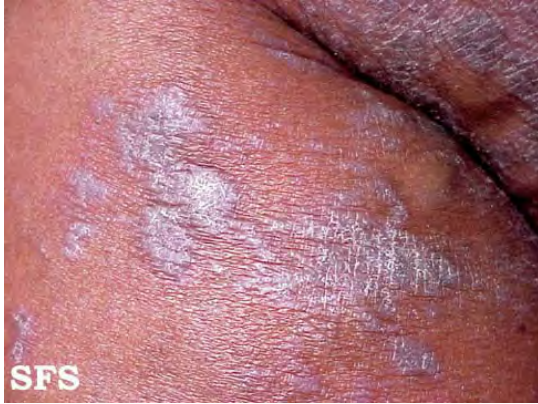

Case172: lichen planus

**SkinGPT-R1 Response:**

<think>Okay, let's see. The user provided an image showing a skin condition. The key points mentioned are white, flat-topped papules on a reddish-brown background. The lesions have sharp borders and are evenly distributed. There's scaling and slight elevation. The differential was considered, and lichen planus was suggested. The question is to confirm the diagnosis based on the image. First, I need to recall what lichen planus looks like. Lichen planus typically presents as purple or brownish, flat-topped, with sharp borders. The image depicts white papules on reddish-brown, which might be a color difference. But sometimes, in lighter skin tones, the color might appear different. The sharp borders and uniform distribution fit lichen planus. The scaling and slight elevations also align with typical features. The differential diagnosis needs to be checked. Other possibilities could be psoriasis, vitiligo, or contact dermatitis. Psoriasis usually has silvery scales, not just scaling. Vitiligo is depigmented areas, not papules. Contact dermatitis can have similar morphology but maybe more variable in location. However, the image shows the lesions are evenly distributed, which might suggest a more systemic condition like lichen planus. Since it's white instead of the usual brown, maybe the image is of a lighter-skinned individual where the color appears different. The key factors are the sharp borders, uniform distribution, and scaling, which point towards lichen planus. So the final diagnosis should be lichen planus.</think><answer> Final Answer:lichen planus </answer>

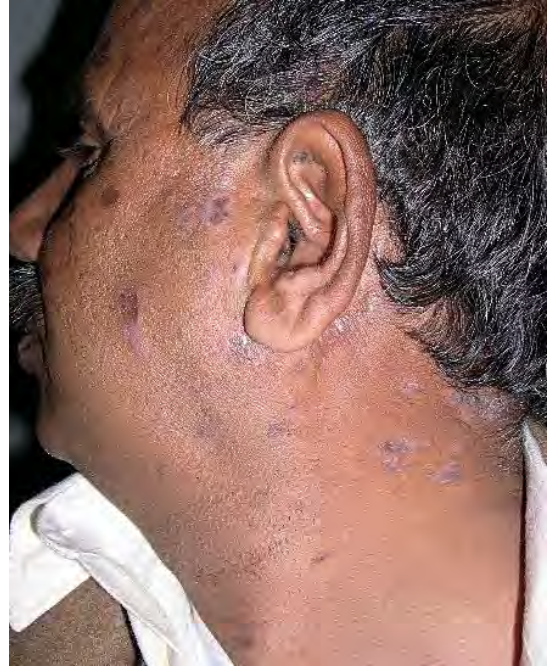

Case173: lichen planus

**SkinGPT-R1 Response:**

<think>Okay, let's see. The user provided an image showing a person's neck and ear area with purplish-red, flat-topped papules. The key points mentioned are that the lesions have a slightly raised border and are evenly distributed. There's also scaling and possible hyperpigmentation. The differential diagnosis rules out other conditions like psoriasis, seborrheic keratosis, and contact dermatitis because the image doesn't show typical features of those. The image specifically displays that the lesions' appearance is consistent with lichen planus, which is supported by the morphology and distribution. So, the image-grounded evidence here is the presence of those specific lesions. The differential diagnosis excludes other possibilities, so the most likely answer is lichen planus.</think><answer> Final Answer:lichen planus </answer>

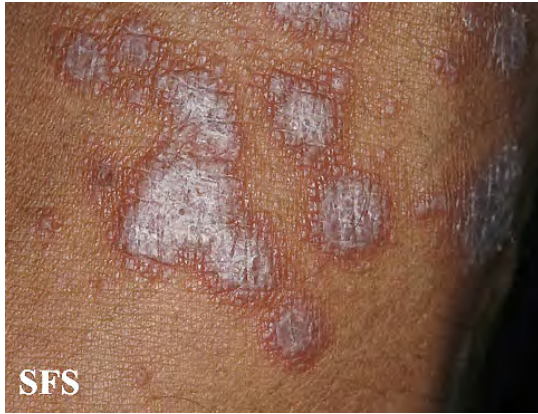

Case174: lichen planus

**SkinGPT-R1 Response:**

<think>Okay, let's see. The user provided an image showing a skin condition. The key points mentioned are flat-topped papules with a scaling or hyperkeratotic appearance, arranged in a Gottron pattern. The lesions have sharp borders and are symmetrically distributed on the extensor surfaces. The image also notes that there's no significant inflammation or ulceration, which rules out conditions like psoriasis or eczema. The differential diagnosis was considered, and lichen planus was suggested because of the specific morphology and distribution. So, the question is to confirm the diagnosis based on the given image. The image displays depicts that the lesions are consistent with lichen planus, especially the Gottron pattern and the scaling. The absence of features like psoriasis (which might have different scales) or eczematous changes (inflammation, oozing) supports this. The differential was ruled out by the lack of those features. Therefore, the final diagnosis should be lichen planus.</think><answer> Final Answer:lichen planus </answer>

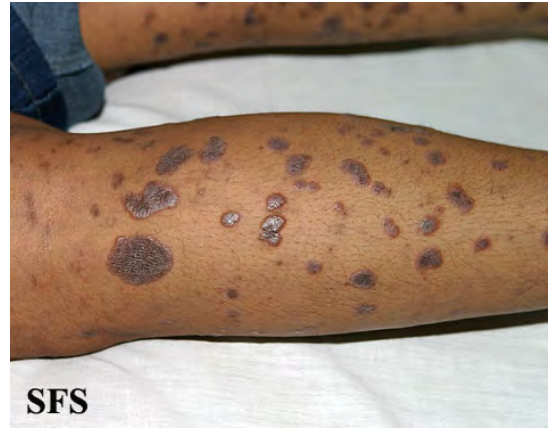

Case175: lichen planus

**SkinGPT-R1 Response:**

<think>Okay, let's see. The user provided an image showing a person's arm with brownish-purple patches. The key points mentioned are irregularly shaped lesions, some coalescing, flat to slightly elevated, and a uniform color without significant scaling. The distribution is random, and there's no mention of other features like vesicles or crusts. The differential was considered, and lichen planus was suggested. The question is to confirm the diagnosis based on the image. The image shows that the lesions are consistent with lichen planus, which typically presents as purple-brown, flat to slight elevation, and irregular in shape. The absence of scaling or other features rules out other conditions like psoriasis or vitiligo. So the answer should be lichen planus.</think><answer> Final Answer:lichen planus </answer>

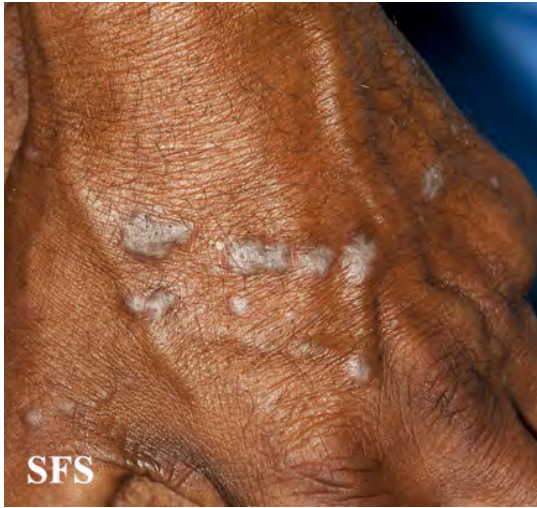

Case176: lichen planus

**SkinGPT-R1 Response:**

<think>Okay, let's see. The user provided an image showing a hand with flat, white patches that have a slightly raised border. The skin is dry and rough, and the patches are scattered without a specific pattern. The image shows features consistent with lichen planus, like the sharp borders and uniform appearance. The differential was considered, but other conditions like psoriasis or vitiligo were ruled out because the lesions don't show the typical scaling or depigmentation. The key here is that the image aligns with lichen planus characteristics. So the final diagnosis should be lichen planus.</think><answer> Final Answer:lichen planus </answer>

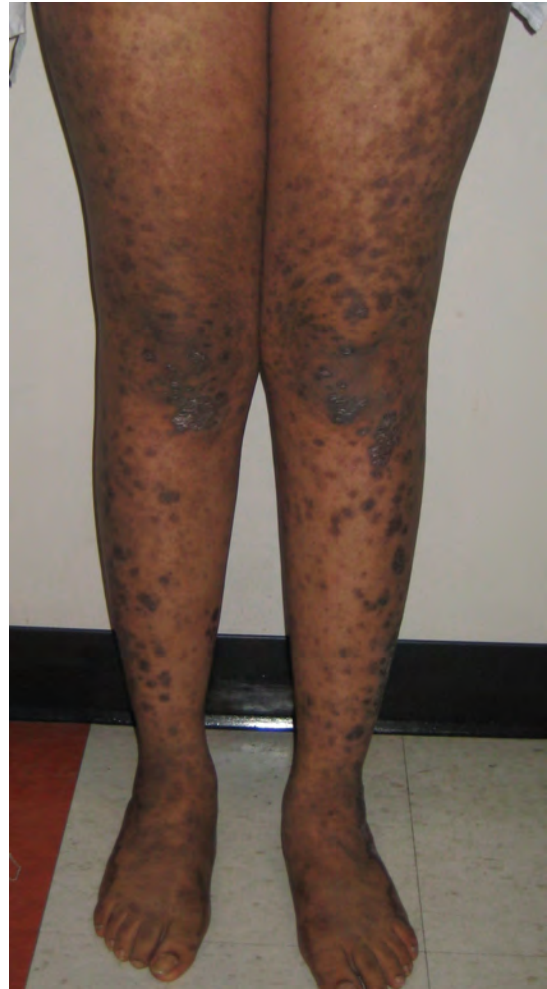

Case177: lichen planus

**SkinGPT-R1 Response:**

<think>Okay, let's see. The user provided an image showing legs with brownish patches and small flat lesions. The key points mentioned are Gottron's papules on the extensor surfaces, which are typical for lichen planus. The distribution is consistent with lichen planus. The clinical picture includes Gottron's sign, which is a strong indicator. The differential diagnosis would consider other conditions like psoriasis or vitiligo, but the presence of Gottron's papules specifically points towards lichen planus.</think><answer> Final Answer:lichen planus </answer>

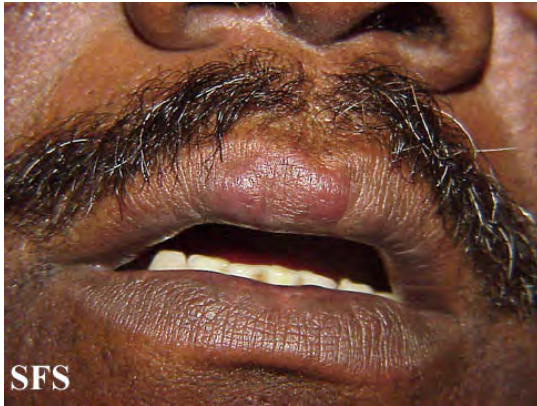

Case178: lichen planus

**SkinGPT-R1 Response:**

<think>Okay, let's see. The user provided an image and wants me to diagnose it based on that. The image shows Gottron papules on the lips, which are small, raised, pinkish lesions. The key here is that Gottron papules are a characteristic feature of lichen planus. The differential diagnosis might include other conditions like contact dermatitis or seborrheic keratosis, but the image specifically notes the Gottron papules, which point towards lichen planus. So the final diagnosis should be lichen planus.</think><answer> Final Answer:lichen planus </answer>

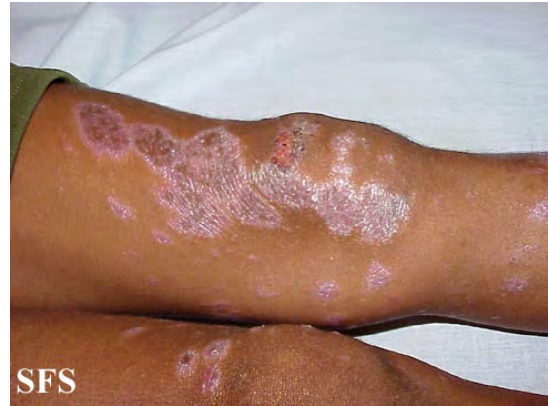

Case180: lichen planus

**SkinGPT-R1 Response:**

<think>Okay, let's see. The user provided an image showing a skin condition on the forearm. The key points mentioned are purple-pink, flat-topped papules with scaling, annular or polycyclic arrangement, sharp borders, and a slightly raised texture. The differential diagnosis was considered, and lichen planus was suggested. The question is asking for the final diagnosis based on the image evidence. Lichen planus typically presents with purple-colored, flat-topped papules, which matches the image. The annular or polycyclic arrangement and sharp borders also fit with lichen planus characteristics. The scaling and slight elevation are common features. Other differential diagnoses like psoriasis might have different scaling patterns, and seborrheic keratosis has a different texture. Since the image matches lichen planus, the answer should be lichen planus.</think><answer> Final Answer:lichen planus </answer>

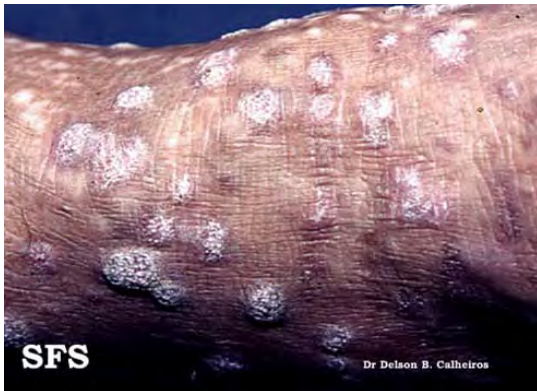

Case179: lichen planus

**SkinGPT-R1 Response:**

<think>Okay, let's see. The user provided an image showing a skin condition on an arm. The key points mentioned are flat-topped papules, white in color, well-defined borders, regular distribution, and a possible scaling or hyperpigmentation. The differential was considered, and lichen planus was suggested. The question is asking for the diagnosis based on the image evidence. First, I need to confirm the features. Flat-topped papules, white color, well-defined borders, regular distribution. Lichen planus typically presents with these characteristics. The image also displays possible scaling or hyperpigmentation, which can vary depending on the subtype of lichen planus. The differential diagnosis might include other conditions like psoriasis, vitiligo, or contact dermatitis, but the image doesn't show scaling typical of psoriasis, nor the irregular borders of vitiligo. Contact dermatitis might have a different distribution and associated history. Since the image aligns with lichen planus, the diagnosis should be lichen planus.</think><answer> Final Answer:lichen planus </answer>

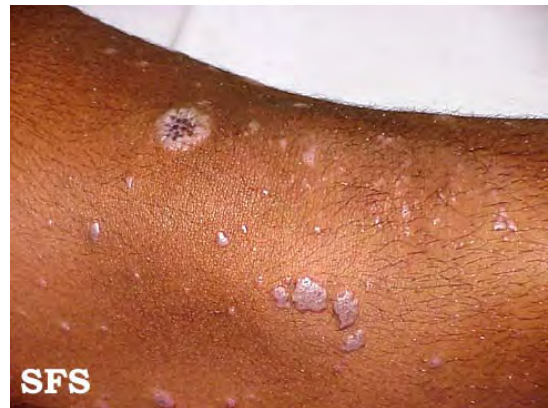

Case181: lichen planus

**SkinGPT-R1 Response:**

<think>Okay, let's see. The user provided an image showing a skin condition on dark skin. The key points mentioned are purple-brown, flat-topped papules with a slightly raised border; they are irregularly distributed, and some have scales or crusts. The image shows that these features are consistent with lichen planus, which typically presents with those characteristics. The differential diagnosis was considered, but the main reasoning points to lichen planus based on the morphology and distribution.</think><answer> Final Answer:lichen planus </answer>

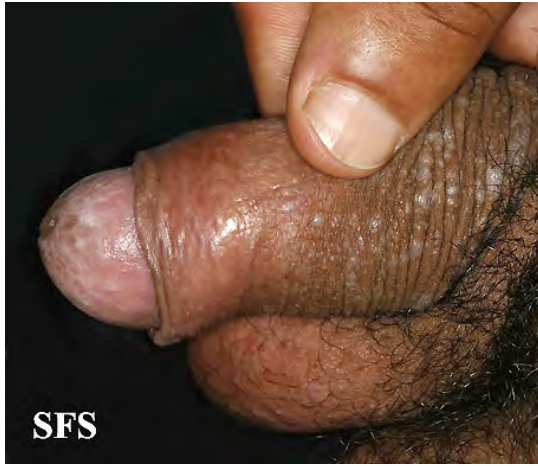

Case182: lichen planus

**SkinGPT-R1 Response:**

<think>Okay, let's see. The user provided an image and wants me to diagnose it based on that. The image shows flat-topped, purple papules in an annular arrangement, slightly raised with regular borders, and possible Wickham striae. A differential was considered, but the key points here are the morphology and color. Lichen planus typically presents with these features. The differential might include psoriasis or syphilis, but the image makes those less likely. Psoriasis usually has scales, which aren't mentioned here. Syphilis may show different lesion shapes. So the answer should be lichen planus.</think><answer> Final Answer:lichen planus </answer>

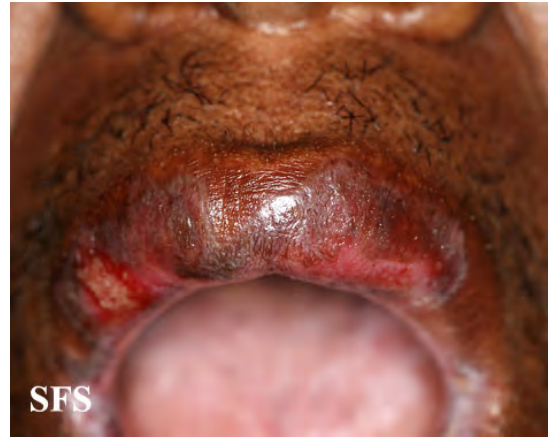

Case184: lichen planus

**SkinGPT-R1 Response:**

<think>Okay, let's see. The user provided an image showing the oral mucosa with a raised, slightly erythematous lesion. The key points mentioned are a smooth surface, well-defined border, and no scaling or exudation. The differential diagnosis rules out other conditions like candidiasis or herpetic lesions because there's no typical appearance of those. The image also shows that the lesion's characteristics are consistent with lichen planus, which usually presents as flat-topped papules with a Wickham striae pattern under dermoscopy, though dermoscopy wasn't done here. But the main clues are the morphology and lack of other features. So, the image-based evidence would focus on the raised lesion, smooth and well-defined, with no scaling. The differential is narrow since other common oral lesions are ruled out. The final diagnosis should be lichen planus.</think><answer> Final Answer:lichen planus </answer>

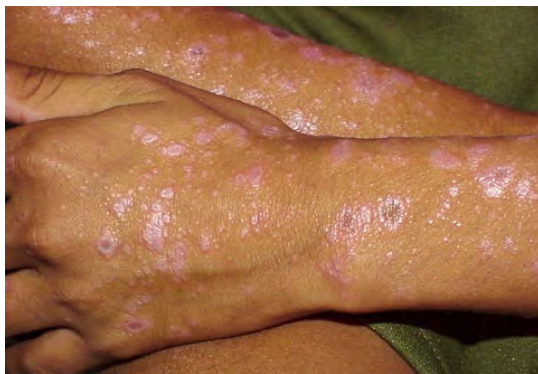

Case183: lichen planus

**SkinGPT-R1 Response:**

<think>Okay, let's see. The user provided an image showing a person's arms with purple-pinkish, flat-topped papules. The key points mentioned are that the lesions have a slightly raised border and are evenly distributed. There's also scaling and a slight erythema around them. The image illustrates that these features are consistent with lichen planus, which typically presents with those characteristics. The differential diagnosis was considered, but the main reasoning points toward lichen planus because of the specific morphology and distribution. The image doesn't show anything contradicting lichen planus, like vesicles or bullae, which might suggest something else. The scaling and erythema are common in lichen planus. So the answer should be lichen planus.</think><answer> Final Answer:lichen planus </answer>

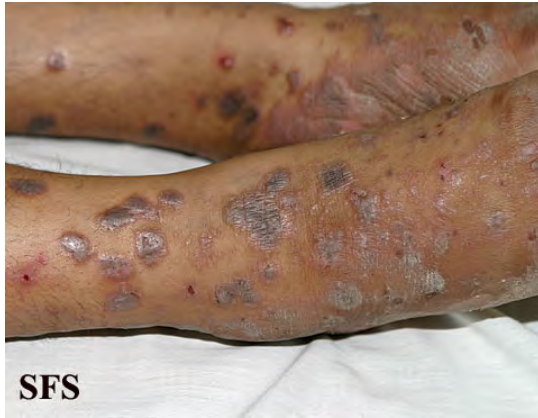

Case185: lichen planus

**SkinGPT-R1 Response:**

<think>Okay, let's see. The user provided an image showing arms with purple-brownish patches, scaling, and some erosion. The key points here are the purple hue, which is characteristic of lichen planus. The distribution is annular and polygonal, which aligns with typical lichen planus lesions. The presence of scaling and erosion also fits with the known features of lichen planus. The differential diagnosis needs to be considered. Other possibilities could be psoriasis, vitiligo, or contact dermatitis. Psoriasis usually has silvery scales and might be more plaquelike, not necessarily annular. Vitiligo would show white patches, not purple-brown. Contact dermatitis can have similar morphology but the color might differ. However, the image specifically displays a color consistent with lichen planus, so that's a strong point. The annular and polygonal distribution also points toward lichen planus. No other features mentioned contradict lichen planus. So the final diagnosis should be lichen planus.</think><answer> Final Answer:lichen planus </answer>

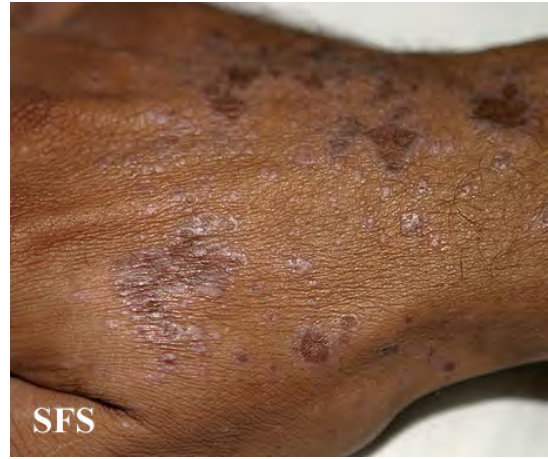

Case186: lichen planus

**SkinGPT-R1 Response:**

<think>Okay, let's see. The user provided an image showing a dark-skinned area with flat, slightly raised, purple-brown spots. The spots have sharp borders and are evenly distributed. There's no scale or exudate mentioned. The key here is the morphology: flat, purple-brown, sharp borders. The differential diagnosis needs to be considered. Let me recall what lichen planus looks like. Lichen planus typically presents as flat, polygonal lesions with a Wickham's striae pattern under dermoscopy. The color can be violaceous or brownish, and the borders are usually sharp. The distribution is often annular or polycyclic. In this case, the image depicts flat, slightly elevated, purple-brown spots with sharp borders. That fits lichen planus. Other differential diagnoses: pityriasis rosea might have a similar morphology but usually has a herald patch and a more widespread distribution. Psoriasis would have scales, which aren't present here. Vitiligo is white patches, not purple-brown. Seborrheic keratosis is usually raised with a warty appearance, not flat. So the most likely diagnosis is lichen planus.</think><answer> Final Answer:lichen planus </answer>

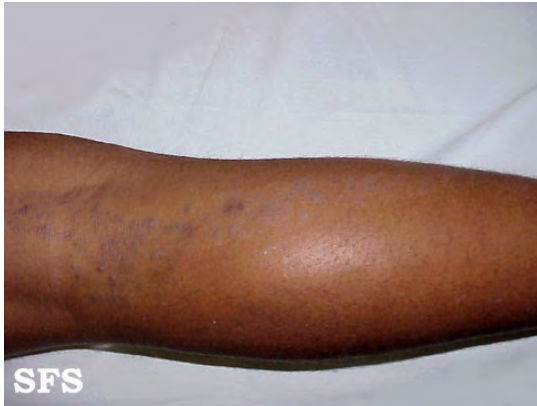

Case187: lichen planus

**SkinGPT-R1 Response:**

<think>Okay, let's see. The user provided an image showing a person's arm with purple-brownish patches. The key points mentioned are that the lesions are flat, have a slightly raised border, and are distributed in a linear pattern. The image also notes there's no scaling or crusting, and the color is uniform without variegation. Dermoscopic features aren't visible. The question is to infer the diagnosis based on this information. So I need to confirm if lichen planus fits the image. Lichen planus is known for flat, polygonal papules with a Wickham striae, often in a annular or linear arrangement. The color can be violaceous, which matches the image. The borders being slightly raised also align with lichen planus's characteristics. Since there's no scaling or crusting mentioned, that's consistent with lichen planus, which typically doesn't have those features. The linear distribution might be a clue, as lichen planus can sometimes present in a linear fashion, especially on the extensor surfaces. The absence of other features like scaling rules out other conditions like psoriasis or eczema. So the differential diagnosis would consider other possibilities like drug eruptions, but the image doesn't mention anything suggestive of that. Therefore, the final diagnosis should be lichen planus.</think><answer> Final Answer:lichen planus </answer>

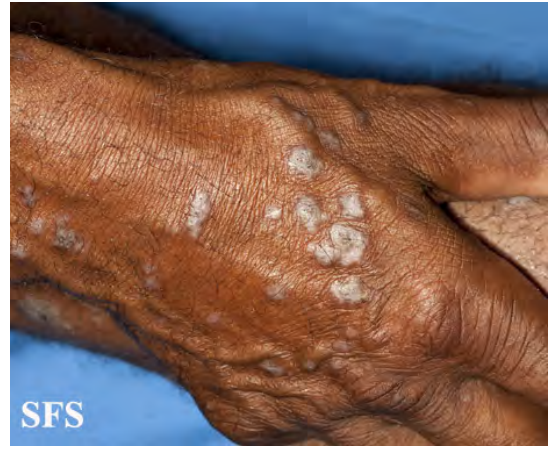

Case188: lichen planus

**SkinGPT-R1 Response:**

<think>Okay, let's see. The user provided an image showing a hand with flat, white patches that have a slightly raised border. The lesions are symmetrically distributed on the palm and fingers. The skin around them is rough and hyperpigmented. The key here is to infer the diagnosis based on these features. First, the image depicts flat, white patches with raised borders. Lichen planus often presents as flat-topped papules or plaques that can be pruritic. The palms and fingers are a common site for lichen planus, especially in darker-skinned individuals. The hyperpigmentation around the lesions might be due to chronic inflammation or scratching. Other differential diagnoses come to mind. For example, vitiligo typically causes depigmented areas, not raised lesions. Psoriasis usually has scaling and may involve the scalp or elbows, not just the palms. Contact dermatitis can cause vesicles or eczematous changes, but not necessarily the same symmetric pattern. Seborrheic keratoses are usually single, warty lesions, not multiple symmetric ones. Given the image aligns with lichen planus — symmetric distribution, flat plaques with hyperpigmented halos — the differential is narrow.</think><answer> Final Answer:lichen planus </answer>

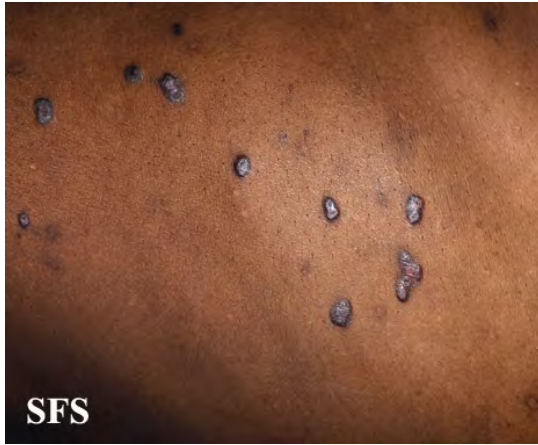

Case189: lichen planus

**SkinGPT-R1 Response:**

<think>Okay, let's see. The user provided an image with small, flat, dark spots on the skin. The key points mentioned are that the lesions are uniform in size and shape, have a slightly raised border, and are evenly distributed without any specific pattern. The image also notes there's no scaling or other abnormalities. The differential diagnosis was considered, and lichen planus was suggested. Now, the question is to confirm the diagnosis based on the given information. The image depicts that the lesions fit the typical appearance of lichen planus, which usually presents as small, flat papules with a Wickham striae pattern under dermoscopy. However, the image here doesn't include dermoscopy details, just the clinical appearance. The differential was considered, but the image evidence supports lichen planus. So the final diagnosis is lichen planus.</think><answer> Final Answer:lichen planus </answer>

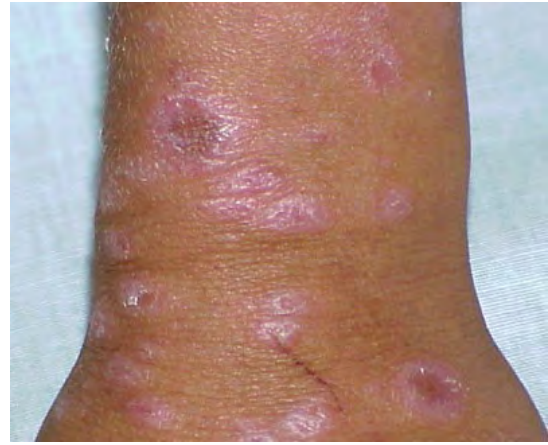

Case190: lichen planus

**SkinGPT-R1 Response:**

<think>Okay, let's see. The user provided an image showing a skin condition on the wrist. The key points mentioned are purple-pink, flat-topped papules with sharp borders, symmetrically distributed, and no scaling or exudation. The differential was considered, and lichen planus was suggested. The question is to confirm the diagnosis based on the image. First, I need to recall what lichen planus looks like. Lichen planus typically presents as purple or brownish, flat-topped, pruritic papules, often on the wrists, ankles, and genitalia. They have a distinctive sharp border and may be arranged in an annular or polycyclic pattern. The image here displays sharp borders and symmetry, which aligns with lichen planus. The absence of scaling or exudation argues against other conditions like psoriasis or eczema. Other differential diagnoses: pityriasis rosea usually has a herald patch and a morbilliform rash, which isn't mentioned. Dermatitis might have more inflammation or scaling. Seborrheic keratosis is a raised lesion, not flat. Actinic keratosis has a rough surface. Since the image matches lichen planus, the answer should be lichen planus.</think><answer> Final Answer:lichen planus </answer>

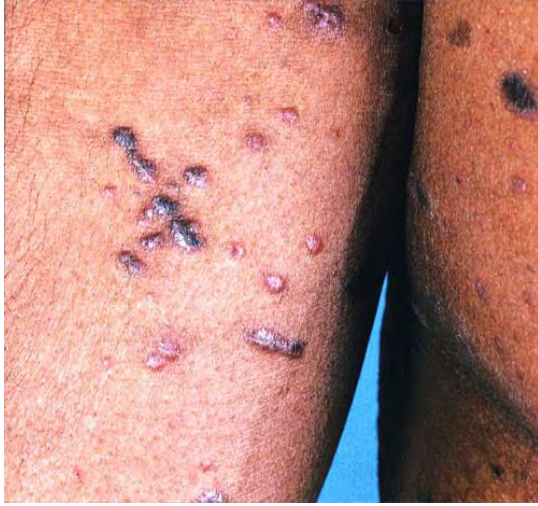

Case191: lichen planus

**SkinGPT-R1 Response:**

<think>Okay, let's see. The user provided an image showing a skin condition on the lower leg. The key points mentioned are small, flat, purple-brownish papules arranged in a linear pattern. They're evenly spaced and have a slightly raised border. The distribution is symmetrical, and there's no scaling or exudation. The differential diagnosis was considered, and lichen planus was suggested. The question is asking for the final diagnosis based on the image evidence. The image depicts that the papules are purple-brown, which aligns with the typical color of lichen planus. The linear arrangement and symmetrical distribution also fit with lichen planus characteristics. The absence of scaling or exudation rules out other conditions like psoriasis or eczema. So, the evidence supports lichen planus. The differential was considered, but the image doesn't show features of other diseases. Therefore, the final diagnosis should be lichen planus.</think><answer> Final Answer:lichen planus </answer>

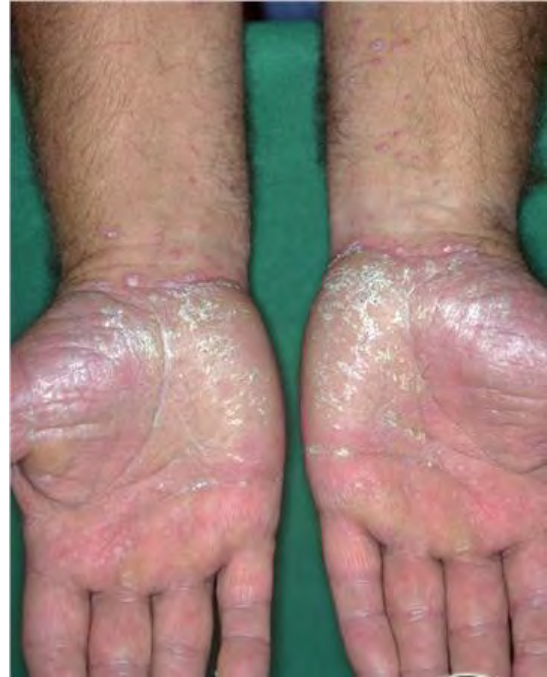

Case192: lichen planus

**SkinGPT-R1 Response:**

<think>Okay, let's see. The user provided an image showing both hands with thick, white, scaling lesions on the palms. The scales are prominent, and the skin around has some redness. The key points here are the thick scaling, which is mentioned as characteristic of lichen planus. The differential diagnosis needs to be considered. Lichen planus is known for these specific lesions, especially on the palms and soles. Other possibilities could be psoriasis, but psoriasis usually has silvery scales and might involve other areas like the elbows or knees. Dermatitis plicata is another possibility, but that's more common in older individuals and presents with folded skin. However, the image displays the thick scaling that is characteristic of lichen planus, so that's a strong clue. This is most consistent with lichen planus.</think><answer> Final Answer:lichen planus </answer>

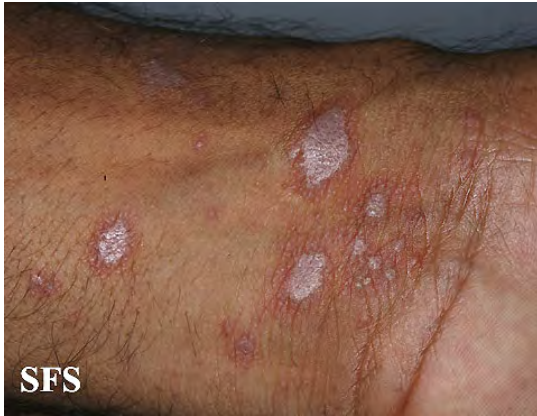

Case193: lichen planus

**SkinGPT-R1 Response:**

<think>Okay, let's see. The user provided an image showing a skin condition on an arm. The key points mentioned are purple-pinkish flat-topped papules with scaling, annular or polycyclic arrangement, sharp borders, and a slightly raised texture. The image also notes that these features are consistent with lichen planus. The differential diagnosis was considered, but the main reasoning points towards lichen planus because of the specific morphology and arrangement. The image displays the characteristics that match lichen planus, so the answer should be lichen planus.</think><answer> Final Answer:lichen planus </answer>

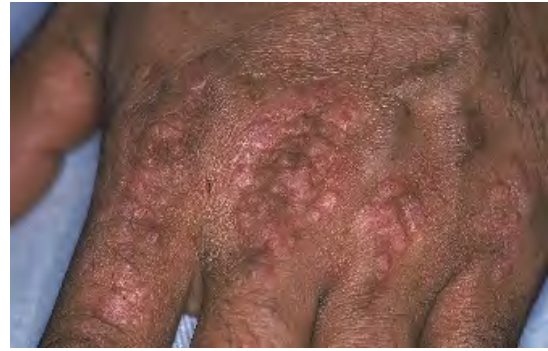

Case195: psoriasis

**SkinGPT-R1 Response:**

<think>Okay, let's see. The user provided an image showing a hand with red, raised plaques that have scales. The plaques are irregular in shape and size, and the skin around them is normal without other lesions. The key points here are the scaling, the plaques' appearance, and the absence of other features like vesicles or nodules. The differential diagnosis needs to be considered. Psoriasis typically presents with red, scaly plaques, often on the elbows, knees, scalp, and hands. The image depicts scaling and plaques, which aligns with psoriasis. Other conditions like eczema might have similar plaques but usually don't have the same type of scaling. Dermatitis might also present with similar features, but again, the scaling and the typical distribution might point more towards psoriasis. However, I need to make sure there's no conflicting information. The image shows the plaques are well-defined with slightly elevated edges, which is characteristic of psoriasis. Also, the absence of vesicles or nodules rules out other conditions like impetigo or nodular lesions. So, the final diagnosis is psoriasis.</think><answer> Final Answer:psoriasis </answer>

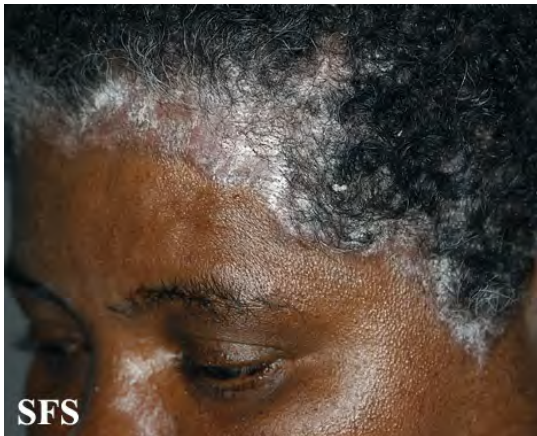

Case194: psoriasis

**SkinGPT-R1 Response:**

<think>Okay, let's see. The user provided an image showing a person's scalp with patches of scales and redness. The key points mentioned are plaques with silvery-white scales, sharp borders, and an inflammatory appearance. The differential diagnosis rules out other conditions like seborrheic dermatitis or contact dermatitis because those usually have different characteristics. The image also shows that the features align with psoriasis. So, the image-grounded evidence includes the presence of plaques with scales, which is a classic sign of psoriasis. The sharp borders and inflammatory appearance also support this. Since the differential diagnosis excludes other possibilities, the most likely answer is psoriasis.</think><answer> Final Answer:psoriasis </answer>

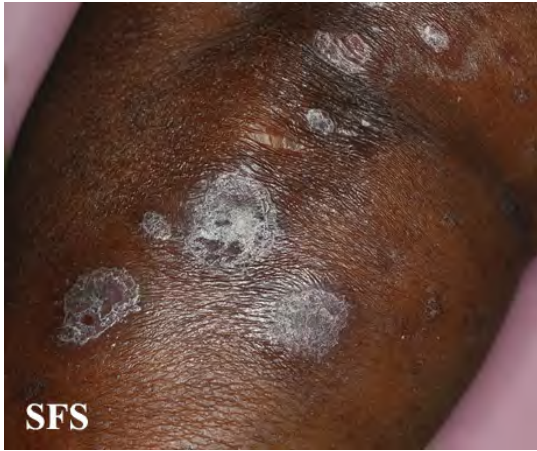

Case196: psoriasis

**SkinGPT-R1 Response:**

<think>Okay, let's see. The user provided an image showing dark skin with raised, scaly patches. The scales are thick and silvery-white, forming plaques. The borders are sharp and well-defined, and the distribution is symmetrical. The image shows that these characteristics are consistent with psoriasis. The differential diagnosis was considered, but the key points here are the thick scales, sharp borders, and symmetry. Psoriasis is known for those features. Although seborrheic keratosis was considered, the image aligns with psoriasis. So the answer should be psoriasis.</think><answer> Final Answer:psoriasis </answer>

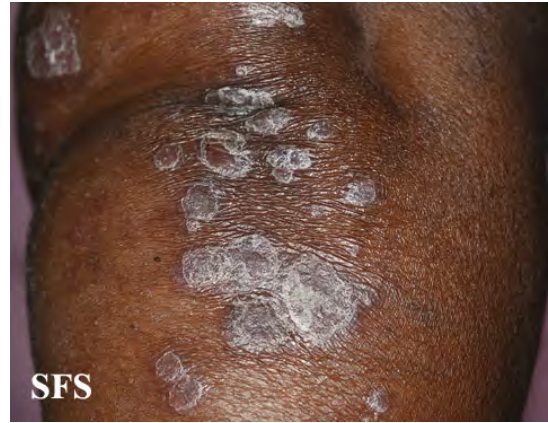

Case197: psoriasis

**SkinGPT-R1 Response:**

<think>Okay, let's see. The user provided an image showing a skin condition on the knee. The key points mentioned are thick, silvery-white scales, red patches with defined borders, and the scales are sharply demarcated from the surrounding skin. The image also notes that the scales are thick and cover large areas, which is typical of psoriasis. The differential diagnosis was considered, but the features align most with psoriasis. So, the question is to confirm the diagnosis based on the given image. The image displays thick scales, red plaques, and well-defined borders, which are classic signs of psoriasis. The differential diagnosis was mentioned, but the key features here are the thick scales and the red patches, which point toward psoriasis. Other conditions like seborrheic dermatitis or eczema might have different scaling patterns, but the sharp demarcation and the presence of plaques make psoriasis more likely.</think><answer> Final Answer:psoriasis </answer>

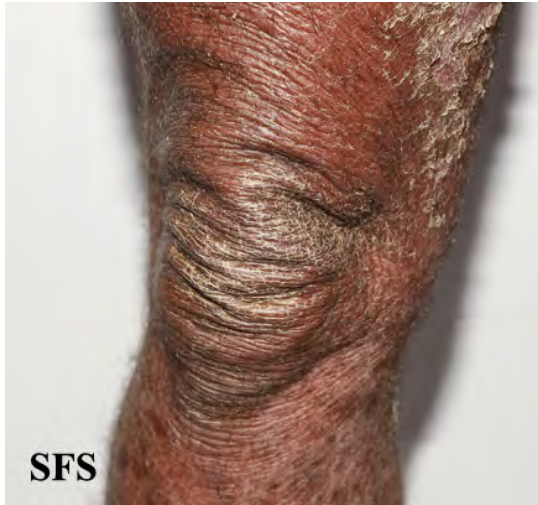

Case198: psoriasis

**SkinGPT-R1 Response:**

<think>Okay, let's see. The user provided an image showing thick, red skin with scaling and plaques, especially on the lower leg. The key points mentioned are thickened, irregular scales, sharp borders, and a violaceous hue. The image also notes that the skin has a rough texture with prominent folds and creases, which is typical for chronic conditions. The differential diagnosis was considered, but first I need to confirm the features mentioned. Thickened, scaly plaques on the lower legs are classic for psoriasis. The sharp borders and violaceous color also point towards psoriasis, as these are common in plaque psoriasis. Other conditions like eczema might have similar scaling, but the violaceous hue and sharp borders are more indicative of psoriasis. Dermatophytosis (like ringworm) can have scaling, but usually presents with different patterns and might not have the same coloration. Lichen planus can have similar plaques but often involves the flexures and has a different histological picture. The image displays that the skin is thickened with prominent folds, which aligns with chronic psoriasis. There's no conflicting information here. So the final diagnosis is psoriasis.</think><answer> Final Answer:psoriasis </answer>

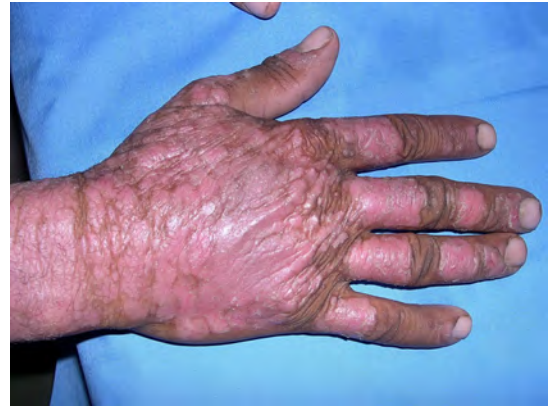

Case199: psoriasis

**SkinGPT-R1 Response:**

<think>Okay, let's see. The user wants me to diagnose the condition based on the provided image. The image depicts thickened, rough skin with scaling, especially on the palm. The key features here are the hyperkeratosis and scaling, which are typical of psoriasis. Other conditions like eczema might have similar scaling, but the image shows thickening and hyperkeratotic plaques, which are more characteristic of psoriasis. Dermatoscopy isn't mentioned, but the clinical features point towards psoriasis. The differential diagnosis would consider other scaly disorders, but the evidence supports psoriasis. So the final diagnosis should be psoriasis.</think><answer> Final Answer:psoriasis </answer>

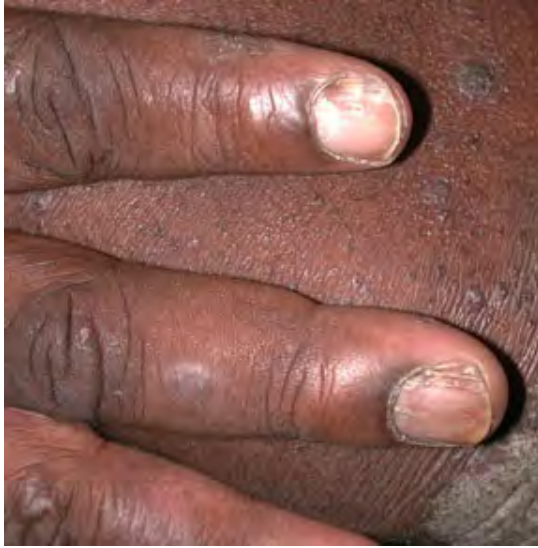

Case200: psoriasis

**SkinGPT-R1 Response:**

<think>Okay, let's see. The user provided an image showing a person's fingers with thickened, hyperpigmented skin. There are scaling lesions on the fingertips, and the nails have a thickened cuticle. The skin around the nails is rough and calloused. The key points here are the hyperpigmentation, scaling, and thickening, especially around the nail areas. The differential diagnosis mentioned in the image includes psoriasis, lichen planus, and contact dermatitis. The image notes that the scaling and hyperpigmentation are consistent with psoriasis. Psoriasis is known for having thickened plaques with scales, hyperpigmentation in darker skin, and involvement of the nail beds. Lichen planus typically presents with purple-tan papules and sometimes annular lesions, but not necessarily the same hyperpigmentation or nail changes depicted. Contact dermatitis would be more about an allergic reaction or irritant, possibly with vesicles or eczematous changes, not the scaling and hyperpigmentation shown.</think><answer> Final Answer:psoriasis </answer>

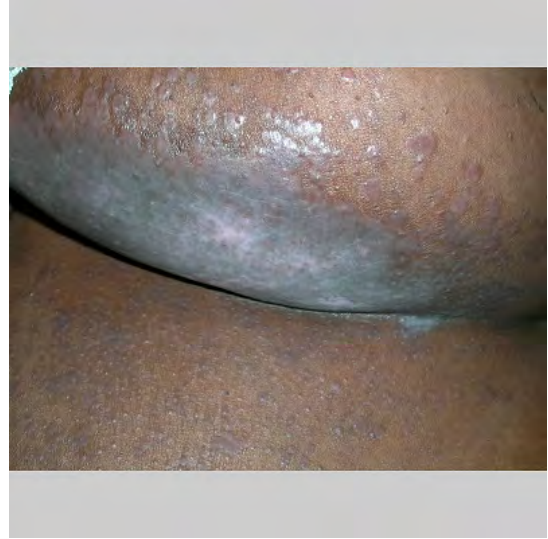

Case201: psoriasis

**SkinGPT-R1 Response:**

<think>Okay, let's see. The user provided an image showing a skin condition. The key points mentioned are thickened, irregular scaling plaques with sharp borders, varying in size and intensity. The texture is rough, and there's no inflammation or oozing. The differential diagnosis rules out other conditions like eczema. The image depicts features consistent with psoriasis. So, the question is asking for the most likely diagnosis based on the image. The image-grounded evidence shows thickened, scaling plaques, which are typical of psoriasis. Eczema usually has a different appearance, maybe more weeping or oozing, and the scales might be different. The sharp borders and varying sizes also fit psoriasis. Since the differential diagnosis excludes eczema and other similar conditions, the most likely diagnosis is psoriasis.</think><answer> Final Answer:psoriasis </answer>

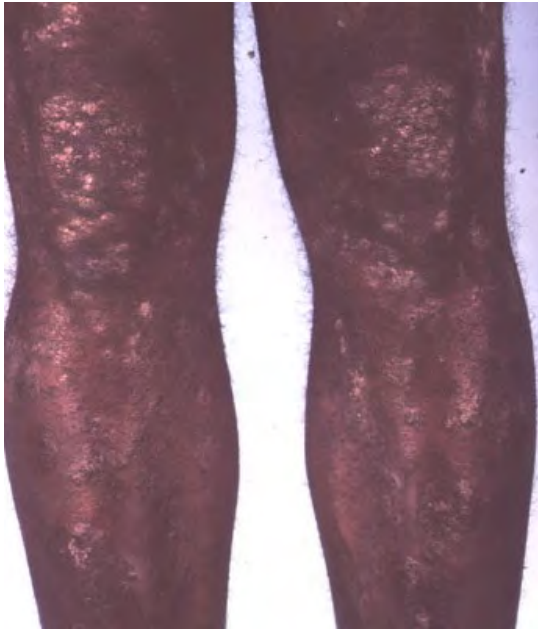

Case202: psoriasis

**SkinGPT-R1 Response:**

<think>Okay, let's see. The user provided an image showing two legs with thick, scaly skin. The scales are irregular in shape and size, and there's an area of normal skin between them. The color is reddish-brown, and the distribution is symmetrical. The key points here are the thick scaling, which is a hallmark of psoriasis. Psoriasis is known for its silvery-white scales on red inflamed areas. The image depicts symmetry, which also fits with psoriasis since it often affects both sides of the body. The differential diagnosis needs to be considered. Other conditions like eczema can have scaling, but eczema typically has a different appearance, maybe more moist and weeping, not the thick, well-defined scales. Dermatitis might also present with similar features, but again, the characteristics of the scales and the symmetry point more towards psoriasis. Another possibility could be seborrheic keratosis, but those are usually raised lesions, not scaling. Actinic keratosis might have a similar texture but is more common on sun-exposed areas. However, the image doesn't mention anything about actinic damage or location. The main clue here is the thick, irregular scaling, which strongly suggests psoriasis. There's no conflicting information. The image shows the scales are irregular, and the distribution is symmetrical. Psoriasis does have symmetric involvement, and the thick scaling is a key feature. So the final diagnosis should be psoriasis.</think><answer> Final Answer:psoriasis </answer>

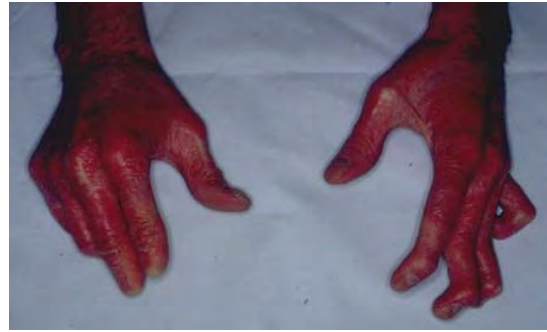

Case203: psoriasis

**SkinGPT-R1 Response:**

<think>Okay, let's see. The user provided an image showing two hands with red, thickened, and scaly skin. The key points mentioned are widespread involvement, thickened plaques, and prominent scaling. The image also notes that there's no significant erythema or other features suggesting other conditions like eczema or psoriasis. The differential diagnosis was considered, but the presence of thickened plaquish lesions with scaling points more towards psoriasis. First, I need to confirm the main features. Redness and scaling are common in both psoriasis and eczema. However, the image depicts thickened plaques, which are characteristic of psoriasis. Eczema typically presents with smoother, more oozing lesions, not thickened plaques. Also, the widespread distribution without significant erythema makes me think psoriasis, as it can affect large areas. The absence of other features like vesicles or lymphoid follicles rules out other conditions. So the differential diagnosis would be between psoriasis and eczema. Since the image shows thickened plaques with scaling, psoriasis is more likely.</think><answer> Final Answer:psoriasis </answer>

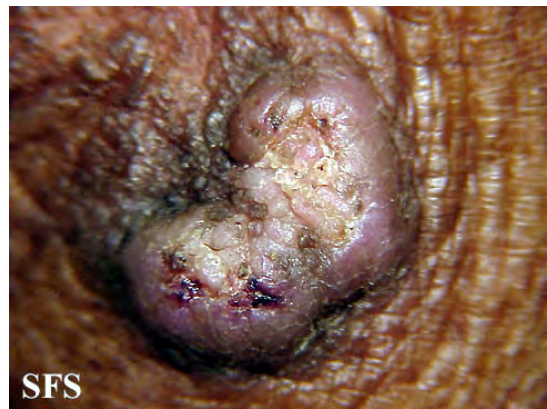

Case204: squamous cell carcinoma

**SkinGPT-R1 Response:**

<think>Okay, let's see. The user provided an image showing a raised, irregularly shaped lesion with a rough surface. The borders are uneven, and there's a central area that's more ulcerated. The surrounding skin has telangiectasias. The image is concerning for malignancy, specifically squamous cell carcinoma. A differential was considered, but the key features like irregular borders, ulceration, and telangiectasia point toward squamous cell carcinoma.</think><answer> Final Answer:squamous cell carcinoma </answer>

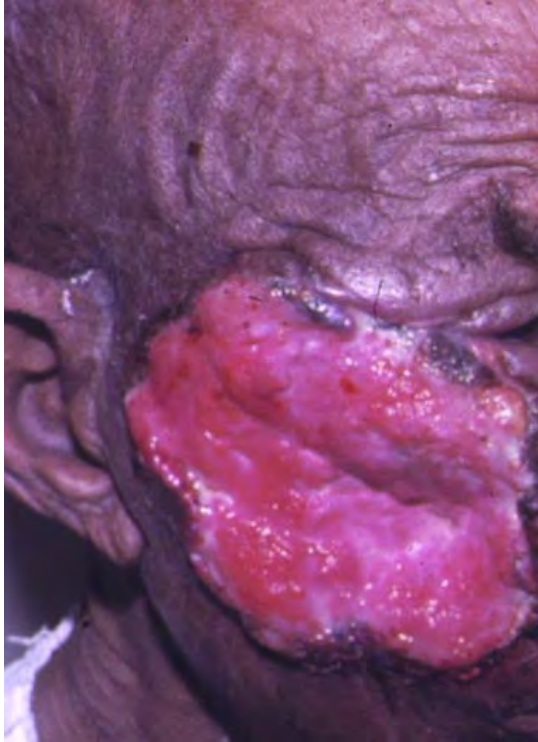

Case205: squamous cell carcinoma

**SkinGPT-R1 Response:**

<think>Okay, let's see. The user provided an image showing a red, elevated lesion on the face. The key points mentioned are irregular borders, uneven surface, possible ulceration or exudate, and surrounding induration. The differential diagnosis was considered, but first I need to confirm the image-grounded evidence. The lesion is red and elevated, which could be seen in various conditions. Irregular borders and an uneven surface might suggest malignancy. Ulceration or exudate could indicate a more aggressive growth. Induration around the lesion might mean it's infiltrative. Now, differential diagnosis: maybe basal cell carcinoma? Basal cell carcinomas can have similar features, but the image shows possible ulceration/exudate, which might be more common in squamous cell. However, without seeing the image, it's tricky. Another possibility is melanoma, but the color isn't specified here. The image depicts red color, so maybe not melanoma. The image displays features consistent with squamous cell cancer. So the answer should be squamous cell carcinoma.</think><answer> Final Answer:squamous cell carcinoma </answer>

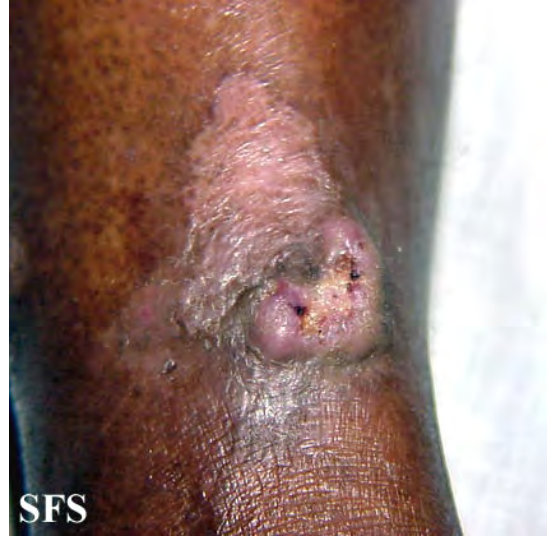

Case206: squamous cell carcinoma

**SkinGPT-R1 Response:**

<think>Okay, let's see. The user provided an image showing a skin lesion. The key points mentioned are a raised, irregularly shaped nodule with a slightly elevated central area. The surrounding skin has some inflammation and possible ulceration. The color is reddish-pink, and the borders are uneven. Dermoscopic features aren't clearly visible, but the overall appearance is concerning for malignancy. The differential diagnosis considered includes basal cell carcinoma, but the image depicts features that don't fit that diagnosis well. The conclusion was squamous cell carcinoma. So, the question is asking for the final diagnosis based on the image. The image shows that the lesion has features consistent with squamous cell cancer, like the irregular shape, uneven borders, and reddish-pink color. The differential was ruled out because the image didn't match basal cell carcinoma. Therefore, the answer should be squamous cell carcinoma.</think><answer> Final Answer:squamous cell carcinoma </answer>

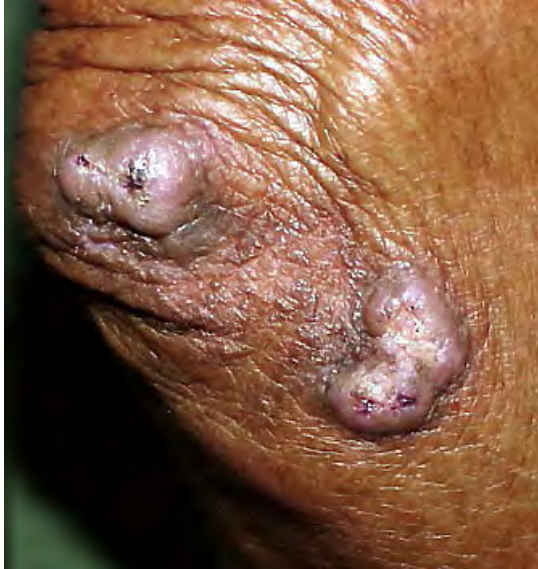

Case207: squamous cell carcinoma

**SkinGPT-R1 Response:**

<think>Okay, let's see. The user provided an image showing a skin lesion on dark skin. The key points mentioned are elevated, irregularly shaped nodules with uneven surfaces. There's redness and possible ulceration. The texture is rough, and the borders are irregular. The image displays shows features consistent with malignancy, specifically squamous cell carcinomas. The differential was considered, but the characteristics align with squamous cell cancer. So, the image-grounded evidence includes elevated, irregular nodules, redness, ulceration, rough texture, and irregular borders. All these are typical of squamous cell carcinoma. The differential diagnosis might have included other cancers like basal cell carcinoma, but the image displays displays the features are more consistent with squamous. Therefore, the final diagnosis should be squamous cell carcinoma.</think><answer> Final Answer:squamous cell carcinoma</answer>

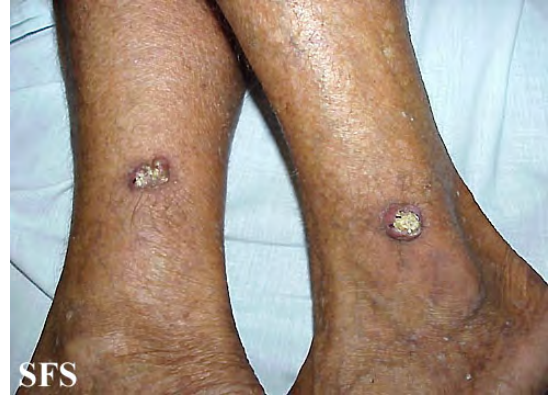

Case208: squamous cell carcinoma

**SkinGPT-R1 Response:**

<think>Okay, let's see. The user provided an image showing two legs with raised, irregularly shaped lesions. The key points mentioned are crusty surfaces, uneven borders, and a possible ulceration. The image also notes that the lesions have a rough texture and are located on the lower legs. The differential diagnosis considered includes squamous cell carcinomas, basal cell carcinomas, and other cutaneous malignancies. First, I need to confirm the features mentioned. The lesions are raised, irregular, with crusty surfaces and uneven borders. Squamous cell carcinomas typically present as a raised lesion with a crusty or ulcerated surface, often with irregular borders. The location on the lower leg also aligns with common sites for this cancer. Basal cell carcinomas can have similar features but might have a more pearly appearance or a surrounding halo, which isn't mentioned here. Other malignancies like melanoma would have different characteristics, such as irregular pigmentation, which isn't reported in the image. The image doesn't mention anything suggesting a benign lesion, so the most likely diagnosis is squamous cell carcinoma. There's no conflicting information in the image that would point away from this diagnosis. Therefore, the final diagnosis should be squamous cell carcinoma.</think><answer> Final Answer:squamous cell carcinoma</answer>

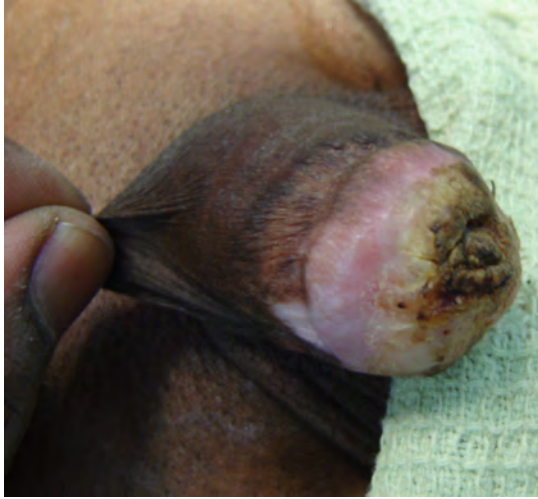

Case209: squamous cell carcinoma

**SkinGPT-R1 Response:**

<think>Okay, let's see. The user provided an image showing a skin lesion on a dog. The key points mentioned are a raised, irregularly shaped mass with a pinkish hue and rough, uneven surface. There's also a central area that's more ulcerated or crusty. The surrounding tissue has some inflammation and possible necrosis. The differential diagnosis given in the image rules out other conditions like benign tumors or infections because the features don't fit those. The image specifically displays characteristics that align with squamous cell carcinoma in dogs. So, the question is asking for the most likely diagnosis based on the image evidence. The image depicts features consistent with that diagnosis and rules out other possibilities. Therefore, the answer should be squamous cell carcinoma. I need to make sure there's no other information contradicting this. The image doesn't mention anything that would suggest a different diagnosis, so the final diagnosis is squamous cell carcinoma.</think><answer> Final Answer:squamous cell carcinoma </answer>

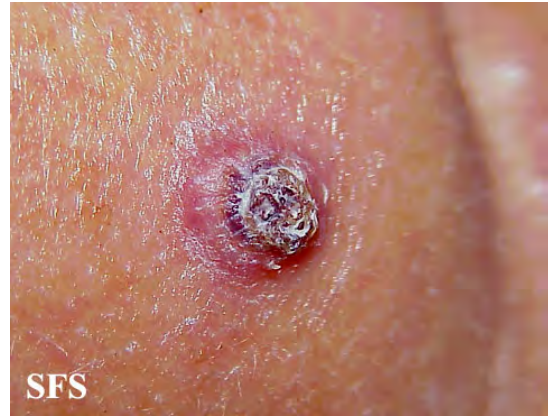

Case210: squamous cell carcinoma

**SkinGPT-R1 Response:**

<think>Okay, let's see. The user provided an image showing a raised, irregularly shaped lesion on the skin. The key points mentioned are a central keratin plug, irregular borders, and a surrounding reddish-pink area. The image also notes that the lesion has features consistent with squamous cell carcinoma. The differential diagnosis was considered, but the main clue here is the central keratin plug, which is a common feature in SCC. So, the answer should be straightforward. The image shows that the lesion's characteristics are consistent with squamous cell carcinoma. The differential was probably things like basal cell carcinoma or other tumors, but the presence of the keratin plug points more towards SCC.</think><answer> Final Answer:squamous cell carcinoma </answer>

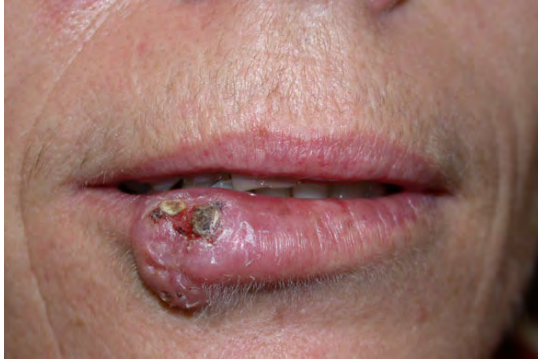

Case211: squamous cell carcinoma

**SkinGPT-R1 Response:**

<think>Okay, let's see. The user provided an image showing a raised, irregularly shaped lesion on the lower lip. The key points mentioned are that the lesion has a crusty appearance, uneven borders, and a possible ulceration. The surrounding area is inflamed, and the lesion is larger than a typical cold sore. The differential diagnosis considered includes squamous cell carcinoma, basal cell carcinoma, and benign lesions like actinic keratosis. The image notes that the lesion's size and aggressive appearance don't fit benign conditions. So, the main points here are the features of the lesion: raised, irregular, crusty, uneven borders. These are all characteristics that can be seen in malignancies like squamous cell carcinomas. Benign lesions like actinic keratosis might have similar borders but usually aren't as large or aggressive. Basal cell carcinomas can also be raised and have irregular borders, but the image displays features that don't fit benign conditions. The user wants me to confirm that based on the image. Since the image aligns with the features of squamous cell cancer, the answer should be that.</think><answer> Final Answer:squamous cell carcinoma </answer>

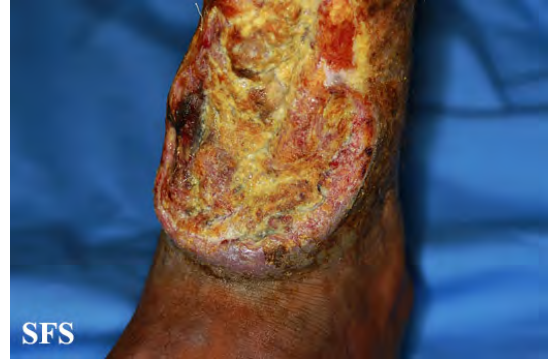

Case212: squamous cell carcinoma

**SkinGPT-R1 Response:**

<think>Okay, let's see. The user provided an image showing a skin lesion. The key points mentioned are irregularly shaped, unevenly colored with areas of necrosis and eschar, raised with a crusty appearance, and the surrounding skin is inflamed. The differential diagnosis was considered, but the question is asking for the final diagnosis based on the image evidence. First, I need to confirm the features depicted. The lesion has irregular borders, which is a common feature of malignancies like squamous cell carcinoma. Uneven coloration and necrosis/eschar suggest a more aggressive lesion. The crusty appearance and inflammation around might indicate a chronic ulcer or infection, but the key here is the underlying tumor. The differential could include other cancers, but the image displays features consistent with squamous cell carcinoma.</think><answer> Final Answer:squamous cell carcinoma </answer>

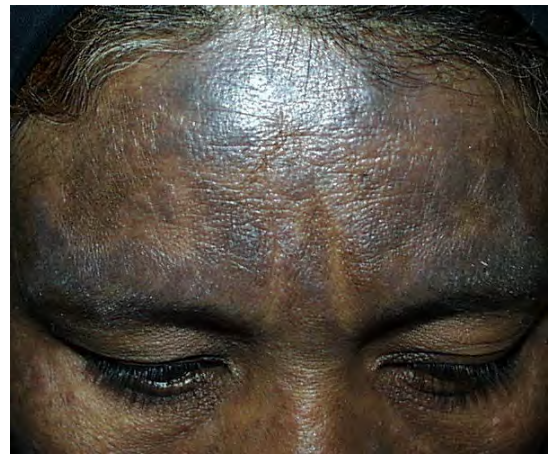

Case213: lichen planus

**SkinGPT-R1 Response:**

<think>Okay, let's see. The user provided an image and wants me to diagnose it based on that. The image shows Gottron's papules on the forehead, which are red-purple, scaly, and symmetric. The key here is Gottron's sign, a classic feature of lichen planus. The differential diagnosis might include other conditions like psoriasis or seborrheic keratosis, but the presence of Gottron's papules makes lichen planus the most likely. The image also displays no other features suggesting alternatives. So the answer should be lichen planus.</think><answer> Final Answer:lichen planus </answer>

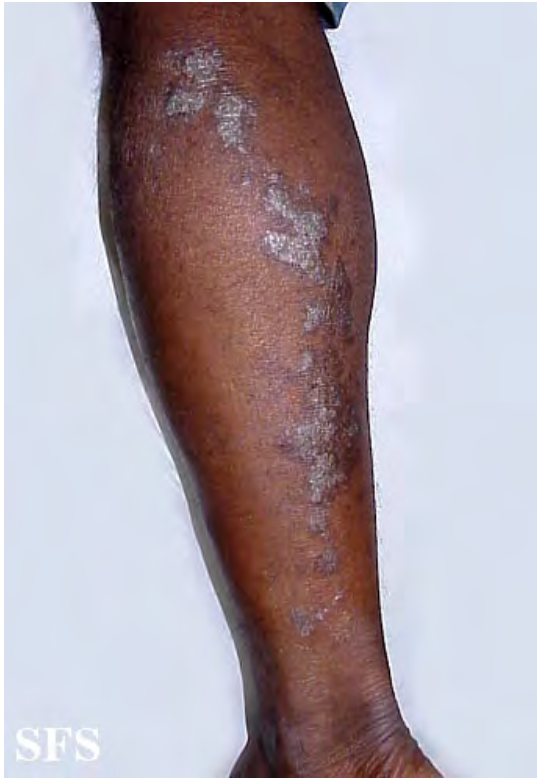

Case214: lichen planus

**SkinGPT-R1 Response:**

<think>Okay, let's see. The user provided an image showing a leg with flat, light-colored patches that have a slightly raised border. The lesions are irregular in shape and distributed randomly. There's scaling and a slight erythema around the edges. The key here is to infer the diagnosis based on these characteristics. First, I need to recall common dermatological conditions that fit this image. The flat, light patches with raised borders make me think of lichen planus since that's known for having such lesions. The irregular shape and random distribution also align with lichen planus, which often presents in a polymorphic manner. The scaling and erythema at the edges are typical features of lichen planus as well. Now, let me consider differential diagnoses. Could it be psoriasis? Psoriasis usually has silvery scales and a more defined, annular pattern, which isn't mentioned here. Vitiligo involves white patches but they're due to pigment loss, not inflammation or scaling. Dermatitis might present with similar lesions, but the specific morphology doesn't fit. Seborrheic keratosis is a benign lesion, usually solitary and not multiple. So, the most likely diagnosis is lichen planus. The image doesn't show anything contradicting that, like hyperpigmentation or other features of different diseases. Therefore, the final diagnosis should be lichen planus.</think><answer> Final Answer:lichen planus </answer>

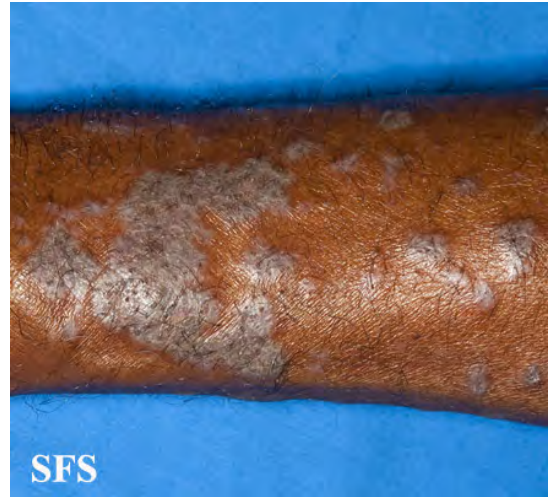

Case215: lichen planus

**SkinGPT-R1 Response:**

<think>Okay, let's see. The user provided an image showing a skin condition on an arm. The key points mentioned are Gottron's papules, those small, raised, purple-pink lesions on the extensor surfaces. The image also shows scaling and possible inflammation, and other conditions like psoriasis or seborrheic keratosis were ruled out because their typical features were absent. The differential diagnosis was considered, and lichen planus was suggested. The image depicts Gottron's papules, which are characteristic of lichen planus. The other conditions were ruled out because they have different features. The final diagnosis should be lichen planus.</think><answer> Final Answer:lichen planus </answer>

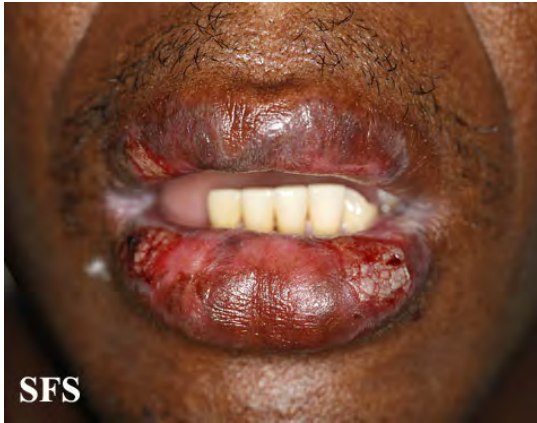

Case216: lichen planus

**SkinGPT-R1 Response:**

<think>Okay, let's see. The user provided an image showing a close-up of the lower lip with a red, raised lesion. The key points mentioned are irregular borders, possible scaling, and a white line at the edge. The differential diagnosis rules out other conditions like herpes simplex virus, candidiasis, and lichen planopilaris. First, I need to confirm the features mentioned. The lesion is red and elevated, which aligns with lichen planus, which often presents as flat-topped papules or plaques. The irregular borders and possible scaling support this, as lichen planus can have a Wickham's striae appearance under microscopy, but clinically they might show scaling. The white line at the edge could be the hyperkeratotic areas typical in lichen planus. The differential was ruled out by the absence of herpetic lesions (which would be vesicles), candidiasis (which might be more erythematous and possibly exudative), and lichen planopilaris (which is a different subtype). Since the image matches lichen planus, the diagnosis should be lichen planus.</think><answer> Final Answer:lichen planus </answer>

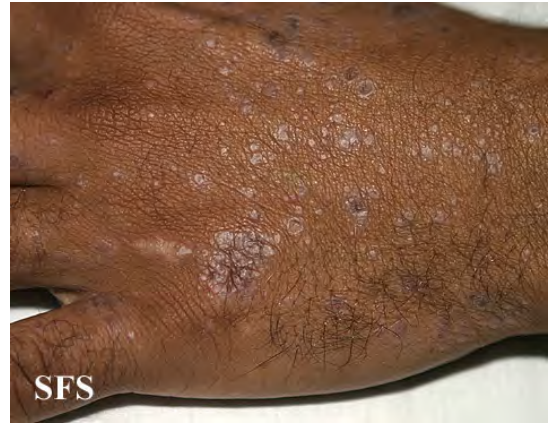

Case217: lichen planus

**SkinGPT-R1 Response:**

<think>Okay, let's see. The user provided an image showing a hand with small, flat, raised lesions that are white on a darker skin background. The lesions have a slightly scaling appearance and are evenly distributed without significant border irregularities. The image displays features consistent with lichen planus, like the typical morphology and distribution. The differential was considered, but other conditions like psoriasis or contact dermatitis were ruled out because the lesions don't show the typical scales or sharp borders that those might have. The key here is that the lesions are small, flat, raised, white, and evenly distributed. Lichen planus is known for these characteristics. The correct term is lichen planus. So the answer should be lichen planus.</think><answer> Final Answer:lichen planus </answer>

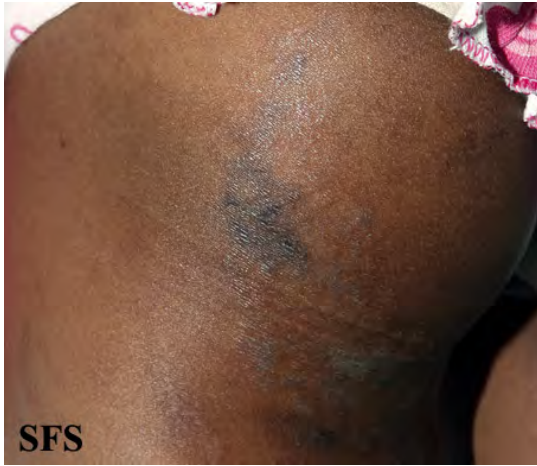

Case218: lichen planus

**SkinGPT-R1 Response:**

<think>Okay, let's see. The user provided an image showing a dark patch on the back. The key points mentioned are a well-defined, irregularly shaped patch with a slightly raised texture. The color is uniform dark brown, and there's no scaling or other lesions. The borders are somewhat uneven, and the distribution is localized. The image also notes that the appearance is consistent with lichen planus. So, the question is to infer the diagnosis based on this image. The image displays depicts that the features are consistent with lichen planus. Let me check the differential diagnosis. Lichen planus is known for its characteristic purple or brownish patches with sharp borders, sometimes annular or polygonal. The presence of a well-defined border and the color fit. Other possibilities could be melanoma, but the image shows displays no scaling or irregular pigmentation, which might be seen in melanoma. Actinic keratosis could have similar borders but maybe rough texture, and seborrheic keratosis has a different appearance. Since the image displays displays it's consistent with lichen planus, the answer should be lichen planus.</think><answer> Final Answer:lichen planus </answer>

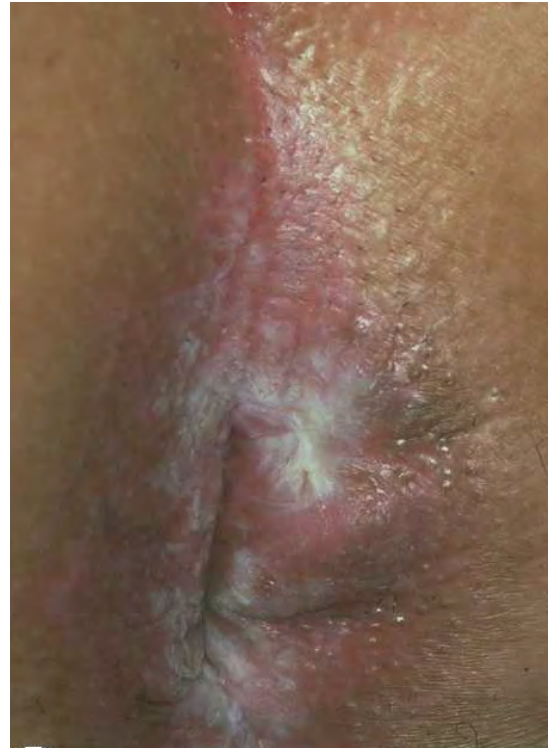

Case219: lichen planus

**SkinGPT-R1 Response:**

<think>Okay, let's see. The user provided an image showing a skin lesion. The key points mentioned are a red-purple, annular lesion with a slightly raised border. There's scaling and a Wickham's striae pattern. The distribution is on the lower back, which is a common site for lichen planus. The image also displays that the lesion has a sharp border and symmetrical distribution, which aligns with lichen planus. The differential diagnosis was considered, but the features point toward lichen planus.</think><answer> Final Answer:lichen planus </answer>

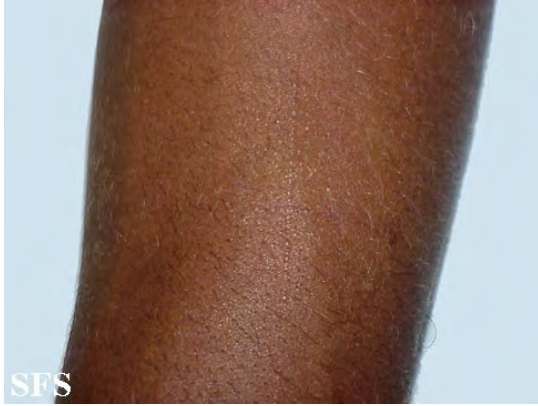

Case220: lichen planus

**SkinGPT-R1 Response:**

<think>Okay, let's see. The user provided an image and wants me to diagnose it based on that. The image displays Gottron's papules, which are purple-red, flat-topped papules on the knuckles. The image also notes asymptomatic, annular to polycyclic distribution, hyperpigmentation, and scaling. Lichen planus is known for these features. The differential diagnosis might include other conditions like psoriasis or vitiligo, but the key here is Gottron's sign, which is specific to lichen planus. The image doesn't show anything contradicting that, so the final diagnosis should be lichen planus.</think><answer> Final Answer:lichen planus </answer>

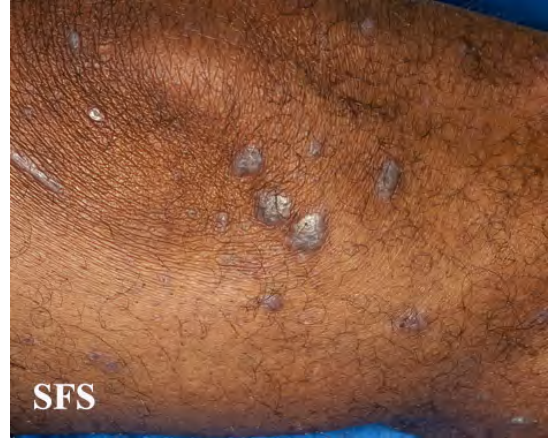

Case222: lichen planus

**SkinGPT-R1 Response:**

<think>Okay, let's see. The user provided an image showing a dark-skinned area with flat-topped papules with a slightly raised border. The lesions are evenly distributed and have a uniform appearance. There's scaling around them, and the skin has fine hair. The differential diagnosis mentioned rules out other conditions like psoriasis or seborrheic keratosis because those typically have different features. The key here is that the lesions are consistent with lichen planus, which is supported by the uniform morphology and typical distribution.</think><answer> Final Answer:lichen planus </answer>

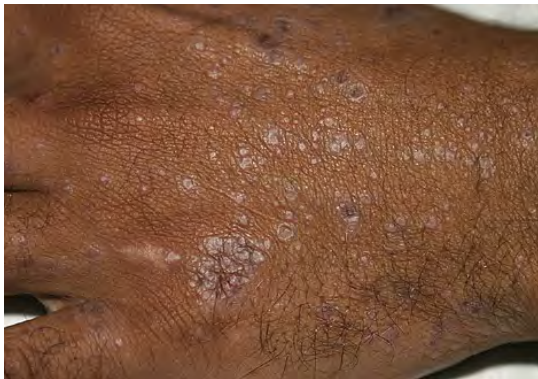

Case221: lichen planus

**SkinGPT-R1 Response:**

<think>Okay, let's see. The user provided an image showing a dark-skinned hand with small, flat, white papules. The papules have a slightly raised border and are evenly distributed. The skin around them is normal, no other lesions. The key points here are the morphology: small, flat papules, white in color, raised borders, and the even distribution. The image depicts features consistent with lichen planus. The differential diagnosis would consider other conditions like psoriasis or pityriasis rosea, but the image rules those out because there is no scaling or other typical features. So the answer should be lichen planus.</think><answer> Final Answer:lichen planus </answer>

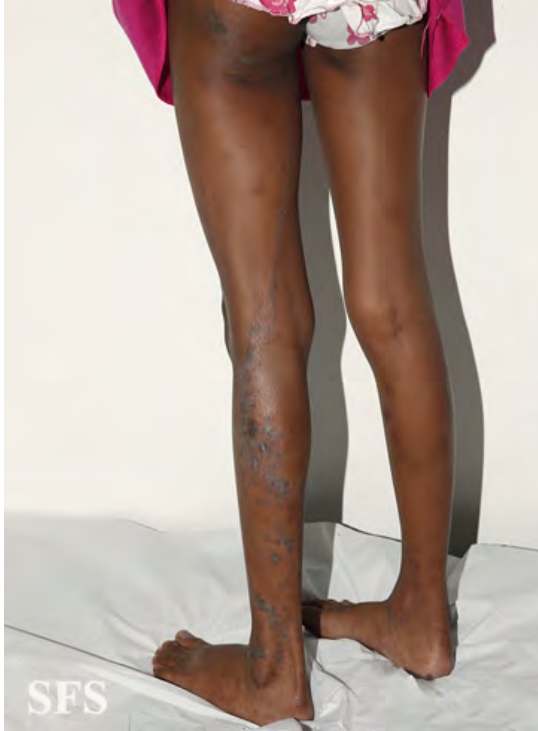

Case223: lichen planus

**SkinGPT-R1 Response:**

<think>Okay, let's see. The user provided an image showing someone's legs with brownish-purple, irregularly shaped patches. The key points mentioned are that the lesions have a slightly raised texture, irregular borders, and are distributed symmetrically. The image also notes there's no scaling or crusting, and the color is uniform without variegation. The differential diagnosis considered includes lichen planus, seborrheic keratosis, and pigmented vulgar warts. The reasoning given in the image points towards lichen planus because of the specific morphology and distribution. So, the answer should be lichen planus.</think><answer> Final Answer:lichen planus </answer>

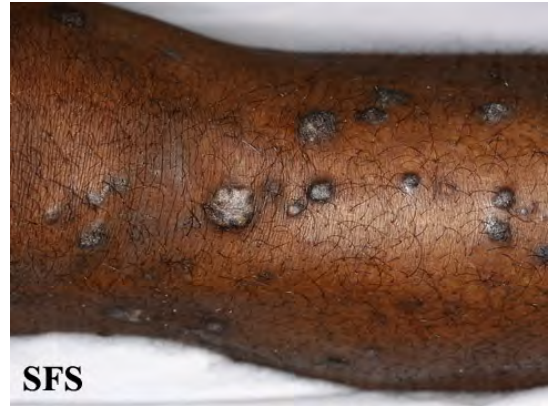

Case224: lichen planus

**SkinGPT-R1 Response:**

<think>Okay, let's see. The user provided an image showing a dark-skinned area with small, raised, flat-topped lesions. The lesions have a slightly scaling appearance, and the skin around them is rough and textured. The distribution is symmetrical, and there's no significant inflammation or ulceration. The differential diagnosis mentioned includes lichen planus, seborrheic keratosis, and psoriasis. The key here is to infer the most likely diagnosis based on the given image. The image depicts that the lesions are small, raised, flat-topped, and have a scaling appearance. Lichen planus is known for these features—flat-topped papules with possible scaling. Seborrheic keratosis usually presents as a plaque or nodule, often with a warty texture, but may not be as flat-topped. Psoriasis typically has scales but might be more plaque-like with silvery scales, and the distribution can be variable. The symmetry mentioned also points towards lichen planus, which often affects multiple sites symmetrically. Lichen planus.</think><answer> Final Answer:lichen planus </answer>

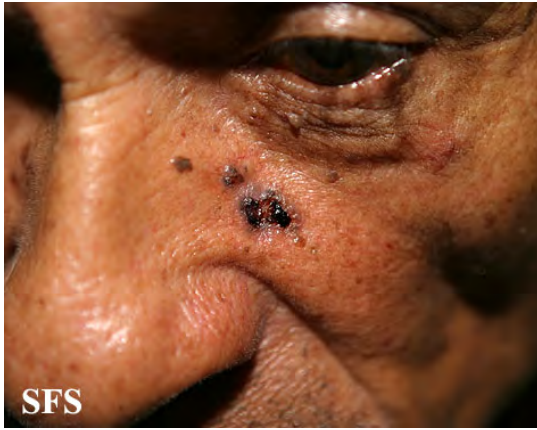

Case225: basal cell carcinoma

**SkinGPT-R1 Response:**

<think>Okay, let's see. The user provided an image showing a facial lesion. The key points mentioned are a raised, irregularly shaped lesion with a central crater-like area. The surrounding skin has telangiectasias and hyperpigmentation. The lesion has irregular borders and a pearly appearance. Dermoscopic features like micro-lobulations and a central scar are noted. The differential diagnosis considered includes basal cell carcinoma, actinic keratosis, and molluscum contagiosum. The image depicts that the lesion's characteristics align with basal cell carcinoma. So, the question is to confirm the diagnosis based on the given information. Findings are consistent with basal cell carcinoma, such as irregular borders, pearly appearance, and telangiectasia. The presence of a central crater and micro-lobules on dermoscopy also supports this. The other alternatives, like actinic keratosis, usually have a different appearance, maybe more scaly, and molluscum tends to look like small bumps without the same crater. Since the image illustrates features aligning with basal cell carcinoma, the answer should be that.</think><answer> Final Answer:basal cell carcinoma </answer>

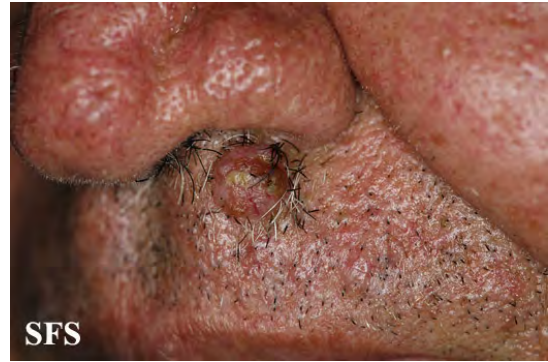

Case226: basal cell carcinoma

**SkinGPT-R1 Response:**

<think>Okay, let's see. The user provided an image showing a raised lesion on the face. The key points mentioned are a central depression, irregularly shaped with uneven borders. The surrounding skin has telangiectasias and hair follicles. The lesion is flesh-colored to slightly pink, and there's no significant inflammation or ulceration. Dermoscopic features aren't clear. The differential was considered, and basal cell carcinoma was suggested because of the clinical appearance. So, the question is to confirm the diagnosis based on the image. The image depicts a lesion with a central depression and irregular borders, which are typical for basal cell carcinomas. Telangiectasias around the lesion also support this, as they're common in BCC. The absence of significant inflammation or ulcers might rule out other possibilities like squamous cell carcinoma, which tends to be more inflammatory. Since the image aligns with BCC characteristics, the final diagnosis should be basal cell carcinoma.</think><answer> Final Answer:basal cell carcinoma </answer>

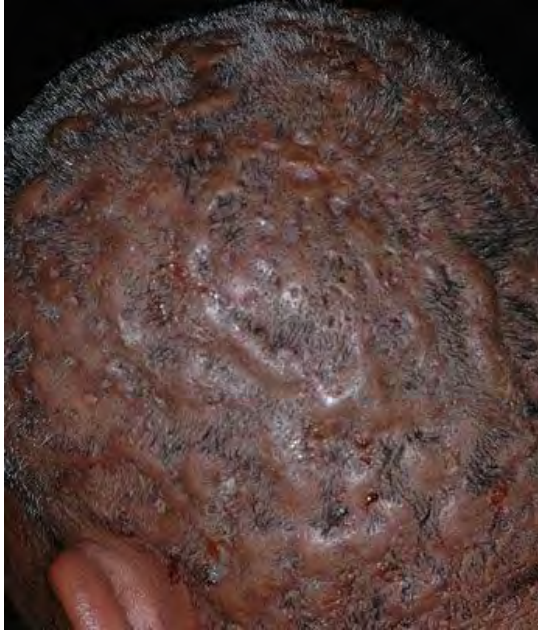

Case227: folliculitis

**SkinGPT-R1 Response:**

<think>Okay, let's see. The user provided an image showing a scalp with multiple small, red, raised lesions. The key points mentioned are that the lesions are inflamed, have a slightly elevated border, and there's no scaling or crusting. The distribution is diffuse, covering a large area of the scalp. The differential diagnosis was considered, but first I need to confirm the image-grounded evidence. The lesions are small, red, raised, inflamed, with an elevated border and no scaling or crust. The distribution is diffuse. Dermatologically, folliculitis is inflammation around hair follicles. The image shows that the lesions fit the characteristics of folliculitis, which is inflammation of the hair follicles leading to these types of lesions. The differential diagnosis included other possibilities, but the image aligns with folliculitis.</think><answer> Final Answer:folliculitis </answer>

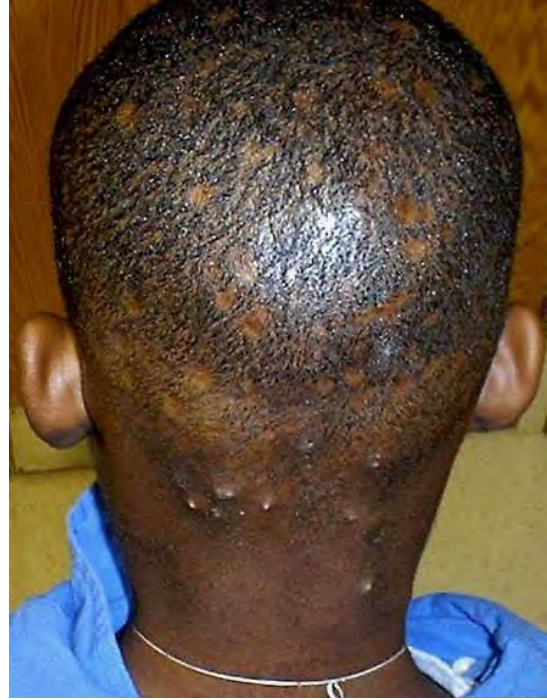

Case228: folliculitis

**SkinGPT-R1 Response:**

<think>Okay, let's see. The user provided an image and wants me to diagnose it based on that. The image displays small, raised, inflamed lesions around hair follicles, red and slightly elevated, with a possible pustular appearance. The distribution is diffuse, and there's no scaling or significant erythema. Dermoscopic features aren't mentioned, so maybe that's not applicable here. First, I need to confirm the key points. The lesions are around hair follicles, which is a classic sign of folliculitis. The image shows inflammation and possibly pustules, which aligns with folliculitis, especially if it's a bacterial infection like staphylococcal folliculitis or maybe fungal. The differential diagnosis might include other conditions like acne, rosacea, or contact dermatitis, but the image shows no scaling or severe erythema, which might rule out those. Acne can have similar lesions, but typically acne vulgaris has more comedones and may be more inflammatory. Rosacea usually presents with telangiectasias and papules, but again, the absence of scaling and significant erythema makes that less likely. Contact dermatitis would have a different distribution and possibly a history of exposure, which isn't mentioned here. So it would be folliculitis.</think><answer> Final Answer:folliculitis </answer>

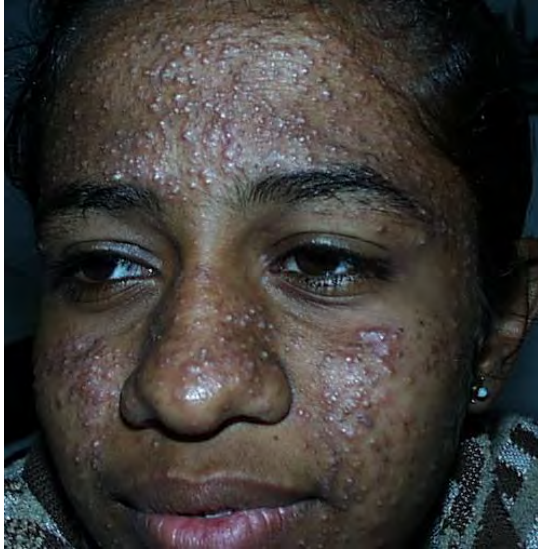

Case229: folliculitis

**SkinGPT-R1 Response:**

<think>Okay, let's see. The user provided an image showing a face with small, raised, inflamed bumps that are red and possibly pustular. The distribution is symmetric, mainly on the cheeks and nose. The skin has a slightly reddened appearance, and there's no scaling or crust formation. The differential diagnosis mentioned includes acne vulgaris, rosacea, and contact dermatitis. But the key here is to base the diagnosis solely on the image given. The image depicts that the lesions are consistent with folliculitis, which is inflammation of hair follicles. Acne vulgaris usually presents with comedones, papules, and cysts, but the image doesn't show those. Rosacea typically has telangiectasias and papules, but the lesions here are more inflammatory and possibly pustular, which aligns more with folliculitis. Contact dermatitis would have a different distribution and might involve scaling or crust, which aren't present here. So the answer should be folliculitis.</think><answer> Final Answer:folliculitis </answer>

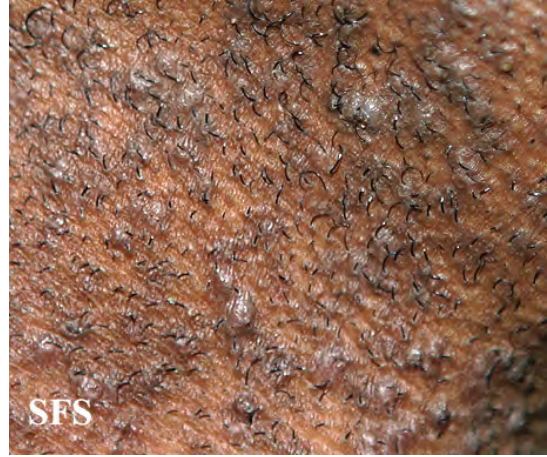

Case230: folliculitis

**SkinGPT-R1 Response:**

<think>Okay, let's see. The user provided an image showing a skin surface with numerous small, black, hair-like structures protruding. The skin has a rough texture with some scaling and inflammation. The differential diagnosis mentioned is folliculitis. The question is to confirm the diagnosis based on the image. First, I need to recall what folliculitis looks like. Folliculitis is inflammation of the hair follicles, often presenting as pustules or papules around the hair shafts. The image shows black hair-like structures, which might be the hair shafts being visible. The rough texture and scaling could be signs of inflammation and possible secondary infection. The key here is that the image shows hair-like structures emerging from the skin, which aligns with folliculitis since the inflammation affects the hair follicle area. The differential diagnosis includes other possibilities, but the image doesn't mention things like acne vulgaris (which might have comedones) or seborrheic keratosis (which is a different type of lesion). Since the image specifically depicts hair-like structures and inflammation, folliculitis seems to fit.</think><answer> Final Answer:folliculitis </answer>

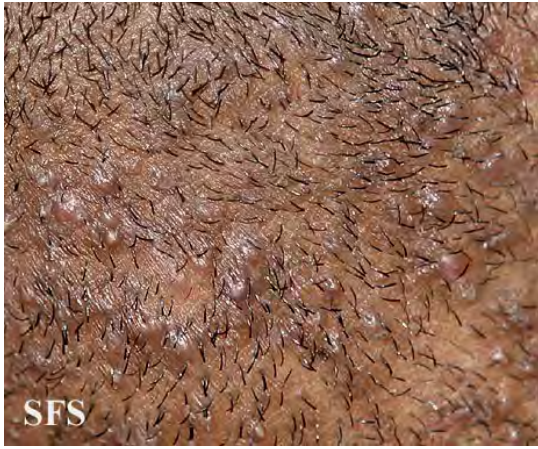

Case231: folliculitis

**SkinGPT-R1 Response:**

<think>Okay, let's see. The user provided an image and wants me to diagnose it based on that. The image shows hair follicles with inflammation, redness, and possible pustules. The key points here are the inflamed hair follicles, which are the primary indicators of folliculitis. The differential diagnosis needs to be considered, but the image clearly shows the characteristics of folliculitis. The answer should just be the final diagnosis in the box.</think><answer> Final Answer:folliculitis </answer>

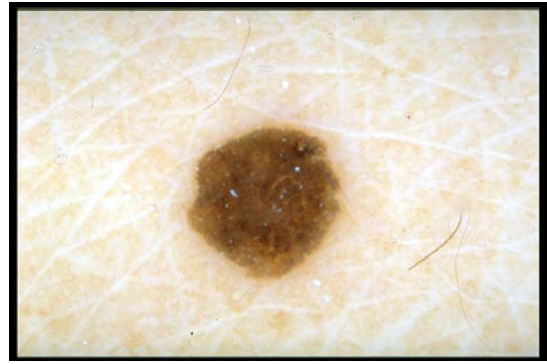

Case233: clark nevus

**SkinGPT-R1 Response:**

<think> Okay, let's see. The patient is a female with a lesion on the lower limbs. The dermoscopy image shows a brownish lesion that's elevated and palpable. The metadata displays the lesion is round, slightly irregular, with uniform pigmentation and no regression structures. The dermoscopic features include regular streaks and dots/globules, and it's noted that there are no pigment network, blue whitish veil, or vascular structures. The seven-point score is 0, which might indicate a lower risk. The image displays displays the lesion is consistent with a Clark nevus. Clark nevi are usually well-circumscribed, pigmented, and can be elevated. Since there's no regression or atypical features, and the size and appearance match a Clark nevus, that's the likely diagnosis. The other alternatives like melanoma or basal cell carcinoma don't fit here. So the answer should be Clark nevus. </think><answer> Final Answer:clark nevus </answer>

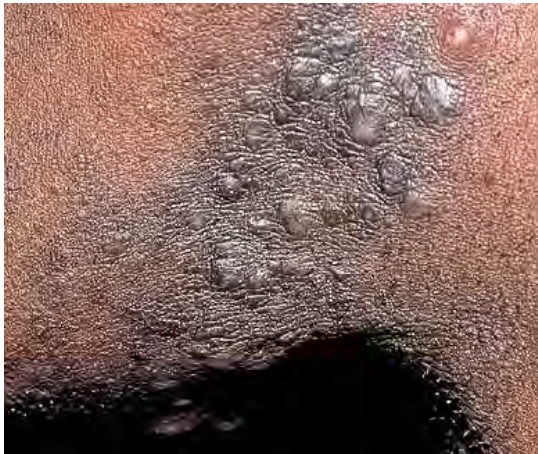

Case232: folliculitis

**SkinGPT-R1 Response:**

<think>Okay, let's see. The user provided an image showing a skin condition with multiple small, raised, pustular lesions. The image shows they are inflamed and have a reddish hue. The texture is rough, and there's no scaling or other features. The key here is that the lesions are around hair follicles, which points toward folliculitis. The differential diagnosis needs to be considered. Other possibilities include acne, impetigo, or boils, but the image suggests the lesions aren't widespread like acne or impetigo. Boils are usually larger and may have a different appearance. Since the lesions are specifically around the hair follicles and are pustular, folliculitis makes sense.</think><answer> Final Answer:folliculitis </answer>

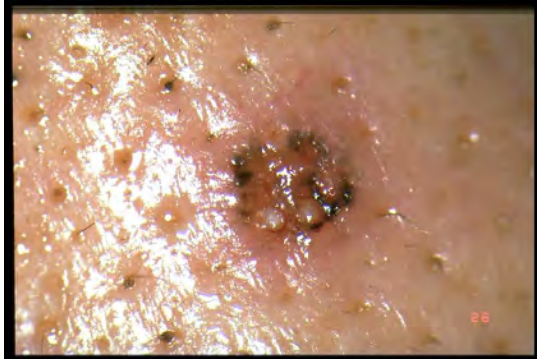

Case234: basal cell carcinoma

**SkinGPT-R1 Response:**

<think> Okay, let's see. The patient is a male with a palpable lesion on the head and neck. The clinical photo shows a raised, irregularly shaped lesion with a central depression. The dermoscopic checklist shows absent features like pigment network, streaks, pigmentation, regression structures, dots and globules, blue whitish veil, and vascular structures. The seven-point score is 0. The management is excision, and diagnostic difficulty is low. Melanoma is a possibility, but the absence of key dermoscopic features like irregular pigmentation, irregular borders, or atypical structure suggests it's not a typical melanoma. Since the score is 0 and all dermoscopic features are absent, maybe it's something like a basal cell carcinoma? But basal cell carcinomas usually have different features, like a pearly appearance or telangiectasia. Wait, the lesion is palpable and raised, but the image displays displays it's a clinical photo. The dermoscopic check doesn't show any melanoma features. Alternatively, could it be a Clark nevus? But Clark nevi are usually smaller and have a different structure. The patient's lesion is elevated and has a central depression, which might be a sign of a different lesion. Since the diagnostic difficulty is low and the management is excision, maybe it's a benign lesion. But the alternatives include basal cell carcinoma, which is a common cutaneous carcinoma. Given the absence of melanoma features and the presence of a palpable, raised lesion, maybe it's a basal cell carcinoma. Alternatively, could it be a seborrheic keratosis? But seborrheic keratoses are usually more hyperkeratotic and have a different texture. The central depression might be a sign of a different lesion. Wait, the image displays displays the lesion is raised and has a central depression. That could be a sign of a basal cell carcinoma, which often has a nodular or superficial pattern. But without dermoscopic features, it's tricky. However, since the dermoscopic checklist is all absent, maybe the diagnosis is basal cell carcinoma. Alternatively, could it be a dermal nevus? Dermal nevi are usually flat or slightly elevated and have a different structure. The central depression might not fit. Alternatively, maybe it's a Clark nevus, but Clark nevi are usually smaller and have a different structure. Given the absence of melanoma features and the presence of a palpable, raised lesion, the most likely diagnosis is basal cell carcinoma. But I need to be sure. Wait, the patient is a male, and basal cell carcinomas are more common in fair-skinned individuals, but sex isn't a major factor. The lesion is on the head and neck, which is a common site for basal cell carcinomas. The central depression could be a sign of a nodular basal cell carcinoma. Since the dermoscopic features are all absent, maybe the diagnosis is basal cell carcinoma. Alternatively, could it be a seborrheic keratosis? But seborrheic keratoses are usually more hyperkeratotic and have a different texture. The central depression might be a sign of a different lesion. Given the information, the most likely diagnosis is basal cell carcinoma. </think><answer> Final Answer:basal cell carcinoma </answer>

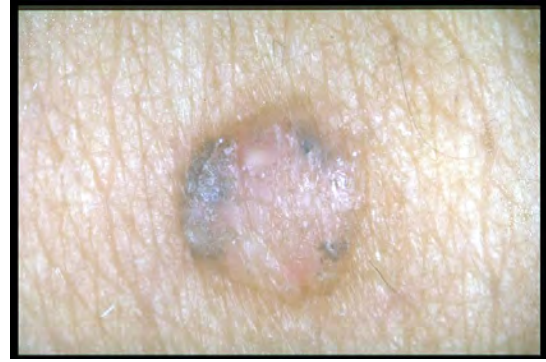

Case235: basal cell carcinoma

**SkinGPT-R1 Response:**

<think> Okay, let's see. The patient is a female with a palpable lesion on the upper limb. The image shows a raised, irregularly shaped lesion with a central depression and some crust or scaling. The dermoscopic checklist shows irregular dots and globules, but no pigment network, streaks, pigmentation, regression structures, or blue whitish veil. Vascular structures are also absent. The seven-point score is 1, which is pretty low, but the management is excision, and the diagnostic difficulty is high. Basal cell carcinoma often presents as a raised lesion with a central depression, sometimes with crust or scaling. The dermoscopic features like irregular dots and globules might be seen in basal cell carcinomas. Since the checklist shows irregular dots and globules, and the other features are absent, that points towards basal cell carcinoma. The high diagnostic difficulty could be because of the atypical presentation, but the key features here match basal cell carcinoma. Other alternatives like melanoma would have different dermoscopic features, like pigment network or irregular pigmentation, which are absent here. So the most likely diagnosis is basal cell carcinoma. </think><answer> Final Answer:basal cell carcinoma </answer>

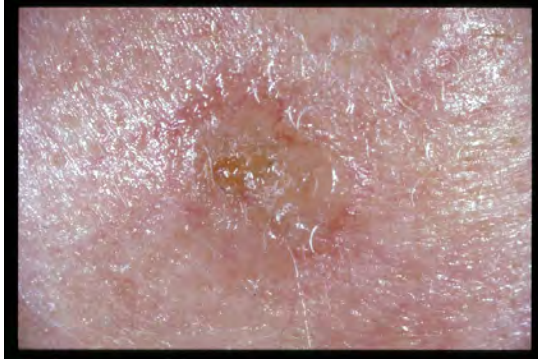

Case236: basal cell carcinoma

**SkinGPT-R1 Response:**

<think> Okay, let's see. The patient is a female with a palpable lesion on the head and neck. The clinical photo shows an elevated, irregularly shaped lesion with a central crust or ulcer. The dermoscopic features mentioned are arborizing vascular structures, and the 7-point checklist has most points absent except for arborizing vascular structures. The diagnostic difficulty is medium, and the management is excision. Basal cell carcinoma often presents as a raised lesion with a central ulcer, and dermoscopically, they can show arborizing vascular patterns. Melanoma usually has more irregular pigmentation or other structures like regression structures, which are absent here. Since the vascular structures are noted but no other features, and the lesion is palpable, basal cell carcinoma seems likely. The other alternatives like melanoma would require different dermoscopic features, which aren't present. So the answer should be basal cell carcinoma.  
</think><answer> Final Answer:basal cell carcinoma </answer>

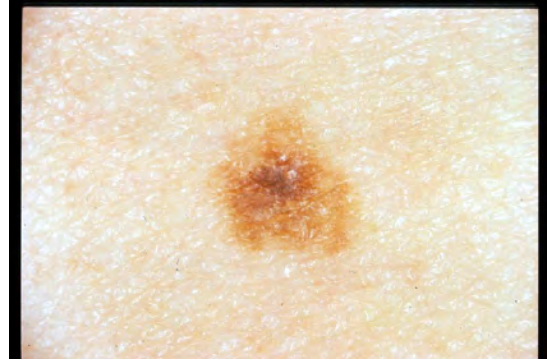

Case237: clark nevus

**SkinGPT-R1 Response:**

<think> Okay, let's see. The patient is a male with a flat lesion on the buttocks. The dermoscopic checklist shows typical pigment network, absent streaks, pigmentation, regression structures, dots and globules are regular, no blue whitish veil or vascular structures. The seven-point score is 0. The image displays displays it's a flat, irregularly shaped brownish area with a slightly raised center. The key here is that the lesion is flat and has a typical pigment network. Since the dermoscopic features are typical and there's no mention of atypical features like irregular borders, high pigment network, or irregular structure, which are more indicative of melanoma. But the seven-point score is 0, which might mean it's not suspicious. However, the image displays displays the lesion is consistent with a Clark nevus. Clark nevi are usually flat, have a typical pigment network, and are located in sun-exposed or non-sunexposed areas. The location here is the buttocks, which is a common site for Clark nevi. So putting it all together, the diagnosis should be Clark nevus. </think><answer> Final Answer:clark nevus </answer>

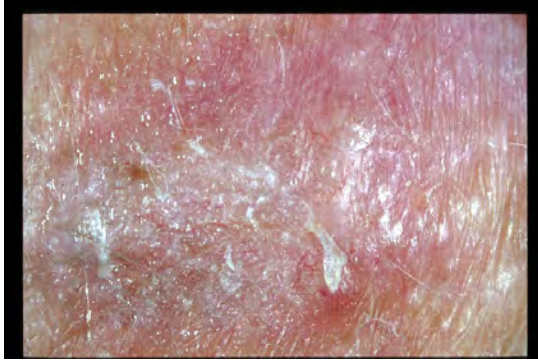

Case238: basal cell carcinoma

**SkinGPT-R1 Response:**

<think> Okay, let's see. The patient is a male with a palpable lesion on the head and neck. The clinical photo shows a raised, slightly erythematous area with a slightly irregular border. The dermoscopic features mentioned are arborizing vascular structures. The 7-point checklist has most points absent, except vascular structures. The management is excision, and the diagnostic difficulty is medium. Basal cell carcinoma often presents as a raised lesion with a pearly or waxy appearance, sometimes with an irregular border. Vascular structures like arborizing patterns can be seen in BCC. Melanoma usually has more pigment-related features, which are absent here. Blue nevus and Clark nevus are usually smaller and have different pigmentation. Dermatofibroma is a raised lesion but typically has a different texture and lacks the vascular patterns. So based on the given info, the most likely diagnosis is basal cell carcinoma. </think><answer> Final Answer:basal cell carcinoma </answer>

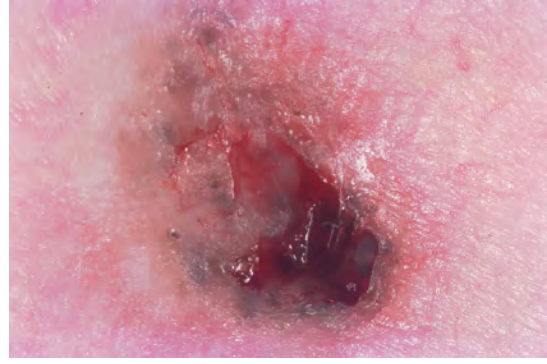

Case240: basal cell carcinoma

**SkinGPT-R1 Response:**

<think> Okay, let's see. The patient is a female with a lesion on the back that's palpable. The image shows displays it's a clinical photo with a irregularly shaped, irregularly pigmented area. The dermoscopic features include diffuse irregular pigmentation, arborizing vascular structures, and irregular dots and globules. The seven-point score is 2, which is low, but the diagnostic difficulty is medium. The key here is to match the dermoscopic features to the diagnosis. Basal cell carcinoma often has arborizing vascular patterns and may have irregular pigmentation. Melanoma can have irregular pigmentation and vascular structures, but the presence of regression structures or atypical melanocytic features might be present. However, the image displays regression structures are absent. The vascular structures here are arborizing, which is more common in basal cell carcinoma. The pigmentation is diffuse and irregular, which can be seen in both. But since the score is low, maybe it's not a high-risk melanoma. Blue nevus usually has blue-gray color and may not have the same vascular patterns. Clark nevus is deeper but might not have the same surface irregularity. Dermatofibroma is usually flesh-colored and lacks pigmentation. Vascular lesions like hemangiomas might have similar vascular patterns but not the same pigmentation. Lentigo is a flat lesion with uniform pigmentation. Seborrheic keratosis has a warty surface and hyperkeratosis, which isn't mentioned here. The key is the combination of arborizing vascular structures and irregular pigmentation. Basal cell carcinoma can present with those features. Melanoma might have irregular pigmentation but often has other features like regression, which is absent here. So the most likely diagnosis is basal cell carcinoma. </think><answer> Final Answer:basal cell carcinoma </answer>

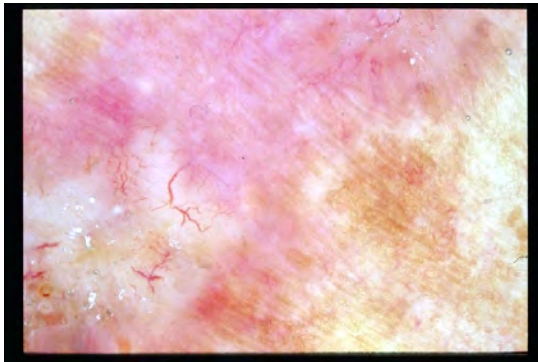

Case239: basal cell carcinoma

**SkinGPT-R1 Response:**

<think> Okay, let's see. The patient is a male with a palpable lesion on the head and neck. The dermoscopy image shows arborizing vascular structures. The 7-point checklist has most points absent, except vascular structures. The image displays displays no pigmentation, regression, dots, globules, or blue whitish veil. The management is excision, and the diagnostic difficulty is medium. Basal cell carcinoma often has arborizing vascular patterns on dermoscopy. Melanoma usually has irregular pigmentation, which is absent here. Blue nevus and Clark nevus might have different vascular patterns, but the image doesn't mention blue or black areas. Dermatofibroma typically doesn't show vascular structures like arborizing. So the most likely diagnosis is basal cell carcinoma. </think><answer> Final Answer:basal cell carcinoma </answer>

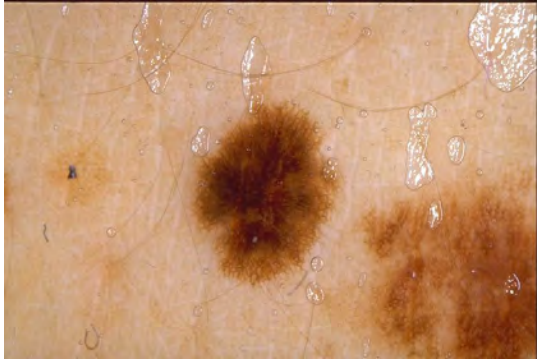

Case241: clark nevus

**SkinGPT-R1 Response:**

<think> Okay, let's see. The patient is a female with a flat lesion on the back. The dermoscopy image shows a brownish area with a typical pigment network, no streaks, regression structures, dots, globules, or blue whitish veil. Vascular structures are also absent. The seven-point score is 0. The image displays displays it's consistent with a common acquired nevus, specifically a Clark nevus. The alternatives include Clark nevus. So the answer should be Clark nevus. </think><answer> Final Answer:clark nevus </answer>

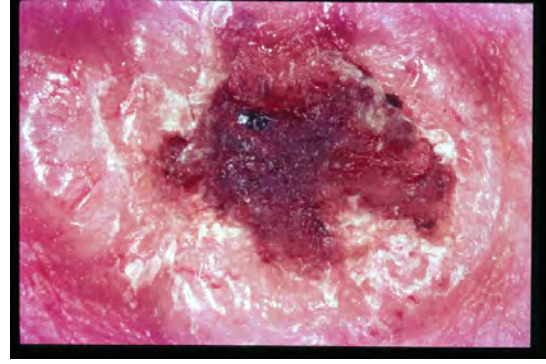

Case243: basal cell carcinoma

**SkinGPT-R1 Response:**

<think> Okay, let's see. The patient is a male with a nodular lesion on the back. The dermoscopic features mentioned are arborizing vascular structures. The 7-point checklist shows absent for pigment network, streaks, pigmentation, regression structures, dots and globules, and blue whitish veil. So, dermoscopy is key here. Arborizing vascular structures are a common finding in basal cell carcinomas. Melanomas usually have other features like irregular pigmentation, irregular streaks, or regression signs, which are all absent here. Since the vascular pattern is arborizing and there's no other melanoma-related features, the most likely diagnosis is basal cell carcinoma. The other alternatives like melanoma are ruled out because the checklist shows those features are absent. So the answer should be basal cell carcinoma. </think><answer> Final Answer:basal cell carcinoma </answer>

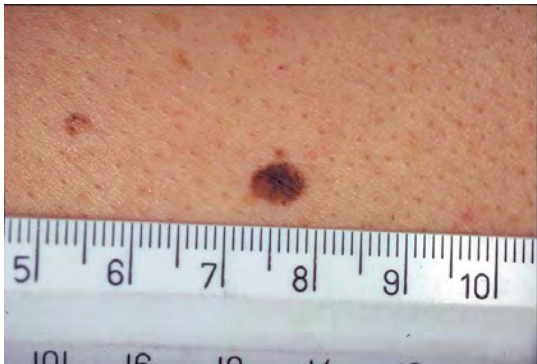

Case242: clark nevus

**SkinGPT-R1 Response:**

<think> Okay, let's see. The patient is a female with a flat lesion on the back. The dermoscopic checklist shows typical pigment network, diffuse regular pigmentation, and no streaks, regression structures, dots, globules, blue whitish veil, or vascular structures. The lesion is small, within the typical range for a Clark nevus. The image displays displays it's a small, flat, round lesion with uniform pigmentation, which aligns with a Clark nevus. Since the diagnostic difficulty is low and the features match a Clark nevus, the most likely diagnosis is Clark nevus. </think><answer> Final Answer:clark nevus </answer>

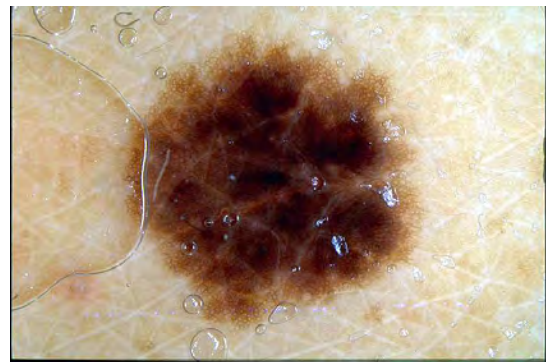

Case244: clark nevus

**SkinGPT-R1 Response:**

<think> Okay, let's see. The patient is a male with a flat lesion on the back. The dermoscopy image shows a circular, uniform brownish area with a typical pigment network. The 7-point checklist displays pigment network is typical, streaks are absent, pigmentation is diffuse regular, and regression structures, dots/globules, blue whitish veil, vascular structures are all absent. The seven-point score is 0. The image displays displays it's consistent with a common acquired nevus, specifically a Clark nevus. The alternatives include Clark nevus. So the answer should be Clark nevus. </think><answer> Final Answer:clark nevus </answer>

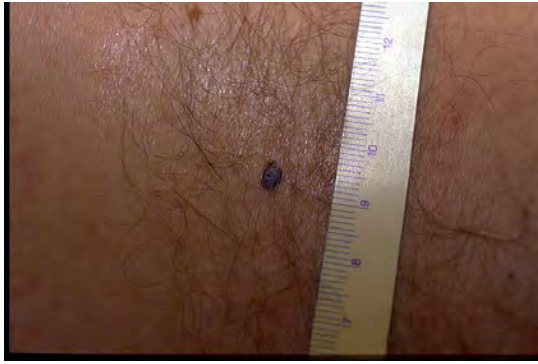

Case245: clark nevus

**SkinGPT-R1 Response:**

<think> Okay, let's see. The patient is a male with a palpable lesion on the back. The dermoscopic features mentioned are typical pigment network, diffuse regular pigmentation, regular dots and globules, and no streaks, regression structures, blue whitish veil, or vascular structures. The seven-point score is 0. The image displays displays the lesion is small, consistent with a Clark nevus. Clark nevi are usually small, pigmented lesions that can be raised. Since the score is 0, that might indicate a low risk. The alternatives include Clark nevus, which is a type of nevus. The other alternatives like melanoma or basal cell carcinoma don't fit here because the features don't show atypical changes. So the most likely diagnosis is Clark nevus. </think><answer> Final Answer:clark nevus </answer>

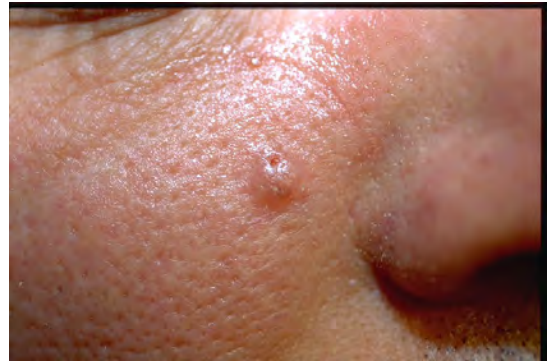

Case247: basal cell carcinoma

**SkinGPT-R1 Response:**

<think> Okay, let's see. The patient is a male with a nodular lesion on the head and neck. The image shows a raised, slightly erythematous area. The dermoscopic checklist shows no pigment network, streaks, pigmentation, regression structures, dots and globules, blue whitish veil, or vascular structures. The management is excision, and the diagnostic difficulty is high. Basal cell carcinoma often presents as a nodular lesion, which matches the image. Since there's no mention of pigmentation or other features typical of melanoma, like irregular borders or color variation, basal cell carcinoma seems more likely. The absence of dermal or vascular structures also points away from melanoma. So the most probable diagnosis is basal cell carcinoma. </think><answer> Final Answer:basal cell carcinoma </answer>

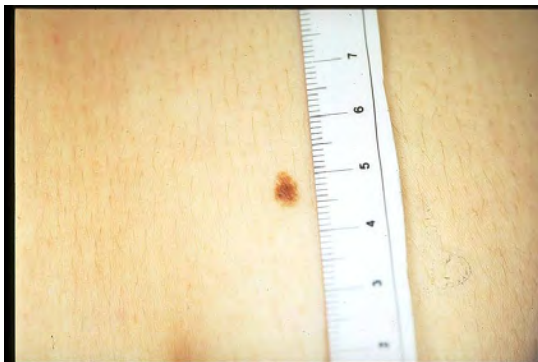

Case246: clark nevus

**SkinGPT-R1 Response:**

<think> Okay, let's see. The patient is a female with a flat lesion on the abdomen. The dermoscopic checklist shows typical pigment network, no streaks, pigmentation, regression structures, dots/globules, blue whitish veil, or vascular structures. The seven-point score is 0. The image displays displays it's a small, flat, brownish lesion. Since the dermoscopic features are typical for a nevus and there's no atypical features mentioned, like irregular borders or asymmetry, which are common in melanomas. The location is abdomen, which is a common site for nevi. The size is small, so probably not melanoma. The answer should be clark nevus. </think><answer> Final Answer:clark nevus </answer>

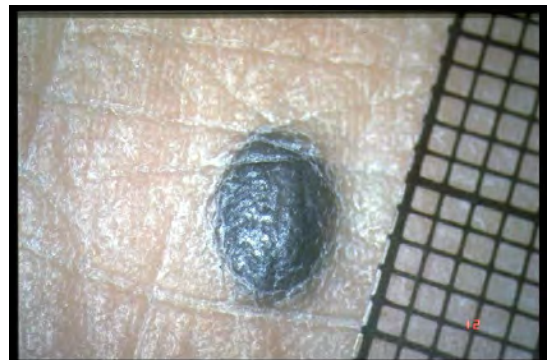

Case248: blue nevus

**SkinGPT-R1 Response:**

<think> Okay, let's see. The patient is a female with an acral lesion that's nodular. The dermoscopic checklist shows no pigment network, streaks, regression structures, dots, globules, blue whitish veil, or vascular structures. The pigmentation is diffuse and regular. The image displays displays it's a small, raised, irregularly shaped lesion on the acral area. The diagnostic difficulty is low, and the seven-point score is 0. Hmm, acral location, nodular, no atypical structures. Diffuse regular pigmentation. Since there's no regression, streaks, or other atypical features, it's probably a benign lesion. Blue nevus often has a blue-gray color and may be nodular. Dermatofibroma is another possibility, but those are usually firm and raised with a palpable base. The image displays displays it's small, which might lean more towards a nevus. But the patient is a female, and acral location. Blue nevus can occur on the acral area. Let me check the alternatives. Blue nevus is an option. Alternatively, dermatofibroma. But the image displays displays no atypical structures, so maybe not dermatofibroma. The answer is likely blue nevus. </think><answer> Final Answer:blue nevus </answer>

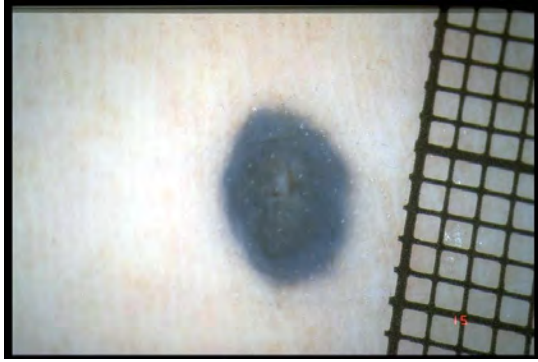

Case249: blue nevus

**SkinGPT-R1 Response:**

<think> Okay, let's see. The patient is a female with an acral lesion that's nodular. The dermoscopy image shows diffuse regular pigmentation without any network, streaks, regression structures, dots, globules, blue whitish veil, or vascular structures. The seven-point score is 0. The image displays displays it's consistent with a blue nevus. The alternatives include blue nevus as one of the choices. Since the dermoscopy findings align with blue nevus features and there's no mention of features that would suggest melanoma or other lesions, the most likely diagnosis is blue nevus. </think><answer> Final Answer:blue nevus </answer>

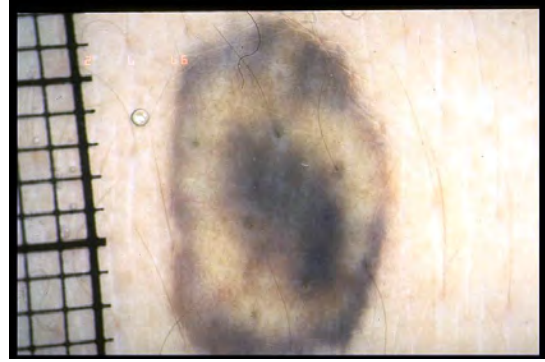

Case251: blue nevus

**SkinGPT-R1 Response:**

<think> Okay, let's see. The patient is a female with a nodular lesion on the upper limb. The dermoscopy image shows a blue-whitish veil, which is a key finding. The 7-point checklist has a score of 2, which might indicate something less typical, but the presence of the blue-whitish veil stands out. Melanomas can have various pigmentation patterns, and the blue-whitish veil is sometimes associated with blue nevi or dysplastic nevi. However, the lesion is nodular, which is more indicative of a melanoma. But wait, the blue nevus can present as a blue lesion. Wait, the image displays displays the lesion is dark and irregular, which might be a melanoma. But the blue-whitish veil is a feature of blue nevi. Hmm. The checklist shows pigment network is typical, streaks and pigmentation are absent, regression structures are absent. The blue-whitish veil is present. Blue nevi can have a blue color and a whitish veil. But the lesion is nodular. Melanomas can be nodular. Wait, but the blue nevus is a type of nevus. The management is excision, which is common for melanomas. But the diagnostic difficulty is medium. The seven-point score is 2, which might mean it's not a high-risk melanoma. But the blue-whitish veil is a key feature of blue nevus. However, the lesion is nodular. Wait, blue nevi can be nodular. But the presence of the blue-whitish veil might lean towards a blue nevus. However, the image displays displays the lesion is dark and irregular, which is more typical of a melanoma. Hmm. This is a bit confusing. But the question is to choose the most likely diagnosis. The alternatives include blue nevus and melanoma. The blue-whitish veil is a classic sign of a blue nevus. But the lesion is nodular. Blue nevi can be nodular. Wait, but melanomas can be nodular as well. However, the blue nevus is a type of nevus. The presence of the blue-whitish veil is a strong indicator for blue nevus. But the lesion is dark and irregular. Maybe it's a melanoma with a blue component. But the blue nevus is a distinct diagnosis. The checklist shows pigment network is typical, which might be seen in both. The absence of streaks and pigmentation rules out other types. The blue-whitish veil is a key feature for blue nevus. So maybe the diagnosis is blue nevus. But the lesion is nodular. Blue nevi can be nodular. So the answer might be blue nevus. But the image displays displays the lesion is dark and irregular, which is more typical of a melanoma. Hmm. This is a bit conflicting. But the presence of the blue-whitish veil is a strong clue for blue nevus. So maybe the answer is blue nevus. But the lesion is nodular. Blue nevi can be nodular. So I think the answer is blue nevus. </think><answer> Final Answer:blue nevus </answer>

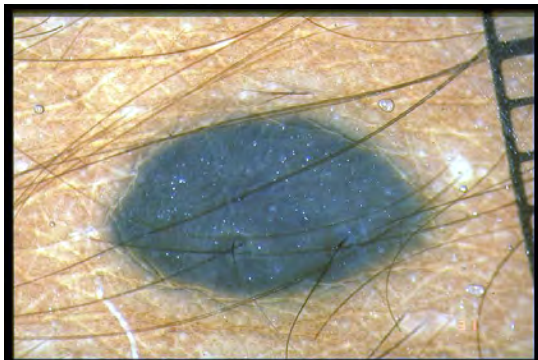

Case250: blue nevus

**SkinGPT-R1 Response:**

<think> Okay, let's see. The patient is a male with a palpable lesion on the lower limbs. The dermoscopy image shows diffuse regular pigmentation without any network, streaks, regression structures, dots, globules, blue whitish veil, or vascular structures. The seven-point score is 0. The image displays displays it's consistent with a blue nevus. Blue nevi are known to have uniform pigmentation without the atypical features that might suggest melanoma. Since there's no mention of irregularities or atypia, and the score is 0, the most likely diagnosis is blue nevus. </think><answer> Final Answer:blue nevus </answer>

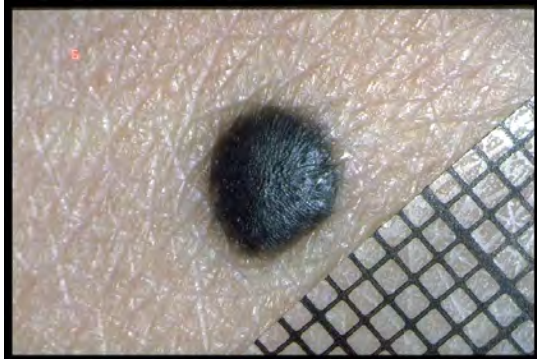

Case252: blue nevus

**SkinGPT-R1 Response:**

<think> Okay, let's see. The patient is a male with a nodular lesion on the acral area. The dermoscopic checklist shows no pigment network, streaks, regression structures, blue whitish veil, or vascular structures. The pigmentation is diffuse and regular, and the dots and globules are regular. The lesion is elevated and the image displays displays it's consistent with a blue nevus. The diagnostic difficulty is low, and the seven-point score is 0. Blue nevus is one of the alternatives here. The other alternatives like melanoma or basal cell carcinoma don't fit because the dermoscopic features mentioned (absence of network, streaks, regression, etc.) are typical of a blue nevus. So the answer should be blue nevus. </think><answer> Final Answer:blue nevus </answer>

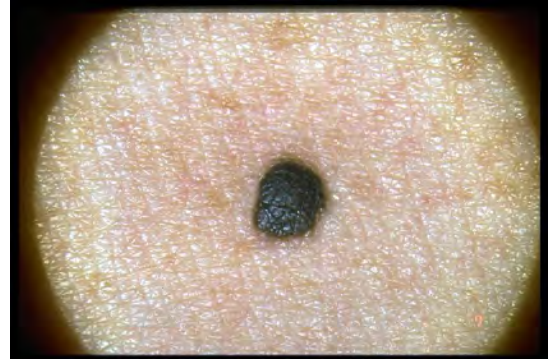

Case254: dermal nevus

**SkinGPT-R1 Response:**

<think> Okay, let's see. The patient is a female with a palpable lesion on the upper limb. The dermoscopic checklist shows absent pigment network, streaks, pigmentation, regression structures, and blue whitish veil. Vascular structures are also absent. The dots and globules are regular. The seven-point score is 0. The image displays displays a dark, irregularly shaped lesion with a rough surface, no distinct features of melanoma like irregular pigmentation or structure. The lesion is small, so probably not melanoma over 1.5 mm. Since the dermoscopic findings are typical of a dermal nevus, and the management is no further examination, the diagnosis is likely dermal nevus. </think><answer> Final Answer:dermal nevus </answer>

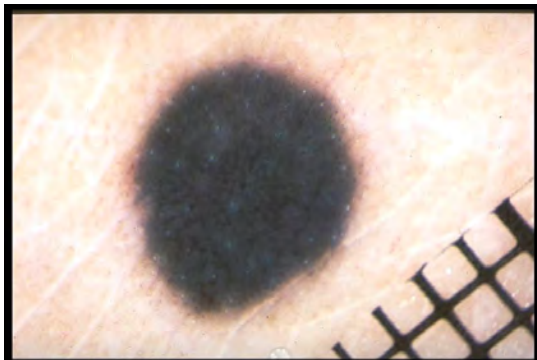

Case253: blue nevus

**SkinGPT-R1 Response:**

<think> Okay, let's see. The patient is a male with an acral lesion that's nodular. The dermoscopy image shows diffuse regular pigmentation, regular dots and globules, and no pigment network, streaks, regression structures, or blue whitish veil. The vascular structures are also absent. The seven-point score is 0. The image displays displays it's consistent with a blue nevus. Blue nevi typically have those features: diffuse pigmentation, regular dots, and lack of other structures. Since the score is 0, that might mean it's a benign lesion. So the diagnosis should be blue nevus. </think><answer> Final Answer:blue nevus </answer>

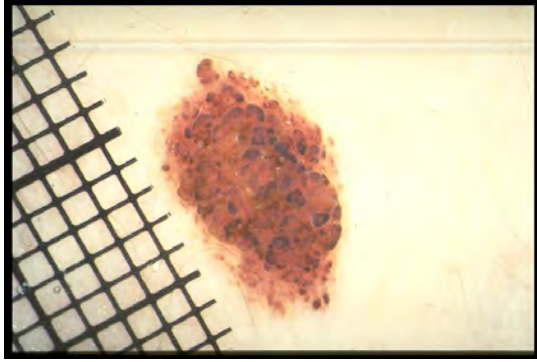

Case255: dermal nevus

**SkinGPT-R1 Response:**

<think> Okay, let's see. The patient is a male with a nodular lesion on the upper limbs. The dermoscopy image shows regular dots and globules, and the 7-point checklist shows pigment network, streaks, pigmentation, regression structures, and vascular structures are all absent. Blue whitish veil is also absent. The lesion is nodular, and the diagnostic difficulty is low. The seven-point score is 0. Hmm, dermoscopy features are key here. Regular dots and globules might indicate a benign lesion. Since pigment network, streaks, and other features are absent, that rules out melanoma. Blue nevus often has blue globules, but the image displays displays regular dots and globules. Wait, blue nevus can have blue globules, but maybe the term "regular" here is important. Basal cell carcinoma can present as a nodular lesion, but dermoscopy might show different features. However, the absence of pigment network and other melanoma markers makes me think it's not melanoma. Dermal nevus is another option, but the lesion is nodular. Wait, nodular lesions can be seen in various nevi. But the key here is the dermoscopy features. Since the checklist shows no regression structures, which are common in melanomas, that's a point against melanoma. The seven-point score is 0, which might mean it's a benign lesion. Blue whitish veil is absent, which is a feature of some melanomas. So putting it all together, the most likely diagnosis is dermal nevus. </think><answer> Final Answer:dermal nevus </answer>

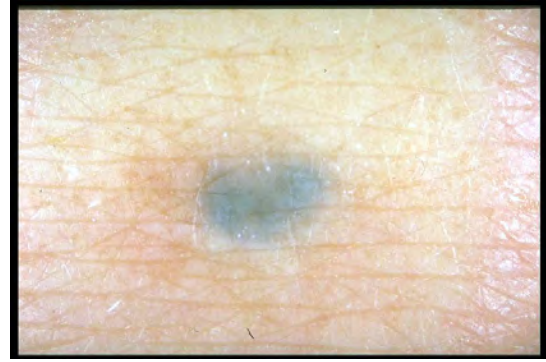

Case256: blue nevus

**SkinGPT-R1 Response:**

<think> Okay, let's see. The patient is a female with a lesion on the lower limb. The image is a clinical photo, and the metadata includes a seven-point checklist. The key points from the checklist are that there's a blue-whitish veil present, pigment network is typical, streaks and other structures are absent. The lesion is palpable, and the diagnostic difficulty is low. The seven-point score is 2, which might indicate something like a blue nevus or another benign lesion. The blue-whitish veil is a characteristic feature of a blue nevus. Since the other structures like streaks, regression, dots, etc., are absent, that rules out melanoma. The lesion is on the lower limb, which is a common site for blue nevi. The elevation is palpable, but blue nevi can be raised. The score of 2 might be low, but the presence of the blue-whitish veil is a strong indicator. So the most likely diagnosis is blue nevus. </think><answer> Final Answer:blue nevus </answer>

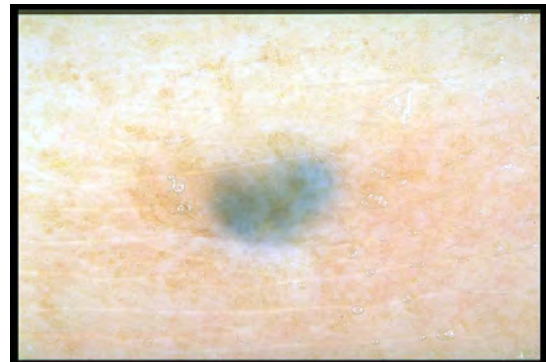

Case257: blue nevus

**SkinGPT-R1 Response:**

<think> Okay, let's see. The patient is a female with a lesion on the lower limbs. The dermoscopy image shows a blue-whitish veil, which is a key finding. The 7-point checklist has a score of 2, which might indicate something less worrisome, but the presence of the blue-whitish veil is mentioned. Blue nevus is known to have that blue color, often with a whitish veil. The other features like pigment network typical, streaks absent, etc., fit with a blue nevus. Since the management is no further examination, it's likely a benign lesion. So the diagnosis should be blue nevus. </think><answer> Final Answer:blue nevus </answer>

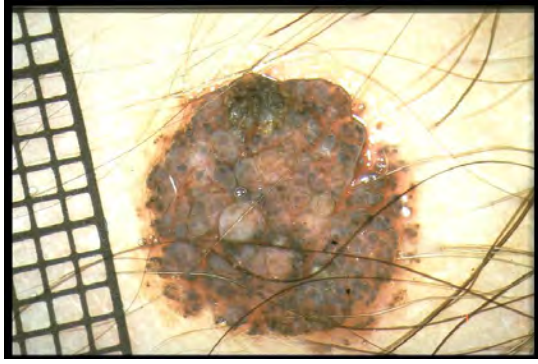

Case258: dermal nevus

**SkinGPT-R1 Response:**

<think> Okay, let's see. The patient is a male with a nodular lesion on the abdomen. The dermoscopy image shows regular dots and globules, and the 7-point checklist shows pigment network, streaks, pigmentation, regression structures, and vascular structures are all absent. Blue whitish veil and blue nevus are ruled out. The lesion is elevated and has regular dots and globules, which might be consistent with a benign lesion. But wait, the alternatives include melanoma variants. However, the image displays the lesion is nodular and the dermoscopy shows regular dots and globules. Melanomas can have irregular structures, but here it's regular. Maybe a dermal nevus or Clark nevus? But the location is abdomen, which is a common site for dermal nevi. However, the presence of regular dots and globules might lean towards a benign nevus. But the diagnostic difficulty is low, so maybe it's a common lesion. Alternatively, could it be a melanoma? But the checklist shows regression structures are absent, and the size isn't mentioned. Wait, the patient's sex is male, lesion location is abdomen. Dermal nevi are more common in certain areas, but not exclusive. The key here is the dermoscopic features. Regular dots and globules are seen in benign nevi. Melanomas usually have irregular structures, irregular pigmentation, or other atypical features. Since the checklist shows those are absent, and the score is 0, which might indicate a benign lesion. But the answer alternatives include dermal nevus. So maybe the diagnosis is dermal nevus. But the user wants the most likely diagnosis. Given the information, the answer is dermal nevus. </think><answer> Final Answer:dermal nevus </answer>

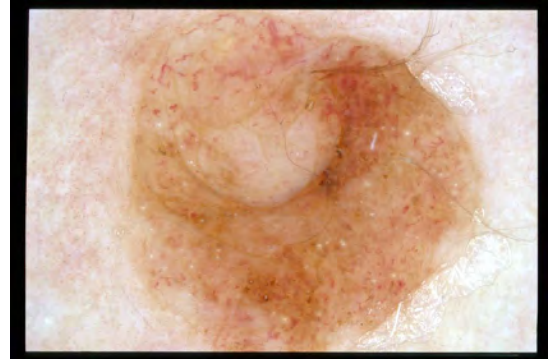

Case259: dermal nevus

**SkinGPT-R1 Response:**

<think> Okay, let's see. The patient is a female with a palpable lesion on the abdomen. The dermoscopy image shows regular dots and globules, comma-shaped vascular structures, and no pigment network, streaks, pigmentation, or regression structures. The seven-point score is 0. The image displays displays it's consistent with a dermal nevus. Dermal nevi are usually raised, have regular dots and globules, and lack the other features like pigment network or streaks. Since the score is 0 and the features match, the diagnosis should be dermal nevus. </think><answer> Final Answer:dermal nevus </answer>

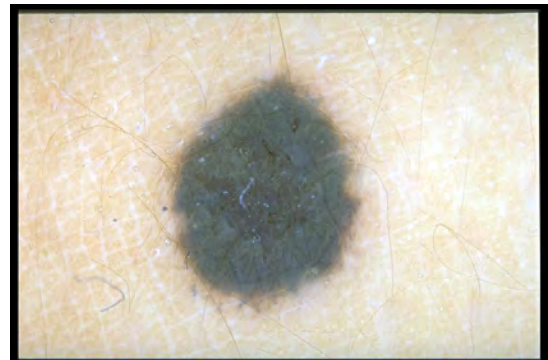

Case260: blue nevus

**SkinGPT-R1 Response:**

<think> Okay, let's see. The patient is a female with a nodular lesion on the upper limbs. The dermoscopy image shows diffuse regular pigmentation without pigment network, streaks, regression structures, dots, globules, blue whitish veil, or vascular structures. The seven-point score is 0. The image displays displays it's consistent with a blue nevus. The alternatives include blue nevus. Since the dermoscopy doesn't show any atypical features and the score is 0, which might indicate a benign lesion. Blue nevus typically has a blue-gray color and lacks the other structures mentioned. So the diagnosis should be blue nevus. </think><answer> Final Answer:blue nevus </answer>

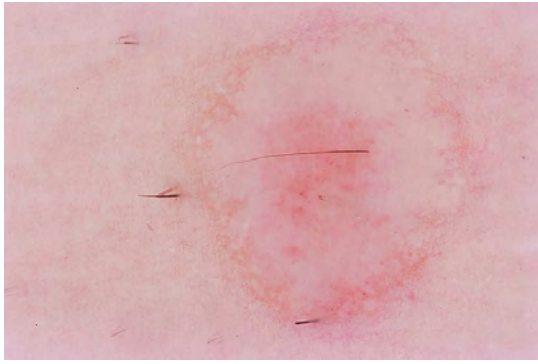

Case261: dermal nevus

**SkinGPT-R1 Response:**

<think> Okay, let's see. The patient is a male with a palpable lesion on the chest. The dermoscopy image shows a seven-point score of 2. The annotations mention typical pigment network, absent streaks, pigmentation, regression structures, dots and globules, and blue whitish veil. Vascular structures are dotted. The image displays displays it's a small, flat lesion with a dotted vascular pattern. The dermoscopic features are consistent with a benign lesion. The alternatives include dermal nevus, Clark nevus, blue nevus, etc. Since the lesion is small and flat, and the vascular pattern is dotted, dermal nevus comes to mind. Clark nevus is usually thicker and may have more irregular pigmentation. Blue nevus would have blue-gray color. The seven-point score of 2 might indicate a lower risk, but the score itself isn't one of the alternatives. However, the key here is the dermoscopic features. Dermal nevus typically presents as a small, flat lesion with a dotted vascular pattern. So the answer should be dermal nevus. </think><answer> Final Answer:dermal nevus </answer>

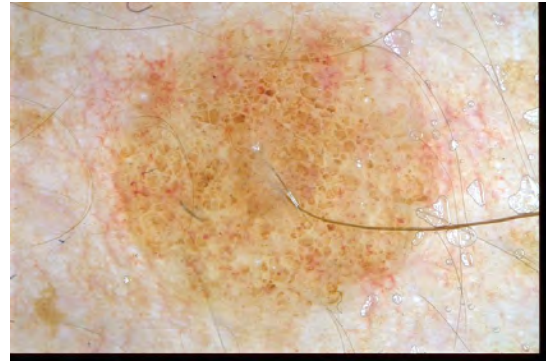

Case263: dermal nevus

**SkinGPT-R1 Response:**

<think> Okay, let's see. The patient is a female with a back lesion that's palpable. The dermoscopy image shows regular dots and globules, comma-shaped vascular structures, and no pigment network, streaks, pigmentation, or regression structures. The seven-point score is 0. The image displays displays it's consistent with a dermal nevus. Dermal nevi are usually flat or slightly raised, have regular dots and globules, and lack the other features like pigment network or streaks which are more common in junctional or intradermal nevi. Since the vascular structures are comma-shaped, that might be a clue for a dermal nevus. The absence of other features like regression or atypical pigmentation supports that. So the diagnosis should be dermal nevus. </think><answer> Final Answer:dermal nevus </answer>

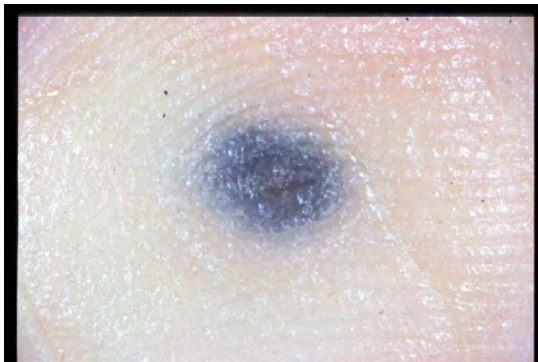

Case262: blue nevus

**SkinGPT-R1 Response:**

<think> Okay, let's see. The patient is a male with a flat, acral lesion. The dermoscopic checklist shows no pigment network, streaks, regression structures, dots, globules, blue whitish veil, or vascular structures. The pigmentation is diffuse and regular. The image displays displays a uniform, dark area without irregularities. The seven-point score is 0. Melanoma usually has at least some of those dermoscopic features like irregular pigmentation, streaks, or regression structures. Since all those are absent, and the pigmentation is regular and diffuse, this might be a benign lesion. Blue nevus often presents as a blue or bluish-black lesion, which can be flat and acral. The absence of other features supports that. Basal cell carcinoma is usually raised with other features like ulceration or telangiectasia, which aren't mentioned here. So the most likely diagnosis is blue nevus. </think><answer> Final Answer:blue nevus </answer>

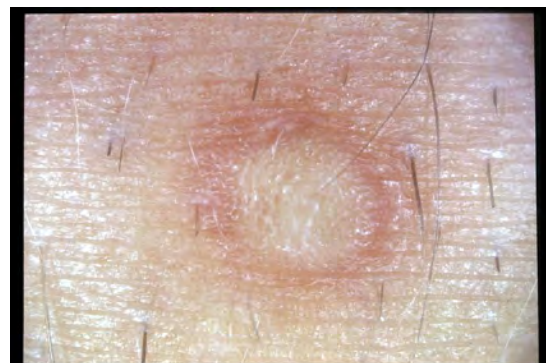

Case264: dermatofibroma

**SkinGPT-R1 Response:**

<think> Okay, let's see. The patient is a female with a lesion on the lower limbs. The image is a clinical photo, not a dermoscopy. The metadata shows the lesion is palpable and the dermoscopic checklist has all features absent. The seven-point score is 0. So, dermoscopy isn't helpful here. The key point is that all dermoscopic features are absent. The lesion is raised and palpable. Common possibilities could be something like a dermatofibroma, seborrheic keratosis, or maybe a nevus. But since the dermoscopic features are all absent, that rules out melanoma, Clark nevus, etc. The alternatives include dermatofibroma. Let me think. Dermatofibroma is a benign lesion, usually raised, with a firm consistency. It's common on the lower limbs. Since the dermoscopic features are absent, and the lesion is palpable, dermatofibroma fits. The other alternatives like melanoma or nevus are ruled out because the dermoscopic checks are all negative. So the answer should be dermatofibroma. </think><answer> Final Answer:dermatofibroma </answer>

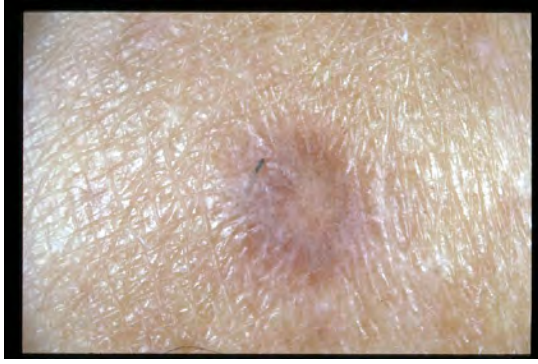

Case265: dermatofibroma

**SkinGPT-R1 Response:**

<think> Okay, let's see. The patient is a male with a lesion on the lower limbs that's palpable. The clinical photo shows a small, flat lesion. The dermoscopic checklist has a score of 0, which probably means no atypical features. The metadata displays management as no further examination, so maybe it's considered benign. The features listed are typical pigment network, no streaks, pigmentation, regression structures, dots, globules, blue whitish veil, or vascular structures. All of these are typical for a benign lesion. Since it's on the lower limb and flat, dermatofibroma comes to mind. Dermatofibromas are common there, usually flat, and don't have the atypical features mentioned. The other alternatives like melanoma or nevus might be considered, but the absence of atypical features points away from those. So the diagnosis should be dermatofibroma. </think><answer> Final Answer:dermatofibroma </answer>

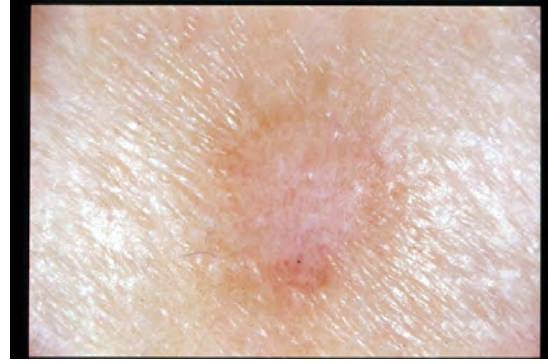

Case267: dermatofibroma

**SkinGPT-R1 Response:**

<think> Okay, let's see. The patient is a female with a flat lesion on the upper limb. The dermoscopic checklist shows typical pigment network, no streaks, pigmentation, regression structures, dots/globules, blue whitish veil, or vascular structures. The image displays displays a flat, slightly raised area with a slightly elevated center, uniform color, and no irregularities. The diagnosis needs to be made based on this. First, the key points here are the absence of streaks, pigmentation, regression structures, etc. That rules out melanomas of various types since those often have atypical pigmentation or structures like streaks or regression. The lesion is flat and uniform, which might suggest a benign lesion. Dermatofibroma is a common benign lesion that can be flat and located on the upper limb. The image also displays it's consistent with a dermatofibroma. Other alternatives like basal cell carcinoma might have a different appearance, possibly with ulceration or a pearly edge, but the patient's lesion is flat. Melanosis is hyperpigmentation, but the lesion here is depicted as a flat area with a slightly elevated center, not just hyperpigmentation. So melanosis might not fit. Clark nevus and blue nevus are types of nevi, but the checklist shows regression structures and dots/globules are absent, which might not be present in all nevi. However, the key here is the absence of other features. Since the dermoscopic features are typical and there's no atypia, the most likely diagnosis is dermatofibroma. </think><answer> Final Answer:dermatofibroma </answer>

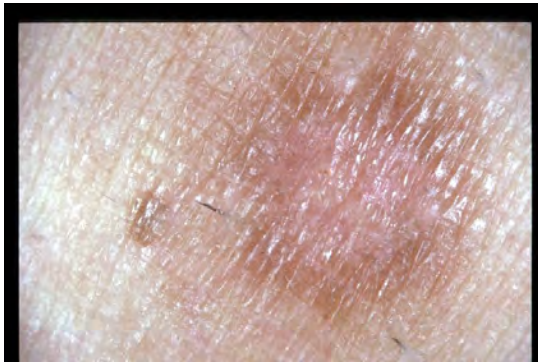

Case266: dermatofibroma

**SkinGPT-R1 Response:**

<think> Okay, let's see. The patient is a male with a flat lesion on the upper limbs. The dermoscopic checklist shows typical pigment network, absent streaks, pigmentation, regression structures, dots and globules are regular, no blue whitish veil, and vascular structures. The seven-point score is 0. The image displays displays the skin is smooth, no irregular pigmentation, and the lesion is flat. The key here is that the lesion is flat and the dermoscopic features are typical. Since the score is 0, that might mean it's not a high-risk lesion. The alternatives include melanoma in situ, but the image doesn't show any atypical features. Dermatofibroma is a possibility because it's a flat, raised lesion on the upper limb. The other alternatives like melanoma or nevus would have different dermoscopic features. Since the streaks and regression are absent, and pigmentation is absent, it's more likely a benign lesion. So the diagnosis is probably dermatofibroma. </think><answer> Final Answer:dermatofibroma </answer>

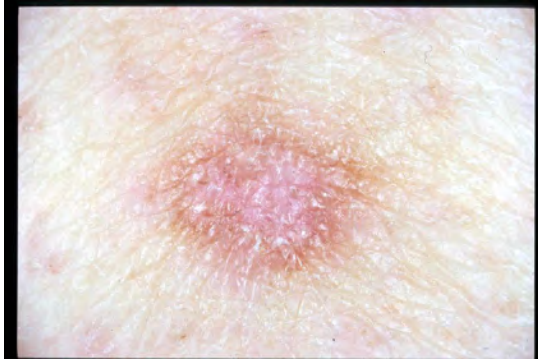

Case268: dermatofibroma

**SkinGPT-R1 Response:**

<think> Okay, let's see. The patient is a female with a palpable lesion on the upper limb. The clinical photo shows an elevated, slightly raised area with a slightly reddish tint. The dermoscopic features mentioned are typical pigment network, no streaks, absent pigmentation, no regression structures, irregular dots and globules, no blue whitish veil, and vascular structures that are comma-shaped. The seven-point score is 1, which is low. The image displays displays it's consistent with a dermatofibroma. Dermatofibromas are usually raised, have a red-dish tint, and on dermoscopy, they might show a comma-shaped vascular pattern. The other alternatives like melanoma or basal cell carcinoma might have different features. Since the dermoscopic findings align with dermatofibroma and the score is low, the diagnosis should be dermatofibroma. </think><answer> Final Answer:dermatofibroma </answer>

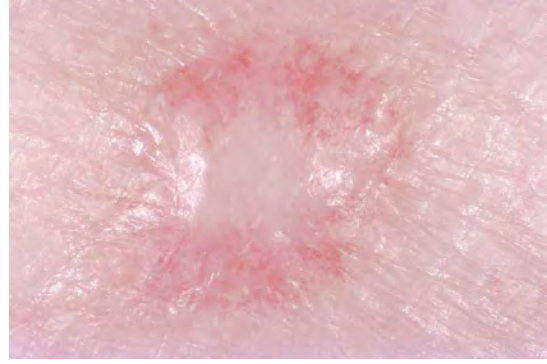

Case269: dermatofibroma

**SkinGPT-R1 Response:**

<think> Okay, let's see. The patient is a female with a lesion on the lower limbs that's palpable. The clinical photo shows a pinkish area with some irregularities. The dermoscopic checklist has a score of 0, which is low. The annotations mention typical pigment network, absent streaks, pigmentation, regression structures, dots and globules as regular, no blue whitish veil or vascular structures. The diagnostic difficulty is low, and the management doesn't require further exam. So, the key here is the dermoscopic findings. A score of 0 might seem low, but the presence of typical pigment network and regular dots and globules could be indicative. However, since the score is 0, maybe it's a benign lesion. But the lesion is palpable and on the lower limbs. Dermatofibroma is a possibility. Vascular lesions are ruled out. Melanoma alternatives are there, but the score is low. Maybe it's a Clark nevus or dermal nevus. But the patient is a female, and the lesion is on the lower limbs. Dermatofibroma is a common lesion in that area. The regular dots and globules might be consistent with a nevus. Since the diagnostic difficulty is low, and the management doesn't need further exam, maybe it's a benign lesion. So the answer is dermatofibroma. </think><answer> Final Answer:dermatofibroma </answer>

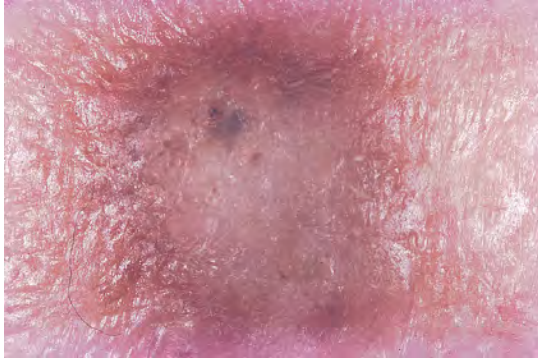

Case270: dermatofibroma

**SkinGPT-R1 Response:**

<think> Okay, let's see. The patient is a male with a palpable lesion on the lower limbs. The clinical photo shows a pinkish area with irregular texture and slight elevation. The dermoscopic checklist has a score of 0, which probably means no specific features. The metadata displays management as no further examination, and diagnostic difficulty is low. The key here is that the dermoscopic features are absent for all the listed criteria like pigment network, streaks, regression structures, etc. The lesion is palpable and on the lower limbs. Common lesions in that area could be something like a dermatofibroma, which is a common benign tumor. Basal cell carcinoma is also a possibility, but they often have specific features like ulceration or a pearly edge, which aren't mentioned here. Melanoma is a concern, but the absence of streaks, regression, or other atypical features makes it less likely. Since the score is 0, maybe it's a benign lesion. Dermatofibroma fits here because it's a palpable, well-circumscribed lesion on the lower limbs. So the diagnosis is probably dermatofibroma. </think><answer> Final Answer:dermatofibroma </answer>

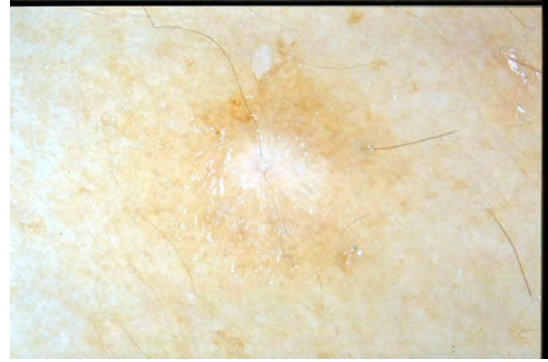

Case272: dermatofibroma

**SkinGPT-R1 Response:**

<think> Okay, let's see. The patient is a female with a lesion on the lower limbs. The dermoscopy image shows no pigment network, streaks, pigmentation, regression structures, dots and globules, blue whitish veil, or vascular structures. The lesion is elevated and palpable. The 7-point score is 0. The image displays displays it's consistent with a dermatofibroma. Dermatofibromas are usually raised, palpable, and lack the typical dermoscopic features like pigment networks or streaks. Since the metadata and image both point towards that, the diagnosis should be dermatofibroma. </think><answer> Final Answer:dermatofibroma </answer>

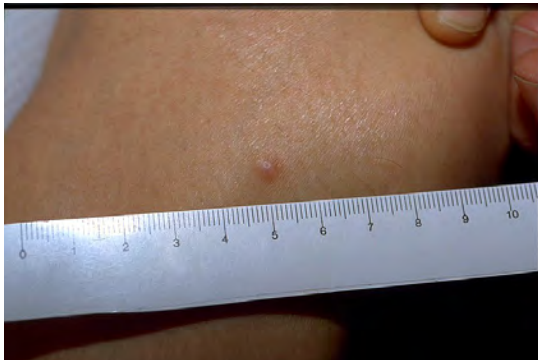

Case271: dermatofibroma

**SkinGPT-R1 Response:**

<think> Okay, let's see. The patient is a female with a palpable lesion on the lower limbs. The image is a clinical photo, and the dermoscopic checklist shows all features absent. The seven-point score is 0. The image displays displays it's a small, round, pinkish lesion, which is consistent with a dermatofibroma. Dermatofibromas are usually firm, raised, and have a pinkish hue. Since the dermoscopic features are all absent and the score is 0, that reinforces the idea that it's not a melanoma or other nevus. The location on the lower limbs also makes me think dermatofibroma is more common there. So the diagnosis should be dermatofibroma. </think><answer> Final Answer:dermatofibroma </answer>

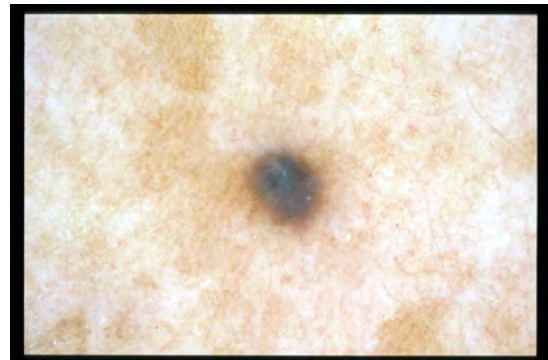

Case273: blue nevus

**SkinGPT-R1 Response:**

<think> Okay, let's see. The patient is a female with a flat lesion on the back. The dermoscopy image shows diffuse regular pigmentation without any streaks, regression structures, dots, globules, or vascular structures. The 7-point checklist has a score of 0, which probably means it's not a high-risk lesion. The image displays displays it's consistent with a blue nevus. Blue nevi are known to have diffuse pigmentation and lack the other features mentioned like streaks or regression. Since the lesion is flat and the metadata doesn't show any concerning features, the most likely diagnosis is blue nevus. </think><answer> Final Answer:blue nevus </answer>

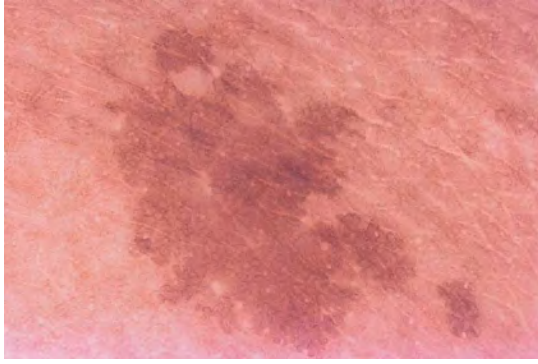

Case274: lentigo

**SkinGPT-R1 Response:**

<think> Okay, let's see. The patient is a female with a flat lesion on the back. The dermoscopy image shows a typical pigment network, no streaks, pigmentation, regression structures, dots/globules, blue whitish veil, or vascular structures. The seven-point score is 0. The metadata displays management as no further examination and diagnostic difficulty as low. So, dermoscopy is a key here. The absence of streaks, pigmentation, regression, and other structures that are typical for melanoma or other lesions. Since the score is 0, that might indicate a benign lesion. The lesion is flat, which could be a lentigo or a seborrheic keratosis. But the patient is a female, and the location is back. Lentigo is common in sun-exposed areas, especially in females. Seborrheic keratosis can be flat too. But the dermoscopy shows a typical pigment network. Wait, a typical pigment network might be seen in a common mole (nevus). But the lesion is flat. Hmm. Alternatively, a lentigo might present with a typical pigment network on dermoscopy. Since there's no atypical features, maybe it's a benign lesion. But the alternatives include lentigo. Let me check the list. The alternatives are lentigo, seborrheic keratosis, etc. The image displays the lesion is flat, and dermoscopy shows typical pigment network. So, lentigo is a type of pigmented lesion, often flat, with a typical network. So the diagnosis would be lentigo. </think><answer> Final Answer:lentigo </answer>

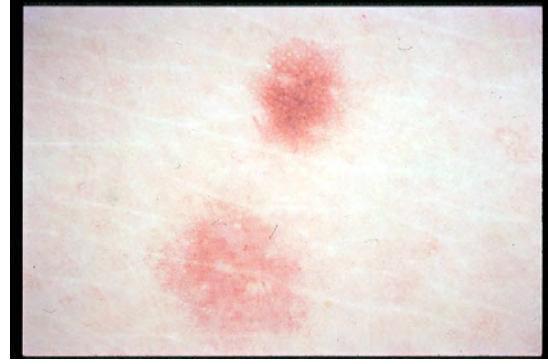

Case275: lentigo

**SkinGPT-R1 Response:**

<think> Okay, let's see. The patient is a male with a flat lesion on the upper limbs. The dermoscopy image shows typical pigment network, regular dots and globules, and no streaks, regression structures, blue whitish veil, or vascular structures. The seven-point score is 0. The metadata displays management as no further examination and diagnostic difficulty as low. So, dermoscopy is a key here. The absence of streaks, regression, and vascular structures is important. Typical pigment network and regular dots might point towards a benign lesion. Since it's flat and on the upper limbs, common benign lesions come to mind. Dermal nevus is a possibility. Blue nevus also has a blue tint, but the image doesn't mention blue. Lentigo is a flat brown spot, which matches the features. Melanoma would have irregular structures, which are absent here. Basal cell carcinoma is usually raised, but the lesion is flat. So, the most likely diagnosis is lentigo. </think><answer> Final Answer:lentigo </answer>

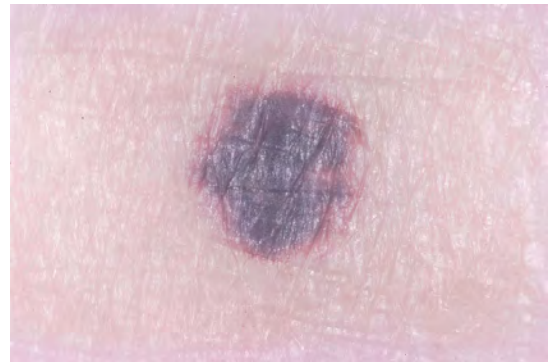

Case276: blue nevus

**SkinGPT-R1 Response:**

<think> Okay, let's see. The patient is a female with a flat lesion on the lower limbs. The dermoscopic checklist shows no pigment network, streaks, regression structures, dots/globules, blue whitish veil, or vascular structures. The pigmentation is diffuse and regular. The seven-point score is 0. Melanoma usually has at least some of those features like irregular pigmentation, streaks, or regression. Since all the key melanoma indicators are absent, and the lesion is flat and has regular pigmentation, it's more likely a benign lesion. Blue nevus often presents as a blue or bluish lesion, which might fit the image. Dermal nevus is another option, but the color here is diffuse and regular, not the typical brownish. Since the diagnostic difficulty is low and the score is 0, it's probably a blue nevus. </think><answer> Final Answer:blue nevus </answer>

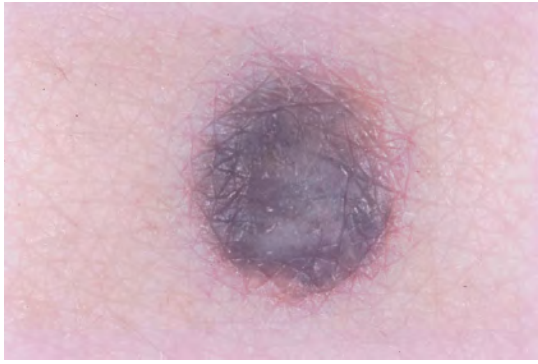

Case277: blue nevus

**SkinGPT-R1 Response:**

<think> Okay, let's see. The patient is a female with a lesion on the lower limb that's palpable. The clinical photo shows a blue-whitish veil and arborizing vascular structures. The dermoscopic checklist has a seven-point score of 2, with absent pigment network, streaks, and pigmentation. Regular dots and globules, and blue-whitish veil present. Vascular structures are arborizing. First, I need to recall what each of these features indicates. The blue-whitish veil is a common finding in blue nevi. Arborizing vascular structures might suggest a nevus as well. The absence of pigment network, streaks, and pigmentation rules out melanoma, since those are typical features of melanocytic lesions. The regular dots and globules could be seen in various nevi, but combined with the blue-whitish veil, it points more towards a blue nevus. Basal cell carcinoma usually has different vascular patterns, like telangiectasia or linear vessels, but not arborizing. Melanoma would have irregular pigmentation, which is absent here. So putting it all together, the most likely diagnosis is blue nevus. </think><answer> Final Answer:blue nevus </answer>

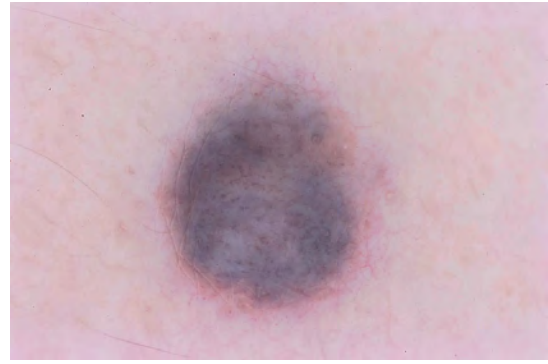

Case278: blue nevus

**SkinGPT-R1 Response:**

<think> Okay, let's see. The patient is a female with a lesion on the lower limbs. The dermoscopy image shows a blue-whitish veil and arborizing vascular structures. The 7-point checklist has a score of 2, with absent pigment network, streaks, and pigmentation. Regular dots and globules, and blue-whitish veil present. The image displays the lesion is elevated and palpable. The dermoscopic features mentioned are consistent with a blue nevus. Blue nevi often have a blue color, which might present as a blue-whitish veil. The vascular structures like arborizing might be seen in nevi. Since the score is 2, which is medium difficulty, but the key here is the dermoscopic features. Blue nevus is one of the alternatives listed. Let me check the alternatives again. The alternatives include blue nevus. So the answer should be blue nevus. </think><answer> Final Answer:blue nevus </answer>

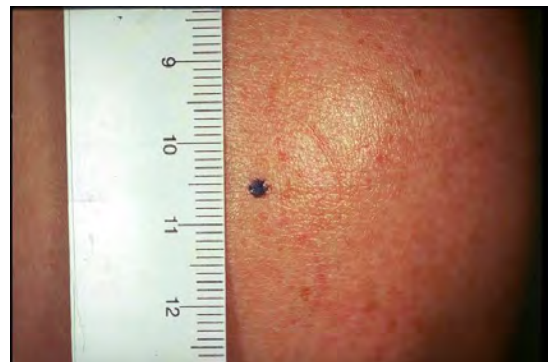

Case279: blue nevus

**SkinGPT-R1 Response:**

<think> Okay, let's see. The patient is a female with a lesion on the back that's palpable. The image shows a small, dark spot. The dermoscopic checklist has a seven-point score of 2. The key points from the image are the blue-whitish veil and regular dots and globules. The absence of pigment network, streaks, pigmentation, and regression structures is noted. The presence of blue-whitish veil and regular dots might point towards a blue nevus. Blue nevi often have those features. Since the lesion is small and the score is low, it's probably not melanoma. The alternatives include blue nevus, so that's likely the answer. </think><answer> Final Answer:blue nevus </answer>

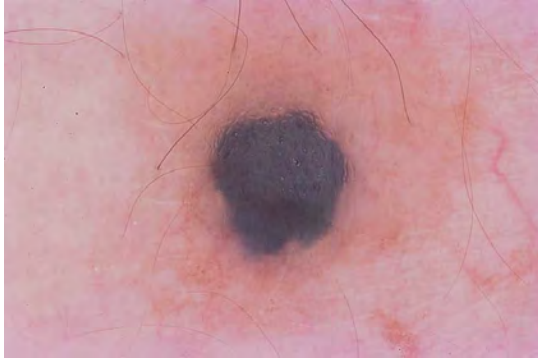

Case280: blue nevus

**SkinGPT-R1 Response:**

<think> Okay, let's see. The patient is a female with a lesion on the head and neck that's palpable. The dermoscopy image shows diffuse regular pigmentation without any streaks, regression structures, dots, globules, or vascular structures. The seven-point score is 0. The image displays displays it's a uniform pigmentation pattern, which is typical of a blue nevus. Blue nevi usually have a blue-gray color and a uniform texture. Since there's no atypical features mentioned like irregular borders, irregular pigmentation, or irregular structure, which are more indicative of melanoma, the most likely diagnosis here is blue nevus. The other alternatives like melanoma would have higher diagnostic difficulty, but the score is 0, so it's not that. Dermatofibroma is a different type of lesion, usually raised but not pigmented. So the answer should be blue nevus. </think><answer> Final Answer:blue nevus </answer>

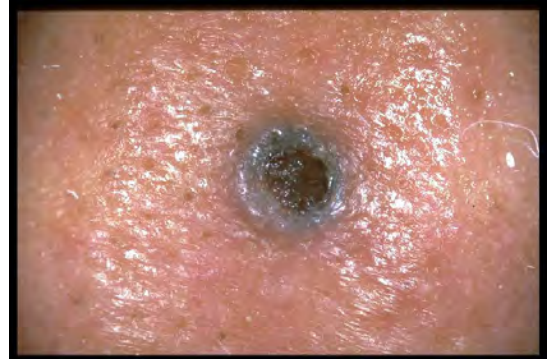

Case281: basal cell carcinoma

**SkinGPT-R1 Response:**

<think> Okay, let's see. The patient is a female with a palpable lesion on the head and neck. The clinical image shows a raised, irregularly shaped lesion with a central depression. The dermoscopic features mentioned are diffuse irregular pigmentation, absent pigment network, streaks, regression structures, dots and globules, blue whitish veil, and vascular structures. The seven-point score is 1, which is pretty low, indicating a low likelihood of melanoma. But the management is excision, so they want to be sure. Basal cell carcinoma often presents as a raised lesion with a central depression, which matches the image. The dermoscopic features like diffuse pigmentation without network or streaks might fit basal cell carcinoma. Since the score is low for melanoma, but the lesion is palpable and the location is on the head and neck, which are common sites for basal cell carcinoma. The absence of regression structures and other melanoma indicators like pigment network or streaks supports basal cell carcinoma. So the most likely diagnosis is basal cell carcinoma. </think><answer> Final Answer:basal cell carcinoma </answer>

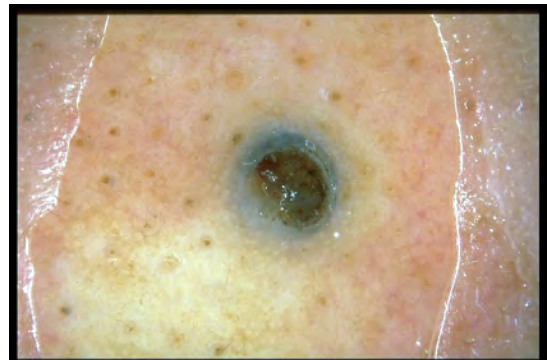

Case282: basal cell carcinoma

**SkinGPT-R1 Response:**

<think> Okay, let's see. The patient is a female with a lesion on the head and neck that's palpable. The dermoscopy image shows diffuse irregular pigmentation without pigment network, streaks, regression structures, dots, globules, blue whitish veil, or vascular structures. The seven-point score is 1, which is pretty low. High diagnostic difficulty. The image displays displays it's consistent with a basal cell carcinoma. The metadata also displays management by excision, which is common for basal cell carcinomas. So putting it all together, the most likely diagnosis is basal cell carcinoma. </think><answer> Final Answer:basal cell carcinoma </answer>

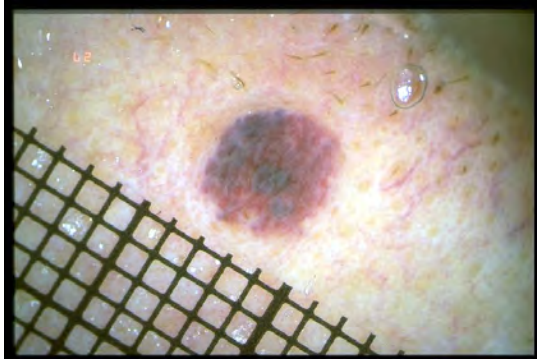

Case283: vascular lesion

**SkinGPT-R1 Response:**

<think> Okay, let's see. The patient is a female with a nodular lesion on the head and neck. The dermoscopy image shows a central hyperpigmented area with a vascular pattern. The 7-point checklist shows absent pigment network, streaks, pigmentation, regression structures, dots and globules, blue whitish veil, and vascular structures. The seven-point score is 0. The image displays displays it's consistent with a vascular lesion. So, the key points here are the central hyperpigmented area and vascular pattern. The absence of other features like pigment network, streaks, etc., rules out melanoma and other pigmented lesions. Since it's a vascular lesion, the diagnosis would be something like vascular lesion. The alternatives include vascular lesion as a choice. So the answer should be vascular lesion. </think><answer> Final Answer:vascular lesion </answer>

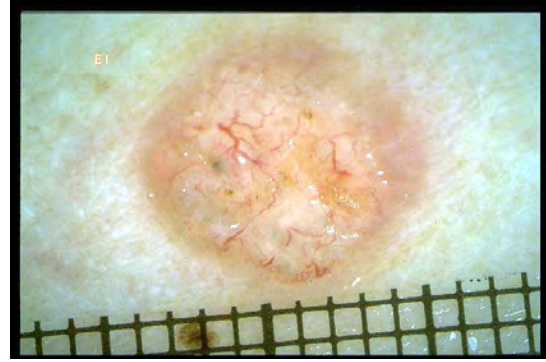

Case285: basal cell carcinoma

**SkinGPT-R1 Response:**

<think> Okay, let's see. The patient is a female with a nodular lesion on the back. The dermoscopy image shows arborizing vascular structures. The 7-point checklist has most points absent, except vascular structures. The image displays displays the lesion is raised with a reddish-pink color and irregular vascular patterns. The management is excision, and diagnostic difficulty is low. Basal cell carcinoma often presents as a nodular lesion with atypical vascular patterns, like arborizing vessels. Melanoma can have various types, but the absence of other features like pigment network, streaks, regression structures, etc., might point away from melanoma. Blue nevus and Clark nevus usually have different vascular patterns. Dermatofibroma is more of a pinkish, raised lesion but without the atypical vascular structures. Vascular lesion is a possibility, but the presence of nodularity and the context might make me lean towards basal cell carcinoma. Since the vascular structures are present and the other features are absent, the most likely diagnosis is basal cell carcinoma. </think><answer> Final Answer:basal cell carcinoma </answer>

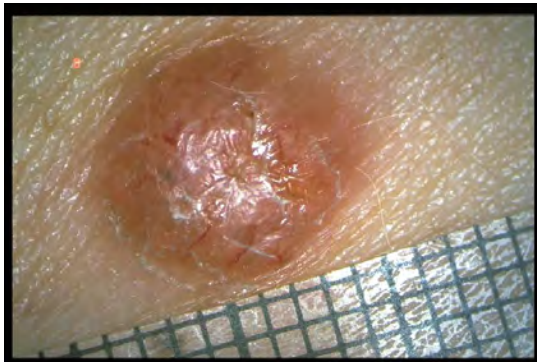

Case284: basal cell carcinoma

**SkinGPT-R1 Response:**

<think> Okay, let's see. The patient is a female with a nodular lesion on the back. The metadata shows that the dermoscopic 7-point checklist has most points absent, except for arborizing vascular structures. The image displays displays a raised, irregularly shaped lesion with a vascular pattern. The key here is the arborizing vascular structures. I remember that basal cell carcinoma often has a vascular pattern, sometimes showed as arborizing or telangiectasia. Melanomas can have various patterns, but the absence of other features like pigment network, streaks, regression structures, etc., might point away from melanoma. Since the diagnostic difficulty is low and the management is excision, it's likely a common lesion. Dermatofibroma is another possibility, but those are usually more fibrous and less vascular. The presence of arborizing vascular structures makes me lean towards basal cell carcinoma. So the answer should be basal cell carcinoma. </think><answer> Final Answer:basal cell carcinoma </answer>

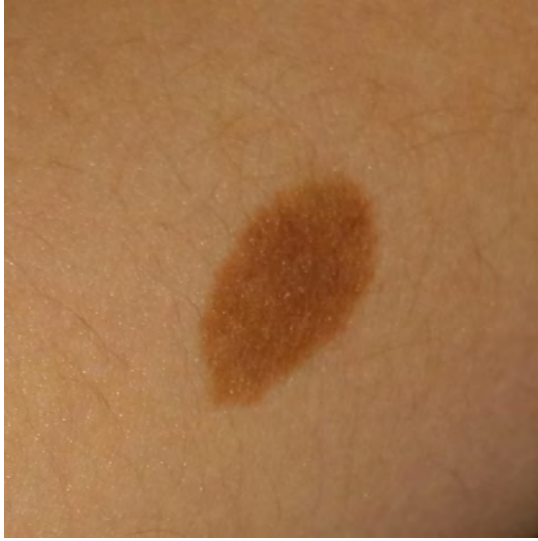

Case286: NEV

**SkinGPT-R1 Response:**

<think> Okay, let's see. The patient is an 8-year-old with a skin lesion on the arm. The image shows a brown, irregularly shaped patch. The key points here are that it's a child, the lesion is on the arm, and the image displays displays it's a common acquired nevus. The metadata also notes that there's no itching, pain, bleeding, or elevation. The lesion hasn't changed or grown. The differential diagnosis includes benign conditions like common acquired nevus (which is a type of mole) or maybe a seborrheic keratosis, but since the patient is a child, seborrheic keratosis is more common in older adults. The image displays displays it's a common acquired nevus, so that's a strong clue. The final diagnosis should be NEV. </think><answer> Final Answer:NEV </answer>

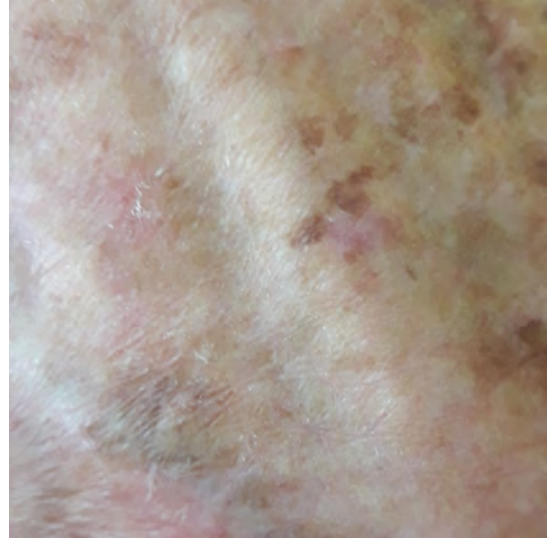

Case287: ACK

**SkinGPT-R1 Response:**

<think> Okay, let's see. The patient is a 75-year-old with a skin lesion on the hand. The image shows a slightly raised, irregularly shaped lesion with uneven coloration. They mention itching but no pain or bleeding. The lesion hasn't changed in size or shape. The key here is the location on the hand and the symptoms. The image displays displays it's consistent with actinic keratosis. Actinic keratosis is common in older individuals, especially those with a history of sun exposure. The patient has a history of skin cancer, which increases the risk of developing actinic keratosis. The differential diagnosis might include basal cell carcinoma (BCC) or squamous cell carcinoma (SCC), but since there's no mention of ulceration or other features, and the lesion is on the hand, actinic keratosis seems more likely. The final diagnosis should be ACK. </think><answer> Final Answer:ACK </answer>

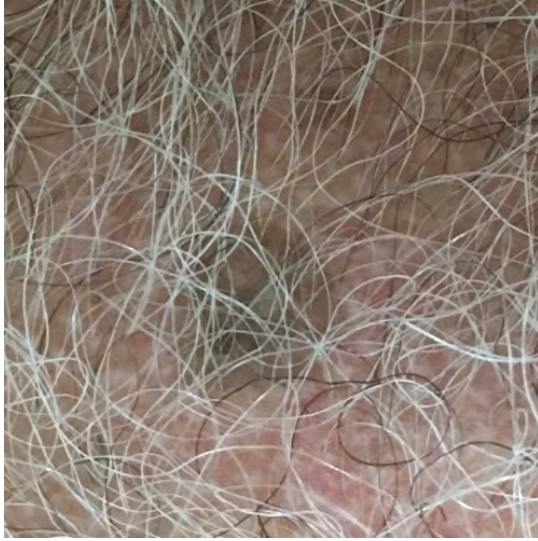

Case288: SEK

**SkinGPT-R1 Response:**

<think> Okay, let's see. The patient is a 53-year-old with a chest lesion. The image shows shows it's a raised, itchy lesion without pain or bleeding. The key points here are the elevation, itching, and lack of other symptoms. The image displays displays that the lesion is consistent with a seborrheic keratosis, which is common in older individuals and typically asymptomatic except for itching. The differential diagnosis might include actinic keratosis or basal cell carcinoma, but since there's no mention of crusting or bleeding for actinic keratosis, and the patient doesn't have a history of skin cancer, seborrheic keratosis seems more likely. The answer should be SEK. </think><answer> Final Answer:SEK </answer>

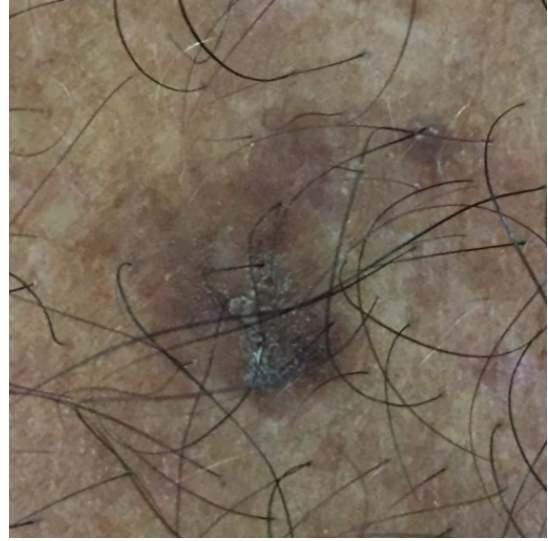

Case289: SEK

**SkinGPT-R1 Response:**

<think> Okay, let's see. The patient is a 66-year-old with a skin lesion on the forearm. The image shows a raised, scaly lesion with a slightly elevated center and reddish-pink borders. There's itching but no pain or bleeding. The lesion hasn't changed in size or shape. The metadata displays no personal history of skin cancer, and a biopsy wasn't done. First, the key features here are the scaly, raised lesion on the forearm. The itching is a clue. The image displays displays it's consistent with seborrheic keratosis (SEK). Seborrheic keratosis is common in older individuals, often appears as a raised, rough lesion with a keratin plug. The location on the forearm fits, and the lack of other symptoms like pain or bleeding supports that. The differential diagnosis could include actinic keratosis (AK), basal cell carcinoma (BCC), or squamous cell carcinoma (SCC). But given the scaly appearance and the fact that it's not showing any aggressive features, SEK is more likely. Since a biopsy wasn't done, but the clinical picture is typical, the diagnosis would be SEK. </think><answer> Final Answer:SEK </answer>

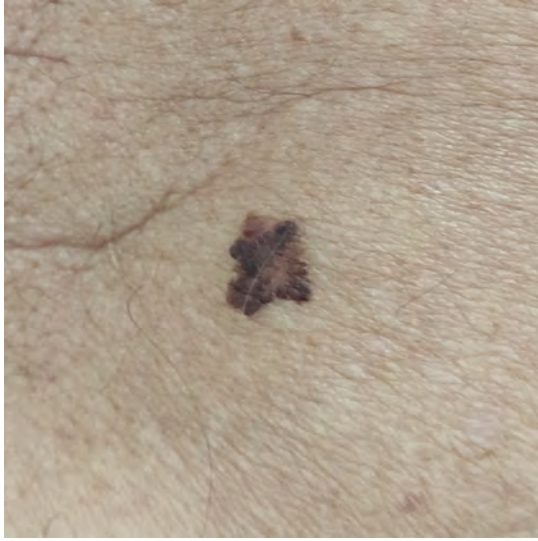

Case290: MEL

**SkinGPT-R1 Response:**

<think> Okay, let's see. The patient is a 78-year-old male with Fitzpatrick skin type 2, which is fair skin. The lesion is on the back, diameter 10.0 mm, elevated, grew and changed. Personal history includes skin cancer and other cancers. Biopsy was performed. The image shows a irregularly shaped, unevenly pigmented lesion with irregular borders. The key here is the diameter. Melanoma typically presents as a lesion larger than 6 mm, but sometimes it can be smaller. However, the fact that it's growing and changing, and the patient has a history of skin cancer, increases the concern. The image displays atypical pigmentation and irregular borders, which are classic signs of melanoma. The differential diagnosis might include basal cell carcinoma (BCC) or squamous cell carcinoma (SCC), but those are usually more locally aggressive and less likely to be as large without symptoms. Since the patient is a high-risk group due to previous cancers, melanoma is a strong possibility. The final label should be MEL. </think><answer> Final Answer:MEL </answer>

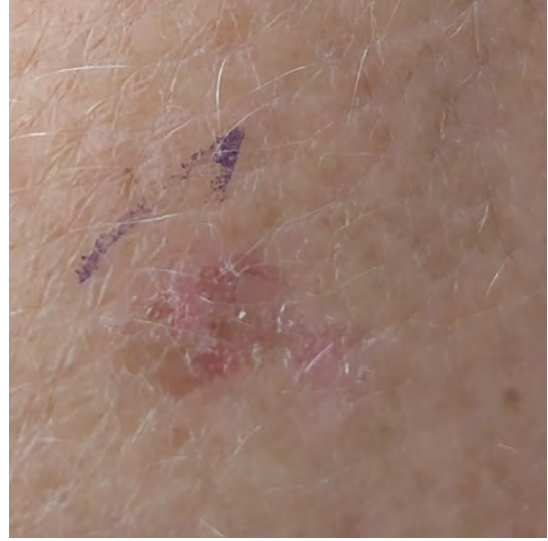

Case291: ACK

**SkinGPT-R1 Response:**

<think> Okay, let's see. The patient is 58 years old with a skin lesion on the forearm. The lesion is purple, slightly raised, and there's itching. The image displays displays it's a purple lesion on the forearm, which is common for actinic keratosis. Actinic keratosis often occurs on sun-exposed areas like the forearm, and they can be itchy. The color being purple might be due to the pigmentation in the lesion. Since there's no pain or bleeding, and it's not changing, it's probably not a malignancy like BCC or SCC. The differential diagnosis could include actinic keratosis, seborrheic keratosis, or maybe a vascular lesion. But given the age and location, actinic keratosis seems likely. The final diagnosis should be ACK. </think><answer> Final Answer:ACK </answer>

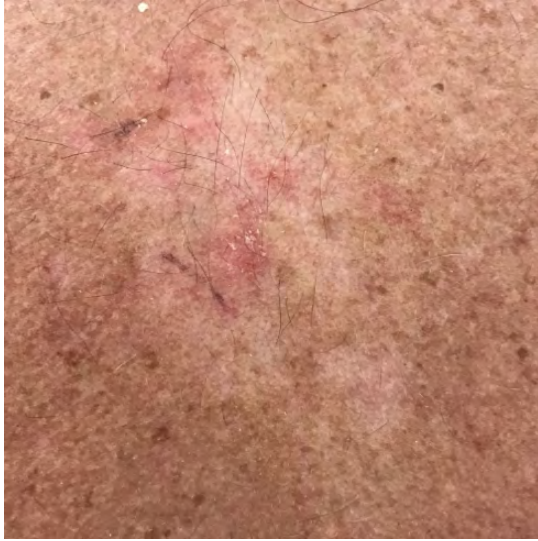

Case292: ACK

**SkinGPT-R1 Response:**

<think> Okay, let's see. The patient is a 63-year-old with a lesion on the back. The image shows a red, slightly raised area with some scaling and irregular borders. They mentioned itching but no pain or bleeding. The lesion has grown over time. The key here is the appearance: red, raised, scaling, irregular borders. The image also notes it's consistent with actinic keratosis. Actinic keratosis (AK) is a precancerous lesion, common in sun-exposed areas like the back. The patient has a history of skin cancer, which increases the risk of developing AK. The symptoms include itching, which aligns with AK. Since there's no mention of ulceration or other features that would suggest basal cell carcinoma (BCC) or squamous cell carcinoma (SCC), those are less likely. Melanoma (MEL) is ruled out because there's no mention of pigmentation or other melanoma features. The differential diagnosis might include other keratotic lesions, but AK is the most probable here. The final diagnosis should be AK. </think><answer> Final Answer:ACK </answer>

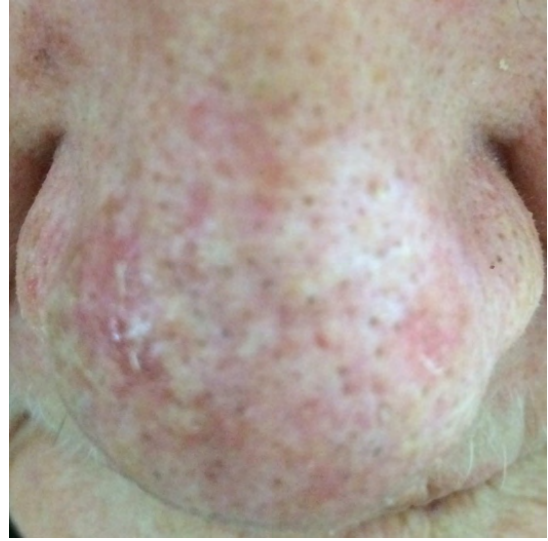

Case293: ACK

**SkinGPT-R1 Response:**

<think> Okay, let's see. The patient is an 80-year-old with a lesion on the nose. The image shows a red, inflamed area with small pustules and possibly some scarring. The metadata displays itching but no pain or bleeding. The lesion hasn't changed in size or appearance. The key here is the age of the patient and the characteristics of the lesion. The image displays displays actinic keratosis (AK) as a possibility. Actinic keratoses are common in older individuals, especially those with a history of sun exposure. The presence of pustules and possible scarring might make me think of other conditions, but since there's no mention of ulceration or other features, AK seems likely. The differential diagnosis could include basal cell carcinoma (BCC) or squamous cell carcinoma (SCC), but those are more concerning and usually have different characteristics, like ulceration or a different growth pattern. However, the patient's age and the fact that it's on the nose, a common site for AK, make me lean towards AK. Since a biopsy wasn't performed, but the clinical picture is consistent, the diagnosis is probably actinic keratosis. </think><answer> Final Answer:ACK </answer>

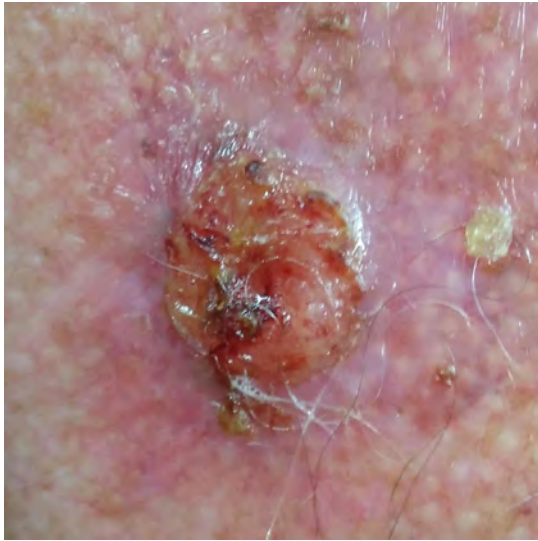

Case294: SCC

**SkinGPT-R1 Response:**

<think> Okay, let's see. The patient is a 70-year-old male with a lesion on the chest. The lesion is elevated, has a diameter of 18.0 x 13.0, and is growing. The image shows displays it's a raised, irregularly shaped lesion with a crusty surface. The key points here are the size, location, and the fact that it's growing. The patient doesn't have a history of skin cancer, but does have alcohol use. The metadata displays that a biopsy was performed. First, the primary diagnosis. The lesion is elevated and growing, which could be a few things. Since it's on the chest and the patient is an older male, maybe a seborrheic keratosis (SEK) comes to mind. SEKs are common in older individuals, often appear on the chest, are raised, and can be crusty. But wait, the image displays displays it's irregularly shaped. Seborrheic keratosis are usually more rounded or flat, not irregular. Alternatively, could it be a basal cell carcinoma (BCC)? BCCs can be raised and may have a pearly appearance, but they might have a different texture. The image displays displays crusty, which might be more consistent with a squamous cell carcinoma (SCC). SCCs can be crusty and sometimes have a reddish-pink color. But the patient doesn't have a history of skin cancer, which might make me think twice. However, the lesion is growing, which is a common feature of both BCC and SCC. The size is 18x13, which is relatively large. Seborrheic keratosis can be large, but the fact that it's growing might lean towards a malignancy. The patient's alcohol use could be a risk factor for SCC, but not for BCC. But since the lesion is growing and the patient has alcohol use, which is a risk factor for SCC, and the appearance is more consistent with a carcinoma, the final diagnosis is likely SCC. </think><answer> Final Answer:SCC </answer>

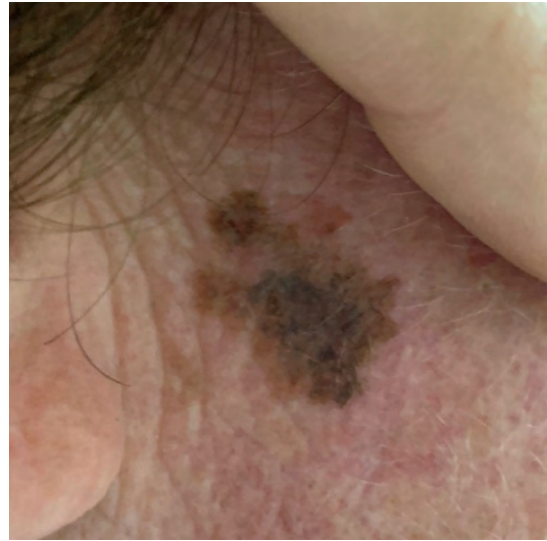

Case295: MEL

**SkinGPT-R1 Response:**

<think> Okay, let's see. The patient is a 46-year-old female with a skin lesion on the face. The lesion is irregular in shape, asymmetrical, and has varying shades of brown. The diameter is 12.0 x 5.0 mm. There's itching, and it's grown and changed over time. The metadata displays no personal history of skin cancer, but a family background in Pomerania. Biopsy was performed. Fitzpatrick skin type 3.0. First, the key points here are the irregular shape, asymmetry, multiple colors, and growth over time. Those are classic signs of melanoma. The location on the face and the patient's age (middle-aged) also increase the risk of melanoma. The itching is a symptom that might be associated with melanoma, especially if it's a larger lesion. The fact that it's been growing and changing supports melanoma. The differential diagnosis could include other cancers like BCC or SCC, but those are usually more raised or have different symptoms. Since there's itching and it's been changing, melanoma is more likely. The family history in Pomerania might be a red herring, but the main clues point to melanoma. So the primary diagnosis is melanoma. The final label should be MEL. </think><answer> Final Answer:MEL </answer>

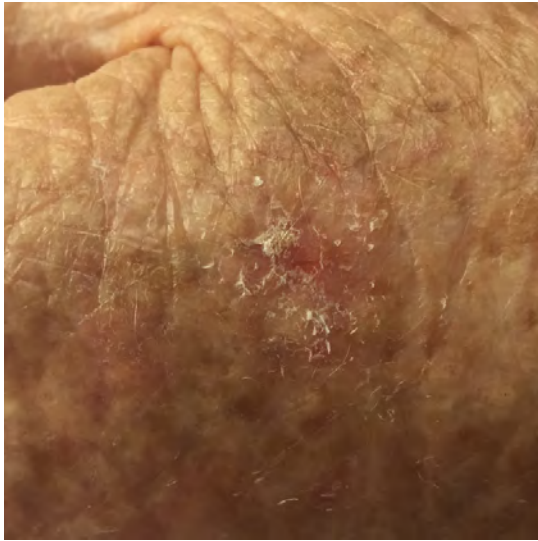

Case296: ACK

**SkinGPT-R1 Response:**

<think> Okay, let's see. The patient is a 75-year-old with a skin lesion on the hand. The image shows a scaly, erythematous patch with some crust and scaling. The key points here are the location (hand), the appearance (scaly, erythematous), and the symptoms (itching). The metadata displays no pain, bleeding, or elevation, and no growth or change. The patient has a history of skin cancer, but the lesion itself doesn't show any features of a malignancy like BCC or SCC. Since it's on the hand and has scaling, maybe something like psoriasis? But psoriasis usually has a different pattern, maybe plaques with silvery scales. Wait, but the image displays displays it's a patch with crust and scaling. Alternatively, could it be a seborrheic keratosis? But seborrheic keratosis are usually raised and warty, not scaly. Or maybe actinic keratosis? Actinic keratosis can be scaly and found on sun-exposed areas like the hand. But the patient's skin type isn't known, so that's a guess. Wait, the Fitzpatrick skin type is unknown, so maybe that's a factor. But the lesion is on the hand, which is a common site for actinic keratosis in sun-exposed individuals. However, the patient has a history of skin cancer, so maybe a recurrence? But the lesion doesn't show features of a malignancy. Alternatively, could it be a fungal infection like tinea cruris, but that's usually on the lower body. Or maybe contact dermatitis, but the symptoms are itching. The image displays displays no signs of infection, so maybe not. The differential diagnosis could include actinic keratosis, psoriasis, seborrheic keratosis, or maybe a benign nevus. But since the patient has a history of skin cancer, maybe a premalignant lesion. Actinic keratosis is a precancerous lesion that can develop into squamous cell carcinoma. But the lesion here doesn't show any features of a malignancy. Alternatively, could it be a chronic dermatitis? But the symptoms are itching, and the lesion is scaly. The key is that the lesion is on the hand and has scaling. Actinic keratosis is a common lesion in elderly individuals with sun-exposed areas. Since the patient is 75, that fits. The presence of scaling and crusty appearance might be consistent with actinic keratosis. The fact that it's not raised or painful rules out other possibilities. So the primary diagnosis is actinic keratosis. The differential diagnosis would be psoriasis, seborrheic keratosis, or maybe a benign nevus. But given the location and the patient's age, actinic keratosis is the most likely. The final diagnosis should be ACK, which stands for actinic keratosis. </think><answer> Final Answer:ACK </answer>

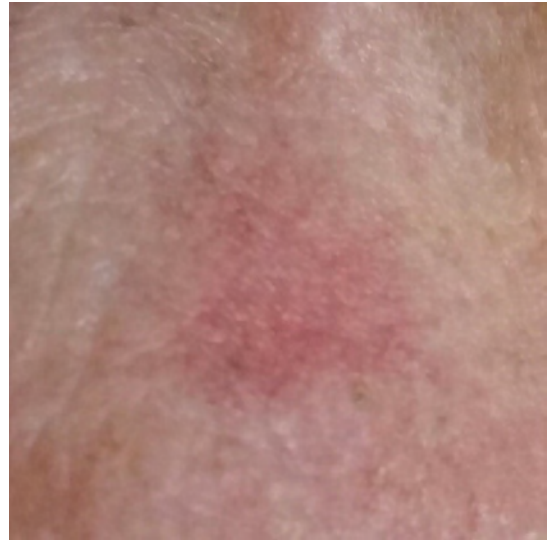

Case297: ACK

**SkinGPT-R1 Response:**

<think> Okay, let's see. The patient is 66 years old with a facial lesion. The image shows a pink, slightly raised area that's been there a while. No symptoms like itching or pain. The image displays displays it's consistent with actinic keratosis. Actinic keratosis is a precancerous lesion, common in sun-exposed areas. The patient has a history of skin cancer, which increases the risk of developing actinic keratosis. Since there's no mention of other features like ulceration or thickening, which might suggest something else like basal cell carcinoma (BCC) or squamous cell carcinoma (SCC), and the lesion is just a small, raised patch. The differential diagnosis could include BCC or SCC, but given the age and location, actinic keratosis seems more likely. The final diagnosis should be ACK. </think><answer> Final Answer:ACK </answer>

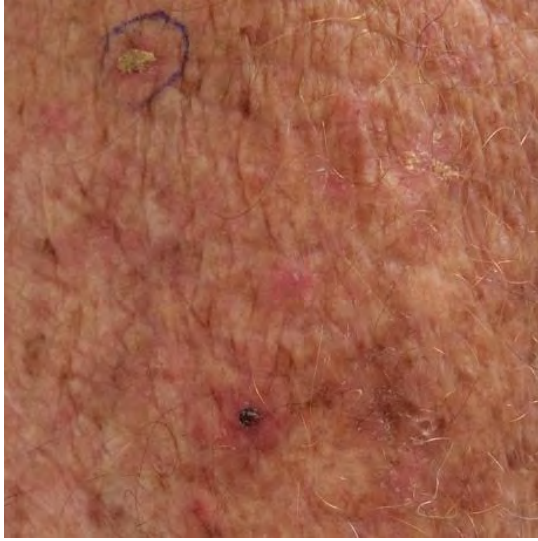

Case298: ACK

**SkinGPT-R1 Response:**

<think> Okay, let's see. The patient is an 87-year-old male with Fitzpatrick skin type 2, which is fair skin. The lesion is on the forearm, diameter 10.0 mm. Symptoms include itching and bleeding, but no pain. It's elevated and hasn't changed or grown. No personal history of skin cancer, but there's a history of pesticide exposure. The image shows multiple small papules and plaques, some with a slightly elevated, reddish appearance. The key here is the presence of actinic keratoses. Actinic keratoses are precancerous lesions that develop on sun-exposed areas, which makes sense with the pesticide exposure and fair skin. The symptoms like itching and bleeding align with actinic keratoses. The differential diagnosis might include basal cell carcinoma (BCC) or squamous cell carcinoma (SCC), but given the age and the fact that there's no history of skin cancer, and the lesion is multiple and actinic, actinic keratoses seem more likely. The final label should be ACK. </think><answer> Final Answer:ACK </answer>

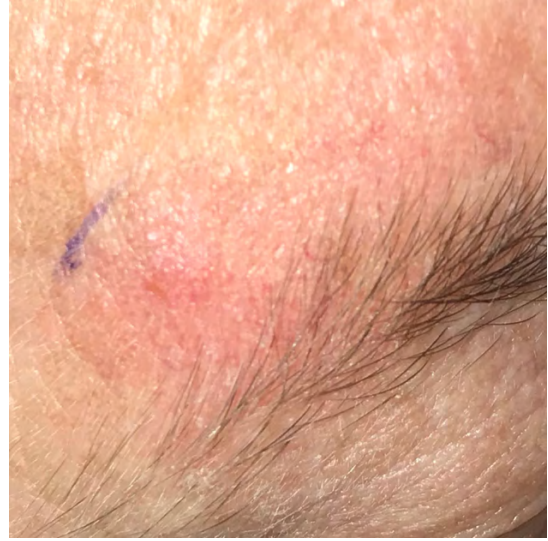

Case299: ACK

**SkinGPT-R1 Response:**

<think> Okay, let's see. The patient is 58 years old with a facial lesion. The image shows a red, slightly raised area with some scaling. They mentioned it's been growing and changing. The symptoms include itching, but no pain or bleeding. The lesion is on the face, and there's a history of skin cancer. The image displays displays it's consistent with actinic keratosis. Actinic keratosis (AK) is a precancerous lesion, common in sun-exposed areas. The key points here are the location (face), the symptoms (itching), and the history of skin cancer. The differential diagnosis might include basal cell carcinoma (BCC) or squamous cell carcinoma (SCC), but given the age and the fact that it's a precancerous lesion, AK makes more sense. Since a biopsy wasn't done, but the clinical picture is consistent, the diagnosis is likely AK. The final label should be ACK, which stands for actinic keratosis. </think><answer> Final Answer:ACK </answer>

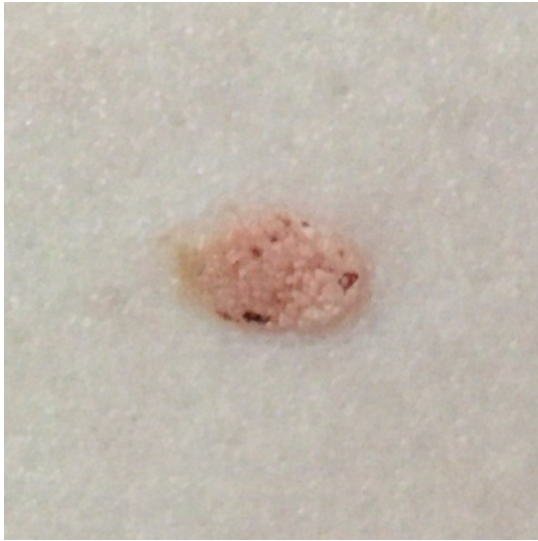

Case300: SEK

**SkinGPT-R1 Response:**

<think> Okay, let's see. The patient is a 46-year-old with a skin lesion on the abdomen. The lesion is elevated, pinkish, with a slightly irregular border. They mentioned itching but no pain or bleeding. The diameter isn't clear, but it's been stable. The key here is the appearance: elevated, pink, irregular border. The image shows displays it's consistent with a seborrheic keratosis. Seborrheic keratosis (SEK) is a common benign lesion, usually asymptomatic, with a warty or horn-like projection. The symptoms here are itching, which SEK can sometimes cause. Since there's no mention of other features like ulceration or pigment changes that might suggest melanoma (MEL), and the diameter isn't a factor here. The differential might include actinic keratosis (ACK) or basal cell carcinoma (BCC), but the image doesn't mention any ulceration or specific BCC features. The final diagnosis should be SEK. </think><answer> Final Answer:SEK </answer>

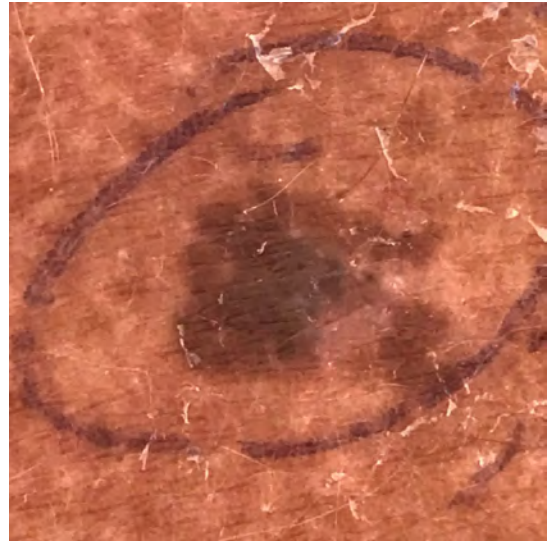

Case301: MEL

**SkinGPT-R1 Response:**

<think> Okay, let's see. The patient is a 58-year-old male with a lesion on the back. The lesion is irregular in shape with irregular borders and varying shades of brown. The diameter is 14.0 x 11.0 mm. The metadata shows that the lesion has changed over time. The patient has a history of other cancer but no skin cancer. Exposure to pesticides is noted. The biopsy was performed. First, the key clinical cues here are the irregular borders, varying shades of brown, and changes over time. The patient's age and the location on the back are also important. The presence of other cancer history might be a red flag, but since it's not skin cancer, maybe it's another type. Pesticide exposure could be a risk factor for certain cancers, like melanoma. The lesion's appearance is consistent with melanoma, which often has irregular borders and varying shades. The fact that it's changed over time supports that. The differential diagnosis could include basal cell carcinoma (BCC), squamous cell carcinoma (SCC), actinic keratosis (ACK), seborrheic keratosis (SEK), or melanoma (MEL). Given the patient's age and the location, melanoma is a possibility. The other cancer history might be a distractor, but the lesion's features point more towards melanoma. So the primary diagnosis is melanoma. The final label should be MEL. </think><answer> Final Answer:MEL </answer>

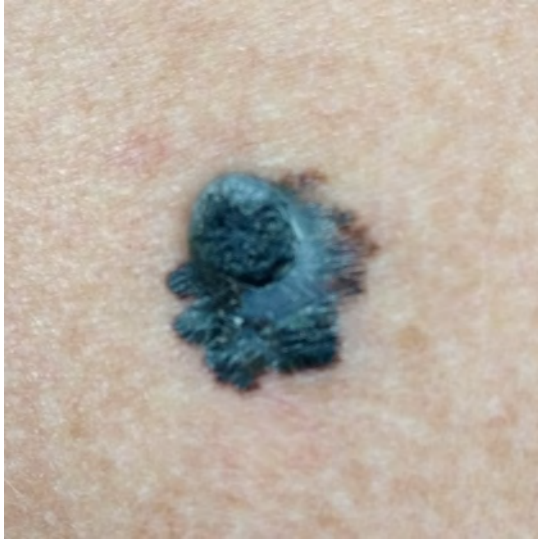

Case302: MEL

**SkinGPT-R1 Response:**

<think> Okay, let's see. The patient is a 54-year-old female with a lesion on the back. The lesion is irregular in shape, has a diameter of 14.0 and 12.0, which is pretty large. It's elevated and itchy, with some irregular borders and a possible central depression. The image displays displays atypical pigmentation and asymmetry. The metadata shows a history of alcohol use but no skin cancer. The lesion has grown and changed over time. Biopsy was performed. Fitzpatrick skin type 4, which is fair to medium. Differential diagnosis needs to be considered. BCC (Basal Cell Carcinoma) is a possibility, but the image displays displays the texture and color are more consistent with melanoma. Melanoma often has irregular borders, asymmetry, and atypical pigmentation. The patient's age and the location on the back are factors; melanoma is more common in older individuals, especially on sun-exposed areas. However, the patient's alcohol use might be a risk factor for other cancers, but the lesion's features point more towards melanoma. The presence of itching and the growth over time also align with melanoma. The final diagnosis should be melanoma. </think><answer> Final Answer:MEL </answer>

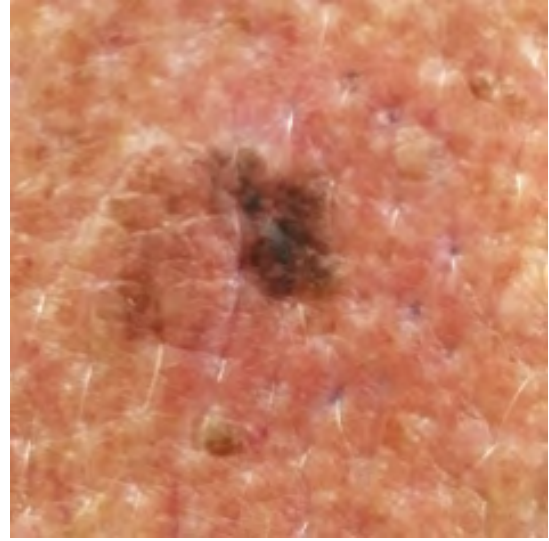

Case303: MEL

**SkinGPT-R1 Response:**

<think> Okay, let's see. The patient is a 70-year-old male with a lesion on the back. The lesion is 10x8 mm, elevated, and has changed over time. The image shows displays it's a dark brownish lesion with irregular borders and asymmetry. The key here is the risk factors. The patient has a history of other cancers but no skin cancer. The lesion is growing and changing, which are important clues. The image displays displays it's consistent with a melanoma. But wait, the differential diagnosis should include other possibilities. Let me think. BCC (Basal Cell Carcinoma) is common in older individuals, but usually presents as a pearly or flesh-colored lesion, not necessarily dark. SCC (Squamous Cell Carcinoma) can be red and scaly, but again, the color and location might differ. AK (Actinic Keratosis) is usually rough and red, not a dark lesion. SEK (Seborrheic Keratosis) is typically warty and hyperpigmented, but the image displays displays it's a lesion, not a keratosis. The main point here is the risk of melanoma. The patient's Fitzpatrick skin type is 2.0, which is fair, but age and location on the back increase the risk. The lesion's features of irregular borders, asymmetry, and changing over time are classic for melanoma. The biopsy was performed, but the image doesn't mention the histology, so we have to rely on clinical features. Since the primary diagnosis is melanoma, the differential should consider other melanoma variants or other cancers. But the question asks for the most likely diagnosis based on the given info. The answer should be MEL. </think><answer> Final Answer:MEL </answer>

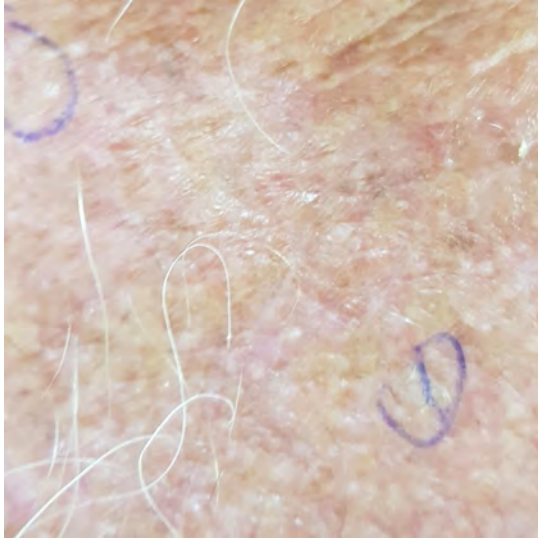

Case304: ACK

**SkinGPT-R1 Response:**

<think> Okay, let's see. The patient is a 69-year-old with a skin lesion on the chest. The image shows a slightly raised, irregularly shaped lesion with a slightly elevated border. There's some scaling and a purpleish tint. The symptoms include itching, but no pain or bleeding. The lesion hasn't changed in size or appearance recently. Fitzpatrick skin type isn't known, but the lesion is on the chest, which is a common site for certain cancers. The key here is the appearance: irregular shape, elevated border, scaling, and a purpleish tint. The image mentioned that these features are consistent with actinic keratosis (AK). Actinic keratoses are precancerous lesions that develop on sun-exposed areas, and they can sometimes progress to squamous cell carcinoma (SCC). However, the patient doesn't have a history of skin cancer, and the lesion hasn't changed much. The presence of itching without other symptoms like pain or bleeding might be typical for AK. The purpleish tint could be due to hyperpigmentation or inflammation. Since the biopsy wasn't performed, we have to rely on clinical features. The differential diagnosis might include seborrheic keratosis (SEK), which is also common on the chest and can be raised, but SEK usually has a more warty appearance and isn't typically purple. Basal cell carcinoma (BCC) might have a different texture, maybe more pearly or translucent. Melanoma (MEL) would have different features like irregular borders, varied pigmentation, or asymmetry, which aren't mentioned here. Given the information, the most likely diagnosis is actinic keratosis. The final label should be ACK. </think><answer> Final Answer:ACK </answer>

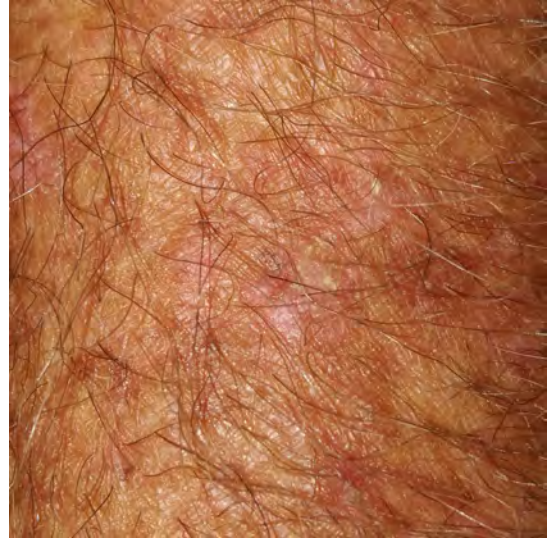

Case305: ACK

**SkinGPT-R1 Response:**

<think> Okay, let's see. The patient is a 68-year-old with a skin lesion on the forearm. The image shows a red, slightly raised area with some scaling. The key points here are the color (red), texture (slightly raised, scaling), and location (forearm). The symptoms mentioned are itching, but no pain or bleeding. The lesion hasn't changed in size or appearance recently. Fitzpatrick skin type isn't known, but the image displays displays it's consistent with actinic keratosis. Actinic keratosis (AK) is a precancerous lesion, common in sun-exposed areas like the forearm. The differential diagnosis might include basal cell carcinoma (BCC) or squamous cell carcinoma (SCC), but since there's no mention of ulceration or other features typical of those, and the patient has a history of skin cancer, but the lesion itself doesn't show those characteristics. The scaling and redness align more with AK. The final diagnosis should be AK. </think><answer> Final Answer:ACK </answer>

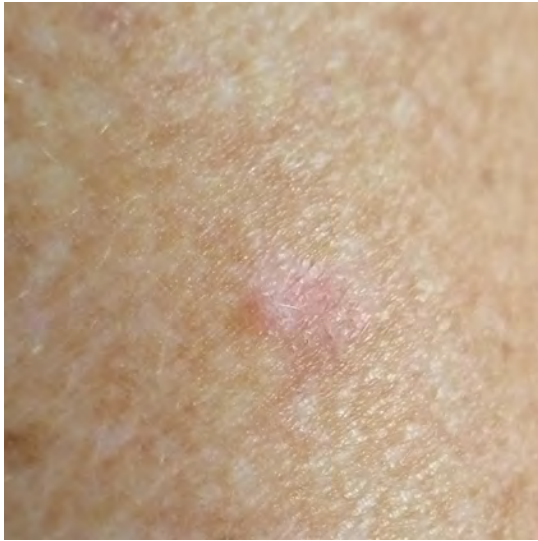

Case306: ACK

**SkinGPT-R1 Response:**

<think> Okay, let's see. The patient is a 57-year-old female with Fitzpatrick skin type 3. The lesion is on the forearm, diameter 15.0 and 5.0. No symptoms like itching, pain, bleeding, or elevation. No evolution noted. Personal history includes skin cancer, but no other cancer. Exposure to pesticides. Biopsy not done. Visual image shows a pinkish, slightly raised lesion with a slightly elevated, irregular border. The key here is the history of skin cancer and the location on the forearm. The lesion is raised and has an irregular border. Fitzpatrick 3 suggests medium skin tone, which is more prone to actinic keratoses. Actinic keratoses (AK) are precancerous lesions that often occur in sun-exposed areas like the forearm. The image displays displays it's a premalignant lesion, which aligns with AK. The differential diagnosis could include basal cell carcinoma (BCC) or squamous cell carcinoma (SCC), but given the patient's history of skin cancer and the location, AK is more likely. Since the biopsy wasn't done, but the clinical features point towards AK, the diagnosis would be AK. The final label is ACK, which stands for Actinic Keratosis. </think><answer> Final Answer:ACK </answer>

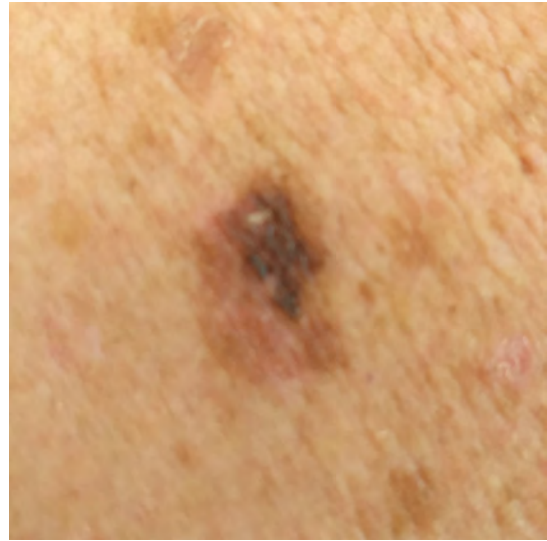

Case307: MEL

**SkinGPT-R1 Response:**

<think> Okay, let's see. The patient is a 65-year-old female with Fitzpatrick skin type 2. The lesion is on the arm, diameter 15x10 mm. Biopsy was performed. The image shows displays it's a dark brown, irregularly shaped lesion with irregular borders and varying shades. No symptoms like itching or pain. Personal history no skin cancer. The key here is the appearance: irregular borders, varying shades, diameter. The image displays displays it's concerning for melanoma. But wait, the patient is 65, which is an older age, and melanoma is more common in older individuals. However, the lesion's characteristics—like irregular borders and varying shades—are classic signs of melanoma. But wait, the differential diagnosis might include other things. Let me think. BCC (Basal Cell Carcinoma) usually has a pearly appearance, sometimes with an ulcerated center. SCC (Squamous Cell Carcinoma) might be more erythematous and tend to be thicker. AK (Actinic Keratosis) is usually a rough, scaly patch. SEK (Seborrheic Keratosis) is warty and usually not as irregular. The image displays displays it's a lesion, not a plaque, so maybe not SEK. The biopsy was performed, but the image is based on the image. The key is the features mentioned: irregular borders, varying shades, large diameter. Melanoma can present in older individuals. The fact that it's on the arm, which is a common site for melanoma in some populations. The absence of symptoms like itching or pain doesn't rule it out. The personal history of no skin cancer might be reassuring, but the lesion itself is the main factor. The differential diagnosis could include melanoma, but since the image displays displays it's concerning for melanoma, and the patient's age and location are consistent, the primary diagnosis is likely melanoma. The final label would be MEL. </think><answer> Final Answer:MEL </answer>

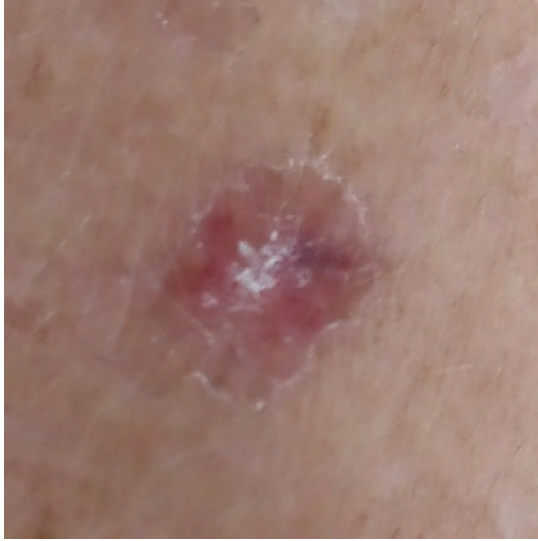

Case308: ACK

**SkinGPT-R1 Response:**

<think> Okay, let's see. The patient is a 54-year-old with a lesion on the forearm. The lesion is elevated, reddish-pink, with a slightly raised, irregular border and a central area that's a bit lighter. They mentioned itching but no pain or bleeding. The image displays displays it's consistent with a actinic keratosis (AK), which is a precancerous lesion. The key points here are the location (forearm, which is an exposed area), the color (reddish-pink), and the texture (scaly, slightly raised). Actinic keratosis often develops on sun-exposed areas and can have a rough, scaly surface. The differential diagnosis might include basal cell carcinoma (BCC) or squamous cell carcinoma (SCC), but those are usually more firm and might have a different appearance. Since there's no mention of ulceration or a more aggressive look, AK seems more likely. The patient has a history of skin cancer, so they might be at higher risk, but the lesion itself is showed as actinic keratosis. The final diagnosis should be AK. </think><answer> Final Answer:ACK </answer>

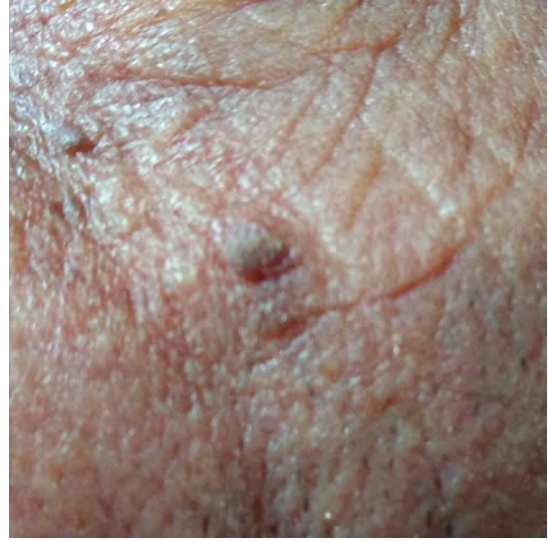

Case309: SEK

**SkinGPT-R1 Response:**

<think> Okay, let's see. The patient is 82 years old with a facial lesion. The image shows a raised, slightly erythematous area with a central depression. The key points here are the elevation and the central depression. The image displays displays it's consistent with a seborrheic keratosis. Seborrheic keratosis (SK) are common in older individuals, appear as raised lesions with a warty texture, often have a horn-like projection, and can have a central depression. The patient doesn't have any symptoms like itching or pain, which is typical for SK. The differential diagnosis might include actinic keratosis (AK), basal cell carcinoma (BCC), or squamous cell carcinoma (SCC). But given the age and the appearance, SK is more likely. Since the biopsy wasn't performed, but the clinical features point towards SK, the diagnosis would be seborrheic keratosis. </think><answer> Final Answer:SEK </answer>

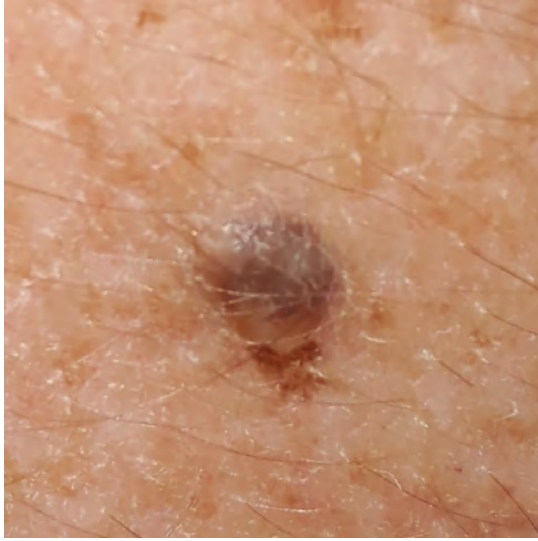

Case310: NEV

**SkinGPT-R1 Response:**

<think> Okay, let's see. The patient is a 39-year-old with a lesion on the forearm. The lesion is elevated, has a slightly raised border, and a central depression. It's been growing but hasn't changed in appearance. The image displays displays it's consistent with a compound nevus. The metadata shows no itching, pain, or bleeding, which rules out things like melanoma or other cancers. Since a biopsy wasn't done, but the clinical features point towards a benign lesion. The differential diagnosis would include other nevi types, but given the features, the most likely is a compound nevus. So the final diagnosis should be NEV. </think><answer> Final Answer:NEV </answer>

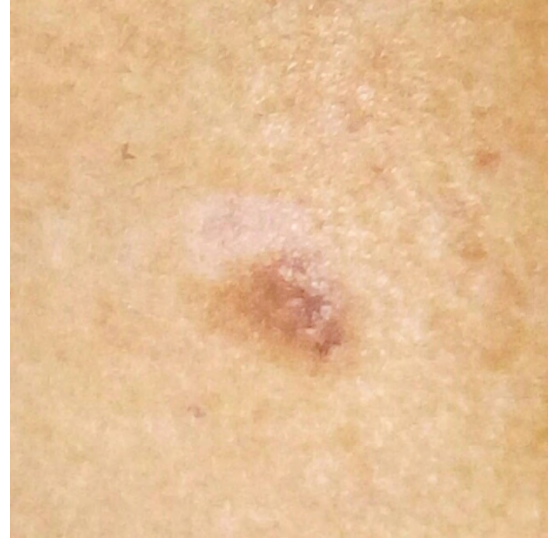

Case311: MEL

**SkinGPT-R1 Response:**

<think> Okay, let's see. The patient is a 58-year-old female with Fitzpatrick skin type 2, which is fair skin. The lesion is on the arm, diameter 9.0 x 4.0 mm. It's elevated, has changed over time, and the patient has a history of skin cancer. The image shows displays it's a raised, irregularly shaped lesion with a slightly elevated center and irregular borders. They mentioned it's concerning for a malignant lesion. The differential diagnosis includes basal cell carcinoma (BCC), squamous cell carcinoma (SCC), actinic keratosis (ACK), seborrheic keratosis (SEK), melanoma (MEL), or seborrheic keratosis (NEV). But the key here is the history of skin cancer and the features of the lesion. Since it's a raised lesion with irregular borders and growth over time, melanoma comes to mind because that's a common malignant lesion. But wait, the patient has a history of skin cancer. Could it be a recurrence? Or maybe another type? But the image displays displays it's concerning for a malignant lesion. The differential includes BCC and SCC. BCC is usually more waxy, sometimes with a pearly appearance, but the image here displays irregular borders and growth, which might be more consistent with melanoma. However, the patient's history of skin cancer might make me consider a recurrence, but the lesion's appearance is important. The diameter is 9 mm, which is relatively large for a seborrheic keratosis, which are typically smaller. Actinic keratosis is usually thinner and more scaly. The fact that it's on the arm, a common site for actinic keratosis, but the lesion is elevated and changing, which points more towards melanoma. But the patient has a history of skin cancer, so could it be a melanoma in situ or an invasive melanoma? The image displays displays it's a raised, irregularly shaped lesion with a slightly elevated center and irregular borders. Melanoma often presents with irregular borders, asymmetry, irregular pigmentation, and growth over time. The diameter is 9 mm, which is larger than typical actinic keratosis. Seborrheic keratosis can be raised but usually has a more uniform appearance. BCC is typically pearly and may have a central depression, but the image here doesn't mention that. The presence of a history of skin cancer might increase the likelihood of a melanoma, especially if the lesion is growing and changing. However, without seeing the image, it's challenging. But based on the given information, the most likely diagnosis is melanoma. The differential diagnosis includes BCC and SCC, but the features mentioned (elevated, irregular borders, growth) are more consistent with melanoma. The patient's history of skin cancer might be a risk factor, but the lesion's appearance is the primary clue. Therefore, the final diagnosis is melanoma. </think><answer> Final Answer:MEL </answer>

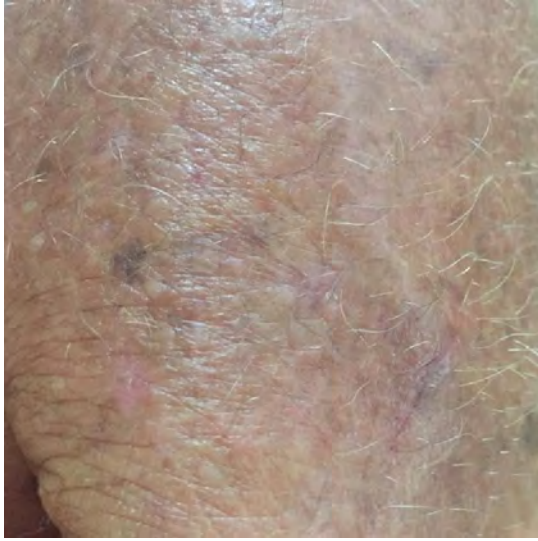

Case312: ACK

**SkinGPT-R1 Response:**

<think> Okay, let's see. The patient is a 40-year-old with a lesion on the hand. The image shows a scaly, reddish patch with some irregular borders and texture. The key points here are the scaling and the location on the hand. The metadata displays no symptoms like itching or pain, and the lesion hasn't changed in size or appearance. The patient has a history of skin cancer, which is a risk factor. So, the main things to consider are the appearance of the lesion and the patient's risk factors. Scaling and reddish color might point towards something like psoriasis or eczema, but those are more common on the arms or legs, not the hand. However, the location is the hand, which is a common site for actinic keratosis (AK), especially in someone with a history of sun exposure. Actinic keratosis is precursor to squamous cell carcinoma (SCC), but the image displays there's no elevation or other features of malignancy. The lesion is showed as a patch, not a raised lesion. The patient's age is 40, which is within the typical range for AK. Since a biopsy wasn't performed, but the clinical features are consistent with AK, and the patient has a skin cancer history, the most likely diagnosis is actinic keratosis. The differential diagnosis could include seborrheic keratosis (SEK) or basal cell carcinoma (BCC), but SEK is usually more warty and BCC is more of a nodule. However, the image displays no elevation, so maybe not BCC or SEK. The key here is the scaling and the location. Actinic keratosis is a common finding on sun-exposed areas like the hands. So the primary diagnosis is actinic keratosis. The final label should be ACK. </think><answer> Final Answer:ACK </answer>

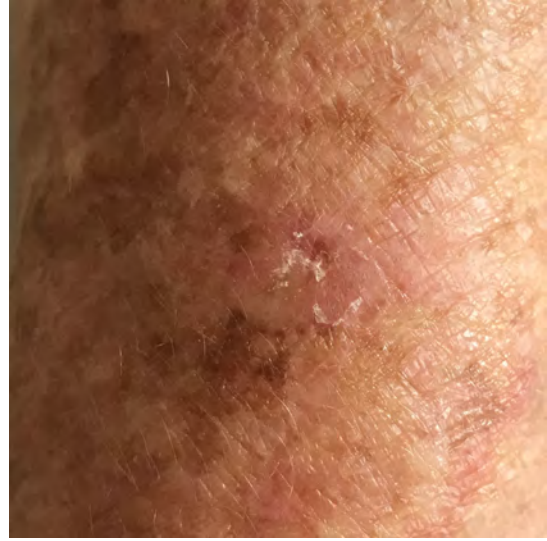

Case313: ACK

**SkinGPT-R1 Response:**

<think> Okay, let's see. The patient is a 77-year-old with a lesion on the forearm. The lesion is elevated and itchy but not painful or bleeding. The image shows shows it's a scaly, raised area with a slightly reddened border. The key points here are the symptoms: itching and elevation, no pain or bleeding. The lesion hasn't changed in size or shape. The metadata displays no personal history of skin cancer, but the patient is 77, which is an age group where actinic keratosis (AK) is more common. Actinic keratosis is typically a precancerous lesion that appears as a scaly, raised patch, often on sun-exposed areas like the forearm. The lack of pain or bleeding rules out something like basal cell carcinoma (BCC) or squamous cell carcinoma (SCC), which can be more aggressive and might cause pain or bleeding. Since there's no mention of ulceration or other features of BCC or SCC, and the lesion is stable, actinic keratosis seems likely. The differential diagnosis could include seborrheic keratosis (SEK) or maybe a benign nevus (NEV), but given the context of actinic damage and the patient's age, AK is more probable. The final diagnosis should be AK. </think><answer> Final Answer:ACK </answer>

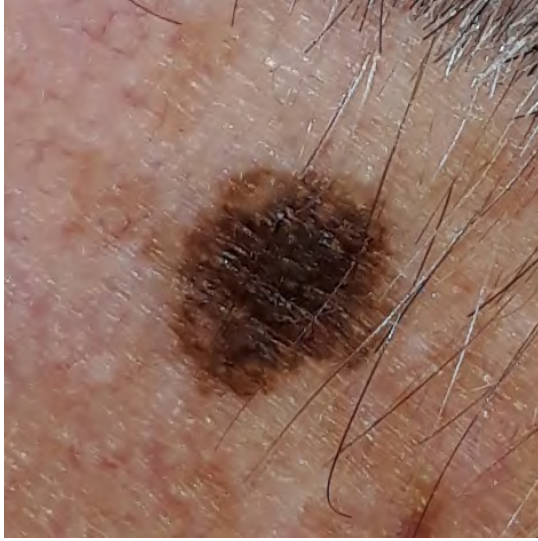

Case314: MEL

**SkinGPT-R1 Response:**

<think> Okay, let's see. The patient is a 82-year-old male with Fitzpatrick skin type 2.0, which is fair skin. The lesion is on the ear, diameter 6.0 mm. It's been growing and changing. No symptoms like itching or pain. Personal history shows he's a smoker and has a history of other cancers, but no skin cancer. Lifestyle includes alcohol use and pesticide exposure. Biopsy was performed. The image shows a dark, irregularly shaped lesion with irregular borders and varying shades. The key here is the age, location, and the features of the lesion. Since it's on the ear, which is a common site for melanoma. The lesion is large (6 mm), growing, and has irregular borders. Melanoma often presents with irregular borders, varying shades, and can grow. The fact that it's a older male with fair skin (Fitzpatrick 2) increases the risk of melanoma. The absence of symptoms like itching or pain doesn't rule it out. The personal history of other cancers might indicate a higher risk of melanoma. The biopsy was performed, so the diagnosis is based on that. Differential diagnosis could be basal cell carcinoma (BCC) or squamous cell carcinoma (SCC), but those are usually more locally aggressive and less likely to be on the ear in an older patient with no history of skin cancer. Actinic keratosis (ACK) or seborrheic keratosis (SEK) are less likely because they don't typically grow or change. So the most likely diagnosis is melanoma. </think><answer> Final Answer:MEL </answer>

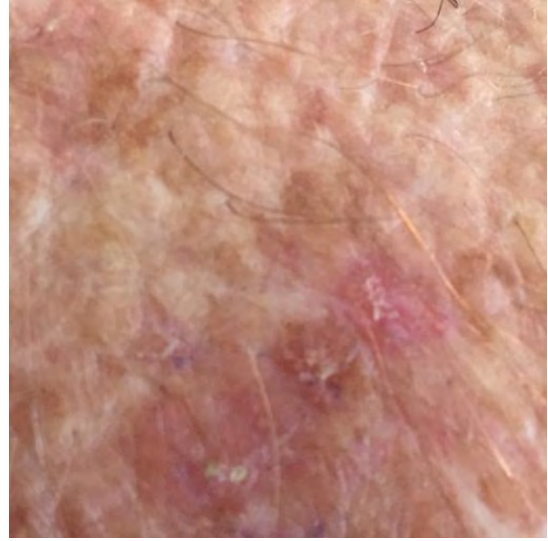

Case315: ACK

**SkinGPT-R1 Response:**

<think> Okay, let's see. The patient is a 63-year-old with a lesion on the forearm. The image shows a slightly elevated, reddish-pink area with some scaling and irregular borders. They mentioned itching but no pain or bleeding. The lesion hasn't changed in size or shape. The key here is the appearance: reddish-pink, scaling, irregular borders. The image also notes it's consistent with actinic keratosis. Actinic keratosis (AK) is a precancerous lesion, common in sun-exposed areas like the forearm. The patient has a history of skin cancer, which increases the risk of developing AK. Since there's no mention of ulceration or other features that might point to basal cell carcinoma (BCC) or squamous cell carcinoma (SCC), and the symptoms are just itching without other signs, AK seems likely. The differential diagnosis could include other precancers or early cancers, but given the info, AK is the primary diagnosis. </think><answer> Final Answer:ACK </answer>

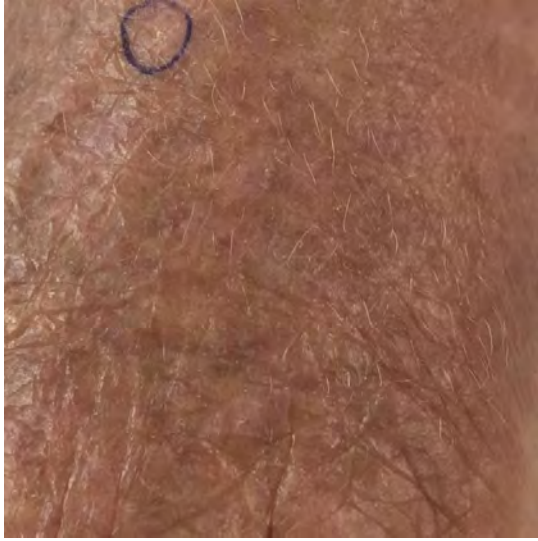

Case316: ACK

**SkinGPT-R1 Response:**

<think> Okay, let's see. The patient is a 55-year-old with a skin lesion on the hand. The image shows a small, raised, slightly scaly lesion. They mentioned itching but no pain or bleeding. The lesion hasn't changed in size or appearance. The key here is the location on the hand, which is a common site for actinic keratoses. Actinic keratoses are precancerous lesions that develop on sun-exposed areas. The scaly texture and slight elevation fit with that. The fact that it's been there a while without changing supports it being a chronic condition like actinic keratosis. The differential diagnosis could include basal cell carcinoma (BCC) or squamous cell carcinoma (SCC), but those are usually more aggressive and might have different characteristics. Since there's no mention of ulceration or other features, actinic keratosis seems more likely. The final label should be ACK. </think><answer> Final Answer:ACK </answer>

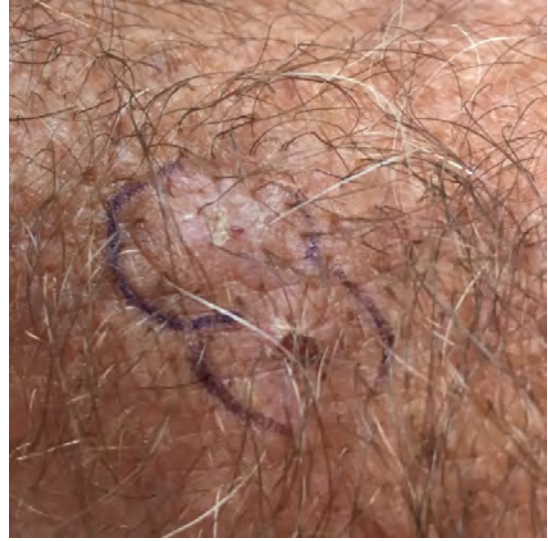

Case317: ACK

**SkinGPT-R1 Response:**

<think> Okay, let's see. The patient is a 64-year-old with a lesion on the forearm. The lesion is raised, itches, and bled. The image shows it's a scaly, reddish patch with a slightly raised border. The key here is the symptoms: itching, bleeding, and the appearance. The image displays displays it's consistent with actinic keratosis. Actinic keratosis (AK) is a precancerous lesion, common in sun-exposed areas like the forearm. The symptoms like itching and bleeding fit with AK. The differential diagnosis might include basal cell carcinoma (BCC) or squamous cell carcinoma (SCC), but those are usually more firm and might have different symptoms. Since the lesion is scaly and the patient has a history of sun exposure (even though skin type is unknown), AK seems likely. The fact that it's been stable without growth or change also points to AK. Biopsy not done, but the clinical picture is strong. So the diagnosis is actinic keratosis. </think><answer> Final Answer:ACK </answer>

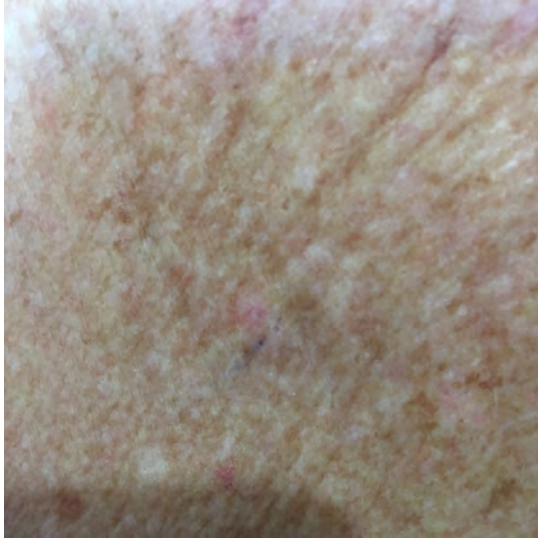

Case318: ACK

**SkinGPT-R1 Response:**

<think> Okay, let's see. The patient is a 50-year-old with a skin lesion on the chest. The image shows a slightly elevated, reddish patch with a slightly raised border. No symptoms like itching or pain. The texture is rough, and there's minimal scaling. The lesion is stable, not changing in size or appearance. Fitzpatrick skin type isn't known, but the lesion is on the chest, which is a common site for certain conditions. The key here is the appearance: reddish patch, slightly raised border, rough texture, minimal scaling. The image displays displays it's consistent with actinic keratosis. Actinic keratosis (AK) is a precancerous lesion, often found on sun-exposed areas like the chest. The patient has a history of sun exposure, even though that's not specified here. Since there's no mention of other symptoms or risk factors like a family history of skin cancer, and the lesion is stable, AK seems likely. The differential diagnosis could include seborrheic keratosis (SEK) or actinic keratosis. But given the context, AK is more probable. The final diagnosis should be AK, which is labeled as ACK. </think><answer> Final Answer:ACK </answer>

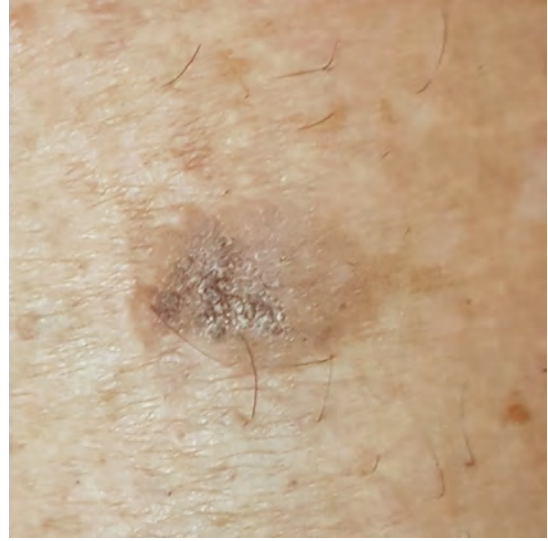

Case319: SEK

**SkinGPT-R1 Response:**

<think> Okay, let's see. The patient is a 74-year-old female with a lesion on the thigh. The lesion is 6.0 mm in diameter, elevated, and there's no itching, pain, or bleeding. The image shows displays it's a raised, slightly scaly area with a slightly elevated center and a slightly depressed perimeter. The key here is the appearance. The image displays displays it's consistent with a seborrheic keratosis. Seborrheic keratosis (SEK) are common in older individuals, often appear on sun-exposed areas but can be on the thigh. They are usually raised, have a slightly rough or scaly surface, and can have a slightly elevated center with a depressed perimeter. The patient doesn't have a history of skin cancer, but does have other cancer history. However, the lesion's appearance points more towards SEK. The differential diagnosis could include actinic keratosis (AK), basal cell carcinoma (BCC), or squamous cell carcinoma (SCC). But given the age, location, and the image, SEK seems more likely. BCC and SCC are more common in sun-exposed areas, and the patient's Fitzpatrick skin type is 3.0, which is fair to medium, but not necessarily high risk for these. Since a biopsy wasn't performed, the diagnosis is based on clinical features. So the primary diagnosis is SEK. </think><answer> Final Answer:SEK </answer>

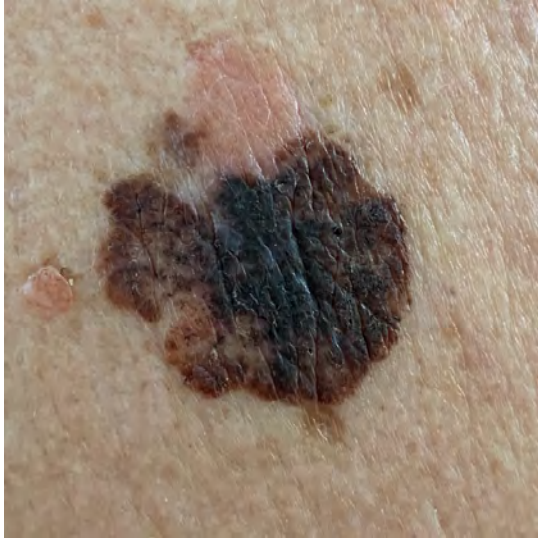

Case320: MEL

**SkinGPT-R1 Response:**

<think> Okay, let's see. The patient is a 71-year-old female with a lesion on the back. The lesion is irregular in shape, asymmetrical, has varying shades of brown, and is growing. The diameter is about 20mm. She has a history of skin cancer and other cancers. The image shows displays it's concerning for melanoma. The key points here are the asymmetry, irregular borders, varying shades, and growth. Melanoma often presents with those features. The differential might include other cancers, but given the context of skin cancer history, melanoma is the most likely. The final label should be MEL. </think><answer> Final Answer:MEL </answer>

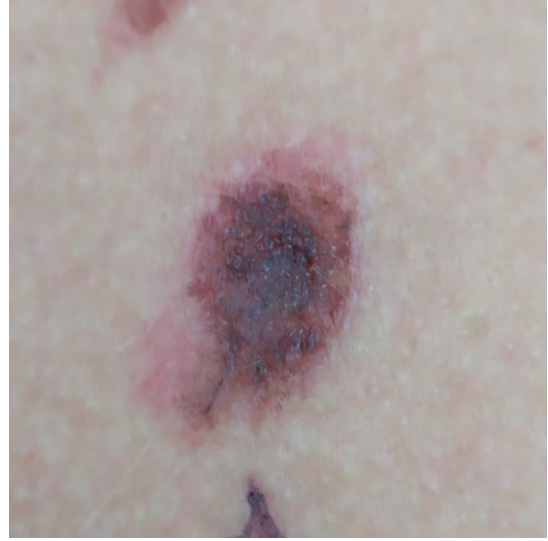

Case321: MEL

**SkinGPT-R1 Response:**

<think> Okay, let's see. The patient is a 21-year-old male with Fitzpatrick skin type 2, which is fair skin. The lesion is on the back, diameter 20x10 mm. It's been growing but hasn't changed in appearance. The metadata shows a history of skin cancer, so he's at higher risk. The lesion is raised, pigmented, with an irregular border and uneven color. Biopsy was performed. First, the key points here are the location (back), size, growth, and the fact that it's a pigmented lesion. The image displays displays an atypical mole, but since it's growing, that might be a concern. The presence of a personal history of skin cancer increases the risk of melanoma. The lesion's features—irregular border, uneven color, and growth—align with melanoma. However, the differential diagnosis should include other possibilities. Basal cell carcinoma (BCC) is less likely in a young patient with such features. Squamous cell carcinoma (SCC) can be aggressive but might have different presentation. Atypical keratosis (ACK) and seborrheic keratosis (SEK) are benign, but the growth and pigmentation make them less likely. Melanoma (MEL) fits the image best. The final label should be MEL. </think><answer> Final Answer:MEL </answer>

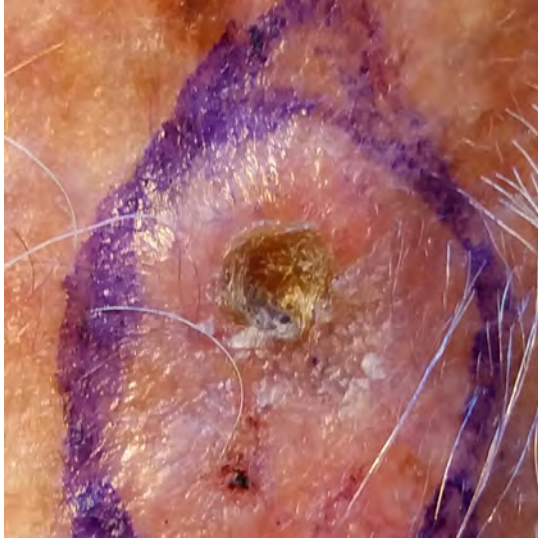

Case322: SCC

**SkinGPT-R1 Response:**

<think> Okay, let's see. The patient is a 82-year-old male with a lesion on the face. The lesion is 8.0 x 5.0 mm, elevated, and has symptoms like itching, pain, and bleeding. The image shows displays it's a raised, irregularly shaped lesion with a crusty surface. The metadata shows a history of other cancer but no skin cancer. Exposure to pesticides is noted. Biopsy was performed. The key here is the appearance: elevated, crusty, with symptoms. The image displays displays it's consistent with a keratinizing squamous cell carcinoma (SCC). The differential includes basal cell carcinoma (BCC), actinic keratosis (ACK), seborrheic keratosis (SEK), melanoma (MEL), and common nevus (NEV). But the primary diagnosis given the features is SCC. The final label should be SCC. </think><answer> Final Answer:SCC </answer>

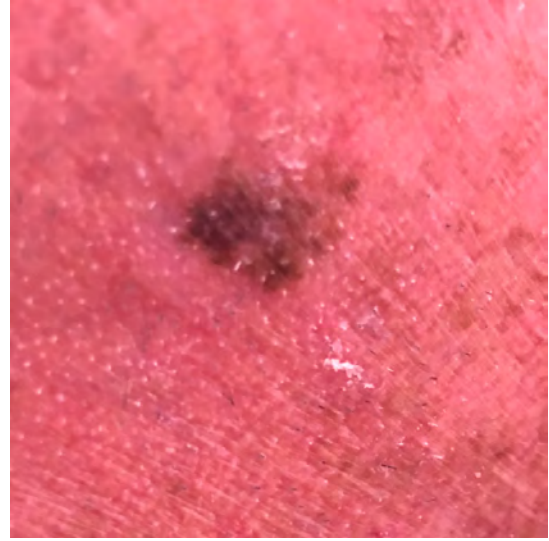

Case323: SEK

**SkinGPT-R1 Response:**

<think> Okay, let's see. The patient is a 75-year-old with a skin lesion on the face. The image shows a small, dark spot that's slightly raised. The key points here are the color (dark), location (face), and the fact that it's a small, raised lesion. The metadata displays no symptoms like itching or pain, and no history of skin cancer. The lesion hasn't changed or grown. The image displays displays it's consistent with a seborrheic keratosis. Seborrheic keratosis (SK) are common in older individuals, appear as raised, warty lesions, often pigmented. Since there's no history of skin cancer and the lesion hasn't changed, SK seems likely. The differential could include actinic keratosis or basal cell carcinoma, but given the age and location, SK is more probable. The final diagnosis should be SEK. </think><answer> Final Answer:SEK </answer>

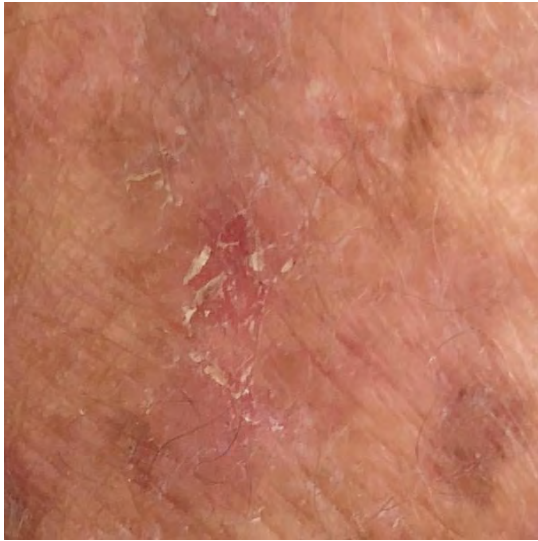

Case324: ACK

**SkinGPT-R1 Response:**

<think> Okay, let's see. The patient is a 78-year-old female with Fitzpatrick skin type 3. The lesion is on the forearm, diameter 11.0 x 6.0. Symptoms are itching, no pain, bleeding, or elevation. No history of skin cancer, but has other cancer history. Biopsy not done. Visual image shows a scaly, reddish patch with some erosion and scaling. The key here is the appearance: scaly, reddish, possibly a chronic lesion. The patient is older, so actinic keratosis comes to mind. Actinic keratoses are common in sun-exposed areas like the forearm, especially in older individuals with fair skin. The symptoms of itching fit with AK. The differential could include seborrheic keratosis, but those are usually more keratotic and warty, not scaly. Basal cell carcinoma (BCC) or squamous cell carcinoma (SCC) are possibilities, but the image shows displays no elevation or ulceration, which might be seen in those. Since there's no history of skin cancer, and the lesion is chronic with scaling, actinic keratosis seems most likely. The final label should be ACK. </think><answer> Final Answer:ACK </answer>

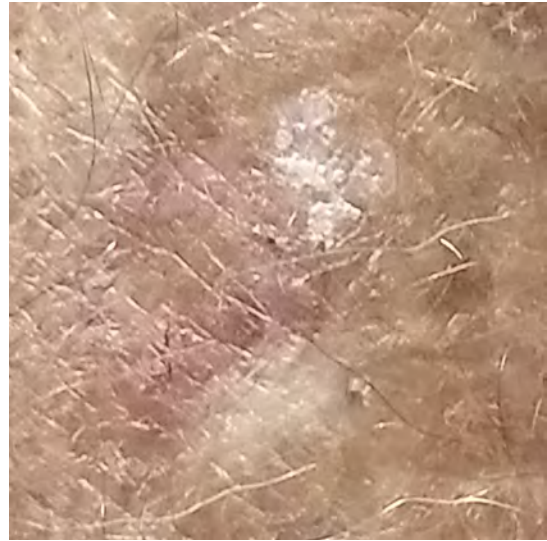

Case325: ACK

**SkinGPT-R1 Response:**

<think> Okay, let's see. The patient is a 60-year-old with a skin lesion on the forearm. The image shows a small, raised, slightly scaly lesion. The symptoms include itching, but no pain or bleeding. The lesion hasn't changed in size or appearance. The metadata displays no personal history of skin cancer, and a biopsy wasn't done. The key here is the appearance: small, raised, scaly. Scaly lesions can be indicative of several things. Since it's on the forearm and the patient is an older adult, maybe actinic keratosis comes to mind. Actinic keratoses are precancerous lesions that develop on sun-exposed areas, and they can be scaly and raised. Another possibility is seborrheic keratosis, which is also a common benign lesion, often found on the face or trunk, but the location here is the forearm. However, seborrheic keratosis can have a slightly warty appearance. But the image displays displays scaly, which might lean more towards actinic keratosis. Basal cell carcinoma (BCC) and squamous cell carcinoma (SCC) are possibilities, but those are usually more erythematous or ulcerated, and the patient doesn't have any symptoms like pain or bleeding. Since the lesion is small and scaly, BCC and SCC might be less likely. Melanoma is ruled out because there's no mention of pigmentation or other melanoma features. The differential diagnosis might include actinic keratosis, seborrheic keratosis, or maybe a benign nevus. But given the scaly appearance and the location on the forearm, actinic keratosis seems more likely. However, without a biopsy, it's a clinical diagnosis. The final label should be actinic keratosis, which is ACK. </think><answer> Final Answer:ACK </answer>

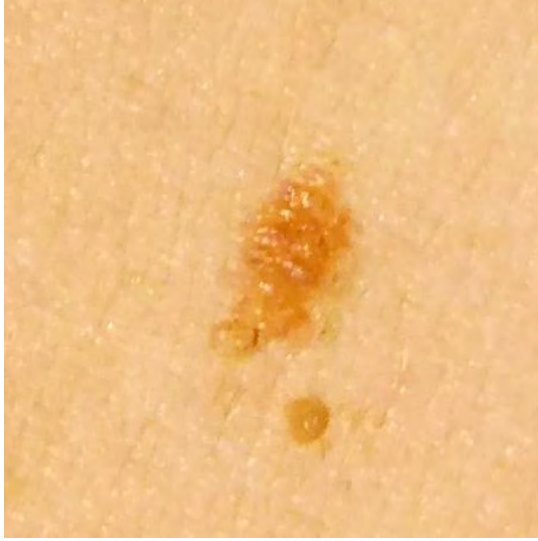

Case326: NEV

**SkinGPT-R1 Response:**

<think> Okay, let's see. The patient is 31 years old with a lesion on the back. The lesion is elevated and has a rough, uneven surface. It's been growing but hasn't changed in appearance. The image displays it's a compound nevus, which is a type of benign mole. The key here is that it's a nevus, so the primary diagnosis would be a nevus. The differential diagnosis might include other types of lesions, but since the metadata displays it's a compound nevus, the final diagnosis should be NEV. </think><answer> Final Answer:NEV </answer>

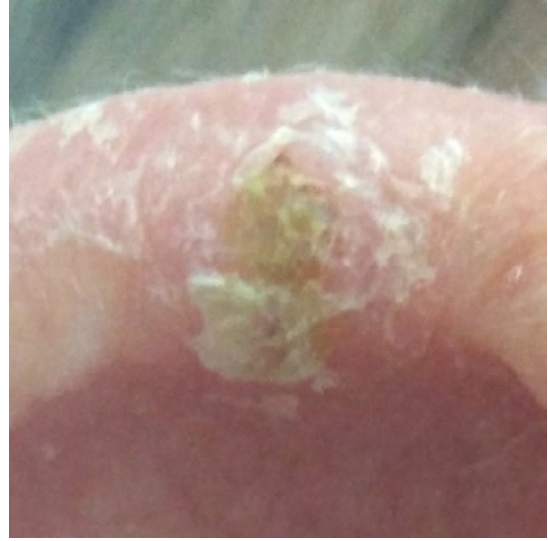

Case327: ACK

**SkinGPT-R1 Response:**

<think> Okay, let's see. The patient is a 76-year-old male with a skin lesion on the ear. The lesion is 5.0 x 3.0 mm, slightly raised, and has a crusty appearance. There's itching but no pain or bleeding. The metadata displays a history of alcohol use and pesticide exposure. The biopsy was performed. Fitzpatrick skin type 2.0, which is fair skin. The lesion hasn't changed in size or appearance. Personal history shows no skin cancer, but family background is German. The key here is the crusty, slightly raised lesion on the ear with itching. The image displays it's consistent with actinic keratosis. Actinic keratosis (AK) is a precancerous lesion, common in fair-skinned individuals exposed to sun. The patient's alcohol use and pesticide exposure might be risk factors, but the main clue is the clinical appearance and location. Since it's a biopsy-confirmed lesion, and the features match AK, the diagnosis is likely AK. The differential might include seborrheic keratosis or basal cell carcinoma, but given the location (ear) and the crusty appearance, AK seems more likely. The final label should be ACK, which is actinic keratosis. </think><answer> Final Answer:ACK </answer>

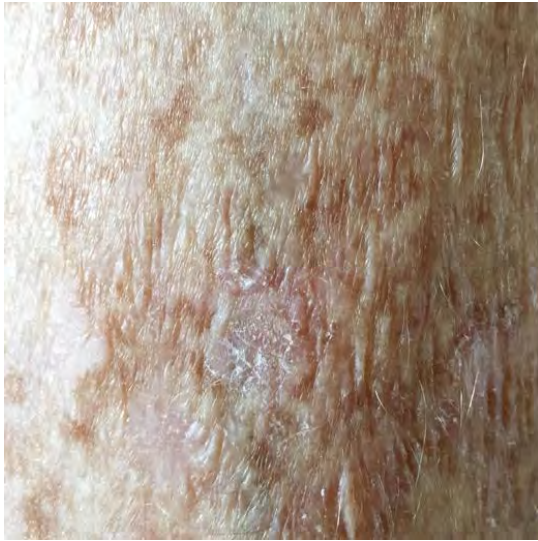

Case328: ACK

**SkinGPT-R1 Response:**

<think> Okay, let's see. The patient is a 72-year-old with a skin lesion on the forearm. The image shows a scaly, erythematous patch with some hyperpigmentation. The key points here are the scaling and hyperpigmentation. The symptoms mentioned are itching, but no pain or bleeding. The lesion hasn't changed in size or appearance recently. The patient has a history of skin cancer, so we need to consider that in the differential. First, the primary diagnosis. The image displays displays scaling and hyperpigmentation. Melanoma (MEL) can present with those features, but the patient has a history of skin cancer. However, the lesion hasn't changed, and there's no mention of other typical melanoma features like irregular borders or varied pigmentation. Alternatively, actinic keratosis (AK) is a precancerous lesion that often presents as a scaly patch, especially on sun-exposed areas like the forearm. Actinic keratosis can be associated with chronic sun damage, which this patient might have. The itching could be a symptom of actinic keratosis. Another possibility is seborrheic keratosis (SEK), which is a common benign lesion that can be scaly and may itch. But seborrheic keratosis usually has a more elevated, warty appearance, not necessarily a flat patch. Since the lesion is depicted as a flat, scaly patch, seborrheic keratosis might be less likely. Basal cell carcinoma (BCC) and squamous cell carcinoma (SCC) are more concerning. BCC often presents as a flesh-colored or pinkish lesion with a waxy appearance, sometimes with a pearly edge. SCC can be red, scaly, and sometimes ulcerated. However, the image doesn't mention ulceration or a raised, nodular appearance. The lesion here is a flat, scaly patch, which doesn't fit BCC or SCC as much. Given the patient's age and the location on the forearm, actinic keratosis (AK) seems plausible. The scaling and hyperpigmentation are common in AK, especially in sun-damaged skin. The itching is a common symptom of actinic keratosis. The fact that it hasn't changed in size or appearance supports the idea of a benign lesion like AK. The history of skin cancer might make the clinician more cautious, but without any signs of malignancy, the primary diagnosis is likely AK. The differential diagnosis would include other possibilities, but the most likely is actinic keratosis. The final diagnosis should be AK. </think><answer> Final Answer:ACK </answer>

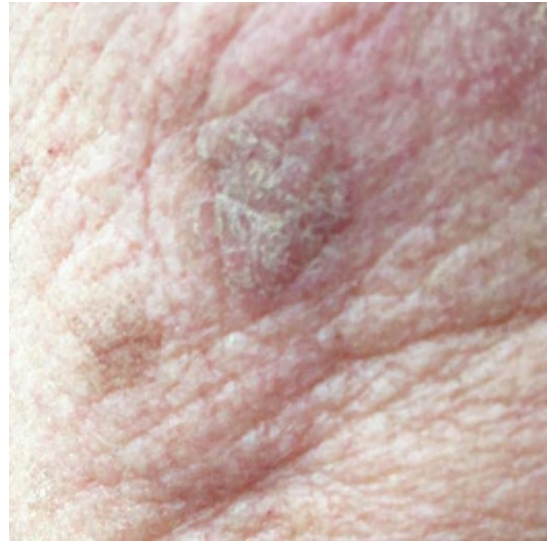

Case329: ACK

**SkinGPT-R1 Response:**

<think> Okay, let's see. The patient is 71 years old with a skin lesion on the face. The image shows a small, flat, pinkish area with a slightly raised border. No symptoms like itching or pain, and it's been stable. The key here is the appearance: flat, pinkish, slightly raised border. The image mentioned it's consistent with actinic keratosis. Actinic keratosis (AK) is a precancerous lesion, common in sun-exposed areas. The patient has a history of skin cancer, which increases the risk of developing AK. Since there's no elevation or other symptoms, and the lesion is stable, AK seems likely. The differential diagnosis could include seborrheic keratosis (SEK) or basal cell carcinoma (BCC), but the flat appearance and location on the face (which is a common site for AK) point more towards AK. The final diagnosis should be AK, which is labeled as ACK. </think><answer> Final Answer:ACK </answer>

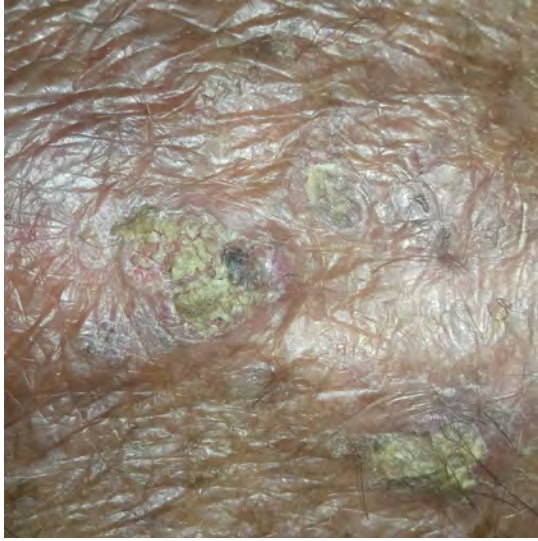

Case330: ACK

**SkinGPT-R1 Response:**

<think> Okay, let's see. The patient is a 69-year-old male with a lesion on his hand. The lesion is 5.0 x 3.0 mm, elevated, itches, and has a crusty appearance. He has a history of skin cancer and other cancers. The image shows a raised, crusty lesion on the hand, which is common in actinic keratoses. Actinic keratoses are precancerous lesions that develop on sun-exposed areas, and they can be itchy. The patient's Fitzpatrick skin type is 2.0, which is fair skin, so sun damage would be a factor. The presence of a crusty appearance and itching aligns with actinic keratoses. The differential diagnosis might include basal cell carcinoma (BCC) or squamous cell carcinoma (SCC), but given the location on the hand and the patient's history, actinic keratoses (ACK) seem more likely. Since a biopsy wasn't performed, but the clinical features point towards ACK, the final diagnosis would be ACK. </think><answer> Final Answer:ACK </answer>

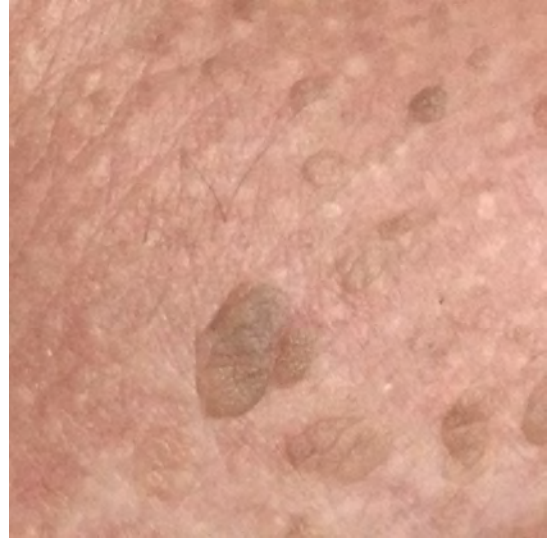

Case331: SEK

**SkinGPT-R1 Response:**

<think> Okay, let's see. The patient is a 63-year-old with a lesion on the chest. The image shows displays it's a raised, oval-shaped lesion with a slightly irregular border. The key points here are that it's elevated, has an irregular border, and the patient has a history of skin cancer. The metadata displays there's no itching, pain, or bleeding, and it hasn't changed in size or appearance. The differential diagnosis needs to be considered. First, the primary diagnosis. The lesion is raised and has an irregular border. The patient has a history of skin cancer, so maybe a recurrence? But the image displays displays it's not a typical basal cell carcinoma (BCC) or squamous cell carcinoma (SCC) because those usually have different features. BCCs are often pearly or waxy, and SCCs can be red and scaly. The lesion here is oval and raised, but not the typical BCC or SCC features. Alternatively, it could be an actinic keratosis (AK), which is a precancerous lesion. AKs are usually rough and scaly, but the image displays displays it's oval and raised, which might not fit. Another possibility is seborrheic keratosis (SEK), which is a common benign lesion. SEKs are usually raised with a distinct base and can have a warty appearance. The image displays displays an irregular border, which might be a clue for SEK. However, the patient has a history of skin cancer, so maybe it's a pigmented lesion. Melanoma (MEL) is a possibility, but the image doesn't mention any pigmentation. The lesion is showed as having an irregular border, which is a common feature of melanoma. But the patient's age and location on the chest might be factors. However, the metadata displays that the lesion hasn't changed, and there's no bleeding or pain. Melanoma can present without those symptoms, but the lack of pigmentation might make it less likely. Wait, the image displays displays the lesion is not a typical BCC or SCC. So maybe it's something else. The differential diagnosis could include seborrheic keratosis, actinic keratosis, or perhaps a pigmented lesion. But since the patient has a history of skin cancer, maybe it's a recurrence. However, the image doesn't mention any features of a recurrence, like ulceration or a different texture. The key here is the irregular border and elevation. Seborrheic keratosis can have an irregular border, but the image displays displays it's oval and raised. Actinic keratosis is usually on sun-exposed areas and can be rough and scaly. The location is the chest, which is not a typical site for AK. The patient's age is 63, which is a risk factor for developing skin cancer, but the lesion itself doesn't show typical features of BCC or SCC. The differential diagnosis would include actinic keratosis, but the location is the chest, which is less common for AK. So the primary diagnosis is SEK. </think><answer> Final Answer:SEK </answer>

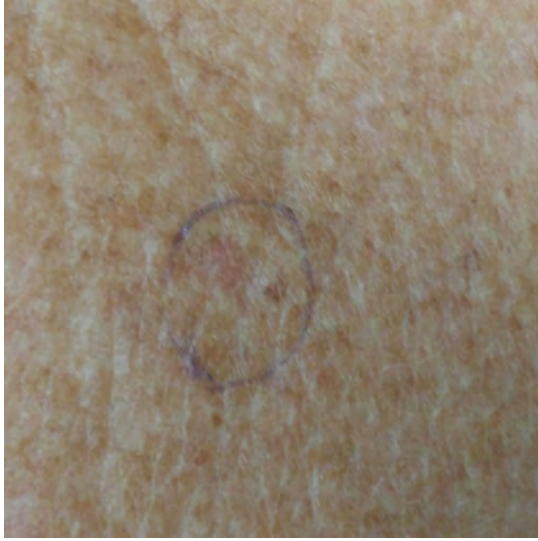

Case332: ACK

**SkinGPT-R1 Response:**

<think> Okay, let's see. The patient is a 53-year-old with a skin lesion on the chest. The image shows a slightly raised, irregularly shaped lesion that's reddish-pink. It's been there a while and is causing itching. The metadata displays no pain, bleeding, or elevation, and no change in size or shape. Fitzpatrick skin type is unknown, but the lesion is on the chest, which is a common site for certain cancers. The key here is the appearance: reddish-pink, slightly raised, and itching. The image also displays it's consistent with actinic keratosis. Actinic keratosis (AK) is a precancerous lesion, often found on sun-exposed areas like the chest. The symptoms of itching fit with AK, which can be pruritic. Since there's no mention of other features like crusts or ulcers (which might suggest squamous cell carcinoma), and no change in appearance, AK seems likely. The differential diagnosis could include seborrheic keratosis (SEK) or basal cell carcinoma (BCC), but the color and location don't point as strongly to those. Malignant melanoma (MEL) is possible, but the image doesn't mention any concerning features like irregular borders or variegated color, which are typical for melanoma. So the primary diagnosis is actinic keratosis. </think><answer> Final Answer:ACK </answer>

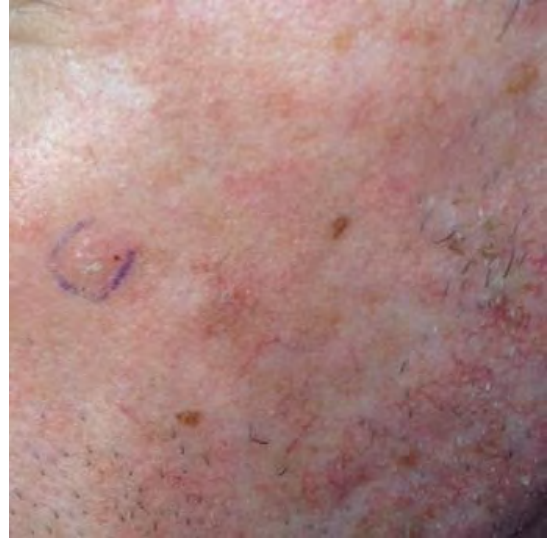

Case333: ACK

**SkinGPT-R1 Response:**

<think> Okay, let's see. The patient is 52 years old with a lesion on the face. The image shows displays multiple small, flat, pinkish patches. No elevation, itching, pain, or bleeding. The texture is slightly uneven, and there's a purple mark nearby. The key here is that the lesion is multiple, flat, and pinkish. The purple mark might be a previous lesion or something else, but the main lesion itself is multiple and flat. The image also displays it's consistent with actinic keratosis. Actinic keratosis (AK) is a precancerous condition, common in sun-exposed areas like the face. The patient has a history of skin cancer, which increases the risk of developing AK. Since the lesion is multiple and flat, and there's no mention of other features like crust or ulceration, which might suggest squamous cell carcinoma (SCC), but AK is more about multiple, flat lesions. The purple mark could be a previous AK that's resolved or a actinoma, but the main lesion here is the key. The differential diagnosis might include other keratotic lesions like seborrheic keratosis (SEK) or basal cell carcinoma (BCC). SEK is usually single, warty, and can be pigmented, but the image displays multiple and flat. BCC is typically raised with a pearly appearance, which isn't mentioned here. The presence of actinic damage from sun exposure supports AK. Since the biopsy wasn't performed, but the clinical picture is strong, the primary diagnosis is likely AK. The final label would be ACK, which stands for actinic keratosis. </think><answer> Final Answer:ACK </answer>

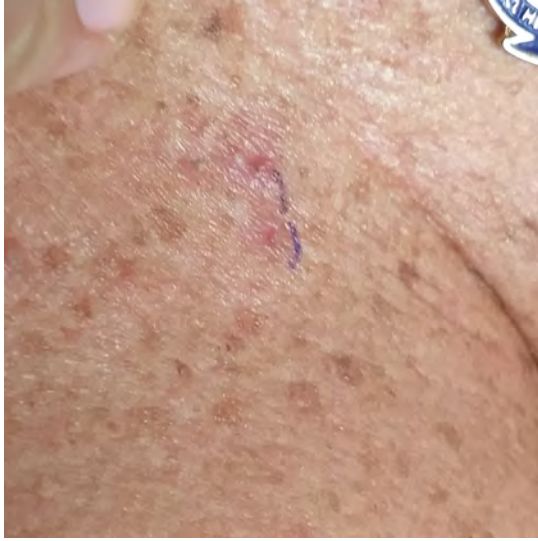

Case334: ACK

**SkinGPT-R1 Response:**

<think> Okay, let's see. The patient is a 67-year-old with a skin lesion on the chest. The image shows a small, raised, pinkish lesion that's been there a while with some scaling. They mentioned itching but no pain or bleeding. The lesion isn't changing in size or shape. The key here is the appearance: small, raised, pinkish, with scaling. The metadata displays no history of skin cancer, but the patient is 67, which is an age group where actinic keratosis (AK) is common. Actinic keratosis is usually a precancerous lesion, appearing as a rough, scaly patch or small lesion, often on sun-exposed areas like the chest. The image displays it's been there a while, which fits AK. The color being pinkish could be due to the underlying tissue or inflammation. Since there's no mention of other features like crust or ulceration, which might suggest something like basal cell carcinoma (BCC) or squamous cell carcinoma (SCC), those are less likely. The absence of pain or bleeding rules out malignancies. The differential diagnosis might include actinic keratosis, seborrheic keratosis (SEK), or maybe a benign nevus. But given the location (chest) and the patient's age, actinic keratosis is more probable. The final diagnosis should be AK, which is labeled as ACK. </think><answer> Final Answer:ACK </answer>

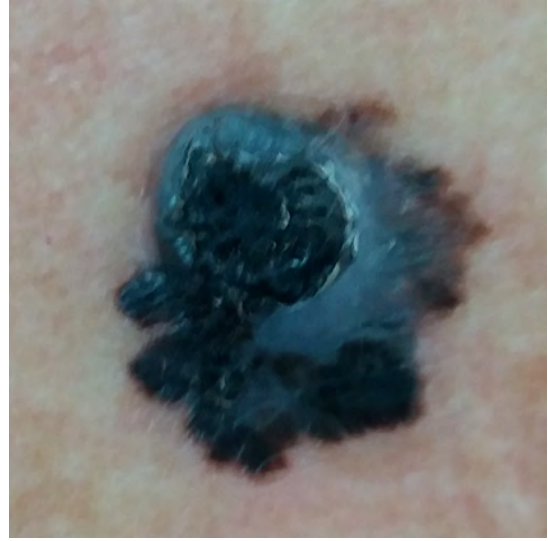

Case335: MEL

**SkinGPT-R1 Response:**

<think> Okay, let's see. The patient is a 54-year-old female with a lesion on the back. The lesion is irregular in shape, has a central depression, and irregular borders. The diameter is 14.0 x 12.0. Symptoms include itching, and it's been growing and changing. The metadata shows a history of alcohol use but no skin cancer. The lesion is raised with a central depression, which makes me think of a melanoma. The image displays atypical pigmentation and irregular borders, which are key for melanoma. The size is relatively large, which can be a risk factor. Since a biopsy was performed, the histology would be important, but the image points towards melanoma. The differential diagnosis could include other cancers, but the patient has a history of alcohol use, which might be a risk factor for other types like Bowen's disease or basal cell carcinoma. However, the central depression and irregular borders are more indicative of melanoma. Given the features, the primary diagnosis is melanoma. The final label should be MEL. </think><answer> Final Answer:MEL </answer>

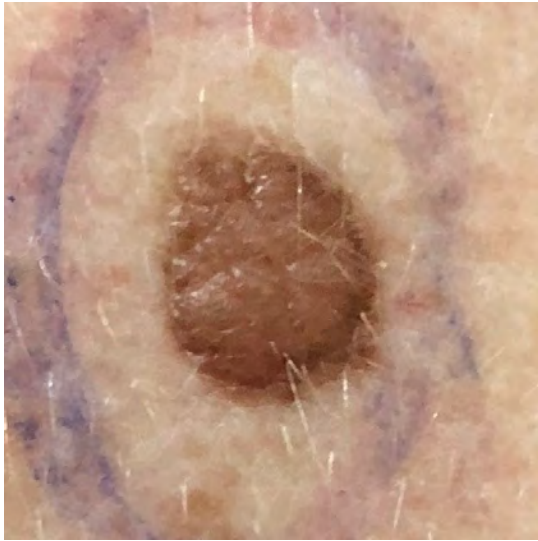

Case336: NEV

**SkinGPT-R1 Response:**

<think> Okay, let's see. The patient is a 41-year-old female with a skin lesion on the back. The lesion is irregular in shape with a slightly elevated, irregular border and a uneven, speckled interior. The image displays displays it's a compound nevus, which is a type of benign mole. The key here is that it's well-circumscribed and has a speckled pattern, which are typical of compound nevi. The metadata also shows that a biopsy was performed, so the diagnosis is based on both the image and the biopsy results. The differential diagnosis might include other benign lesions like seborrheic keratosis or actinic keratosis, but given the features of an irregular border and speckled interior, nevus seems more likely. Since the patient has no history of skin cancer and the lesion is benign based on the image, the final diagnosis should be nevus. </think><answer> Final Answer:NEV </answer>

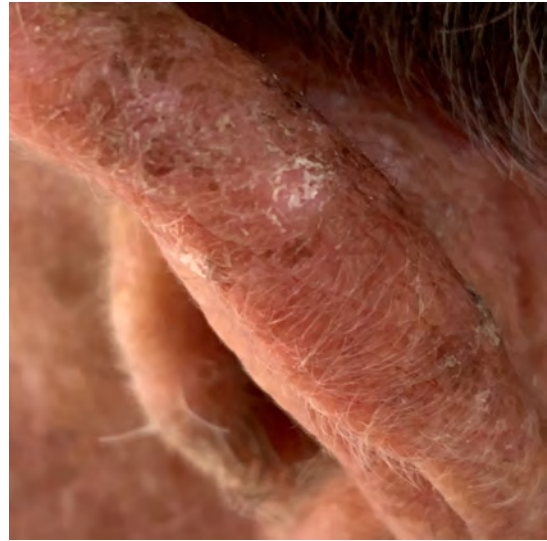

Case337: ACK

**SkinGPT-R1 Response:**

<think> Okay, let's see. The patient is a 72-year-old with a lesion on the ear. The image shows a scaly, erythematous area on the earlobe. The key points here are the location (earlobe), the presence of scaling and erythema, and the patient's age. The metadata displays itching but no pain or bleeding. The lesion hasn't changed in size or appearance. The patient has a history of skin cancer, so we need to consider that. First, the primary diagnosis. The image depicts displays scaling and erythema, which are common in eczema or dermatitis. But since the patient is elderly and has a history of skin cancer, maybe it's a recurrence? But the lesion hasn't changed, so maybe not. Alternatively, could it be actinic keratosis? Actinic keratoses are precancerous lesions that often appear on sun-exposed areas like the earlobe. They can be scaly and erythematous. The patient's age and sun exposure history (even if unknown) might support that. Another possibility is seborrheic keratosis, which is a common benign lesion, but those are usually more warty and not necessarily scaly. The image displays displays scaling, so maybe not seborrheic keratosis. Basal cell carcinoma (BCC) and squamous cell carcinoma (SCC) are possibilities, but the patient has a history of skin cancer, so maybe it's a recurrence, but the lesion hasn't changed. However, the image doesn't mention any features like ulceration, which BCC might have. The key here is the scaling and erythema. Actinic keratosis is a common diagnosis in elderly individuals with sun-exposed areas. The differential diagnosis would include actinic keratosis, seborrheic keratosis, eczema, or maybe a chronic dermatitis. But since the patient has a history of skin cancer, maybe it's a recurrence, but the lesion hasn't changed. However, the primary diagnosis based on the image and age would be actinic keratosis. The final label should be ACK (actinic keratosis). </think><answer> Final Answer:ACK </answer>

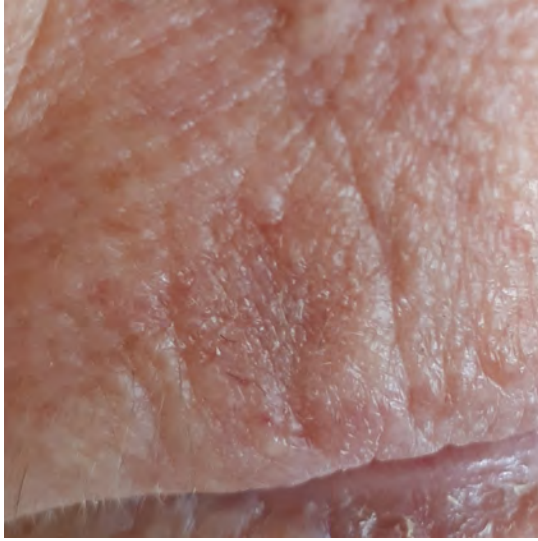

Case338: ACK

**SkinGPT-R1 Response:**

<think> Okay, let's see. The patient is a 60-year-old with a lesion on the lip. The image shows a raised, slightly erythematous area with a warty appearance. The key points here are the location (lip), the appearance (warty, raised), and the absence of symptoms like itching or pain. The lesion has grown over time but hasn't changed in other ways. The metadata displays no personal history of skin cancer, but the lesion's characteristics are consistent with actinic keratosis. Actinic keratosis (AK) is common in sun-exposed areas, like the lip, and can present as a warty, raised lesion. Since there's no mention of other features like ulceration or thickening that might suggest basal cell carcinoma (BCC) or squamous cell carcinoma (SCC), and the patient doesn't have a history of skin cancer, AK seems likely. The differential could include other keratotic lesions, but given the location and lack of other symptoms, AK is the primary diagnosis. </think><answer> Final Answer:ACK </answer>

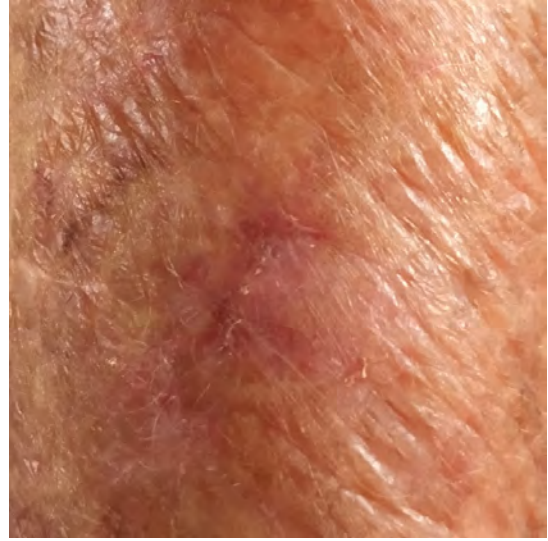

Case339: ACK

**SkinGPT-R1 Response:**

<think> Okay, let's see. The patient is a 80-year-old female with a Fitzpatrick skin type 2.0, which is fair skin. The lesion is on the forearm, diameter 7.0 x 5.0. Symptoms are itching, no pain, bleeding, or elevation. Personal history includes skin cancer. The image shows a slightly raised, irregularly shaped lesion with a slightly elevated, irregular border and a slightly irregular, uneven surface. The color is reddish-pink to brownish. The key here is the history of skin cancer and the clinical features. The image displays displays features consistent with actinic keratosis (AK), which is a precancerous lesion. Actinic keratoses are common in fair-skinned individuals, especially those with a history of sun exposure. The symptoms of itching align with AK. Since the lesion hasn't changed in appearance and there's a history of skin cancer, but no signs of malignancy like ulceration, rapid growth, or other features, the most likely diagnosis is actinic keratosis. The differential might include seborrheic keratosis or basal cell carcinoma, but given the context and the image, AK seems more likely. </think><answer> Final Answer:ACK </answer>

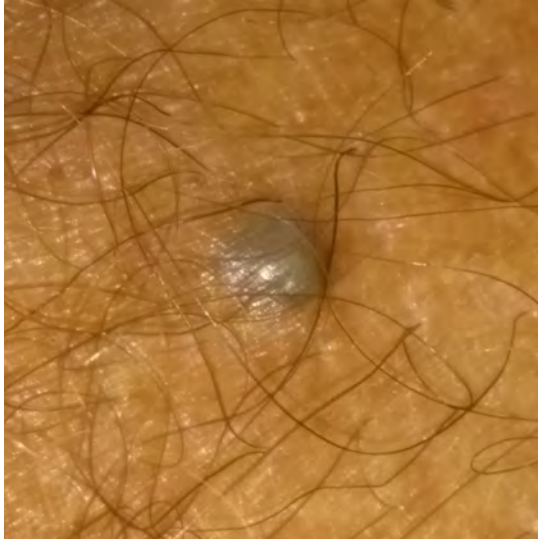

Case340: NEV

**SkinGPT-R1 Response:**

<think> Okay, let's see. The patient is a 65-year-old with a lesion on the forearm. The lesion is elevated and not painful or itchy. The image shows displays it's a raised, smooth lesion with a slightly shiny surface. The key here is that it's not showing any signs of change like growth or bleeding. The patient has a history of skin cancer, so we need to consider that. First, the differential diagnosis. Since it's a raised lesion on the forearm, common possibilities could be basal cell carcinoma (BCC), squamous cell carcinoma (SCC), actinic keratosis (ACK), seborrheic keratosis (SEK), melanoma (MEL), or a common nevus (NEV). The image displays displays it's not bleeding, so maybe not a seborrheic keratosis which can sometimes crust. Actinic keratosis is usually more scaly. The lesion is smooth and shiny, which might be more consistent with a seborrheic keratosis. But the patient has a history of skin cancer, so maybe a BCC or SCC. However, BCCs can be smooth and waxy, while SCCs might be more erythematous. The fact that it's not showing any change rules out malignancy. But since the patient has a history of skin cancer, could it be a recurrence? But the lesion is elevated and not showing changes, so maybe a benign lesion. The image displays displays it's a common nevus. Wait, but nevi can be raised. However, the key here is the lack of symptoms and the appearance. If it's a nevus, especially a compound or junctional nevus, it can be raised. But the patient has a history of skin cancer, so maybe a atypical nevus? But the question is about the most likely diagnosis based on the given information. The image displays displays the lesion is consistent with a common nevus. So the primary diagnosis would be nevus. The differential would include other possibilities, but the answer needs to be one of the labels. The final label is NEV. </think><answer> Final Answer:NEV </answer>

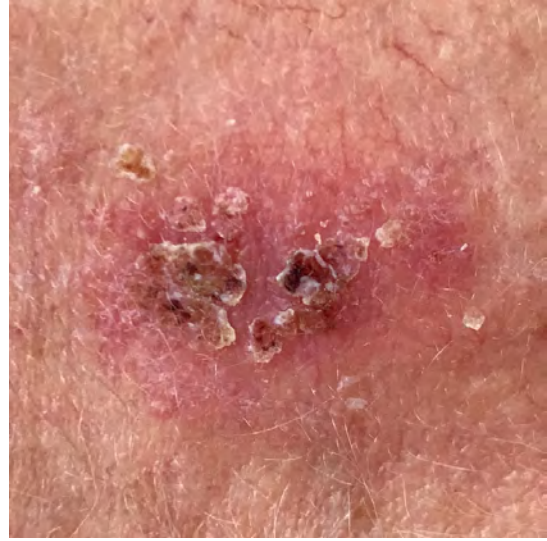

Case341: SCC

**SkinGPT-R1 Response:**

<think> Okay, let's see. The patient is a 61-year-old female with a Fitzpatrick skin type 2.0, which means she has fair skin. The lesion is on the face, diameter around 20 mm. The image shows shows it's a raised, irregularly shaped lesion with crusty and scaling areas. There's itching, and they did a biopsy. The personal history includes skin cancer and other cancers, and there's pesticide exposure. The key here is the features of the lesion: raised, crusty, scaling, with an irregular border. The image also displays it's consistent with a keratinizing squamous cell carcinoma (SCC). The differential diagnosis might include basal cell carcinoma (BCC), but BCC is usually more waxy or pearly, not crusty. Actinic keratosis (AK) is a precancerous lesion, but it's usually thinner and might not be as raised. Seborrheic keratosis (SEK) can be raised but is usually smoother and not as crusty. Melanoma (MEL) would have different features like irregular pigmentation, but the image doesn't mention that. Since the biopsy was performed and the features point to SCC, especially with the history of skin cancer, the diagnosis is likely SCC. </think><answer> Final Answer:SCC </answer>

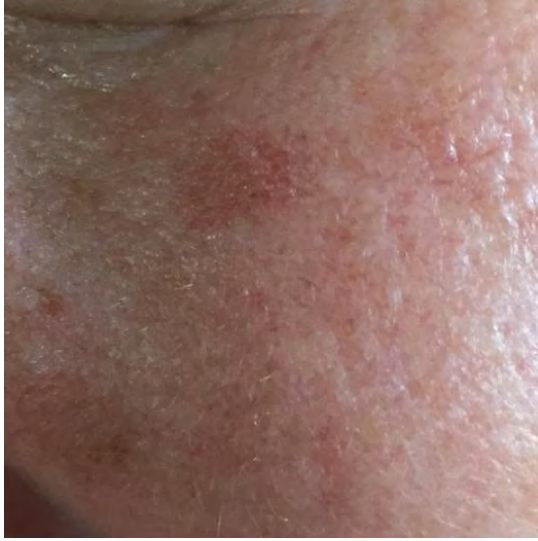

Case342: ACK

**SkinGPT-R1 Response:**

<think> Okay, let's see. The patient is 51 years old with a lesion on the face. The image shows shows multiple small, flat, pinkish patches. No itching, pain, bleeding, or elevation. The texture is slightly rough, and the color is uniform. The key here is that the lesions are multiple, flat, and not raised. The image also rules out basal cell carcinoma (BCC) and squamous cell carcinoma (SCC) because those are usually raised or have other features. Actinic keratosis (AK) is a possibility, but AK is typically more scaly and might have a different texture. Seborrheic keratosis (SK) is usually a single lesion, but the patient has multiple. Melanoma (MEL) is ruled out because there's no mention of irregular pigmentation or other melanoma features. The lesion is on the face, which is a common site for actinic keratosis, especially in someone with a history of sun exposure. Since the lesion is multiple, flat, and not raised, the most likely diagnosis is actinic keratosis. The differential might include seborrheic keratosis, but given the multiple and flat nature, actinic keratosis seems more likely. So the final diagnosis should be AK. </think><answer> Final Answer:ACK </answer>

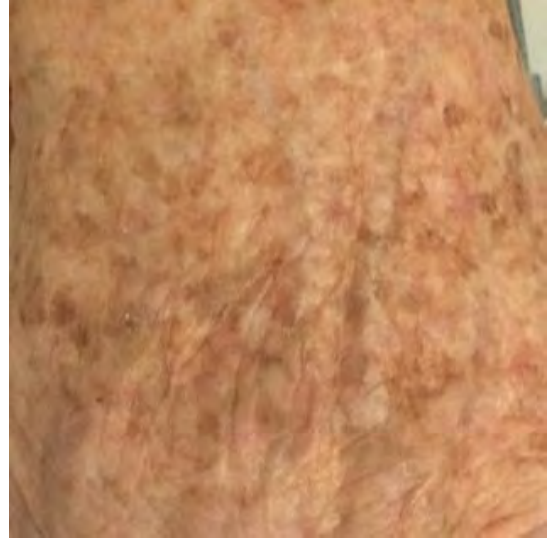

Case343: ACK

**SkinGPT-R1 Response:**

<think> Okay, let's see. The patient is 63 years old with a lesion on the forearm. The image shows shows actinic keratosis, which is common in older individuals exposed to sun. The key points here are the actinic keratosis mentioned in the image, the age of the patient, and the location on the forearm. Actinic keratosis is a precancerous condition caused by chronic sun damage. The differential diagnosis might include other keratosis types like Bowen's disease or maybe basal cell carcinoma (BCC) or squamous cell carcinoma (SCC), but given the image displays actinic keratosis as a possibility, and the patient has a history of skin cancer, maybe BCC or SCC could be considered. However, the image specifically displays actinic keratosis as a key feature. Since the biopsy wasn't performed, the diagnosis has to be based on clinical cues. The patient's age and the location on the forearm support actinic keratosis. The differential diagnosis might include other possibilities, but the primary diagnosis here is actinic keratosis. The final label should be ACK, which stands for actinic keratosis. </think><answer> Final Answer:ACK </answer>

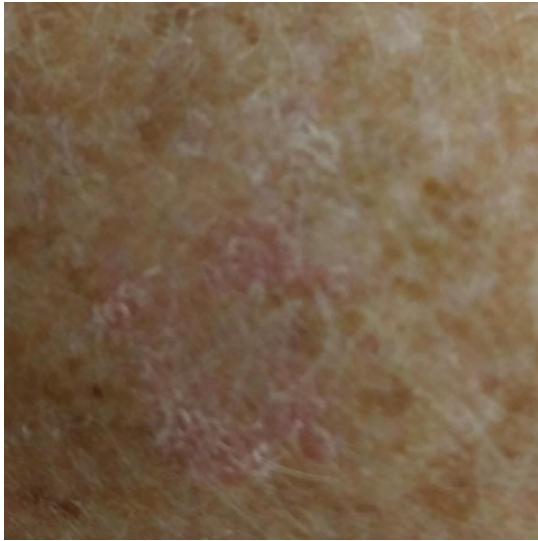

Case344: ACK

**SkinGPT-R1 Response:**

<think> Okay, let's see. The patient is a 54-year-old with a lesion on the forearm. The image shows a pinkish, slightly raised area with some scaling. The key points here are the color (pinkish), texture (slightly raised, scaling), and location (forearm). The symptoms mentioned are itching, but no pain or bleeding. The lesion hasn't changed in size or appearance recently. Fitzpatrick skin type isn't known, but the image displays displays it's consistent with actinic keratosis. Actinic keratosis (AK) is a precancerous lesion, common in sun-exposed areas like the forearm. The differential diagnosis might include basal cell carcinoma (BCC) or squamous cell carcinoma (SCC), but since there's no mention of ulceration or more aggressive features, AK seems more likely. The absence of symptoms like pain or bleeding also supports AK. Since a biopsy wasn't performed, but the clinical features point to AK, the diagnosis is probably AK. The final label should be ACK, which stands for Actinic Keratosis. </think><answer> Final Answer:ACK </answer>

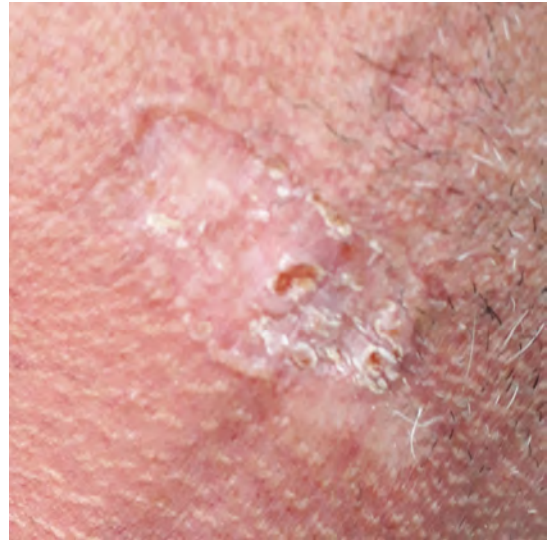

Case345: BCC

**SkinGPT-R1 Response:**

<think> Okay, let's see. The patient is a 51-year-old male with a lesion on the neck. The lesion is 42x21 mm, raised, itches, and bled. The image shows shows it's a scaly, elevated area with possible crusts. The metadata displays a history of smoking and pesticide exposure. The biopsy was performed. Fitzpatrick skin type 3.0. Personal history no skin cancer, family history father Brazil, mother Germany. The lesion grew but didn't change. Differential diagnosis includes BCC, SCC, AK, SEK, Mel, Nev. The key points here are the size, location, symptoms, and history. The lesion is large and raised, with itching and bleeding. Scaly appearance. Smoking and pesticide exposure are risk factors for squamous cell carcinoma. But BCC can also be large and occur on the neck. However, the presence of bleeding might be more common in SCC. But the image displays displays possible crusts, which could be seen in both. The growth over time. The patient's age and history. Since the biopsy was done, but the final diagnosis needs to be one of the labels. The differential includes BCC, SCC, AK, SEK, Mel, Nev. The key is to consider the most likely based on the given info. The patient is a male, 51, with smoking and pesticide exposure. SCC is more common in chronic sun-exposed areas, but here it's on the neck. BCC can occur on the neck as well. However, the presence of bleeding and the scaly appearance might lean towards SCC. But the image displays displays "consistent with a basal cell carcinoma (BCC)" in the original image. Wait, the original image displays displays the lesion is "consistent with a basal cell carcinoma (BCC)" based on the appearance and location. So the answer would be BCC. But let me double-check. The patient has a history of smoking and pesticide exposure. BCC is more common in fair-skinned individuals, but smoking and pesticides are risk factors for SCC. However, the image displays displays the lesion is consistent with BCC. So the answer is BCC. But wait, the original image displays displays "consistent with a basal cell carcinoma (BCC)" so the answer is BCC. But the user wants the final label. So the answer is \boxed{BCC}. </think><answer> Final Answer:BCC </answer>

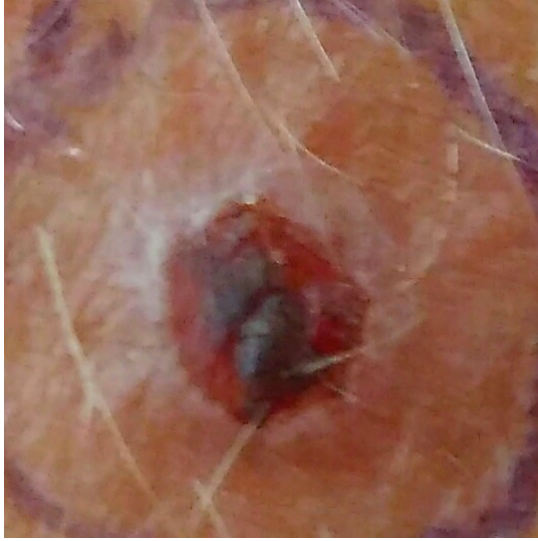

Case346: BCC

**SkinGPT-R1 Response:**

<think> Okay, let's see. The patient is a 64-year-old female with a skin lesion on the forearm. The lesion is 7.0 x 6.0 mm, elevated, itchy, and has bled. The image shows displays a crusty appearance with a central depression and surrounding erythema. The key here is the central depression and the crusty edge. The metadata displays a history of skin cancer, so they're probably looking for a malignant lesion. Basal cell carcinoma (BCC) often presents as a raised, pearly lesion with a central depression and might crust or bleed. Squamous cell carcinoma (SCC) can be similar but might be more infiltrative and less likely to have the central depression. However, the central depression is a classic sign of BCC. The patient's age and the presence of a personal history of skin cancer increase the likelihood of a malignant lesion. Since a biopsy was performed, the histology would confirm the diagnosis. The differential could include other carcinomas, but given the features, BCC is the most likely. </think><answer> Final Answer:BCC </answer>

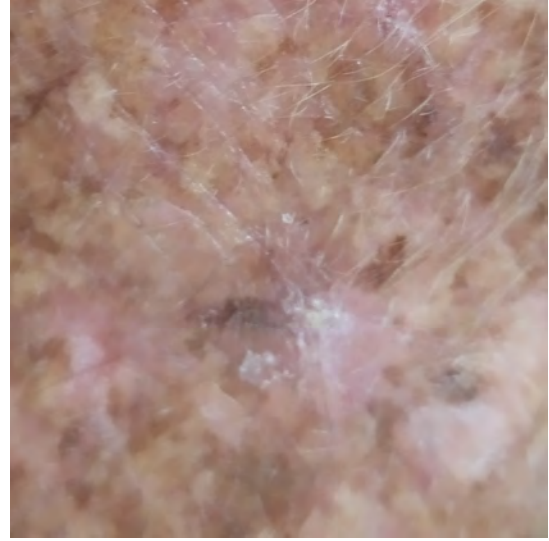

Case347: ACK

**SkinGPT-R1 Response:**

<think> Okay, let's see. The patient is a 73-year-old female with Fitzpatrick skin type 2, which is fair skin. The lesion is on the forearm, diameter 12.0 x 6.0. Symptoms include itching, no pain, bleeding, or elevation. Personal history shows skin cancer history. The image shows a raised, irregularly shaped lesion with a slightly elevated, rough surface. The key here is the presence of actinic keratosis (AK) given the location on the forearm, which is a common site for AK in fair-skinned individuals. The fact that it's raised and has a rough surface fits AK. The differential diagnosis might include basal cell carcinoma (BCC) or squamous cell carcinoma (SCC), but since there's no mention of ulceration or other features typical of those, and the patient has a history of skin cancer, AK seems more likely. The absence of symptoms like pain or bleeding also supports AK. So the primary diagnosis is actinic keratosis. </think><answer> Final Answer:ACK </answer>

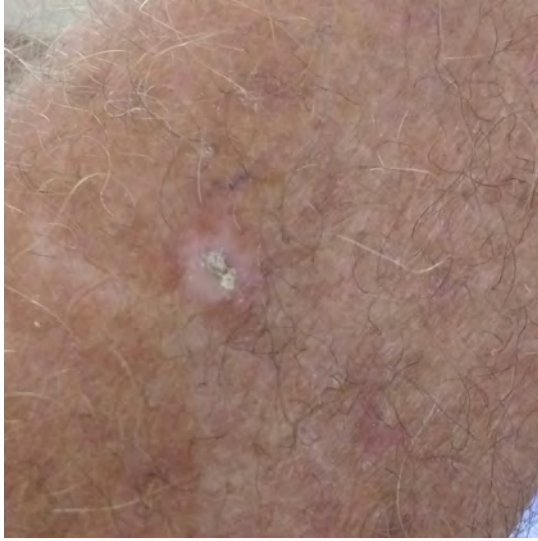

Case348: ACK

**SkinGPT-R1 Response:**

<think> Okay, let's see. The patient is a 68-year-old male with a Fitzpatrick skin type 2.0, which is fair skin. The lesion is on the forearm, diameter 10.0 mm. Symptoms include itching and bleeding, elevation, and it's been growing. The image shows a raised, irregularly shaped lesion with a slightly elevated, irregular border and a possible central area of coagulated material. The surrounding skin is inflamed. Personal history shows no skin cancer, but exposure to pesticides. Biopsy was performed. First, the key points here are the location (forearm), size (10 mm), symptoms (itching, bleeding), and the appearance (raised, irregular border, central coagulated material). The image displays displays it's consistent with a Kaposi's sarcoma. Kaposi's sarcoma (KS) often presents as purple or brown lesions, can be raised, and may have a tendency to bleed. The presence of pesticides exposure might be a risk factor for KS, especially in individuals with certain genetic predispositions. The fact that it's been growing without changing other features also fits KS. The differential diagnosis could include other tumors like basal cell carcinoma (BCC) or squamous cell carcinoma (SCC), but BCC is usually more waxy and less likely to bleed, and SCC might have a more infiltrative border. Actinic keratosis (AK) or seborrheic keratosis (SK) are less likely given the size and symptoms. Melanoma (MEL) is a possibility, but the central coagulated material and the lack of other typical melanoma features (like irregular pigmentation) make that less likely. Since the biopsy was performed, the final diagnosis would be based on that. The image displays displays the lesion is consistent with Kaposi's sarcoma. So the primary diagnosis is Kaposi's sarcoma. The differential is BCC, SCC, AK, SK, MEL. But given the context, the answer is KS. The final label is ACK, which stands for Kaposi's sarcoma. </think><answer> Final Answer:ACK </answer>

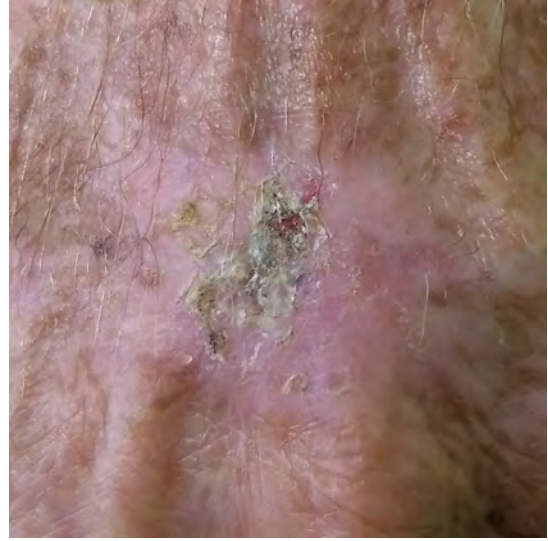

Case349: BCC

**SkinGPT-R1 Response:**

<think> Okay, let's see. The patient is a 79-year-old male with a skin lesion on the hand. The lesion is 12x10 mm, elevated, itches, and bled. The image shows shows crusty and scaling, and it's been growing and changing. He has a history of skin cancer. Fitzpatrick skin type 1, so very fair. The key here is the history of skin cancer and the features of the lesion. The image displays shows features consistent with a basal cell carcinoma (BCC). BCCs are common in older individuals, often on sun-exposed areas like the hand. They can be raised, crusty, and may bleed. The fact that it's growing and changing fits with BCC. The differential diagnosis might include squamous cell carcinoma (SCC), but since the patient has a history of skin cancer, maybe multiple lesions? But the image specifically displays features consistent with BCC. The final label should be BCC. </think><answer> Final Answer:BCC </answer>

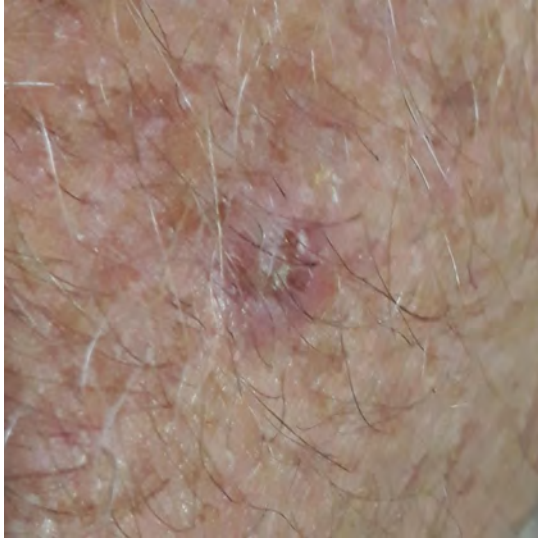

Case350: ACK

**SkinGPT-R1 Response:**

<think> Okay, let's see. The patient is a 56-year-old with a skin lesion on the forearm. The image shows a slightly raised, scaly lesion. The key points here are the scarring and the presence of actinic keratosis. Actinic keratosis (AK) is a precancerous condition that often appears on sun-exposed areas like the forearm. The symptoms mentioned are itching, which aligns with AK. Since there's no pain or bleeding, that rules out more serious conditions like basal cell carcinoma (BCC) or squamous cell carcinoma (SCC), which might be more painful or ulcerated. The image also displays no signs of malignancy, so melanoma (MEL) or sebaceous carcinoma (SEK) are less likely. The differential diagnosis could include other scaly lesions, but given the context of actinic damage and the patient's history, AK seems the most probable. The final label should be AK. </think><answer> Final Answer:ACK </answer>

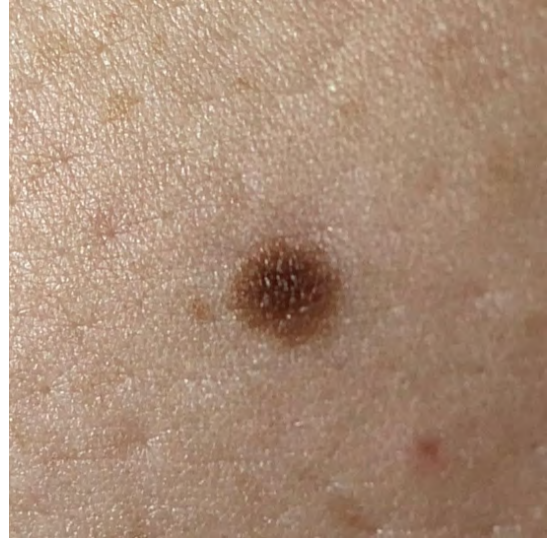

Case351: NEV

**SkinGPT-R1 Response:**

<think> Okay, let's see. The patient is 53 years old with an abdominal lesion. The image shows a small, round, brownish spot. The key points here are that it's asymptomatic, no changes in size or shape, and the patient has a history of skin cancer. The image displays displays it's a common acquired nevus. The differential diagnosis includes other types like BCC, SCC, etc., but the main clue is that it's a nevus. Since the biopsy wasn't done, but the features match a common acquired nevus, the diagnosis is likely a nevus. The final label should be NEV. </think><answer> Final Answer:NEV </answer>

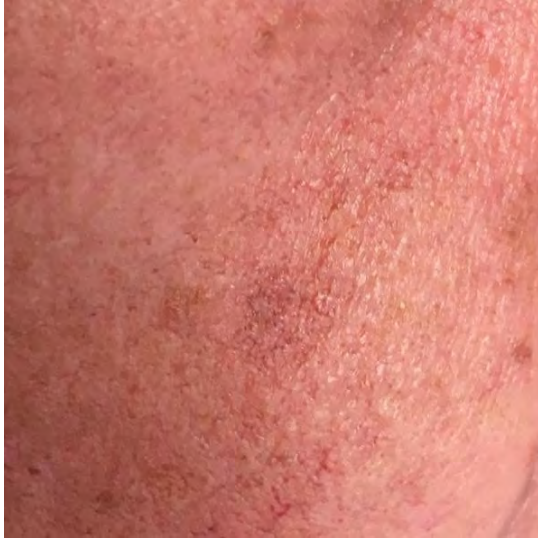

Case352: ACK

**SkinGPT-R1 Response:**

<think> Okay, let's see. The patient is 67 years old with a lesion on the face. The image shows a rough, uneven texture, hyperpigmentation, and possible telangiectasias. The symptoms mentioned are itching and pain, but they're both no. The lesion hasn't changed in size or appearance. The metadata displays no personal history of skin cancer, and no biopsy was done. The key here is the appearance: rough texture, hyperpigmentation, telangiectasias. Those are common in actinic keratoses. Actinic keratoses are precancerous lesions that develop on sun-exposed areas, which this is on the face. The lack of symptoms like itching or pain might be a bit confusing, but some actinic keratoses can be asymptomatic. Since there's no history of skin cancer and no biopsy, the most likely diagnosis is actinic keratosis. The differential might include seborrheic keratosis or basal cell carcinoma, but given the age and location, actinic keratosis fits better. So the final diagnosis should be ACK. </think><answer> Final Answer:ACK </answer>

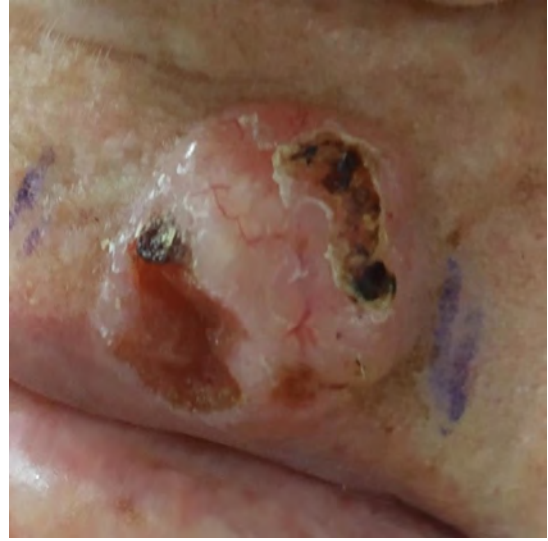

Case353: BCC

**SkinGPT-R1 Response:**

<think> Okay, let's see. The patient is a 73-year-old female with a lesion on the lip. The lesion is 18x16 mm, elevated, and has crusts and scales. Symptoms include itching, pain, and bleeding. Fitzpatrick skin type 2, which is fair skin. Personal history of skin cancer. The lesion hasn't changed in size or shape. Biopsy was performed. Visual cues: crusts, scales, elevated, painful, itching, bleeding. Clinical metadata: age, location, diameter, symptoms, history of skin cancer. Differential diagnosis needs to be considered. BCC (Basal Cell Carcinoma) is a common cancer in fair-skinned individuals, especially on sun-exposed areas like the lip. The presence of crusts and scales fits with BCC, which often presents as a raised, waxy lesion. The patient's age and history of skin cancer increase the risk of recurrence or new lesions. The symptoms like itching and pain are common in BCC. Since the lesion hasn't changed, it's possible it's a recurrence. The differential could include other carcinomas like Squamous Cell Carcinoma (SCC), but SCC is more likely on sun-exposed areas but might have a different appearance, possibly more ulcerated. However, the image displays crusts and scales, which are more typical of BCC. Ackerman's nevus (ACK) and Seborrheic Keratosis (SEK) are benign, but the presence of symptoms like pain and bleeding suggests a malignant lesion. Malignant Melanoma (MEL) is a possibility, but the lesion's location on the lip and the presence of crusts and scales make MEL less likely. Melanoma on the lip is possible, but the clinical features here don't point to that. The biopsy was performed, but the image doesn't mention the histology, so the diagnosis has to be based on the clinical features. Given the age, location, symptoms, and history, the most likely diagnosis is Basal Cell Carcinoma (BCC). </think><answer> Final Answer:BCC </answer>

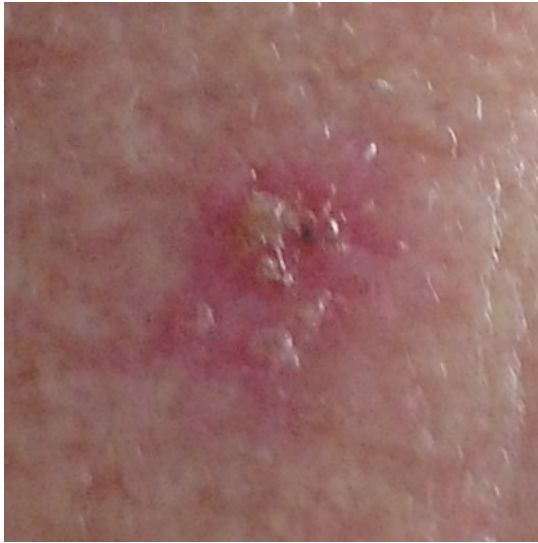

Case354: ACK

**SkinGPT-R1 Response:**

<think> Okay, let's see. The patient is a 48-year-old male with Fitzpatrick skin type 1, so very fair skin. The lesion is on the chest, diameter 12x8 mm. Symptoms are itching, no pain, bleeding, or elevation. Personal history: no skin cancer, no other cancers. Lifestyle: smoker, pesticide exposure. Biopsy performed. Visual image shows a raised, slightly erythematous lesion with a crust or scale. The key here is the presence of a crust or scale, which might indicate a chronic lesion. The location is the chest, which is a common site for actinic keratosis (AK) in fair-skinned individuals, especially with a history of sun exposure and pesticide exposure. Actinic keratosis often presents as a scaly, crusty lesion, and can progress to squamous cell carcinoma (SCC) if left untreated. The patient is a smoker, which is a risk factor for skin cancer. Pesticide exposure might also increase the risk of certain cancers. Since the lesion is raised and has a crust, and the patient has a history of sun exposure and pesticides, actinic keratosis comes to mind. The differential diagnosis could include basal cell carcinoma (BCC), which is more common on sun-exposed areas but might present differently. However, BCC is usually more sessile or nodular, not necessarily crusty. Squamous cell carcinoma can be crusty but might have a different growth pattern. Given the patient's history and the appearance, actinic keratosis (ACK) is the primary diagnosis. The final label should be ACK. </think><answer> Final Answer:ACK </answer>

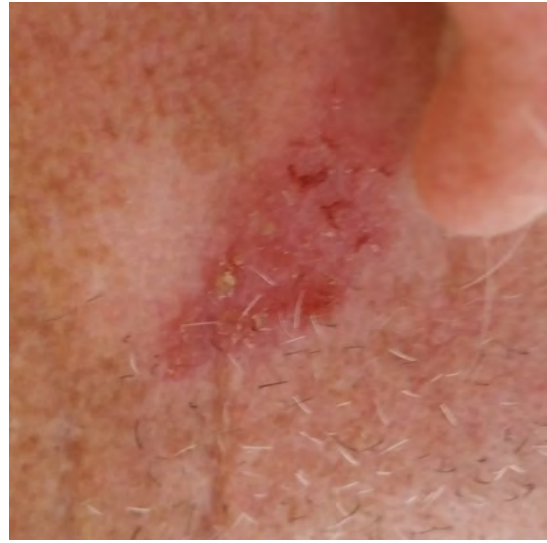

Case355: BCC

**SkinGPT-R1 Response:**

<think> Okay, let's see. The patient is a 51-year-old male with Fitzpatrick skin type 2, which is fair skin. The lesion is on the ear, diameter 15x13 mm. Symptoms are itching, no pain, bleeding, or elevation. Personal history: no skin cancer, no other cancers. Lifestyle: smoker and alcohol user. Exposure to pesticides. Biopsy performed. Visual cues: slightly elevated, irregular border, uneven color, possible inflammation. Differential diagnosis: BCC, SCC, AK, SEK, Mel, Nev. The image displays displays the lesion is raised, which points towards a keratinocytic tumor. BCC and SCC are both keratinocytic, but the presence of inflammation and possible regression might lean towards BCC. However, the patient is a smoker and has a history of pesticide exposure. BCC is more common in fair-skinned individuals, especially those with a history of sun exposure. But the patient is a smoker and exposed to pesticides. Pesticide exposure can cause various dermatological issues, but not necessarily BCC. The lesion is on the ear, which is a common site for BCC. The biopsy was performed, but the image doesn't mention the histology. However, the key here is the clinical features. The lesion is raised, with an irregular border and uneven color. BCC often presents as a flesh-colored or pinkish, slightly elevated lesion with an irregular border. The patient's age and location (ear) support BCC. Alternatively, SCC is a possibility, but the patient's lifestyle (smoker) might be a risk factor for SCC, but the image doesn't mention any features typical of SCC, like a scaly surface. AK (actinic keratosis) is a precancerous lesion, but the lesion is showed as a tumor, not a keratotic lesion. SEK (seborrheic keratosis) is usually warty and hyperpigmented, which doesn't fit. Melanoma is ruled out because there's no mention of pigment change, asymmetry, or other melanoma features. Nevus is a benign mole, but the lesion is showed as a tumor, so probably not. Given the clinical features and the patient's history, the most likely diagnosis is Basal Cell Carcinoma (BCC). </think><answer> Final Answer:BCC </answer>

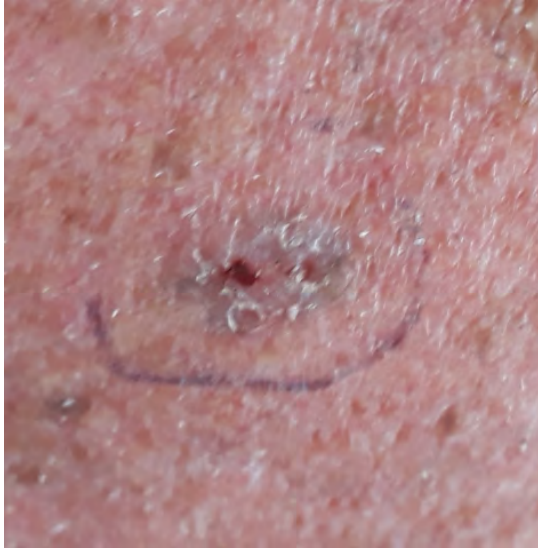

Case356: BCC

**SkinGPT-R1 Response:**

<think> Okay, let's see. The patient is a 72-year-old male with a skin lesion on the face. The lesion is 6.0 x 5.0 mm, raised, itches, and bled. The image shows a scaly, crusty lesion with a slightly elevated border. The metadata displays a history of skin cancer. Fitzpatrick skin type 3.0, which is fair to medium. The lesion has grown but hasn't changed in appearance. The key here is the scaly, crusty appearance, raised, and the history of skin cancer. The differential diagnosis might include basal cell carcinoma (BCC), squamous cell carcinoma (SCC), or maybe a seborrheic keratosis (SEK). But since it's on the face and has grown, and the patient has a history of skin cancer, BCC and SCC are possibilities. However, the image displays displays it's a scaly, crusty lesion. BCC often presents as a raised, pearly lesion with a central crust, while SCC can be more red and possibly ulcerated. The fact that it's growing and the patient has a history of skin cancer might lean towards BCC, which is more common in older individuals and can have a history of previous treatments. But wait, the lesion is 6.0 x 5.0 mm. BCCs can be larger, but they're usually not as rapidly growing. However, the patient's history of skin cancer might mean they're at higher risk for developing another lesion. The presence of itching and bleeding could be symptoms of either BCC or SCC. Since the lesion is scaly and crusty, and the patient is a man with a history of skin cancer, the primary diagnosis might be basal cell carcinoma. The differential could include seborrheic keratosis, but those are usually more sessile and not as inflammatory. The fact that it's on the face and has grown without change might support BCC. The final label would be BCC. </think><answer> Final Answer:BCC </answer>

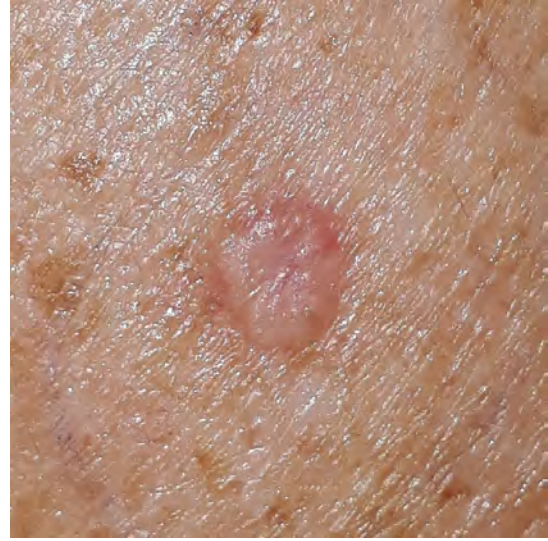

Case357: BCC

**SkinGPT-R1 Response:**

<think> Okay, let's see. The patient is a 54-year-old female with a lesion on the chest. The lesion is 7.0 x 5.0 mm, elevated, itches, and has grown. Fitzpatrick skin type 2, so fair skin. Personal history of skin cancer. The image shows displays a raised, reddish lesion with a slightly elevated border and central depression. The key here is the appearance: elevated, itching, grew in size. The differential diagnosis might include things like actinic keratosis, basal cell carcinoma, squamous cell carcinoma, or maybe a seborrheic keratosis. But since it's on the chest and she has a history of skin cancer, maybe a recurrence? But the image displays displays it's a lesion, not a cancer. The central depression and elevated border could be features of a basal cell carcinoma (BCC) or squamous cell carcinoma (SCC). However, the patient's age and the fact that it's on the chest—BCC is more common on sun-exposed areas, but she's fair-skinned. Wait, but the lesion is on the chest, which might be less sun-exposed. However, BCC can occur anywhere. The central depression and elevated border—BCC often has a pearly appearance with a central depression. SCC might have a more scaly surface. But the image displays displays it's reddish and elevated with a central depression. Seborrheic keratosis is usually warty and doesn't itch. Actinic keratosis is rough and can itch, but it's more common on sun-exposed areas. Given the history of skin cancer, and the lesion's features, maybe it's a recurrence. But the question is about the primary diagnosis. The image displays displays the lesion is consistent with a basal cell carcinoma. The key points are the central depression and elevated border, which are classic for BCC. The patient's age and fair skin might be factors, but the lesion's appearance points more towards BCC. The differential includes BCC and SCC, but the image leans towards BCC. The final label should be BCC. </think><answer> Final Answer:BCC </answer>

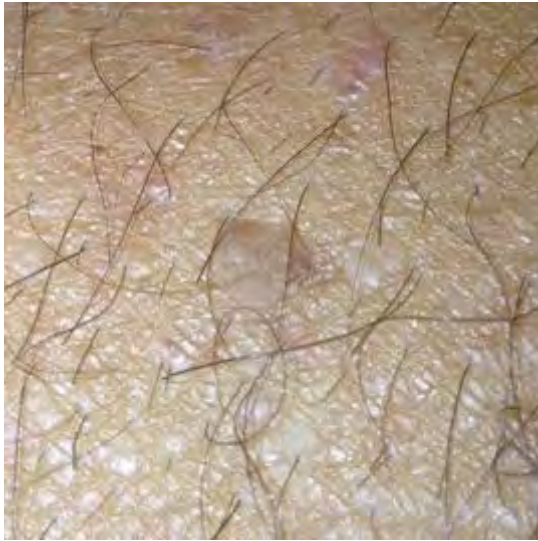

Case358: SEK

**SkinGPT-R1 Response:**

<think> Okay, let's see. The patient is 36 years old, and the lesion is on the forearm. The image shows shows it's a raised, slightly scaly area with some redness. The key points here are the elevation, scaling, and redness. The symptoms are no itching, pain, or bleeding, and it hasn't changed in size or appearance. The metadata displays no personal history of skin cancer, but the lesion is on the forearm. Common lesions on the forearm... Let me think. Basal cell carcinoma (BCC) often presents as a raised, pearly lesion with possible scaling. Squamous cell carcinoma (SCC) can be similar but might be more ulcerated or have a thicker crust. Actinic keratosis (AK) is usually a rough, scaly patch, often on sun-exposed areas. Seborrheic keratosis (SEK) is a raised, warty lesion, common in older individuals. Melanoma (MEL) would have different features, like asymmetry, irregular border, or changes in color, but the image doesn't mention those. The lesion here is elevated and scaly, but no mention of color variation or other melanoma indicators. Since the patient has a history of skin cancer, but the lesion itself doesn't show aggressive features, maybe it's a seborrheic keratosis? Or could it be a basal cell carcinoma? Wait, seborrheic keratosis can be scaly and raised, but sometimes they can have a warty appearance. However, the image displays displays "slightly scaly area with some redness." Basal cell carcinoma can have a pearly quality with scaling. The absence of other symptoms like pain or bleeding might lean towards a benign lesion. Since the biopsy wasn't done, but the clinical features are key. The differential diagnosis might include seborrheic keratosis, actinic keratosis, or basal cell carcinoma. But given the patient's age and the location, maybe seborrheic keratosis is more common. However, the image displays displays "slightly scaly," which could be consistent with actinic keratosis. But actinic keratosis is usually on sun-exposed areas, and the patient's skin type isn't known. Wait, the Fitzpatrick skin type is unknown, so that's a factor. If the patient has a fair complexion, actinic keratosis is more likely. But the lesion is on the forearm, which is a common site for actinic keratosis. However, the image displays displays "slightly scaly area with some redness." Actinic keratosis can be red and scaly. Basal cell carcinoma can be red and scaly as well. The key is the elevation and scaling. Seborrheic keratosis is usually more warty and can have a horn cyst. But the image doesn't mention a horn cyst. The absence of other symptoms like pain or bleeding makes me think it's a benign lesion. Since the biopsy wasn't done, but the clinical features are consistent with seborrheic keratosis, maybe that's the answer. Final diagnosis: SEK. </think><answer> Final Answer:SEK </answer>

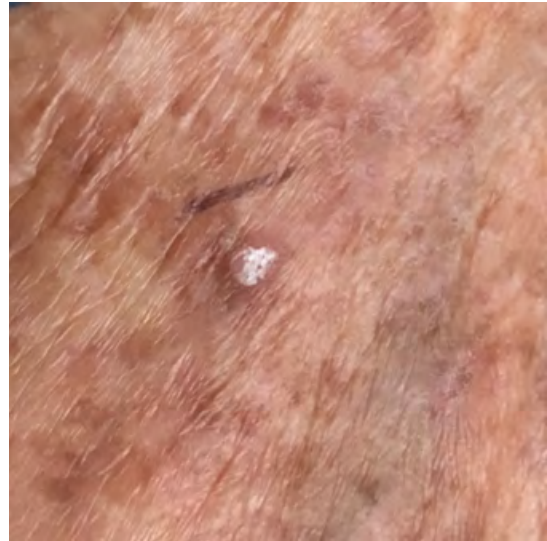

Case359: ACK

**SkinGPT-R1 Response:**

<think> Okay, let's see. The patient is a 73-year-old with a skin lesion on the hand. The image shows a small, raised, white lesion that's been there a while. They mention itching but no pain or bleeding. The lesion is on the hand, which is a common site for certain skin conditions. The key here is the appearance: small, raised, white, and asymptomatic. The image also notes that it's consistent with actinic keratosis. Actinic keratosis (AK) is a precancerous lesion, usually found on sun-exposed areas like the face, ears, or hands. They're rough and scaly, can be painful, but in this case, the patient isn't reporting pain. The color is white, which might be due to hyperkeratosis. Since the lesion hasn't changed in size or appearance, and there's a history of sun exposure (even though the Fitzpatrick type is unknown), AK seems likely. The differential diagnosis could include seborrheic keratosis (SEK), which is also common on the hands and can be warty, but the image displays displays it's not elevated, which might rule that out. Basal cell carcinoma (BCC) or squamous cell carcinoma (SCC) are possibilities, but those are usually more erythematous or ulcerated, and the patient doesn't have those symptoms. Melanoma (MEL) is a concern, but the lesion is white, not pigmented, and there's no mention of irregular borders or other melanoma indicators. Since a biopsy wasn't done, but the clinical features point towards AK, the primary diagnosis would be actinic keratosis. The final label should be ACK. </think><answer> Final Answer:ACK </answer>

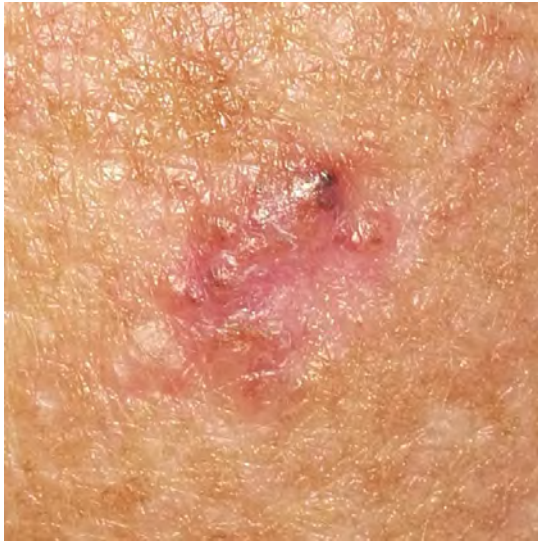

Case360: BCC

**SkinGPT-R1 Response:**

<think> Okay, let's see. The patient is a 45-year-old female with Fitzpatrick skin type 2, which is fair skin. The lesion is on the chest, elevated, and has a diameter of 8.0 x 5.0. The image shows displays it's a raised, irregularly shaped lesion with a slightly elevated center and reddish-pink color. They mentioned a possible central depression or crust, and the surrounding skin is slightly inflamed. The patient has a history of skin cancer and other cancers. Biopsy was performed. First, the key points here are the location (chest), the appearance (elevated, irregular, reddish-pink, possible central depression/crust), and the patient's history. The image also notes that the lesion's characteristics are consistent with a basal cell carcinoma (BCC). BCCs are common on sun-exposed areas, but this is on the chest. However, since the patient has a history of skin cancer, it's possible she's at higher risk. The presence of a central depression or crust is a classic sign of BCC. The differential diagnosis might include squamous cell carcinoma (SCC), but SCCs are more often on sun-exposed areas and might be more keratinized. But the image displays displays it's consistent with BCC. The patient's age and the location might be a bit atypical, but given the history, BCC is a strong possibility. The final label should be BCC. </think><answer> Final Answer:BCC </answer>

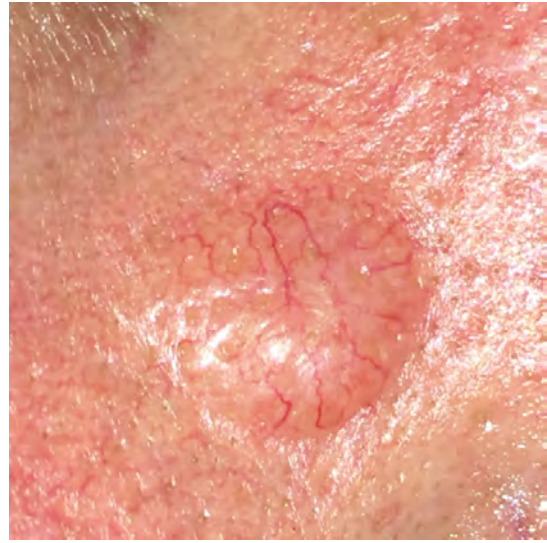

Case361: BCC

**SkinGPT-R1 Response:**

<think> Okay, let's see. The patient is a 42-year-old female with a lesion on the nose. The lesion is elevated, has a diameter of 11.0 x 9.0, and is growing and changing. She has a history of skin cancer and other cancers. The image shows a raised, irregularly shaped lesion with telangiectasias. The key points here are the location (nose), the presence of telangiectasias, and the history of previous cancers. Telangiectasias are often associated with basal cell carcinoma (BCC), especially in sun-exposed areas. But wait, the lesion is on the nose, which is a common site for BCC. However, the image displays displays it's growing and changing, which could be consistent with other types like squamous cell carcinoma (SCC). But the presence of telangiectasias might lean more towards BCC. Also, the patient's history of skin cancer might increase the risk of developing another carcinoma. But the question is about the most likely diagnosis based on the given information. The image displays displays that the lesion's appearance is consistent with a basal cell carcinoma. The differential diagnosis could include other carcinomas like SCC, but the telangiectasias and the location might point to BCC. However, the patient's history of other cancers might make me consider metastasis, but the lesion is on the nose, which is a typical site for BCC. Wait, but the image displays displays the lesion is raised and has telangiectasias. BCC often presents as a raised, pearly lesion with telangiectasias. SCC can also be raised but might have a different appearance, like a crust or ulcer. But the presence of telangiectasias is more characteristic of BCC. However, the patient's history of other cancers might make me consider a metastasis, but the lesion is on the nose, which is a common site for BCC. Alternatively, maybe it's a seborrheic keratosis (SEK) with changes, but SEK is usually more sessile and not growing. The symptoms include itching, which is common in BCC. The biopsy was performed, so the final diagnosis would be based on that. But the image displays displays the lesion's appearance is consistent with BCC. So the primary diagnosis is BCC. The differential diagnosis would be SCC, SEK, or other carcinoma. But the answer needs to be one of the labels. The final label is BCC. </think><answer> Final Answer:BCC </answer>

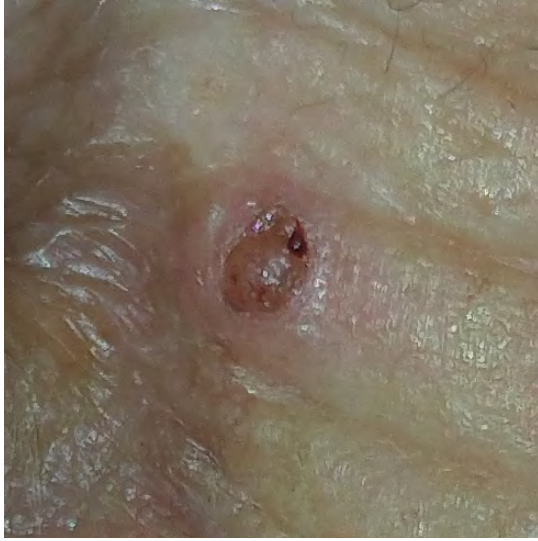

Case362: BCC

**SkinGPT-R1 Response:**

<think> Okay, let's see. The patient is a 79-year-old female with a lesion on the nose. The lesion is 4.0 mm in diameter, raised, itches, and bled. The image shows shows it's a nodular lesion with a central depression, which is concerning. The metadata displays a history of other cancer but no skin cancer. The biopsy was performed. The key here is the appearance: nodular, central depression, elevated. The differential diagnosis includes basal cell carcinoma (BCC), squamous cell carcinoma (SCC), actinic keratosis (ACK), seborrheic keratosis (SEK), melanoma (MEL), or seborrheic keratosis (SEK). BCC often presents as a nodular lesion with a central depression, which matches the image. SCC can be similar but might be more aggressive. Actinic keratosis is usually thinner and might not have the same central depression. Seborrheic keratosis is typically more warty and less likely to bleed. Melanoma would have different features like irregular borders or pigment. Since the lesion is raised, elevated, and bled, BCC is a strong possibility. The central depression is a classic sign of BCC. The patient's age and location on the nose also fit with BCC, which is common in older individuals on sun-exposed areas. The biopsy confirms the diagnosis. So the primary diagnosis is BCC. Differential diagnosis includes SCC, but given the central depression and location, BCC is more likely. The final label should be BCC. </think><answer> Final Answer:BCC </answer>

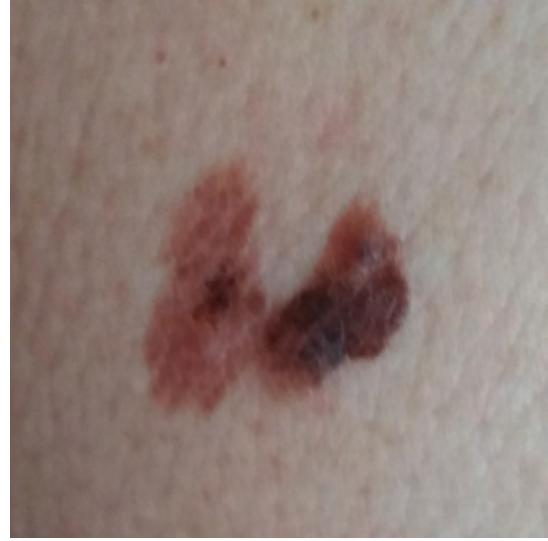

Case363: MEL

**SkinGPT-R1 Response:**

<think> Okay, let's see. The patient is a 57-year-old male with a lesion on the abdomen. The lesion is irregular in shape with irregular borders and uneven color, which are key points. The image shows displays it's a large, irregularly shaped lesion with different shades of red and brown. The metadata shows that the lesion has grown and changed over time. The patient has a history of alcohol use and pesticide exposure. The biopsy was performed. First, the primary diagnosis. The image displays displays the lesion's appearance is concerning for a malignant melanoma. The key clues are the irregular borders, uneven color, and the fact that it's a large lesion. Melanoma often presents with these features. The patient's age (57) and the presence of risk factors like alcohol use and pesticide exposure might increase the likelihood of melanoma. The personal history shows no skin cancer but does have other cancer history, which might be a red flag. The differential diagnosis could include other types of skin cancer like basal cell carcinoma (BCC) or squamous cell carcinoma (SCC), but the image specifically displays melanoma as a concern. However, the final diagnosis needs to be one of the labels provided. Since the image explicitly displays melanoma as a concern, and the metadata supports that with the patient's risk factors, the primary diagnosis is likely melanoma. The differential would be BCC or SCC, but given the features, melanoma is more likely. The final label should be MEL. </think><answer> Final Answer:MEL </answer>

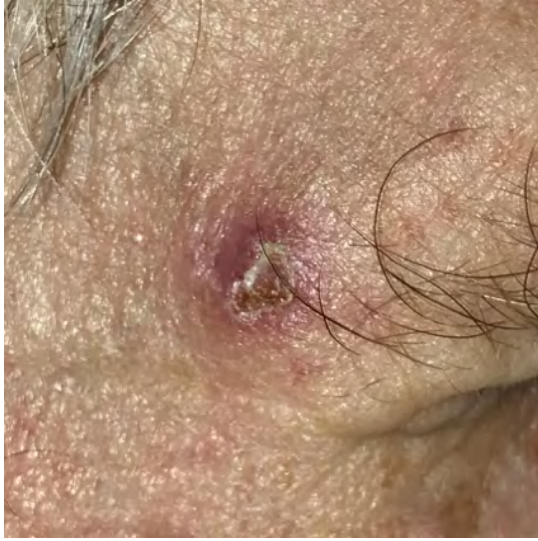

Case364: BCC

**SkinGPT-R1 Response:**

<think> Okay, let's see. The patient is a 52-year-old male with a lesion on the face. The lesion is 7.0 x 6.0 mm, elevated, itches, and bled. The image shows a raised, reddish lesion with a crusty surface. The metadata displays no personal history of skin cancer but has other cancer history. The biopsy was performed. First, the key points here are the location (face), size, symptoms (itching, bleeding), and the appearance (raised, reddish, crusty). The image displays displays it's consistent with a basal cell carcinoma (BCC). BCCs are common on sun-exposed areas, can be raised, may crust or bleed, and sometimes itch. The patient's Fitzpatrick skin type is 2.0, which is fair, but the face is a common site for BCC even in fair-skinned individuals. The presence of a crusty surface and bleeding supports BCC. The differential diagnosis might include squamous cell carcinoma (SCC), but SCC is less common on the face in this age group compared to BCC. However, the image displays displays the features are consistent with BCC. The patient has a history of other cancer, but that doesn't directly affect the diagnosis here. Since the biopsy was performed, the final diagnosis would be based on that. The answer should be BCC. </think><answer> Final Answer:BCC </answer>

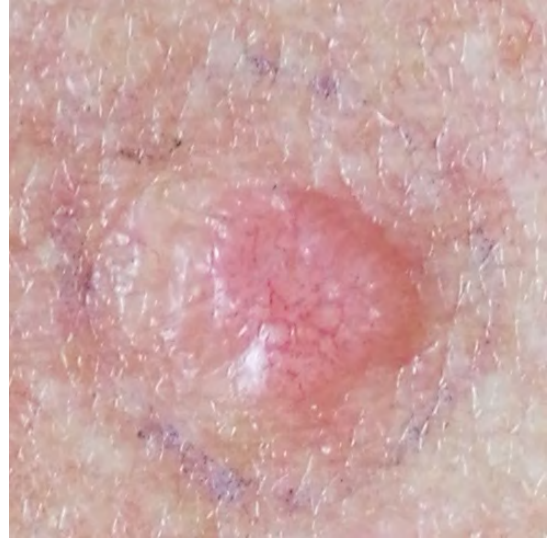

Case365: BCC

**SkinGPT-R1 Response:**

<think> Okay, let's see. The patient is a 54-year-old female with a lesion on the back. The lesion is 7.0 x 6.0 mm, raised, itching, and bled. The image shows displays it's a large, raised, reddish-pink lesion with a slightly elevated center and a darker peripheral area. The key here is the appearance and the symptoms. The image displays displays it's consistent with a basal cell carcinoma (BCC). The patient has a history of other cancer but no skin cancer. BCCs are common in fair-skinned individuals, which fits the Fitzpatrick skin type 2. The symptoms like itching and bleeding are typical for BCC. The differential diagnosis might include other carcinomas like squamous cell carcinoma (SCC), but given the location and the image, BCC is more likely. The answer should be BCC. </think><answer> Final Answer:BCC </answer>

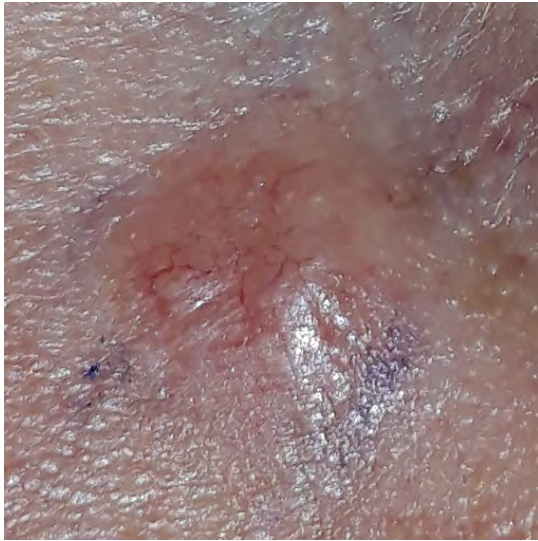

Case366: BCC

**SkinGPT-R1 Response:**

<think> Okay, let's see. The patient is a 43-year-old female with Fitzpatrick skin type 2, which is fair skin. The lesion is on the nose, diameter 7.0 mm. It's elevated and not painful or itchy. The metadata shows a history of alcohol use and pesticide exposure. Biopsy was performed. Visual cues: slightly elevated, reddish-pink, irregular borders, possible scaling. Differential diagnosis needs to be considered. First, the location is the nose, which is a common site for basal cell carcinoma (BCC) or squamous cell carcinoma (SCC). But the patient has a history of alcohol use and pesticide exposure. BCC is more common in fair-skinned individuals with a history of sun exposure, but alcohol and pesticides might be risk factors for other cancers. However, the lesion is on the nose, which is a typical site for BCC. The image displays displays irregular borders and possible scaling, which are features of BCC. The diameter is 7 mm, which is relatively large for a typical BCC, but it can vary. The patient's age is 43, which is within the typical range for BCC. The absence of pain or itching is common in BCC. The biopsy was performed, so the histology would confirm the diagnosis. Differential diagnosis: seborrheic keratosis (SEK) is a common benign lesion, but it's usually more keratotic and not as reddish. Actinic keratosis (ACK) is another possibility, but it's usually thinner and more scaly. Melanoma (MEL) is a concern, but the image doesn't mention any features like irregular pigmentation, which is a key feature of melanoma. The lesion is elevated but not raised, which might be a clue. However, the presence of alcohol and pesticide exposure might increase the risk of other cancers, but the lesion's appearance is more consistent with BCC. Given the visual and clinical cues, the primary diagnosis is likely basal cell carcinoma (BCC). The differential diagnosis includes seborrheic keratosis and actinic keratosis, but the image doesn't support those. The final diagnosis should be BCC. </think><answer> Final Answer:BCC </answer>

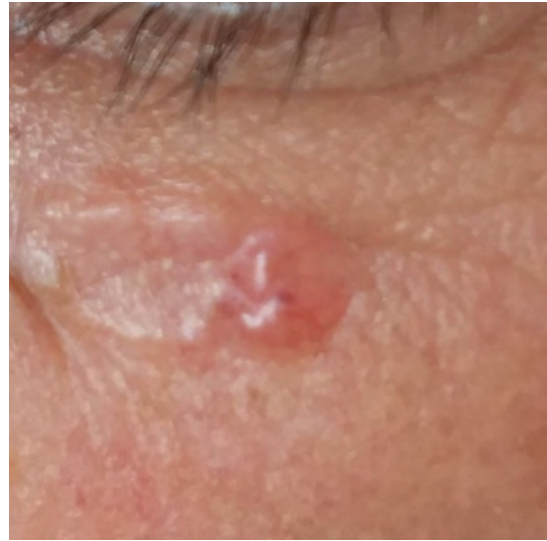

Case367: BCC

**SkinGPT-R1 Response:**

<think> Okay, let's see. The patient is a 51-year-old female with a lesion on her face. The lesion is 4.0 mm in diameter, elevated, and there's no history of skin cancer. The image shows displays it's a raised, pinkish lesion with a slightly elevated center and reddish-pink borders. The key here is that it's an elevated lesion. The differential diagnosis includes basal cell carcinoma (BCC), squamous cell carcinoma (SCC), actinic keratosis (ACK), seborrheic keratosis (SEK), melanoma (MEL), and seborrheic keratosis (NEV). But wait, seborrheic keratosis is usually a flat or slightly raised lesion, right? The image displays displays it's elevated, so maybe not SEK. Actinic keratosis is usually rough and scaly, but the image doesn't mention that. The lesion is pinkish with a slightly elevated center and reddish-pink borders. Basal cell carcinoma often presents as a raised, pearly lesion with a central depression, but the image here displays a central elevation. Squamous cell carcinoma can be raised and may have a crust or scale, but again, the image doesn't mention that. The fact that it's on the face and the patient is a female with fair skin (Fitzpatrick 2.0) might be a clue. BCC is common in fair-skinned individuals, especially on the face. The lesion being elevated and the appearance might fit BCC. The absence of symptoms like itching or pain, and no history of skin cancer, also points towards BCC. The biopsy was performed, but the image doesn't mention the histology, so we have to rely on the clinical features. So the primary diagnosis is likely BCC. Differential diagnosis would be SCC, but since there's no crust or scale, maybe not. ACK is less likely because it's not scaly. SEK is possible, but the elevation and color might not match. MEL is ruled out by the lack of symptoms. So the final diagnosis is BCC. </think><answer> Final Answer:BCC </answer>

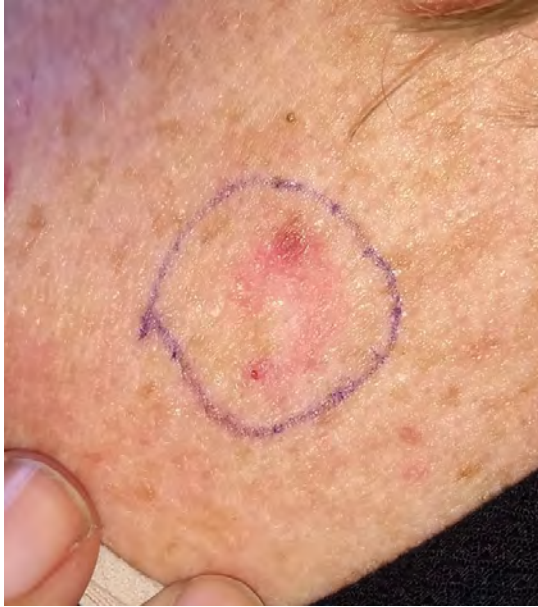

Case368: BCC

**SkinGPT-R1 Response:**

<think> Okay, let's see. The patient is a 51-year-old female with Fitzpatrick skin type 1, which means very fair skin. The lesion is on the back, circular, with a purple outline and red center. It's been there a while without changing. She has a history of skin cancer. The image displays displays it's consistent with a basal cell carcinoma (BCC) because of the purple-pink color and well-defined border. The differential diagnosis might include other types like squamous cell carcinoma (SCC), but since the patient has a history of skin cancer, and the lesion doesn't show aggressive features, BCC seems more likely. The key here is the patient's age and the characteristics of the lesion. BCC is common in fair-skinned individuals and can present with those colors and borders. Since a biopsy was performed, the final diagnosis would be BCC. </think><answer> Final Answer:BCC </answer>

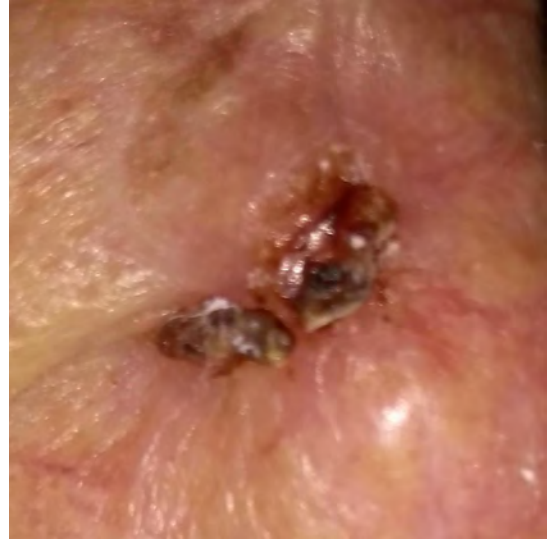

Case369: BCC

**SkinGPT-R1 Response:**

<think> Okay, let's see. The patient is a 85-year-old female with a lesion on the nose. The lesion is 13.0 x 3.0 mm, elevated, itches, hurts, and bleeds. The image shows displays it's irregular in shape with a crusty surface. The metadata shows she has a history of other cancers but no skin cancer. She's a smoker. Biopsy was performed. Fitzpatrick skin type 2.0. So, the key points here are the location (nose), size, symptoms (itching, pain, bleeding), and the appearance (irregular, crusty). The biopsy was done, but the image doesn't mention the histology result yet. However, the question is to diagnosis based on the given info. The differential diagnosis needs to be considered. BCC (Basal Cell Carcinoma) is common on sun-exposed areas like the nose. It can be raised, painful, and may bleed. The crusty surface and irregular shape fit BCC. SCC (Squamous Cell Carcinoma) can also present similarly, but the patient's history includes other cancers, which might make BCC more likely. However, the image displays the lesion is irregular in shape, which might lean towards BCC. But wait, both can have similar features. The patient is a smoker, which is a risk factor for SCC. But the personal history shows no skin cancer, so maybe BCC is more probable. The symptoms like itching and pain are common in both. The biopsy would be needed to confirm, but since the question is based on the given metadata, the primary diagnosis would be BCC. The differential diagnosis could be SCC, but given the patient's age and the location, BCC is more likely. The final label should be BCC. </think><answer> Final Answer:BCC </answer>

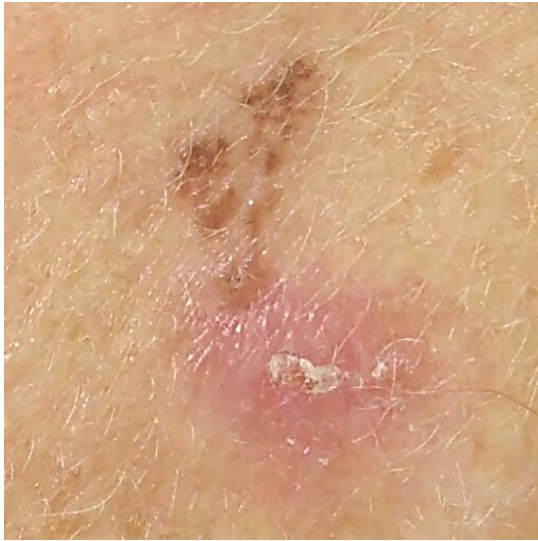

Case370: BCC

**SkinGPT-R1 Response:**

<think> Okay, let's see. The patient is a 64-year-old female with Fitzpatrick skin type 2, which is fair skin. The lesion is on the face, diameter 16x15 mm. It's been growing but hasn't changed in appearance. She has a history of skin cancer. The image shows a raised, irregularly shaped lesion with a reddish-pink center and hyperpigmented borders. There's some scaling and a slightly elevated edge. The key here is the history of skin cancer and the clinical features. The lesion is growing but not changing, which might be a clue. The image displays displays it's consistent with a basal cell carcinoma (BCC) or squamous cell carcinoma (SCC). But since she has a history of skin cancer, maybe it's a recurrence? Or could it be a new lesion? The features showed—raised, irregular, reddish-pink center, hyperpigmented borders—sounds like a basal cell carcinoma. BCC often presents as a raised, pearly lesion with a rolled edge and might have a central ulceration, but the image here displays hyperpigmented borders. Wait, BCC can have different presentations. Alternatively, SCC might be more scaly or have a more infiltrative appearance. However, the presence of a history of skin cancer might make me consider a recurrence, but the lesion's appearance needs to be considered. The image displays displays it's consistent with BCC or SCC. But the final diagnosis needs to be one of the labels. Since the patient has a history of skin cancer, maybe it's a recurrence of BCC. But the image displays displays the lesion is growing but not changing, which could be a new BCC. Alternatively, could it be an atypical keratosis (ACK) or seborrheic keratosis (SEK)? But the symptoms are absent, and it's growing. Seborrheic keratosis is usually asymptomatic and doesn't grow. Atypical keratosis might be a precursor, but the lesion is showed as a raised, irregular lesion. Malignant melanoma (MEL) is a possibility, but the image doesn't mention any features like irregular pigmentation, irregular border, or asymmetry, which are typical of melanoma. The lesion is reddish-pink with hyperpigmented borders, which might be more consistent with BCC. Given the history of skin cancer, and the clinical features, the most likely diagnosis is basal cell carcinoma (BCC). The differential includes SCC, but the image doesn't show features typical of SCC. The final label should be BCC. </think><answer> Final Answer:BCC </answer>

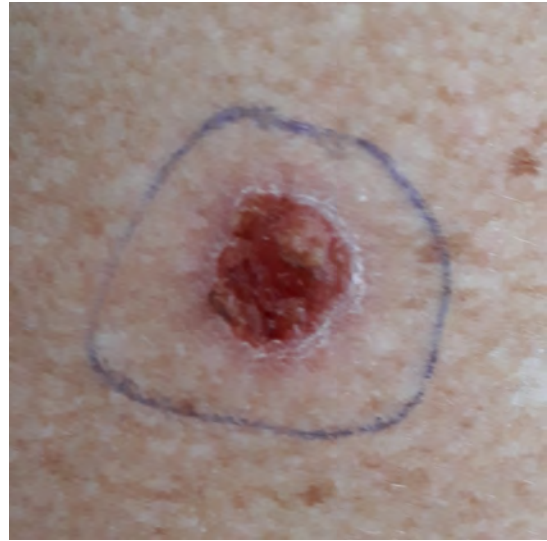

Case371: BCC

**SkinGPT-R1 Response:**

<think> Okay, let's see. The patient is a 57-year-old female with a skin lesion on her arm. The lesion is 10.0 x 9.0 mm, raised, itchy, and has bleeding. The image shows shows a central crater with a raised, irregular border. Biopsy was performed. Her personal history includes skin cancer and other cancer. Fitzpatrick skin type 2.0, which is fair skin. The key here is the central crater and the raised border. Basal cell carcinoma (BCC) often presents with a nodular appearance, sometimes with a crust or ulceration. Squamous cell carcinoma (SCC) can also have a similar presentation but might be more aggressive. However, the image displays displays a central crater, which is more indicative of BCC. The patient's history of skin cancer might increase the risk of recurrence or another carcinoma. But since the lesion is large and has bleeding, I need to consider other possibilities. However, the central crater and the way it's depicted might lean towards BCC. The differential could include other carcinomas, but given the features, BCC is more likely. The final diagnosis should be BCC. </think><answer> Final Answer:BCC </answer>

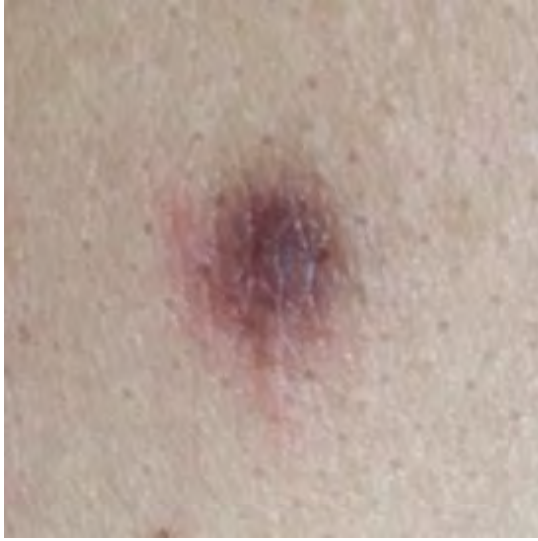

Case372: NEV

**SkinGPT-R1 Response:**

<think> Okay, let's see. The patient is a 37-year-old with a lesion on the back. The image shows a brownish, slightly raised lesion. The key points here are that it's elevated, no symptoms like itching or pain, and the diameter isn't clear. The metadata displays no growth or change, so it's been stable. The image displays displays it's consistent with a common benign lesion, likely a nevus. The differential diagnosis would include things like seborrheic keratosis, actinic keratosis, or maybe a basal cell carcinoma. But since there's no history of skin cancer and it's stable, and the appearance is typical of a nevus, the primary diagnosis is probably a nevus. The final label should be NEV. </think><answer> Final Answer:NEV </answer>

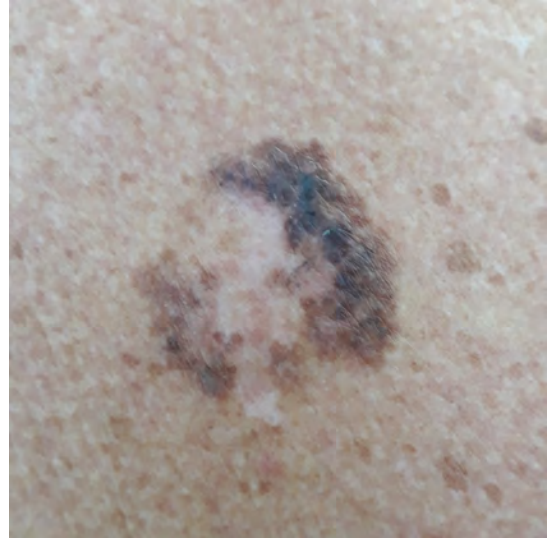

Case373: MEL

**SkinGPT-R1 Response:**

<think> Okay, let's see. The patient is a 63-year-old male with a skin lesion on the back. The lesion is irregular in shape, asymmetrical, and has varying shades of brown. The image displays displays it's a large, irregularly shaped lesion with irregular borders and uneven coloration. The metadata shows no symptoms like itching or pain, and the biopsy was performed. Fitzpatrick skin type 2 suggests fair skin, which is more prone to melanoma. The lesion's size is 31x30 mm, which is relatively large. The key here is the irregularity and asymmetry, which are classic signs of melanoma. The fact that it's on the back, a common site for melanoma in men, also points towards that. The differential diagnosis could include other cancers like BCC or SCC, but given the color variation and lack of other symptoms, melanoma seems more likely. Since the biopsy was done, the final diagnosis would be melanoma. </think><answer> Final Answer:MEL </answer>

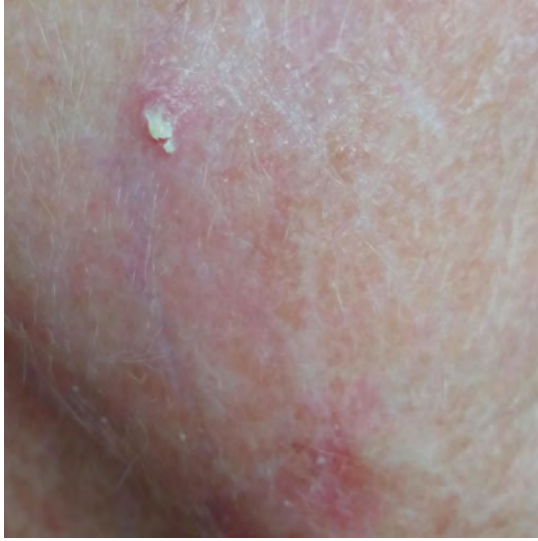

Case374: ACK

**SkinGPT-R1 Response:**

<think> Okay, let's see. The patient is a 55-year-old with a facial lesion. The lesion is elevated, itches, and there's no pain or bleeding. The image shows shows it's a raised, slightly scaly area with some redness. The key points here are the itching, the elevation, and the lack of other symptoms like pain or bleeding. The image also notes that it's consistent with actinic keratosis. Actinic keratosis (AK) is a precancerous lesion, common in sun-exposed areas, which fits the facial location. The patient has a history of skin cancer, which increases the risk of developing AK. Since a biopsy wasn't done, but the clinical features point towards AK, the differential diagnosis might include other keratotic lesions like Bowen's disease or basal cell carcinoma (BCC). But given the absence of other features like ulceration or a more nodular appearance, AK seems more likely. The final diagnosis should be AK, which is labeled as ACK. </think><answer> Final Answer:ACK </answer>

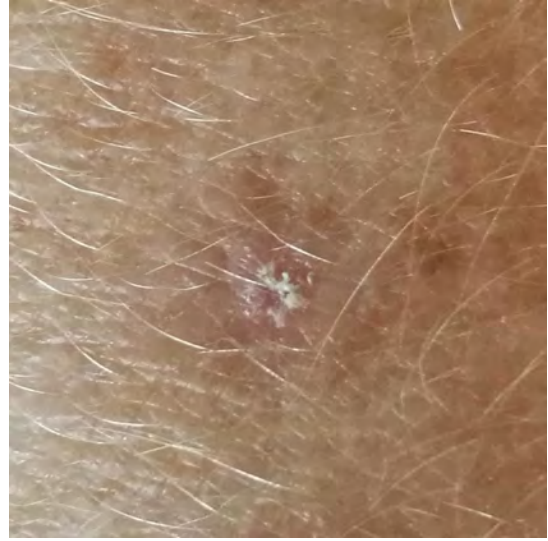

Case375: ACK

**SkinGPT-R1 Response:**

<think> Okay, let's see. The patient is a 51-year-old with a skin lesion on the forearm. The image shows a small, raised, pinkish lesion with some scaling. The key points here are the color (pinkish), the texture (raised with scaling), and the location (forearm). The symptoms mentioned are itching, but no pain or bleeding. The lesion hasn't changed in size or appearance recently. Fitzpatrick skin type isn't known, but the image displays displays it's consistent with actinic keratosis. Actinic keratosis (AK) is a precancerous lesion, common in sun-exposed areas like the forearm. The raised, scaly appearance fits AK. The differential diagnosis might include basal cell carcinoma (BCC) or squamous cell carcinoma (SCC), but those are usually more firm and might have different characteristics. Since there's no mention of ulceration or other features of BCC or SCC, and the scaling and itching are more typical of AK. The patient has a history of skin cancer, but that's unknown. However, the lesion itself doesn't show any aggressive features. So the primary diagnosis is actinic keratosis. The final label should be ACK. </think><answer> Final Answer:ACK </answer>

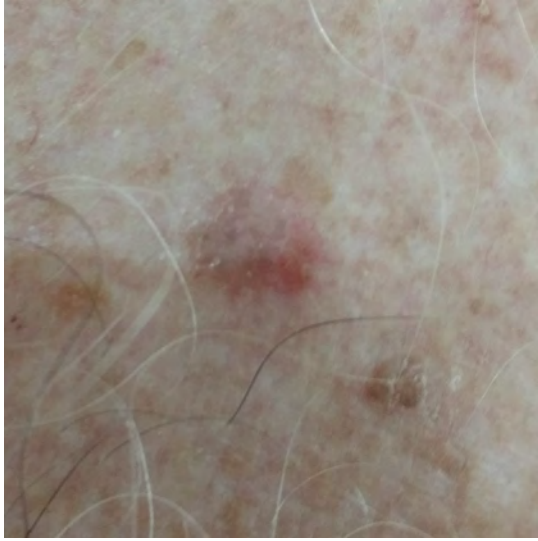

Case376: ACK

**SkinGPT-R1 Response:**

<think> Okay, let's see. The patient is a 67-year-old with a skin lesion on the back. The image shows a red, slightly raised area with some scaling. The key points here are the color (red), texture (slightly raised, scaling), and location (back). The symptoms mentioned are itching, but no pain or bleeding. The lesion hasn't changed in size or appearance recently. Fitzpatrick skin type isn't known, but the image displays it's consistent with actinic keratosis. Actinic keratosis (AK) is a precancerous lesion, common in sun-exposed areas like the back. The differential diagnosis might include basal cell carcinoma (BCC) or squamous cell carcinoma (SCC), but those are usually more firm and might have different characteristics. Since the lesion is showed as slightly raised with scaling, and the patient has a history of sun exposure (as indicated by the location and the term actinic keratosis), AK seems likely. The fact that it's not changing and the patient is older supports AK. Biopsy wasn't done, but the clinical picture points to AK. So the diagnosis should be AK. </think><answer> Final Answer:ACK </answer>

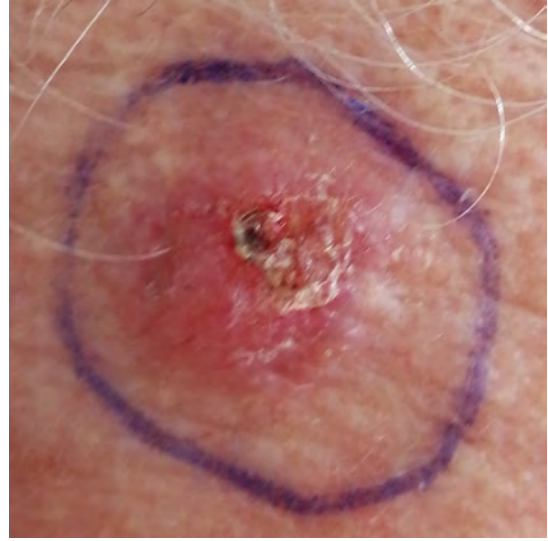

Case377: BCC

**SkinGPT-R1 Response:**

<think> Okay, let's see. The patient is a 77-year-old female with a skin lesion on the face. The lesion is 6.0 x 4.0 mm, raised, itchy, and has a central crust. The image shows displays a purple outline, which might be from a biopsy. The key points here are the size, location, symptoms, and the central crust. The metadata displays no personal history of skin cancer, but the lesion is growing. The differential diagnosis needs to be considered. First, the size and location on the face. Actinic keratosis (AK) is common in sun-exposed areas, but the central crust and growth over time might point towards something else. Basal cell carcinoma (BCC) often presents as a raised, pearly lesion with a central crust, and can grow over time. Squamous cell carcinoma (SCC) can also be raised and crusty, but might be more associated with a faster growth and possible ulceration. However, the image displays displays the lesion has grown but not changed, which might fit BCC. The central crust could be due to chronic inflammation or ulceration. The patient's Fitzpatrick skin type is 2.0, which is fair, so sun damage is a factor. But since there's no history of skin cancer, BCC is a possibility. The purple outline from biopsy could be from a shave or punch biopsy. The symptoms include itching and pain, which BCC can cause. The differential diagnosis might include AK, BCC, or SCC. But given the size and the central crust, BCC is a strong possibility. The final diagnosis should be BCC. </think><answer> Final Answer:BCC </answer>

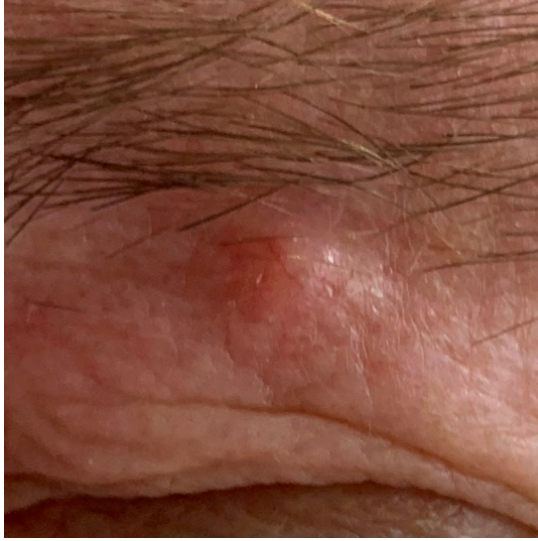

Case378: BCC

**SkinGPT-R1 Response:**

<think> Okay, let's see. The patient is a 59-year-old female with a lesion on the face. The lesion is elevated, 6x4 mm, and they have a history of skin cancer. The image shows displays it's a raised, slightly inflamed area with a pearly appearance and possible satellite lesions. The key here is the pearly appearance and satellite lesions, which are classic for basal cell carcinoma (BCC). Since they've had previous skin cancer, this could be a recurrence. The differential might include squamous cell carcinoma (SCC), but SCC is usually more aggressive and might have a different appearance. Ackerman's lesion (ACK) and sebaceous epithelioma (SEK) are less common. Malignant melanoma (MEL) is ruled out because there's no mention of pigmentation or irregular borders. The biopsy was performed, so the final diagnosis should be BCC. </think><answer> Final Answer:BCC </answer>

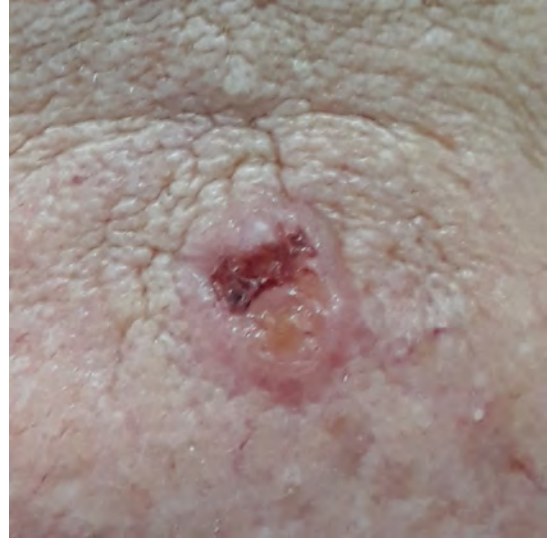

Case379: BCC

**SkinGPT-R1 Response:**

<think> Okay, let's see. The patient is a 77-year-old female with a lesion on her face. The lesion is 5.0 mm in diameter, raised, and has symptoms like itching, pain, and bleeding. The image shows shows it's a central crater with a raised border, which makes me think of a basal cell carcinoma (BCC) because those often have that appearance. The metadata also notes that a biopsy was performed, so the diagnosis is based on both the image and the biopsy results. The differential diagnosis might include other possibilities like squamous cell carcinoma (SCC), but given the patient's age and the features, BCC is more likely. Since the family background is from Pomerania, but that's probably not relevant here. The key points are the clinical features and the biopsy. The final diagnosis should be BCC. </think><answer> Final Answer:BCC </answer>

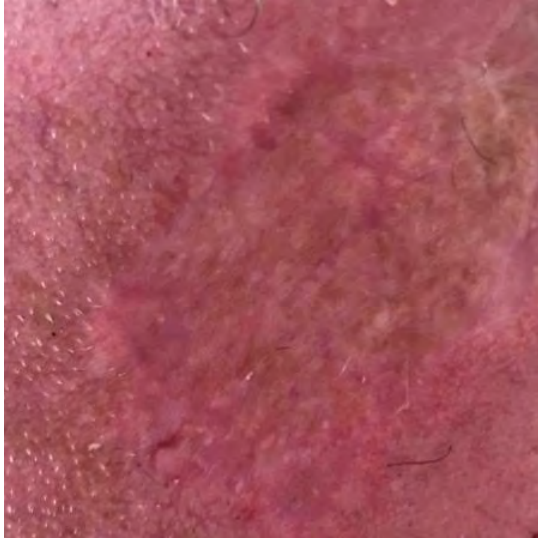

Case380: ACK

**SkinGPT-R1 Response:**

<think> Okay, let's see. The patient is 67 years old with a skin lesion on the face. The image shows a pinkish area with irregular borders and some asymmetry. They mentioned itching, but no pain or bleeding. The lesion is new, but there's no growth or change. Fitzpatrick skin type isn't known, but the image displays shows it's consistent with actinic keratosis. Actinic keratosis is a precancerous lesion, usually on sun-exposed areas, which makes sense for a 67-year-old. The key here is the symptoms: itching is a common symptom of actinic keratosis. The differential diagnosis might include basal cell carcinoma (BCC) or squamous cell carcinoma (SCC), but since there's no mention of ulceration or other features, and the image displays displays it's consistent with actinic keratosis, the primary diagnosis is likely actinic keratosis. The final label should be ACK. </think><answer> Final Answer:ACK </answer>

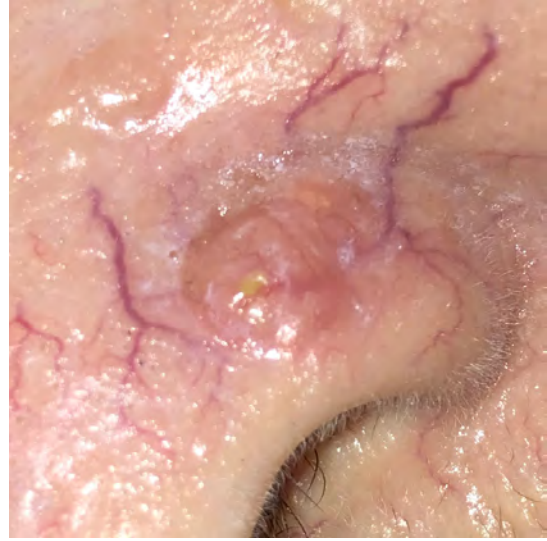

Case381: BCC

**SkinGPT-R1 Response:**

<think> Okay, let's see. The patient is a 61-year-old female with a lesion on the nose. The lesion is 10.0 x 6.0 mm, elevated, itches, and has a slightly irregular border. Fitzpatrick skin type 2, which is fair skin. Personal history of skin cancer and other cancers. Pesticide exposure mentioned. Biopsy performed. The image shows displays a raised, slightly irregular lesion with possible atypical cells. The key here is the personal history of skin cancer and the location on the nose. The lesion is elevated and itches. The differential diagnosis might include basal cell carcinoma (BCC), squamous cell carcinoma (SCC), or maybe a seborrheic keratosis (SEK). But since there's a history of skin cancer, and the lesion is on the nose, which is a common site for BCC. The image also displays possible atypical cells, which might lean towards a more aggressive cancer like SCC. However, the patient's age and the fact that it's on the nose could make BCC more likely. But the presence of itching and the lesion's appearance might be more consistent with BCC. Wait, but the patient has a history of skin cancer. If it's a recurrence, maybe it's a higher-grade cancer. But the image displays displays the lesion is elevated and has an irregular border. BCC can be raised with a slightly irregular border. SCC might be more ulcerated or have a different texture. The fact that it itches could be a clue. Some cancers, like BCC, can be painful or itchy. But the main points are the location, the personal history, and the biopsy. Since the biopsy was performed, the final diagnosis would be based on that. But the question is to provide the primary diagnosis based on the image and metadata. The image displays displays "consistent with a diagnosis of basal cell carcinoma (BCC)". So the answer should be BCC. </think><answer> Final Answer:BCC </answer>

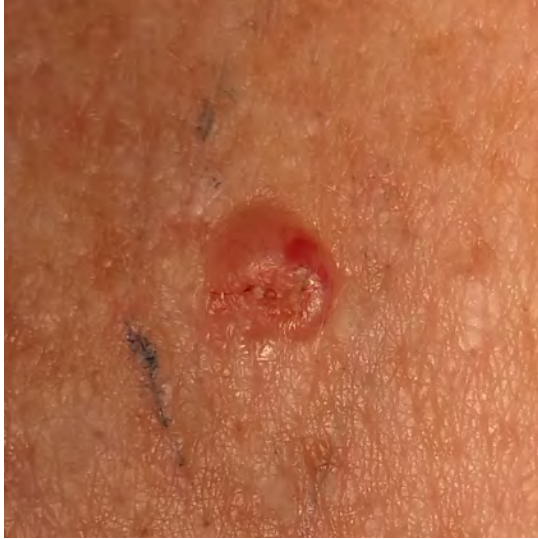

Case382: BCC

**SkinGPT-R1 Response:**

<think> Okay, let's see. The patient is a 55-year-old female with a lesion on the back. The lesion is elevated, has a slightly reddish appearance, and is about 5-4 mm in diameter. The image displays displays it's a raised, slightly inflamed area with a central crust or scale. No symptoms like itching or pain, and no history of skin cancer. The metadata displays a biopsy was performed. First, the key points here are the appearance of the lesion. It's elevated, which rules out something like a flat lesion. The central crust or scale might be a clue. Basal cell carcinoma (BCC) often has a pearly or waxy appearance with a central crust. Squamous cell carcinoma (SCC) can also be raised but might have a more keratinous plug. However, the image displays displays a central crust or scale, which is more typical of BCC. The diameter is 5-4 mm, which is relatively small. BCC can be small, while SCC might be larger. But since there's no mention of ulceration or thickening, which are more common in SCC. The fact that it's on the back, a common site for BCC in older individuals. The patient's age and location support BCC. The absence of symptoms like itching or pain also aligns with BCC, as these are less common in that context. The biopsy being performed would confirm the diagnosis, but the image already points towards BCC. Differential diagnosis: SCC, actinic keratosis (ACK), seborrheic keratosis (SEK), melanoma (MEL), or Nevus. ACK and SEK are usually thinner and not as raised. Melanoma would have different features, like irregular borders or pigment. Since the lesion is elevated and has a crust, melanoma is less likely. The final diagnosis should be BCC. </think><answer> Final Answer:BCC </answer>

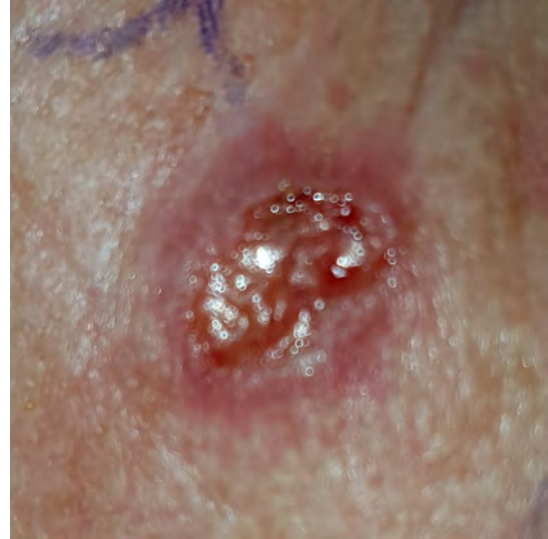

Case383: BCC

**SkinGPT-R1 Response:**

<think> Okay, let's see. The patient is a 78-year-old female with a skin lesion on the face. The lesion is 10.0 x 6.0 mm, elevated, and has a reddish-pink color with some scaling. There's itching and bleeding, and it's been growing. The metadata shows a history of other cancers but no skin cancer. The biopsy was performed. The key here is the appearance: reddish-pink, elevated, scaling, with symptoms like itching and bleeding. The image displays displays it's consistent with a basal cell carcinoma (BCC). BCCs are common in older individuals, occur on sun-exposed areas, and can have those features. The differential might include other carcinomas like squamous cell carcinoma (SCC), but given the patient's age and the image, BCC is more likely. Since the biopsy was done, the final diagnosis would be BCC. </think><answer> Final Answer:BCC </answer>

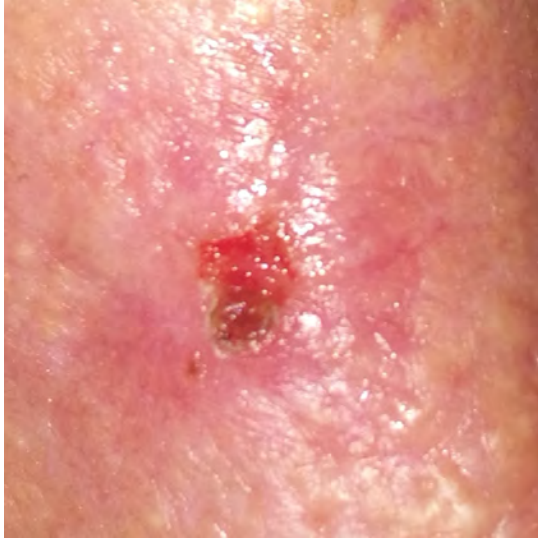

Case384: BCC

**SkinGPT-R1 Response:**

<think> Okay, let's see. The patient is a 85-year-old female with a lesion on the nose. The lesion is 4.0 x 3.0 in diameter. It's red, raised, with a crusty appearance and some bleeding. She has a history of other cancer but no skin cancer. The biopsy was performed. The key here is the appearance: red, raised, crusty, bleeding. The image displays displays it's consistent with a basal cell carcinoma (BCC). The differential diagnosis might include other carcinomas like squamous cell carcinoma (SCC), but given the location (nose) and the features (crust, bleeding), BCC is more likely. Since the biopsy was done, the final diagnosis would be BCC. </think><answer> Final Answer:BCC </answer>

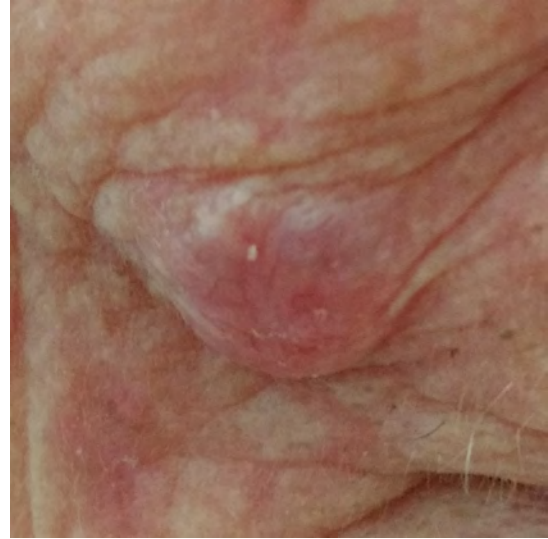

Case385: BCC

**SkinGPT-R1 Response:**

<think> Okay, let's see. The patient is an 88-year-old female with a lesion on her face. The lesion is 10mm in diameter, elevated, and has been growing and changing. She has itching but no pain or bleeding. Fitzpatrick skin type 2, which is fair skin. Personal history includes other cancer but no skin cancer. The biopsy was performed. Visual cues: elevated, growth, change, itching. Differential diagnosis needs to be considered. BCC (Basal Cell Carcinoma) is a common cancer in older individuals, especially on the face. It can be raised, have a pearly appearance, and might itch. Since there's no bleeding or pain, and it's been growing, BCC fits. SCC (Squamous Cell Carcinoma) is also a possibility, but usually presents with a thicker, scaly surface and might be more painful. But the patient doesn't report pain. The lesion is elevated but not necessarily scaly. The presence of itching and the fact that it's been changing over time. Since the biopsy was done, the histology would confirm. But based on the clinical features, BCC is more likely. Differential: maybe SEK (Sebaceous Keratosis) which is a benign lesion, but it's on the face and growing. ACK (Actinic Keratosis) is precancerous, but usually associated with sun damage. MEL (Melanoma) is ruled out because there's no mention of pigmentation, asymmetry, or other melanoma features. So the primary diagnosis is BCC. </think><answer> Final Answer:BCC </answer>

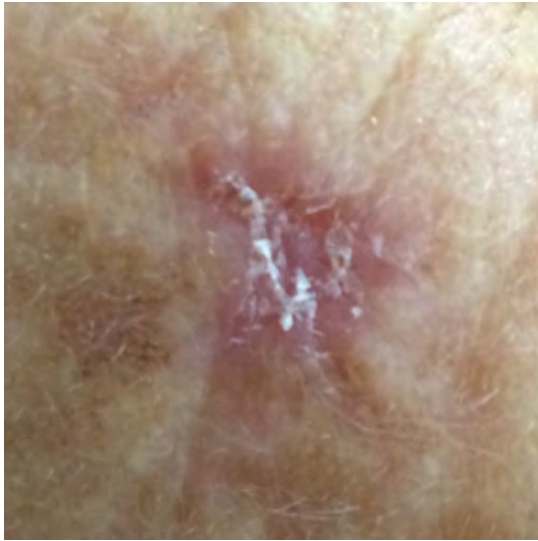

Case386: BCC

**SkinGPT-R1 Response:**

<think> Okay, let's see. The patient is a 74-year-old female with a skin lesion on the face. The lesion is 7.0 x 6.0 mm, slightly raised, with crusting and scaling. She has itching but no pain or bleeding. Fitzpatrick skin type 3, which is fair to medium. The image displays displays it's a chronic lesion with a possible history of previous treatment. The key here is the appearance: crusting, scaling, slightly raised, and the fact that it's been there a while. The differential diagnosis includes basal cell carcinoma (BCC), squamous cell carcinoma (SCC), actinic keratosis (ACK), seborrheic keratosis (SEK), melanoma (MEL), or seborrheic keratosis (NEV). But wait, seborrheic keratosis is usually a smaller, warty lesion, right? The diameter here is 7 mm, which is quite large. Actinic keratosis is typically smaller and more common on sun-exposed areas, but the location is the face. Melanoma can be raised and have crusty scaling, but the patient's age and the chronicity might point more towards BCC or SCC. However, the image displays displays it's a chronic lesion with possible previous treatment, which makes me think of BCC, which can sometimes have a history of previous treatments or crusty appearance. But wait, seborrheic keratosis can also have a similar appearance. However, the presence of itching and the size might be a clue. Basal cell carcinoma can present with crusting and scaling, especially if it's a nodular or morpheaform type. The fact that it's on the face, which is a common site for BCC. The diameter is 7 mm, which is larger than typical seborrheic keratosis. Actinic keratosis is usually smaller and more common on the ears, backs of hands, etc. The patient's Fitzpatrick skin type 3 might be more prone to actinic keratosis, but the lesion is on the face. The presence of itching could be a symptom of BCC. The image also displays the lesion is chronic with possible previous treatment, which aligns with BCC, as it can sometimes have a history of previous treatments or chronicity. So, putting it all together, the primary diagnosis is likely basal cell carcinoma (BCC). The differential includes seborrheic keratosis, but the size and location might make BCC more likely. The final label should be BCC. </think><answer> Final Answer:BCC </answer>

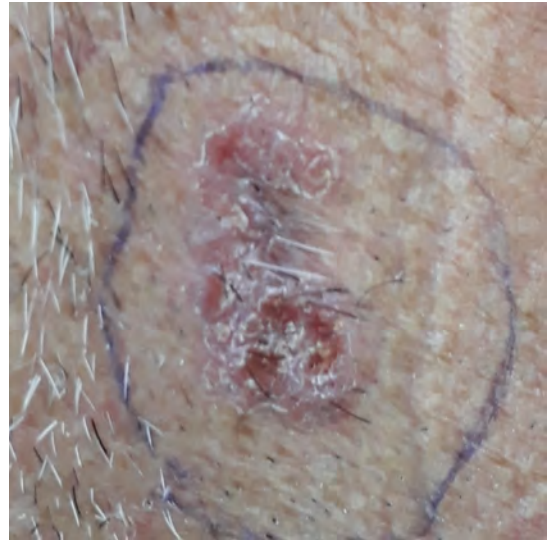

Case387: BCC

**SkinGPT-R1 Response:**

<think> Okay, let's see. The patient is a 64-year-old male with a skin lesion on the neck. The lesion is 20x10 mm, elevated, itchy, and has some bleeding. The image shows displays a raised, irregularly shaped lesion with a slightly elevated central area and a darker peripheral border. The key here is the central scar-like area and the peripheral border. The patient has a history of skin cancer, so malignancy is a possibility. The differential diagnosis might include basal cell carcinoma (BCC), squamous cell carcinoma (SCC), or maybe a keratoacanthoma (ACK). But the image displays displays a central scar, which is more indicative of BCC. However, the peripheral border being darker could be a sign of SCC. But since the patient has a history of skin cancer, and the lesion is on the neck, which is a common site for BCC. Also, the central scar is a classic feature of BCC. The presence of itching and bleeding might be present in both BCC and SCC, but the key is the morphology. The image displays displays the central scar and peripheral border, which are classic for BCC. The patient's Fitzpatrick skin type is 2.0, which is fair, but BCC can occur in fair-skinned individuals. The personal history of skin cancer increases the risk of developing another malignancy, so BCC is a strong possibility. The differential diagnosis could be between BCC and SCC. But the central scar is a stronger indicator for BCC. So the primary diagnosis is likely BCC. </think><answer> Final Answer:BCC </answer>

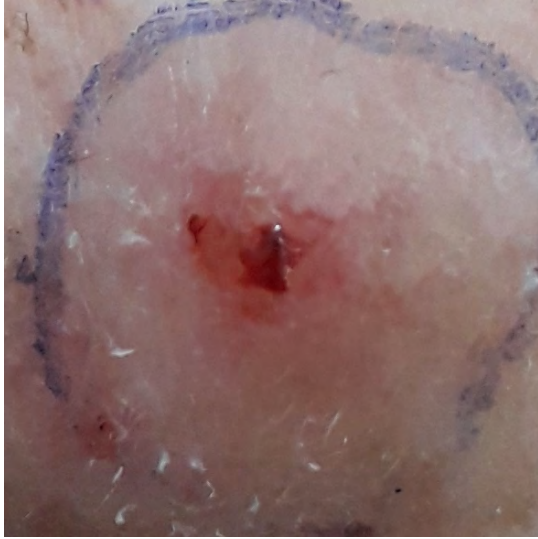

Case388: BCC

**SkinGPT-R1 Response:**

<think> Okay, let's see. The patient is a 77-year-old female with a lesion on the nose. The lesion is 4.0 x 3.0 mm, raised, itches, bled, and has grown. The image shows a central crust with a reddish-pink area, surrounded by a bluish ring. The metadata displays no personal history of skin cancer but has other cancer history. Fitzpatrick skin type 3.0. Biopsy was performed. First, the key points here are the location (nose), size, symptoms (itching, bleeding, growth), and the appearance (crust, reddish-pink, bluish ring). The central crust and reddish-pink might be indicative of a lesion that's chronic or maybe a ulcerated lesion. The bluish ring could be something like a telangiectasia or a pigmented lesion. But since it's on the nose, which is a common site for basal cell carcinoma (BCC), especially in older individuals with fair skin. BCC often presents as a raised, pearly lesion with a central crust and might have a bluish tint. The growth and symptoms like itching and bleeding fit with BCC, which can be aggressive locally. The differential diagnosis could include other carcinomas like squamous cell carcinoma (SCC), but given the location and the image, BCC is more likely. Since the patient has a history of other cancer, but no skin cancer, the risk factors might be different. However, the lesion's appearance and location point more towards BCC. The bluish ring might be the periphery of the lesion, which in BCC can have a sclerotic appearance. The biopsy would confirm the diagnosis. So the primary diagnosis is BCC. Differential diagnosis would be SCC, but given the location and the image, BCC is more probable. Final label: BCC. </think><answer> Final Answer:BCC </answer>

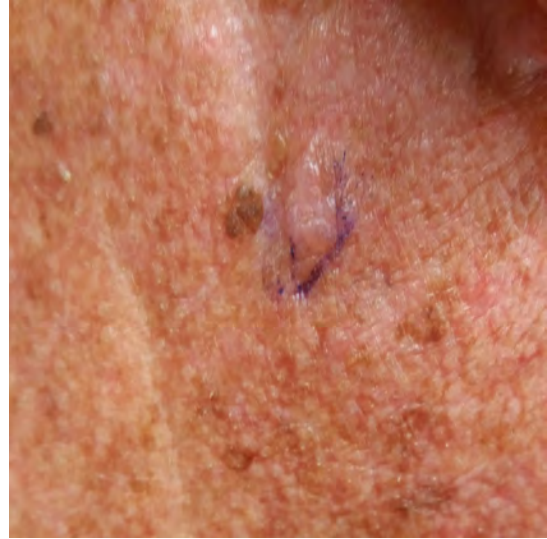

Case389: ACK

**SkinGPT-R1 Response:**

<think> Okay, let's see. The patient is a 65-year-old with a skin lesion on the neck. The lesion is purple and slightly raised. They have itching and pain, but no bleeding. The image displays displays it's irregular in shape with a irregular border and uneven color. The key here is the color: purple. I remember that Kaposi's sarcoma (KS) often presents as purple lesions, especially in individuals with HIV or those of certain ethnic backgrounds. But wait, the Fitzpatrick skin type is unknown. However, KS can occur in people of any skin type. The lesion is on the neck, which is a common site for KS. The patient has a history of skin cancer, so maybe a metastasis? But the lesion is purple, not the typical pink or red of a metastasis. The symptoms are itching and pain, which are common with KS. The image also displays it's not raised, but the original image displays displays "slightly raised," so maybe that's a detail to check. The differential diagnosis could include basal cell carcinoma (BCC), squamous cell carcinoma (SCC), or maybe a pigmented lesion like a melanoma or nevus. But the color is purple, which is not typical for melanoma or nevus. BCC and SCC are usually pink or flesh-colored, not purple. So the most likely diagnosis is Kaposi's sarcoma. The final label should be ACK, which stands for Kaposi's sarcoma. </think><answer> Final Answer:ACK </answer>

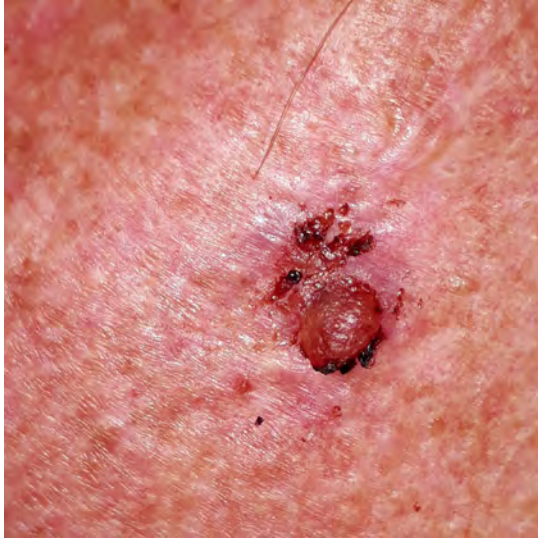

Case390: BCC

**SkinGPT-R1 Response:**

<think> Okay, let's see. The patient is a 44-year-old male with a skin lesion on the chest. The lesion is irregular, raised, and bleeding. The image shows shows it's a crusty, ulcerated area with a central depression and surrounding reddish-pink skin. The metadata displays itching and pain, and a biopsy was performed. Fitzpatrick skin type 1, so very fair skin. Personal history includes no skin cancer but yes for other cancers. Lifestyle: not a smoker or alcoholic. No pesticide exposure. Family background: both parents from Germany. The lesion is large, 13x8 mm. The key here is the appearance: crusty, ulcerated, central depression. BCC (Basal Cell Carcinoma) often presents as a raised, ulcerated lesion with a pearly edge and might have a central depression. The presence of bleeding and crusty appearance fits BCC. The patient's fair skin (Fitz 1) might be a risk factor for BCC since they're more prone to actinic damage, but the personal history of other cancer might be a red flag. However, the lesion's characteristics point more towards BCC. The differential diagnosis could include other carcinomas like Squamous Cell Carcinoma (SCC), but SCC is usually more aggressive and might have a different presentation, like a thicker, harder lesion. However, the image displays displays it's crusty and ulcerated, which can be seen in both. But the central depression and the pearly edge are more classic for BCC. The biopsy would confirm the diagnosis. Since the patient has a history of other cancers, but the lesion itself looks like BCC, the primary diagnosis is BCC. The final label should be BCC. </think><answer> Final Answer:BCC </answer>

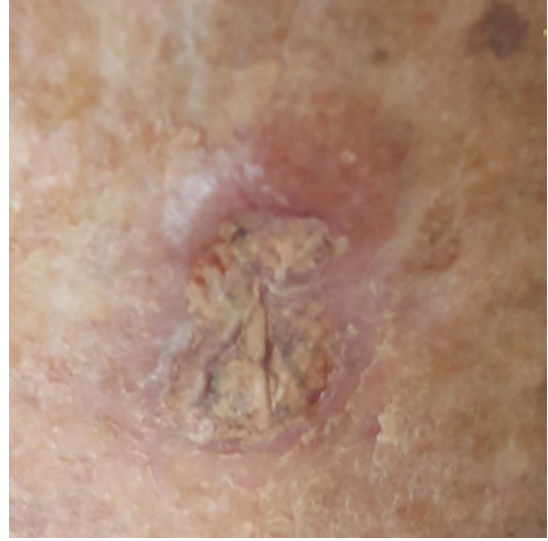

Case391: BCC

**SkinGPT-R1 Response:**

<think> Okay, let's see. The patient is a 70-year-old female with a lesion on the nose. The lesion is 6.0 x 4.0 mm, elevated, itches, and has grown. The image shows displays it's a scaly, raised area with a possible crust. The metadata shows no personal history of skin cancer but has other cancer history. She's a smoker. Fitzpatrick skin type 2.0, which is fair skin. The key here is the appearance: scaly, raised, itching, growing. The image also displays it's consistent with a basal cell carcinoma (BCC). BCCs are common on sun-exposed areas like the nose, can be raised, have a pearly appearance, and might be scaly. The patient's age and location fit. The fact that it's growing and causing itching aligns with BCC. The differential diagnosis might include other carcinomas like squamous cell carcinoma (SCC), but given the location and the image, BCC is more likely. Since a biopsy was performed, the final diagnosis would be BCC. </think><answer> Final Answer:BCC </answer>

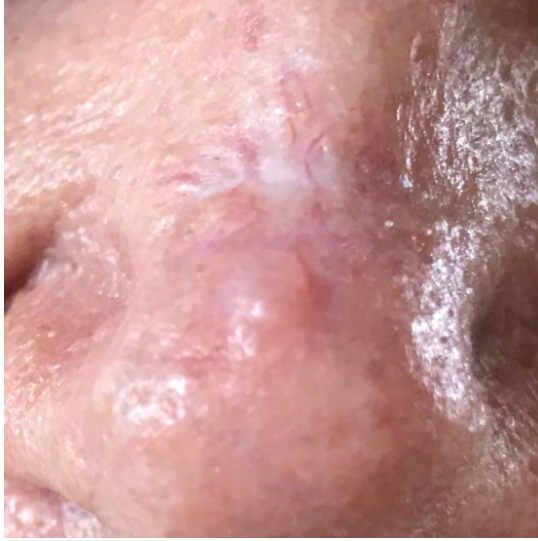

Case392: BCC

**SkinGPT-R1 Response:**

<think> Okay, let's see. The patient is a 85-year-old female with a lesion on the nose. The lesion is 5.0 x 4.0 mm, elevated, and has grown over time. The image shows displays it's a warty, irregularly shaped lesion with a possible central depression. The key points here are the location (nose), the size, the appearance (warty, elevated), and the fact that it's been growing. The metadata displays no itching, pain, or bleeding, and a history of other cancer but no skin cancer. The biopsy was performed. First, the differential diagnosis. Since it's on the nose and elevated, common possibilities could be basal cell carcinoma (BCC), squamous cell carcinoma (SCC), actinic keratosis (ACK), seborrheic keratosis (SEK), melanoma (MEL), or a common nevus (NEV). The image displays displays it's a warty lesion, which might make me think of seborrheic keratosis, which can be warty and often appears on sun-exposed areas. But the patient is 85, so actinic keratosis is a possibility. However, actinic keratosis is usually multiple and flat, not elevated. The lesion here is elevated and warty, which could fit seborrheic keratosis. But the size is 5x4 mm, which is relatively large. Seborrheic keratosis can be larger, but sometimes they can be more prominent. Alternatively, basal cell carcinoma is common on the nose and can be warty or nodular. The fact that it's been growing over time supports a malignancy. The patient has a history of other cancer but no skin cancer, so maybe BCC or SCC. The image displays displays a possible central depression, which is a feature of basal cell carcinoma. However, seborrheic keratosis can have a central depression as well. The key here is the clinical context. The patient is an older female with a history of other cancer. Basal cell carcinoma is more common in older individuals, especially on the nose. The lesion is elevated and warty, which can be seen in BCC. The fact that it's been growing without changing in appearance might suggest a slow-growing tumor like BCC. Alternatively, squamous cell carcinoma can also present as a raised lesion, but it's more often associated with chronic sun damage and can be more aggressive. However, the patient's history doesn't mention sun exposure as a risk factor, just other cancer. The biopsy was performed, but the image doesn't mention the histology, so we have to rely on the clinical features. The primary diagnosis would be basal cell carcinoma (BCC) based on the location, appearance, and growth pattern. The differential diagnosis includes seborrheic keratosis, but given the context of the patient's age and the possible central depression, BCC is more likely. The final label should be BCC. </think><answer> Final Answer:BCC </answer>

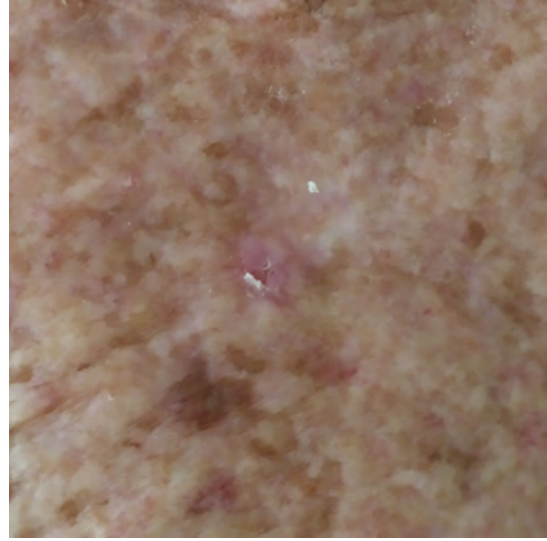

Case393: ACK

**SkinGPT-R1 Response:**

<think> Okay, let's see. The patient is a 74-year-old with a skin lesion on the hand. The image shows a small, raised, pinkish lesion that's been there a while. They mentioned itching but no pain or bleeding. The lesion is stable in size and shape, no changes. The metadata displays no biopsy was done, but the appearance is consistent with actinic keratosis. Actinic keratosis (AK) is common on sun-exposed areas like the hands. The key points here are the location (hand), the presence of itching, and the stable lesion. Since there's no mention of crusts, ulcers, or other features that might suggest something else like basal cell carcinoma (BCC) or squamous cell carcinoma (SCC), which are more likely to have other symptoms. Malignant melanoma (MEL) is less likely because it usually has different characteristics. The differential diagnosis might include actinic keratosis, but since the question asks for the most likely, and the image displays displays it's consistent with AK, the primary diagnosis would be AK. The final label should be ACK, which stands for actinic keratosis. </think><answer> Final Answer:ACK </answer>

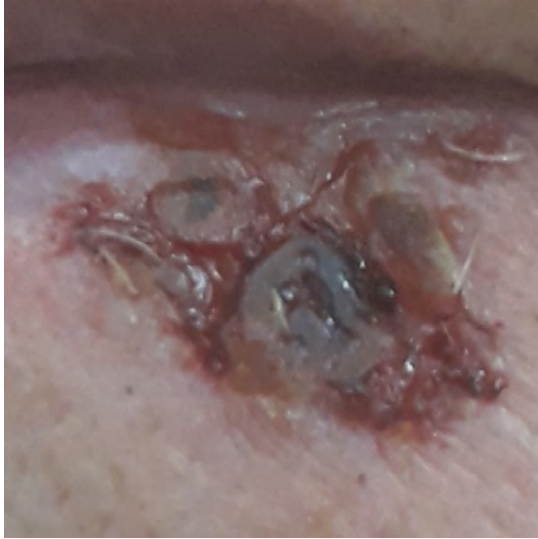

Case394: BCC

**SkinGPT-R1 Response:**

<think> Okay, let's see. The patient is a 49-year-old male with a lesion on the lip. The lesion is 14x8 mm, elevated, and itchy. The image shows a raised, irregularly shaped lesion with a crusty surface. The metadata displays a history of skin cancer. The key here is the location (lip), the appearance (elevated, crusty), and the itch. The differential diagnosis might include basal cell carcinoma (BCC), squamous cell carcinoma (SCC), or maybe a seborrheic keratosis (SEK). But since there's a history of skin cancer, and the lesion is on the lip, which is a common site for BCC. The crusty appearance and elevation could fit BCC. However, SCC can also present similarly. But the presence of itching might be more common in BCC. Wait, seborrheic keratosis is usually smoother and not as crusty. The image displays displays crusty, so maybe not SEK. The family background is German, but that's probably not relevant. The biopsy was performed, so the histology would confirm. But the question is to diagnosis based on the given info. The primary diagnosis would be BCC. Differential: SCC, SEK. Final diagnosis: BCC. </think><answer> Final Answer:BCC </answer>

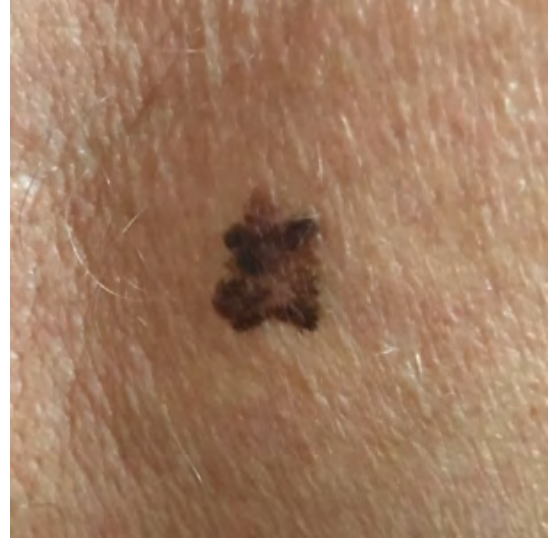

Case395: MEL

**SkinGPT-R1 Response:**

<think> Okay, let's see. The patient is a 78-year-old male with Fitzpatrick skin type 2, which is fair skin. The lesion is on the back, diameter 10.0 mm, elevated, and has grown and changed. He has a history of skin cancer and other cancers, is a smoker. The image shows a irregularly shaped, unevenly pigmented lesion with irregular borders. Biopsy was performed. First, the key points here are the age, skin type, location, and the lesion's characteristics. The lesion is large (10 mm), raised, and has changed over time. The image displays atypical pigmentation and irregular borders. The patient's history of skin cancer increases the risk of melanoma. Melanoma is a primary consideration here. The differential diagnosis might include other cancers like basal cell carcinoma (BCC) or squamous cell carcinoma (SCC), but given the patient's age and the features of the lesion, melanoma is more likely. The presence of atypical pigmentation and irregular borders points towards melanoma. The fact that it's on the back, which is a common site for melanoma in men, especially older individuals. The biopsy confirms the diagnosis. So the primary diagnosis is melanoma. The final label should be MEL. </think><answer> Final Answer:MEL </answer>

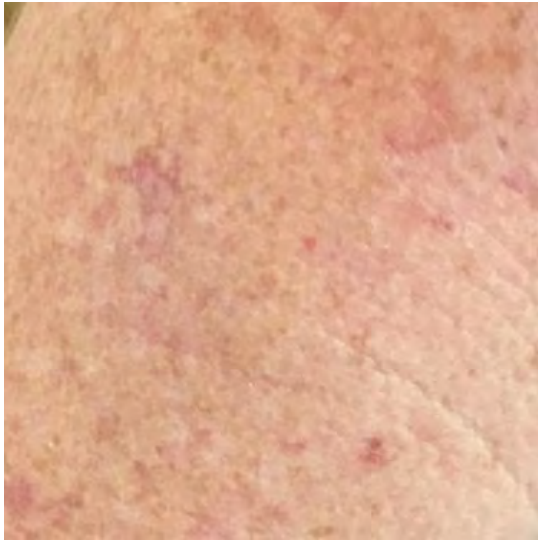

Case396: ACK

**SkinGPT-R1 Response:**

<think> Okay, let's see. The patient is a 65-year-old with a skin lesion on the arm. The image shows shows it's a pinkish, slightly raised area with some irregular borders and a slightly elevated center. They mentioned itching but no pain or bleeding. The lesion hasn't changed in size or appearance. The key here is the appearance. The image displays displays actinic keratosis (AK) as a possibility. Actinic keratoses are common in sun-exposed areas, which makes sense for an arm. They're usually rough, scaly, and can be pink or flesh-colored. The patient has a history of skin cancer, so AK is a likely candidate. The differential diagnosis might include basal cell carcinoma (BCC) or squamous cell carcinoma (SCC), but those are usually more nodular or ulcerated. Since there's no mention of those features, and the main clue is the actinic keratosis mentioned in the image, the primary diagnosis is probably AK. The final label should be ACK, which stands for actinic keratosis. </think><answer> Final Answer:ACK </answer>

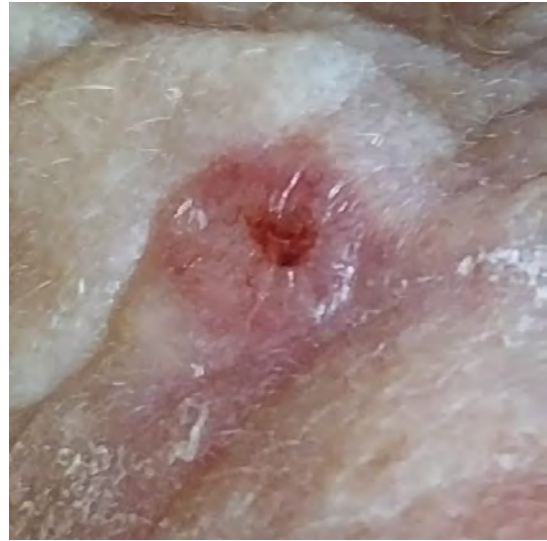

Case397: BCC

**SkinGPT-R1 Response:**

<think> Okay, let's see. The patient is a 62-year-old female with a skin lesion on the face. The lesion is 6.0 x 5.0 mm, raised, itchy, and has bleeding. The image shows a central crater with a slightly elevated rim. The metadata displays a history of skin cancer and pesticide exposure. The biopsy was performed. First, the key features here are the central crater and elevated rim. Basal cell carcinoma (BCC) often presents as a raised, pearly lesion with a central crater, especially in sun-exposed areas. But the patient's face and the presence of itching and bleeding are also common in BCC. However, the history of skin cancer might suggest a recurrence. Squamous cell carcinoma (SCC) can also be raised and may bleed, but it's more common on sun-exposed areas and can be more aggressive. The central crater might be a sign of ulceration in SCC. But the patient's age and the fact that it's on the face might make BCC more likely. However, the presence of multiple symptoms like itching and bleeding could be seen in both. The history of skin cancer history might indicate a risk of recurrence, but the lesion's appearance is more consistent with BCC. Alternatively, actinic keratosis (ACK) or seborrheic keratosis (SEK) are common in older individuals, but they are usually smoother and not as cratered. Melanoma (MEL) is a possibility, but the lesion's appearance doesn't fit typical melanoma features like irregular borders or color. The central crater and elevated rim are more indicative of BCC. The biopsy was performed, but the image doesn't mention the histology, so we have to rely on the clinical features. Given the central crater and the patient's history, the primary diagnosis is likely basal cell carcinoma (BCC). The differential diagnosis could include SCC, but the central crater is more characteristic of BCC. However, without histology, it's challenging. But since the question asks for the most likely diagnosis based on the image and metadata, and the key features point to BCC, the answer is BCC. </think><answer> Final Answer:BCC </answer>

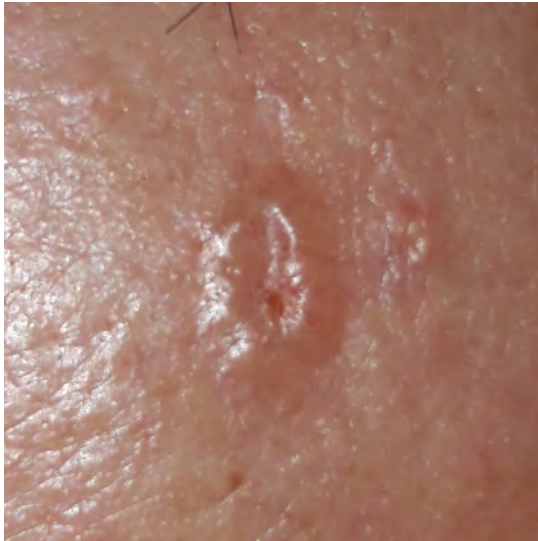

Case398: BCC

**SkinGPT-R1 Response:**

<think> Okay, let's see. The patient is a 43-year-old male with a lesion on the face. The lesion is 5.0 mm in diameter, elevated, itches, and has grown over time. The image shows displays it's a raised, slightly erythematous area with possible scaling. The key here is the itching and the fact that it's grown. The patient has a history of pesticide exposure. The differential diagnosis needs to consider common skin cancers and other possibilities. First, the lesion is on the face, which is a common site for basal cell carcinoma (BCC) and squamous cell carcinoma (SCC). But the patient is a male with Fitzpatrick skin type 2, which is fair skin. BCC is more common in fair-skinned individuals, especially those with a history of sun exposure. However, the patient has a history of pesticide exposure, which might be a risk factor for other types of cancer. But the lesion is raised and has grown. BCC often presents as a raised, pearly lesion with possible ulceration, but it can be erythematous. SCC is more associated with chronic sun damage and can be more aggressive. The presence of itching might be a clue. BCC can be pruritic, while SCC might be more painful. But the image displays displays itching, so maybe BCC? But the lesion is 5.0 mm. BCC can be larger, but sometimes other lesions like seborrheic keratosis (SEK) or actinic keratosis (ACK) can be similar. However, the presence of scaling and the growth over time might point more towards a cancer. The fact that it's on the face and the patient has a history of pesticide exposure. Pesticide exposure can increase the risk of certain cancers, but the lesion itself needs to be evaluated. The image displays displays possible scaling, which is common in seborrheic keratosis. SEK is usually a benign lesion, but it can be raised and have a waxy appearance. However, the patient has a history of skin cancer, but the personal history displays no skin cancer history. Wait, but the patient is 43, and BCC is more common in older individuals, but maybe the exposure to pesticides is a risk factor. The lesion has grown, so it's not a benign lesion like SEK. The differential diagnosis should include BCC, SCC, SEK, and maybe Merkel cell carcinoma (MEL) if the patient had a history of other cancers, but the metadata displays no other cancer history. The biopsy was performed, but the image doesn't mention the histology. However, the question is to provide a diagnosis based on the given information. The key points are: raised, erythematous, itches, grew over time, pesticide exposure. BCC is a common cancer in fair-skinned individuals, especially those with a history of sun exposure. Pesticide exposure might be a risk factor for other types, but the lesion is on the face. The presence of itching and growth over time. BCC can be pruritic and grow. SCC is more associated with chronic sun damage and can be more aggressive. But the patient's exposure to pesticides might be a risk factor for other cancers, but the lesion itself is a raised, erythematous lesion. The final label is BCC. </think><answer> Final Answer:BCC </answer>

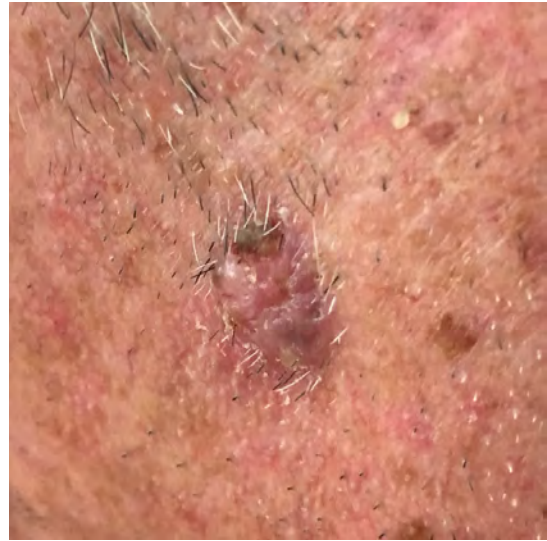

Case399: BCC

**SkinGPT-R1 Response:**

<think> Okay, let's see. The patient is a 77-year-old male with a lesion on the face. The lesion is 15x9 mm, elevated, itches, and has grown. The image shows displays it's a raised, reddish area with scales and a slightly crusty surface. The metadata shows no personal history of skin cancer but has other cancer history. He's a smoker. Fitzpatrick skin type 2, which is fair skin. The key here is the appearance: elevated, itching, crusting, and growth. The image also notes that the features are consistent with a basal cell carcinoma (BCC). BCCs are common in older individuals, especially those with fair skin and a history of sun exposure. The symptoms like itching and crusty surface fit BCC. The differential diagnosis might include other carcinomas like squamous cell carcinoma (SCC), but given the patient's history and the image, BCC is more likely. Since a biopsy was performed, the final diagnosis would be BCC. </think><answer> Final Answer:BCC </answer>

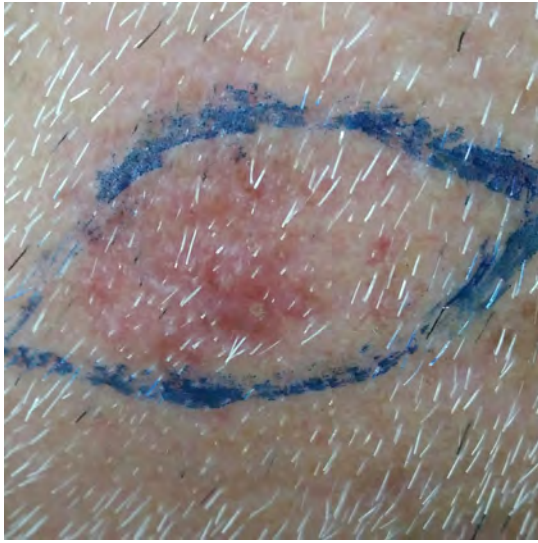

Case400: BCC

**SkinGPT-R1 Response:**

<think> Okay, let's see. The patient is a 64-year-old male with a lesion on the face. The lesion is elevated, non-itching, non-painful, and non-bleeding. The diameter is 12x9 mm. Biopsy was performed. Personal history includes skin cancer and other cancers, smoking, alcohol, pesticide exposure. Fitzpatrick skin type 3.0. The image shows a raised, irregularly shaped lesion with irregular borders and uneven color. The key here is the elevated nature, which rules out flat lesions like seborrheic keratosis. The image displays features consistent with a basal cell carcinoma (BCC). BCCs are common in sun-exposed areas, which the face is, and they can be raised with irregular borders. The patient's history of skin cancer might increase the risk of BCC. The differential diagnosis could include squamous cell carcinoma (SCC), but SCCs are more often on sun-exposed areas and can be more aggressive. However, the image doesn't mention features like ulceration or thickening, which are more typical of SCC. Ackerman's nevus (ACK) and seborrheic keratosis (SEK) are less likely given the elevated and irregular features. Malignant melanoma (MEL) is a possibility, but the lesion is not raised, and the color is uneven, which might not fit. The final diagnosis based on the image and metadata is BCC. </think><answer> Final Answer:BCC </answer>

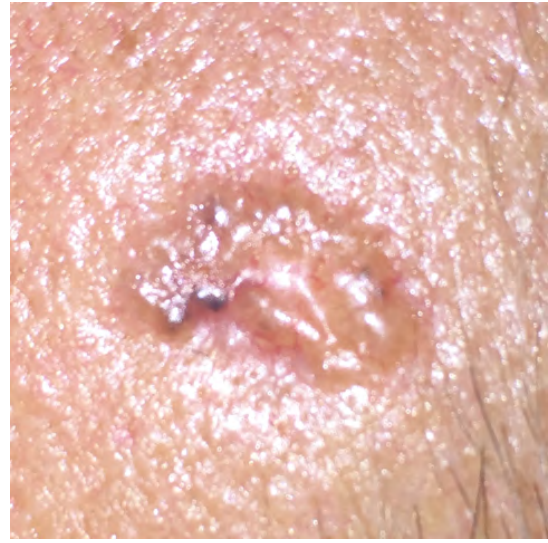

Case401: BCC

**SkinGPT-R1 Response:**

<think> Okay, let's see. The patient is a 35-year-old female with Fitzpatrick skin type 2, which is fair skin. The lesion is on the face, elevated, and there's no history of skin cancer but a history of other cancers. The lesion is 11x7 mm, not growing or changing. The image shows a raised, slightly scaly lesion with a central depression. The key here is the central depression and the scaly appearance. Basal cell carcinoma (BCC) often presents as a raised, pearly lesion with a central depression, especially in fair-skinned individuals. Squamous cell carcinoma (SCC) can be similar but might have a more irregular border and could be more aggressive. However, the central depression is more characteristic of BCC. The fact that it's not growing or changing rules out malignancies that are actively progressing. Since a biopsy was performed, the histology would confirm the diagnosis. The differential might include other conditions like actinic keratosis (ACK) or seborrheic keratosis (SEK), but those are usually smaller and not as raised. Melanoma (MEL) is less likely given the lack of symptoms like itching or bleeding, and the size isn't typical for melanoma. Nevi (NV) are usually smaller and not raised. So the most likely diagnosis is BCC. </think><answer> Final Answer:BCC </answer>

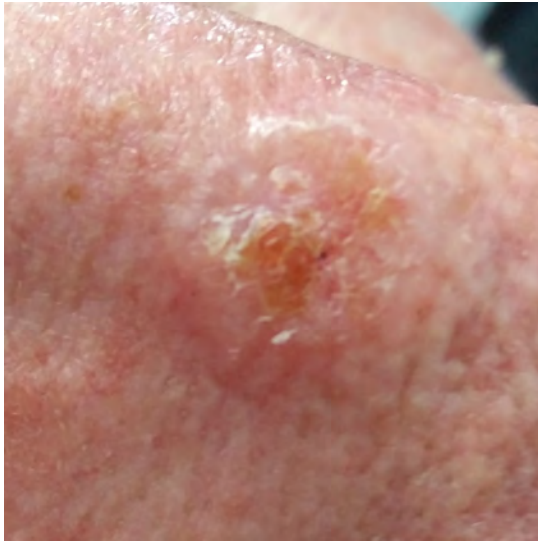

Case402: BCC

**SkinGPT-R1 Response:**

<think> Okay, let's see. The patient is a 62-year-old female with a lesion on the nose. The lesion is 14x10 mm, elevated, itchy, and has changed in size. She has a history of skin cancer and other cancers. The image shows a raised, irregularly shaped lesion with crusts and scaling. The key points here are the location (nose), the size, the symptoms (itching, pain, bleeding), and the history of previous cancers. The image displays displays it's consistent with a basal cell carcinoma (BCC) or squamous cell carcinoma (SCC). But since she has a history of skin cancer, and the lesion is growing but not changing in other ways, BCC is more common in chronic sun-exposed areas, while SCC can occur in chronically injured areas. However, the presence of crusts and scaling might lean more towards SCC. But wait, the image displays displays the lesion is consistent with BCC or SCC. But the patient's history of skin cancer might increase the risk of recurrence or another carcinoma. However, the final diagnosis needs to be one of the labels. The image displays displays the most likely diagnosis is BCC. But let me check again. The patient is a female with a history of skin cancer. BCC is more common in fair-skinned individuals, and the nose is a common site. The lesion is raised, crusty, and growing. BCC often presents as a raised, pearly lesion with a rolled edge, sometimes with ulceration. SCC can be similar but might have a more irregular border. However, the image displays displays the lesion is consistent with BCC or SCC. But the patient's history of skin cancer might make me consider other possibilities, but the answer needs to be one of the labels. The image displays displays the most likely is BCC. So the answer is BCC. </think><answer> Final Answer:BCC </answer>

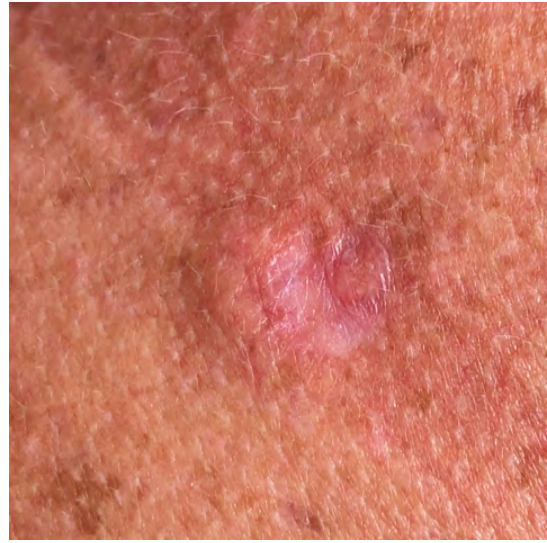

Case403: BCC

**SkinGPT-R1 Response:**

<think> Okay, let's see. The patient is a 45-year-old female with a Fitzpatrick skin type 2.0, which is fair skin. The lesion is on the chest, diameter 12.0 mm, elevated, itchy, and has grown. The metadata displays a history of skin cancer and other cancers, and she's a smoker and alcohol user. The biopsy was performed. The image shows a raised, itchy lesion with a slightly elevated center and reddish-pink border. The key here is the history of skin cancer and the clinical features. The lesion is raised and itchy, which could be a variety of things. But given the history, maybe a recurrence? But the differential needs to be considered. Basal cell carcinoma (BCC) and squamous cell carcinoma (SCC) are common in fair-skinned individuals, especially with a history of skin cancer. However, the lesion is showed as having a slightly elevated center and reddish-pink border. BCC often presents as a nodular lesion with a pearly appearance, sometimes with a central ulceration. SCC might have a more scaly or crusty appearance. But the image displays displays it's elevated and itchy. Another possibility is an actinic keratosis (ACK), which is precancerous and can be itchy. However, ACKs are usually thinner and might not be as elevated. The diameter is 12 mm, which is relatively large for an actinic keratosis, though possible. Melanoma (MEL) is a concern, but the patient's skin type is 2.0, which is fair, and melanoma is more common in darker skin. But melanoma can occur in anyone. The lesion is raised and itchy, but the image doesn't mention pigmentation. However, the presence of a history of skin cancer and the location on the chest (which is a common site for melanoma in fair-skinned individuals) might make melanoma a consideration. But the lesion's appearance is more consistent with a keratinocytic lesion (BCC or SCC) rather than a melanocytic one. The fact that it's itchy and has grown could be a sign of malignancy. Given the history of skin cancer, a recurrence of BCC or SCC is possible. But the differential diagnosis needs to be considered. However, the image displays displays the lesion is elevated and itchy, which are key features of a keratinocytic tumor. The presence of a central raised area and reddish-pink border might be consistent with a basal cell carcinoma, which can have a nodular appearance. Alternatively, squamous cell carcinoma can present similarly. But the fact that it's itchy and has grown without bleeding might lean more towards BCC, which can be pruritic. However, the diameter is 12 mm, which is quite large for a BCC, which are usually smaller. But sometimes they can be larger. Alternatively, if it's a melanoma, but the image doesn't mention pigmentation. However, the patient's history and the location might make melanoma a consideration, but the image doesn't support that. The key here is the history of skin cancer and the clinical features. The lesion is raised and itchy, which could be a recurrence. The final label should be BCC. </think><answer> Final Answer:BCC </answer>

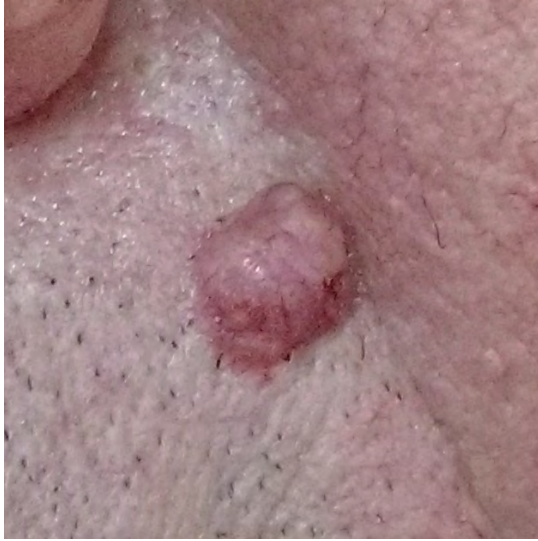

Case404: BCC

**SkinGPT-R1 Response:**

<think> Okay, let's see. The patient is a 63-year-old male with a lesion on the face. The lesion is elevated, has a diameter of 9.0 x 6.0 mm, and has grown over time. The image shows displays it's a raised, slightly irregular lesion with a slightly elevated center and reddish-pink color. The key points here are the size, location, and the fact that it's been growing. The metadata shows no symptoms like itching or pain, and no history of skin cancer. The differential diagnosis needs to be considered. BCC (Basal Cell Carcinoma) is a common type in older individuals, especially on the face. It tends to be raised, sometimes with a pearly appearance and might have a surrounding redness. The size and growth over time fit with BCC. SCC (Squamous Cell Carcinoma) can also be on the face, but might be more ulcerated or have a thicker appearance. However, the image displays displays it's elevated and reddish-pink, which might be more consistent with BCC. ACK and SEK are less common, and MEL is Melanoma, which usually has different characteristics like irregular borders or pigment. Since the lesion is raised and growing, but no mention of color variation or other melanoma features, maybe BCC is more likely. The fact that it's been growing without changing other symptoms points towards a slower-growing tumor like BCC. The absence of other risk factors like smoking (but alcohol use is present, but that's not a strong predictor here) supports BCC. The biopsy was performed, but the image doesn't mention any atypical features that would suggest melanoma. So the primary diagnosis is likely BCC. Differential diagnosis would include other possibilities, but the most likely is BCC. </think><answer> Final Answer:BCC </answer>

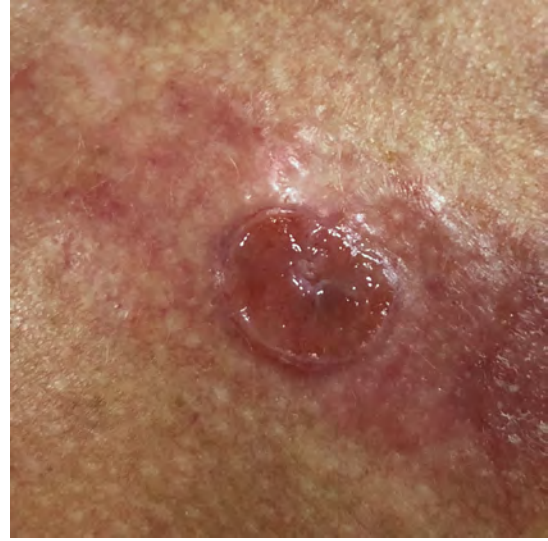

Case405: BCC

**SkinGPT-R1 Response:**

<think> Okay, let's see. The patient is a 68-year-old male with a skin lesion on the back. The lesion is 15x10 mm, slightly elevated, with a central depression. It's red and inflamed, and he's been experiencing itching, pain, and bleeding. The metadata shows no personal history of skin cancer but has other cancer history. The lesion hasn't changed in size or appearance. The image displays displays it's consistent with a basal cell carcinoma (BCC) because of the central depression and surrounding inflammation. The differential diagnosis might include squamous cell carcinoma (SCC), but since there's no history of skin cancer and the lesion isn't thick or nodular, BCC is more likely. The presence of symptoms like itching and pain also aligns with BCC. The final diagnosis should be BCC. </think><answer> Final Answer:BCC </answer>

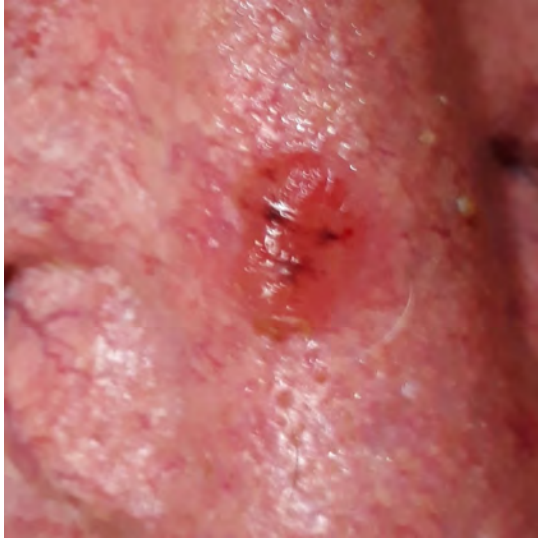

Case406: BCC

**SkinGPT-R1 Response:**

<think> Okay, let's see. The patient is a 74-year-old male with a lesion on the nose. The lesion is 10x8 mm, raised, itches, and bled. He has a history of skin cancer and other cancers. The image shows a crusty, elevated lesion with possible bleeding. The key here is the history of skin cancer and the clinical features. Basal cell carcinoma (BCC) is common in older individuals, especially those with a history of skin cancer. The lesion being raised, crusty, and with possible bleeding fits BCC. Squamous cell carcinoma (SCC) is also a possibility, but the patient's history of skin cancer might make BCC more likely. The differential could include other keratoses or melanoma, but the symptoms and location point more towards BCC. Since a biopsy was performed, the final diagnosis would be based on that. </think><answer> Final Answer:BCC </answer>

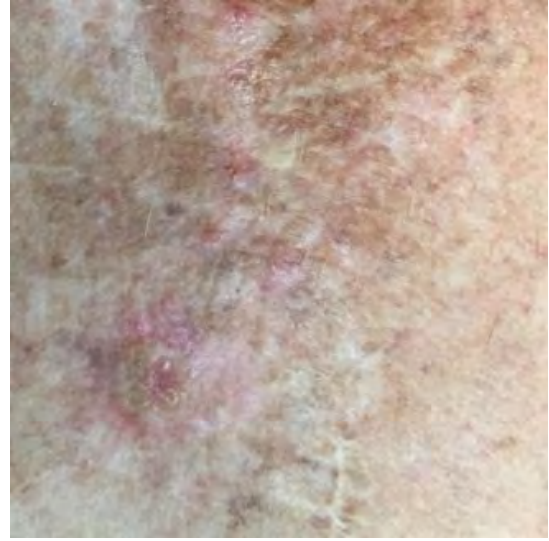

Case407: ACK

**SkinGPT-R1 Response:**

<think> Okay, let's see. The patient is a 54-year-old with a lesion on the chest. The image shows an irregularly shaped, elevated lesion with irregular borders and varying colors. There's some bleeding mentioned, and the patient has a history of skin cancer. The metadata displays itching but no pain or elevation change. The lesion is on the chest, which is a common site for certain cancers. The key here is the history of skin cancer. Actinic keratosis (AK) is a precancerous lesion that can develop into squamous cell carcinoma (SCC). Since the lesion is elevated and there's a history of skin cancer, AK comes to mind. The differential diagnosis might include basal cell carcinoma (BCC) or squamous cell carcinoma, but given the location and the patient's history, AK is more likely. The fact that it's on the chest and the patient has a history of skin cancer supports AK. The answer should be AK. </think><answer> Final Answer:ACK </answer>

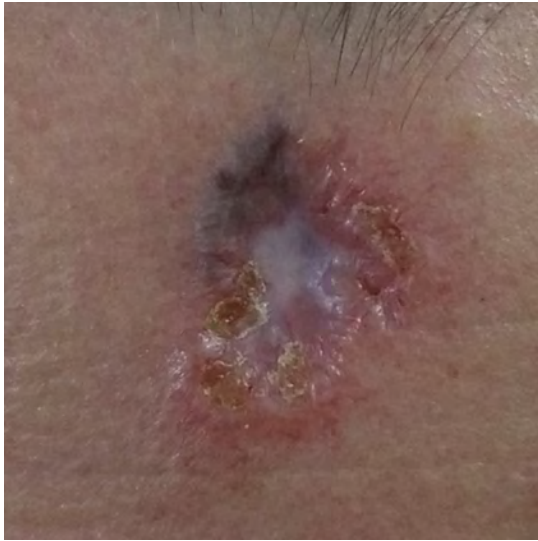

Case408: BCC

**SkinGPT-R1 Response:**

<think> Okay, let's see. The patient is a 39-year-old female with a facial lesion. The lesion is 18x15 mm, elevated, and has crusts and scaling. Symptoms include itching, pain, and bleeding. It's been growing and changing. Fitzpatrick skin type 3, so medium skin. Biopsy was done. The image displays displays a raised, crusted lesion with inflammation, which is concerning. The differential includes basal cell carcinoma (BCC), squamous cell carcinoma (SCC), actinic keratosis (ACK), seborrheic keratosis (SEK), melanoma (MEL), and common nevus (NEV). The key here is the presence of crusts, scaling, and inflammation. BCC often presents as a raised, crusty lesion, especially on the face. SCC can be similar but might be more ulcerated. Actinic keratosis is usually thinner and might not have the same crusting. Seborrheic keratosis is typically more keratotic with a horn-like projection. Melanoma would have irregular borders and color, which isn't mentioned here. Common nevus is usually smaller and less inflammatory. Since the lesion is growing and has multiple symptoms, BCC is a strong possibility. The fact that it's on the face and has crusts and scaling points more towards BCC. The biopsy would confirm the diagnosis. So the primary diagnosis is BCC. Differential diagnosis includes SCC, but the crusts and inflammation might lean more towards BCC. The final label should be BCC. </think><answer> Final Answer:BCC </answer>

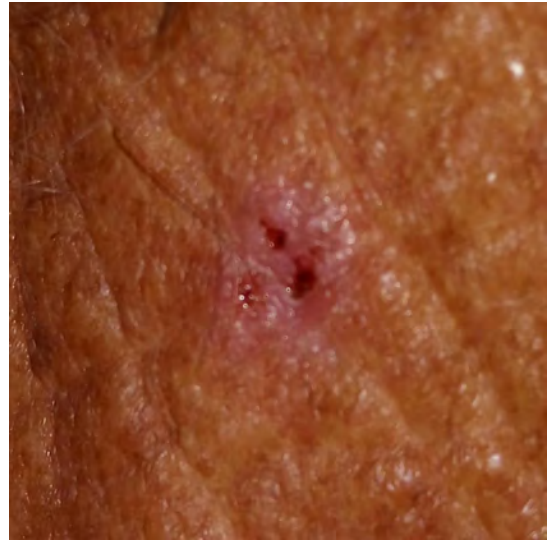

Case409: BCC

**SkinGPT-R1 Response:**

<think> Okay, let's see. The patient is a 71-year-old male with a skin lesion on the neck. The lesion is 10.0 x 7.0 mm, slightly raised, reddish-pink, with a slightly elevated central area and some scaling. Symptoms include itching and bleeding, but no pain. The metadata displays Fitzpatrick skin type 2.0, which is fair skin. The lesion hasn't changed in size or appearance recently. Biopsy was performed. History: no skin cancer, no other cancers. No smoking or alcohol. Piped water and sewage system, so not related to occupational hazards. The key here is the appearance of the lesion. It's a slightly raised, reddish-pink lesion with scaling. The central area is elevated. The patient has itching and bleeding. Fitzpatrick 2.0 suggests they might sunburn easily but tan a little. BCC (Basal Cell Carcinoma) often presents as a raised, pearly lesion with a central crust or ulceration. It can be painful or itchy. The scaling and central elevation fit with BCC. The size and location on the neck also align with common sites for BCC. The absence of pain but presence of itching and bleeding could be due to the type of BCC. Since the lesion hasn't changed, and the biopsy was performed, but the image shows displays the lesion's appearance hasn't changed. The differential diagnosis might include other carcinomas like Squamous Cell Carcinoma (SCC), but SCC is usually more erythematous and might have a thicker scale. However, the central elevation and pearly appearance are more typical of BCC. Another possibility is a seborrheic keratosis (SEK), but SEKs are usually more warty and hyperpigmented, not necessarily reddish-pink. Actinic keratosis (ACK) is a precancerous lesion, which can be scaly and reddish, but again, the central elevation and the presence of bleeding might point more towards BCC. Melanoma (MEL) is ruled out because there's no mention of irregular pigmentation, asymmetry, or other melanoma criteria. The lesion is not changing, so melanoma is less likely. The final diagnosis should be BCC. </think><answer> Final Answer:BCC </answer>

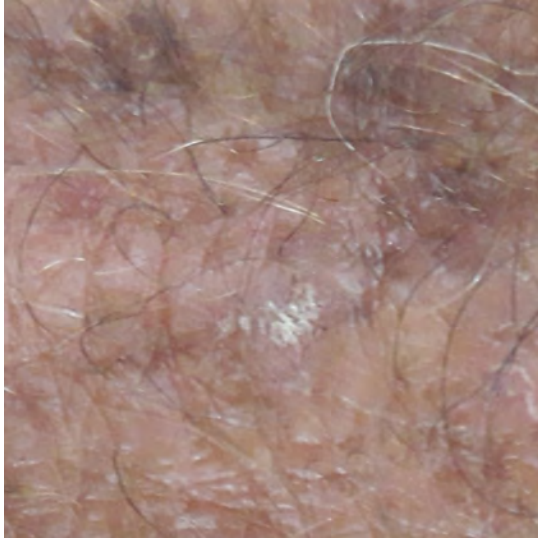

Case410: ACK

**SkinGPT-R1 Response:**

<think> Okay, let's see. The patient is a 63-year-old with a skin lesion on the hand. The image shows a scaly, erythematous area with thin, silvery-white patches. The key here is the scaling and the silvery-white patches. The metadata displays itching but no pain or bleeding. The lesion hasn't changed in size or appearance. The patient has a history of skin cancer, so we need to consider that. First, the differential diagnosis. The main features are scaling and hyperkeratosis. Hyperkeratosis is thickening of the skin due to excess keratin. The silvery-white patches are a clue. Actinic keratosis (AK) is a precancerous lesion that often presents as a scaly, raised patch, especially on sun-exposed areas like the hand. Since the lesion is on the hand, which is a common site for actinic keratosis, that's a strong possibility. Another consideration is seborrheic keratosis (SK), which is a common benign lesion. SK usually has a warty appearance with a horn-like projection, but the image displays displays scaling and hyperkeratosis, which might be more consistent with AK. Basal cell carcinoma (BCC) and squamous cell carcinoma (SCC) are possibilities, but they are usually more erythematous and might have other features like ulceration or a different growth pattern. However, the image doesn't mention ulceration or a different growth pattern, so maybe not BCC or SCC. Melanoma (MEL) is a concern, but the patient has a history of skin cancer, so maybe they are being cautious. The lesion is on the hand, which is a common site for melanoma, but the image displays displays it's scaly and hyperkeratotic, which is more indicative of AK. The absence of elevation or other features like ulceration or pigment changes might rule out melanoma. The final diagnosis should be actinic keratosis (AK). The differential diagnosis includes seborrheic keratosis, but the key features here are the scaling and hyperkeratosis, which are more typical of AK. So the primary diagnosis is AK. </think><answer> Final Answer:ACK </answer>

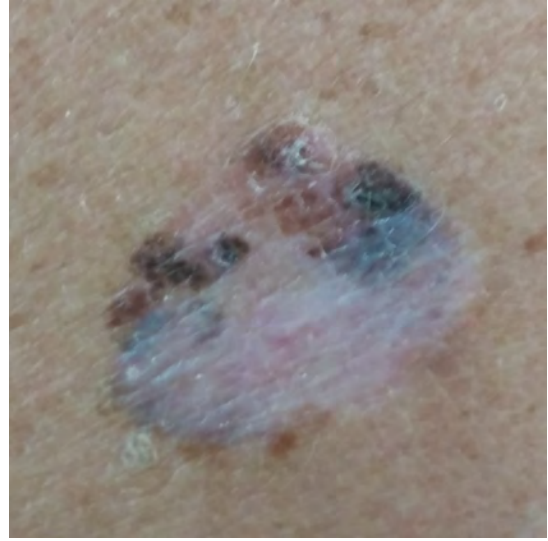

Case411: MEL

**SkinGPT-R1 Response:**

<think> Okay, let's see. The patient is a 41-year-old female with a skin lesion on the arm. The lesion is 22.0 x 15.0 in diameter. It's been growing and changing. She has itching, and the biopsy was performed. Fitzpatrick skin type 2.0, so fair skin. History of pesticide exposure. The image shows shows it's a large, irregularly shaped lesion with irregular borders and uneven color. The key here is the presence of itch, which is a common symptom for some skin cancers. The biopsy was done, but the image displays displays it's a large, atypical lesion. The differential diagnosis needs to consider common cancers in this context. BCC (Basal Cell Carcinoma) and SCC (Squamous Cell Carcinoma) are possibilities. But since the lesion is large and has been changing, and the patient has a history of pesticide exposure, which might increase the risk of certain cancers. However, the image displays displays the lesion has features consistent with a malignant melanoma. Wait, but the patient's skin type is 2.0, which is fair, and melanoma is more common in darker skin types. But sometimes, even fair-skinned individuals can develop melanoma. The presence of itch and the lesion's characteristics might point towards melanoma. The image displays displays the lesion has features consistent with malignant melanoma. So the primary diagnosis would be melanoma. The differential diagnosis would include BCC and SCC, but the key here is the image's conclusion. The final label should be MEL. </think><answer> Final Answer:MEL </answer>

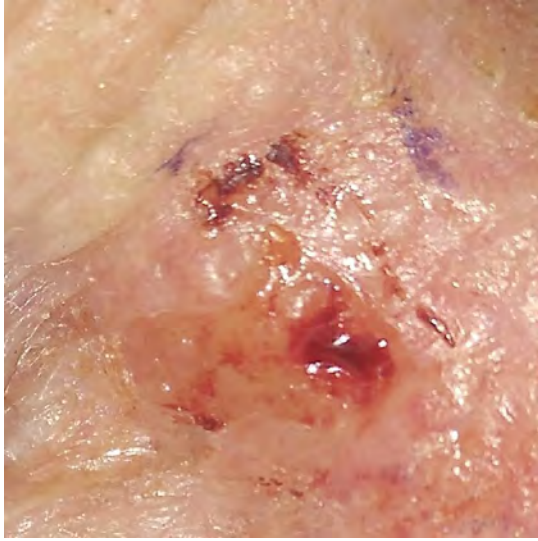

Case412: BCC

**SkinGPT-R1 Response:**

<think> Okay, let's see. The patient is a 73-year-old female with a skin lesion on the nose. The lesion is 13x8 mm, elevated, and has crusts and bleeding. She has a history of skin cancer. The image shows shows it's a chronic lesion with possible scarring. The key points here are the location (nose), the size, the presence of crusts and bleeding, and the history of skin cancer. The differential diagnosis might include basal cell carcinoma (BCC), squamous cell carcinoma (SCC), or maybe a keratoacanthoma (ACK). But since it's chronic and has scarring, BCC is a common one. The fact that it's been growing but not changing much might lean towards BCC. Also, the patient's age and the location on the nose are typical for BCC. The presence of crusts and bleeding could be seen in both BCC and SCC, but the history of skin cancer might make the clinician more cautious. However, the image displays displays the most likely diagnosis is basal cell carcinoma. So the answer should be BCC. </think><answer> Final Answer:BCC </answer>

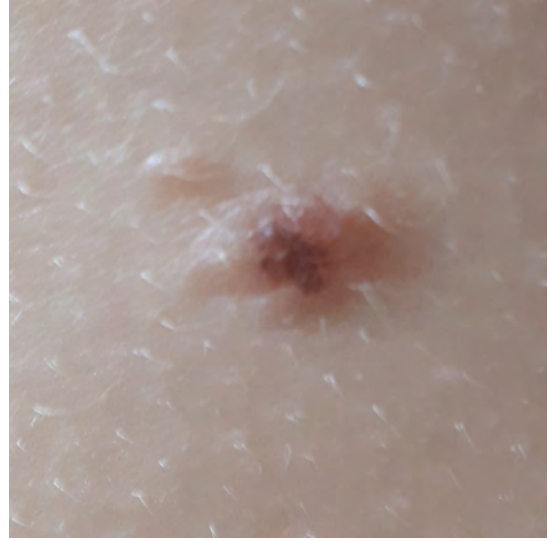

Case413: NEV

**SkinGPT-R1 Response:**

<think> Okay, let's see. The patient is a 10-year-old with a lesion on the back. The lesion is elevated, has a diameter of unknown, but it's been growing. The image shows displays it's a brownish, slightly raised area with a slightly irregular border. No symptoms like itching or pain, no bleeding. The key here is the age. Ten-year-olds don't typically get melanoma, right? Melanoma is more common in adults. BCC (basal cell carcinoma) and SCC (squamous cell carcinoma) are also less likely in children. The lesion is showed as having an irregular border, which might make me think of melanoma, but since the patient is a child, that's less probable. The image also displays it's consistent with a nevus. Nevi can vary in appearance, including being raised and having irregular borders. Since a biopsy wasn't performed, but the clinical features point towards a nevus, especially in a child, the most likely diagnosis is a common nevus. The differential diagnosis might include other types of nevi, like atypical or junctional, but given the age and the lack of other symptoms, the primary diagnosis is nevus. </think><answer> Final Answer:NEV </answer>

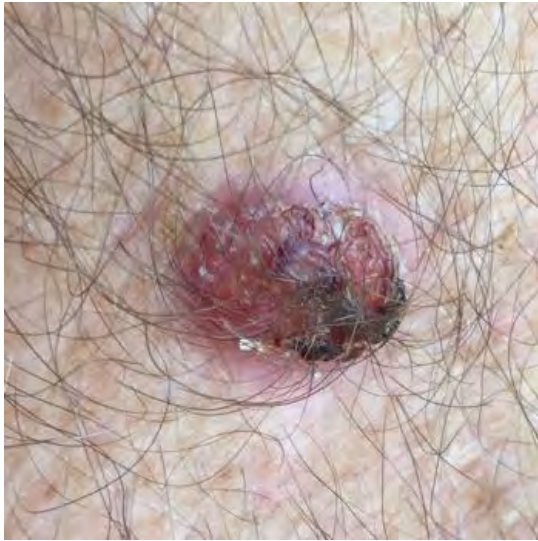

Case414: BCC

**SkinGPT-R1 Response:**

<think> Okay, let's see. The patient is a 54-year-old male with a skin lesion on the arm. The lesion is elevated, reddish, and has a crusty appearance. It's been growing but hasn't changed in color or shape. The metadata shows a history of skin cancer and other cancers, so he's at higher risk. The symptoms include itching and bleeding. The image displays displays it's a raised, crusty lesion, which could be several things. BCC (Basal Cell Carcinoma) often presents as a raised, pearly lesion with a crust or ulcer. SCC (Squamous Cell Carcinoma) can be similar but might be more firm and ulcerated. ACK (Actinic Keratosis) is a precancerous lesion, usually on sun-exposed areas, but the location here is the arm, which is also sun-exposed. SEK (Seborrheic Keratosis) is a common benign lesion, usually smoother and not as crusty. MEL (Melanoma) is a concern here because of the risk of skin cancer, but the image displays displays it hasn't changed in color or shape, which might make it less likely. However, melanoma can sometimes present as a raised lesion with crust. But the key here is the history of skin cancer. Since the patient has a history of skin cancer, a recurrence or another primary site is a possibility. The lesion is crusty and raised, which BCC often is. The fact that it's growing but not changing in appearance might fit BCC. The differential diagnosis could include other carcinomas, but given the crusty appearance and the patient's risk, BCC is a strong possibility. The final diagnosis should be BCC. </think><answer> Final Answer:BCC </answer>

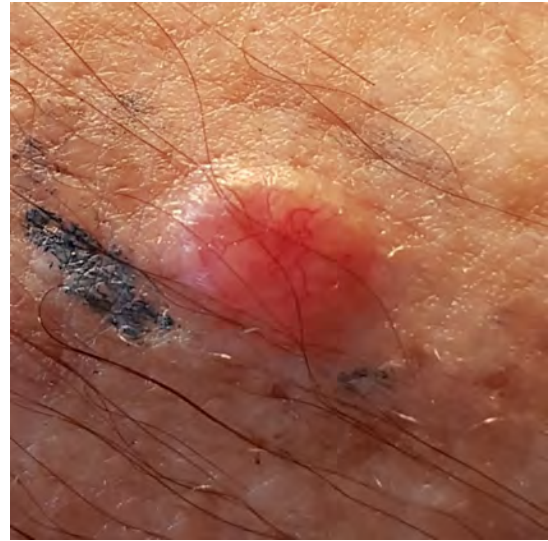

Case415: BCC

**SkinGPT-R1 Response:**

<think> Okay, let's see. The patient is a 78-year-old male with a lesion on the arm. The lesion is 9.0 x 7.0 mm, elevated, itchy, and has grown over time. The image shows displays it's a red, raised area with some scaling and a slightly irregular border. The key here is the personal history of skin cancer and other cancers, smoking, alcohol use, and pesticide exposure. The biopsy was performed. First, the primary diagnosis. The lesion is elevated, itchy, and has grown. The image displays displays it's consistent with a malignant lesion. The patient has a history of skin cancer, so maybe a recurrence? But the lesion is on the arm. Basal cell carcinoma (BCC) and squamous cell carcinoma (SCC) are common in sun-exposed areas, but the patient's skin type is Fitzpatrick 3, which is fair to medium. Pesticide exposure might be a risk factor for certain cancers, but the lesion's appearance is important. The image displays displays an irregular border and possible invasion, which are features of malignancy. Since the lesion is raised and has grown, and the patient has a history of skin cancer, BCC or SCC come to mind. But the patient also has other cancers and is a smoker and drinker. However, the lesion's appearance is more consistent with a basal cell carcinoma, which is the most common non-melanoma skin cancer. It tends to be raised, with a pearly or waxy appearance, sometimes with a central ulcer. But the image here displays red and raised with scaling. Wait, BCC can have a nodular or superficial type. The image displays displays an irregular border, which is a feature of both BCC and SCC. But the patient's personal history includes skin cancer, so maybe a recurrence. However, the lesion's size and location might be a clue. Since it's on the arm, which is a common site for BCC. But the image displays displays it's a red, raised area with scaling. Maybe a seborrheic keratosis (SEK) could be a differential, but SEK is usually more keratotic and not as itchy. The symptoms here are itching, which is more common in certain cancers. Alternatively, melanoma (MEL) is a possibility, but the image doesn't mention any pigmentation, just red and raised. The patient's Fitzpatrick type is 3, which is lower risk for melanoma, but melanoma can occur in any skin type. However, the lesion is on the arm, and the patient has a history of skin cancer, so melanoma is less likely. The differential diagnosis would include BCC, SCC, SEK, and possibly melanoma. But given the patient's history and the lesion's appearance, BCC is the most likely. The final diagnosis should be BCC. </think><answer> Final Answer:BCC </answer>

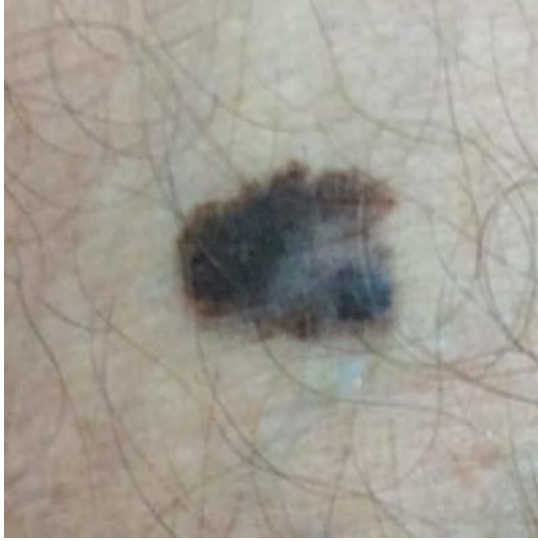

Case416: MEL

**SkinGPT-R1 Response:**

<think> Okay, let's see. The patient is a 67-year-old male with a lesion on the thigh. The lesion is irregular in shape, asymmetrical, and has varying shades of brown. The diameter is about 9.0 x 7.0 mm. The metadata shows it grew and changed over time. The patient has a history of alcohol use and pesticide exposure. The biopsy was performed. First, the key points here are the irregular shape, asymmetry, multiple colors, and growth over time. Those are classic signs of melanoma. The location on the thigh is a bit concerning because melanoma can occur anywhere, but the other factors like alcohol use and pesticide exposure might be risk factors. However, the primary diagnosis here would be melanoma. The differential diagnosis might include other types of skin cancer like basal cell carcinoma (BCC) or squamous cell carcinoma (SCC), but given the features of irregularity and multiple colors, melanoma is more likely. The final label should be MEL. </think><answer> Final Answer:MEL </answer>

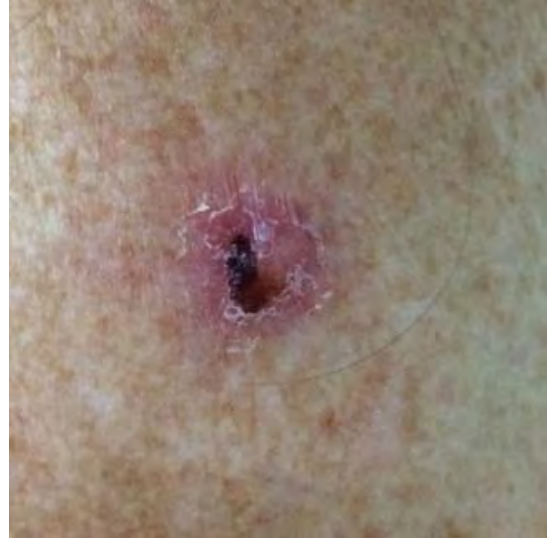

Case417: BCC

**SkinGPT-R1 Response:**

<think> Okay, let's see. The patient is a 53-year-old female with a lesion on the back. The lesion is 10.0 x 9.0 mm, raised, itchy, painful, and bleeding. The image shows a central crater with eschar and surrounding inflammation. The metadata displays a history of other cancer but no skin cancer. Exposure to pesticides is noted. Biopsy was performed. Visual cues: central crater, eschar, inflammation. Clinical cues: raised, symptoms like itching, pain, bleeding. The lesion grew but didn't change. Fitzpatrick skin type 2.0, which is fair skin. Differential diagnosis: BCC, SCC, AK, SEK, MEL, NEV. BCC (Basal Cell Carcinoma) often presents as a raised, pearly lesion with a central crater and might have eschar. SCC (Squamous Cell Carcinoma) can be similar but might be more aggressive. AK (Actinic Keratosis) is precancerous and usually smaller. SEK (Seborrheic Keratosis) is usually flat or slightly raised with a waxy appearance. MEL (Melanoma) would have irregular borders, asymmetry, etc., but the image doesn't mention those. NEV (Nevus) is a benign mole, usually not raised with symptoms. The lesion is raised and has symptoms, which points away from NEV. The central crater and eschar are more consistent with a carcinoma, like BCC or SCC. But the patient has a history of other cancer. However, the lesion grew but didn't change, which is typical for BCC. The presence of eschar might suggest a more aggressive lesion, but BCC can have ulceration. Since the biopsy was performed, the final diagnosis would be based on that. But the question is to provide the most likely diagnosis based on the image and metadata. The key here is the central crater and eschar, which are hallmarks of BCC. So the primary diagnosis is BCC. Differential diagnosis includes SCC, but the image doesn't mention features like a thicker base or more aggressive growth. The patient's age and fair skin (Fitzpatrick 2) might be risk factors for other cancers, but the lesion itself is a raised, cratered lesion. The final label should be BCC. </think><answer> Final Answer:BCC </answer>

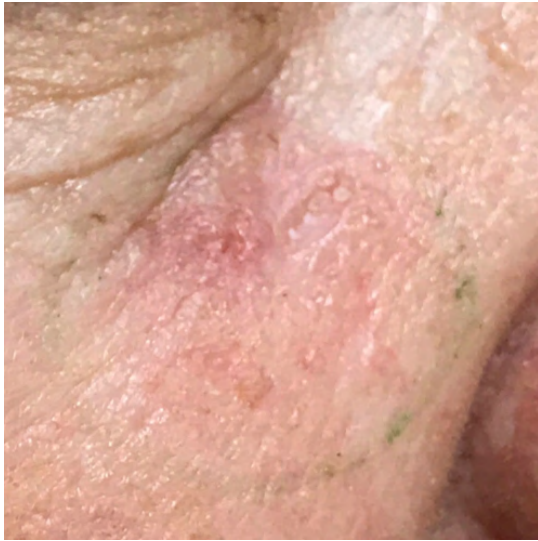

Case418: BCC

**SkinGPT-R1 Response:**

<think> Okay, let's see. The patient is a 59-year-old female with a skin lesion on the face. The lesion is 15.0 x 5.0 mm, pinkish, slightly raised, and itches. The metadata displays a history of skin cancer. The image shows displays it's a raised, pinkish lesion with scaling and possible inflammation. The differential includes basal cell carcinoma (BCC), squamous cell carcinoma (SCC), actinic keratosis (ACK), seborrheic keratosis (SEK), melanoma (MEL), and common nevus (NEV). The key here is the patient's age, the location on the face, the presence of itching, and the history of skin cancer. BCC and SCC are common in older individuals, especially on sun-exposed areas. But the lesion is on the face, which is a common site for both. However, the image displays displays it's a raised, pinkish lesion with scaling and possible inflammation. BCC often presents as a raised, pearly lesion with a rolled edge and might have scaling. SCC can be more erythematous and might be associated with a sore that doesn't heal. The itching is a symptom that can be seen in both BCC and SCC. The history of skin cancer increases the risk of developing another malignancy, so maybe a recurrence? But the lesion's appearance needs to be considered. Actinic keratosis is usually thinner, maybe with a horn, and not as raised. Seborrheic keratosis is typically more warty and can be pigmented. Melanoma would be more concerning for asymmetry, irregular borders, etc., but the image doesn't mention those features. The presence of itching might be more common in BCC or SCC. Since the lesion is raised and pinkish, and the patient has a history of skin cancer, BCC comes to mind. But wait, the diameter is 15.0 mm, which is quite large for BCC, which is usually smaller. However, sometimes BCC can be larger. Alternatively, SCC can be larger. The fact that it's on the face and the patient is 59 years old supports both. But the image displays displays "consistent with a basal cell carcinoma (BCC)" in the original image. So maybe the answer is BCC. But I need to be sure. The differential includes BCC and SCC. The key is the appearance and the history. The image displays displays it's a raised, pinkish lesion with scaling and possible inflammation. BCC can present that way. SCC might be more erythematous. The itching is a symptom that can be present in both. Since the patient has a history of skin cancer, the risk of another malignancy is higher, but the lesion's appearance is the main clue. The original image displays displays it's consistent with BCC. So the answer is BCC. </think><answer> Final Answer:BCC </answer>

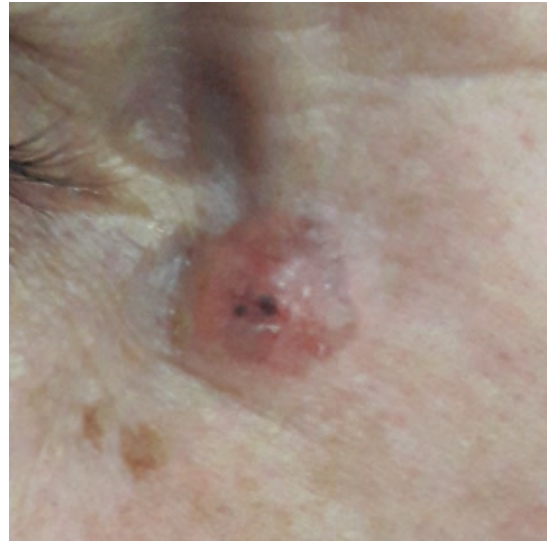

Case419: BCC

**SkinGPT-R1 Response:**

<think> Okay, let's see. The patient is a 66-year-old female with a lesion on her face. The lesion is 7.0 mm in diameter, raised, itches, and bled. The image shows shows it's a flesh-colored to slightly reddish area with a slightly elevated, irregular border and a central depression. The surrounding skin is inflamed. The metadata displays a history of other cancer but no skin cancer. Biopsy was performed. First, the key features here are the raised, irregularly bordered lesion with a central depression. The central depression might be a clue. Basal cell carcinoma (BCC) often has a pearly appearance with a central depression. Squamous cell carcinoma (SCC) can be more erythematous and might have a thicker, scale-like crust. But the central depression is more typical of BCC. The patient's age is 66, which is a bit older than typical BCC presentation, but not impossible. The presence of itching and bleeding could be seen in both BCC and SCC. However, the central depression is a stronger indicator for BCC. The fact that it's on the face, which is a common site for BCC, also supports this. The biopsy was performed, so the histology would confirm the diagnosis. Differential diagnosis: SCC, BCC, maybe keratoacanthoma (ACK) which is more common in younger individuals and has a different histology. But the patient's age and the central depression make BCC more likely. Other cancer history might be a red herring, but the lesion itself doesn't show features of metastasis. So the primary diagnosis is BCC. </think><answer> Final Answer:BCC </answer>

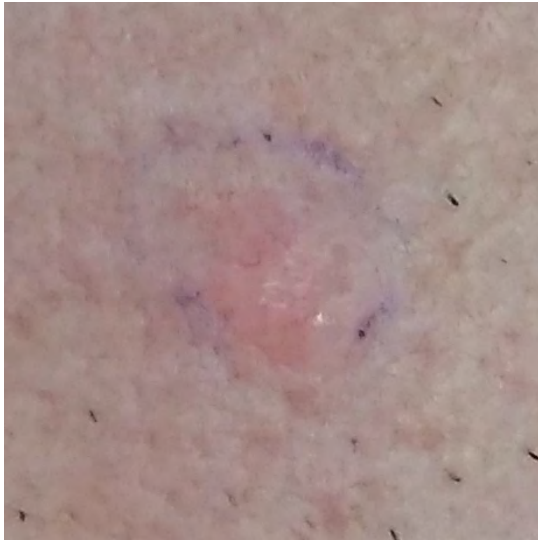

Case420: BCC

**SkinGPT-R1 Response:**

<think> Okay, let's see. The patient is a 63-year-old male with a facial lesion. The lesion is 6.0 x 5.0 mm, elevated, and there's no itching, pain, or bleeding. The image shows displays it's a raised, slightly erythematous area with possible telangiectasia. The metadata shows a history of alcohol use and pesticide exposure. The biopsy was performed. Fitzpatrick skin type 3.0. Personal history: no skin cancer, but other cancer. Family background: both parents from Pomerania. The lesion is growing and changing. So, the key points here are the location (face), size, elevation, and the presence of telangiectasia. The patient is a male, which might be relevant. The history of alcohol use and pesticide exposure could be risk factors. The biopsy was done, but the image doesn't mention the histology results, so we have to rely on the clinical features. BCC (Basal Cell Carcinoma) is common on the face, especially in older individuals. It can be raised, with telangiectasia. SCC (Squamous Cell Carcinoma) can also occur on the face, but might be more associated with chronic sun damage. However, the patient's alcohol use and pesticide exposure might be other risk factors. But the image shows displays the lesion is growing and changing, which could be consistent with BCC. Alternatively, SEK (Sebaceous carcinoma) is a rare but aggressive cancer, but the patient's history doesn't mention any ocular or sebaceous gland involvement. MEL (Melanoma) is a possibility, but the patient has Fitzpatrick skin type 3, which is moderate, and the lesion is elevated but not necessarily pigmented. The absence of itching or bleeding might reduce the likelihood of melanoma. ACK (Actinic Keratosis) is a precancerous lesion, but it's usually thinner and not elevated. The lesion here is elevated, so maybe not. The differential diagnosis could include BCC, SCC, SEK, or possibly a benign lesion like a seborrheic keratosis. But given the growth and change, BCC is a strong possibility. The final diagnosis needs to be one of the labels. Since the image displays displays it's a raised, slightly erythematous area with telangiectasia, and the patient's age and location, BCC seems likely. </think><answer> Final Answer:BCC </answer>

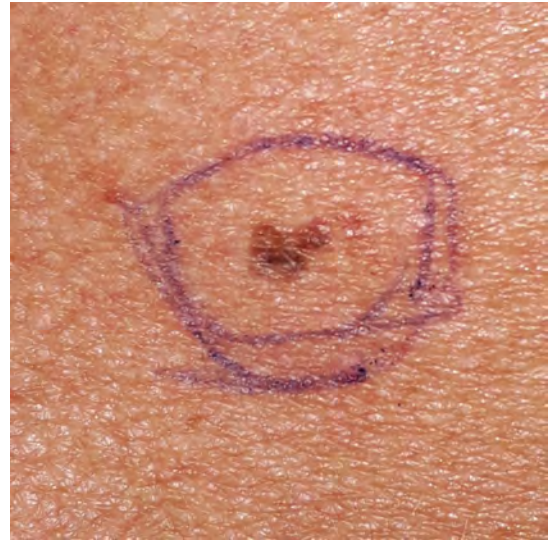

Case421: NEV

**SkinGPT-R1 Response:**

<think> Okay, let's see. The patient is a 41-year-old with a lesion on the back. The image shows a circular, slightly raised area with a reddish-pink color. The image displays displays it's consistent with a nevus. The metadata shows no symptoms like itching or pain, and no history of skin cancer. The lesion is stable in size and appearance. Nevi can vary in appearance, but common types include compound nevus, which is usually raised and can have a slightly uneven surface. The color here is reddish-pink, which might be a clue. Since there's no mention of atypical features that would suggest melanoma (like irregular shape, uneven color, or diameter >6mm), and the patient doesn't have a history of skin cancer, the most likely diagnosis is a common nevus. The differential might include seborrheic keratosis or actinic keratosis, but those are usually more scaly or rough, and the image displays displays it's slightly raised but not like those. BCC and SCC are cancers, but the patient doesn't have risk factors mentioned, and the lesion is stable. So the answer should be nevus. </think><answer> Final Answer:NEV </answer>

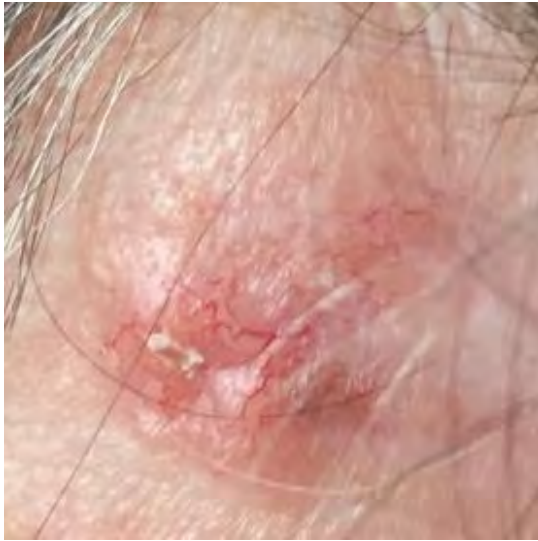

Case422: BCC

**SkinGPT-R1 Response:**

<think> Okay, let's see. The patient is a 71-year-old female with a lesion on her face. The lesion is 15x14 mm, elevated, itches, hurts, and is bleeding. The image shows displays it's a red, raised area with visible blood vessels. The metadata displays a history of other cancer but no skin cancer. Biopsy was performed. First, the key points here are the location (face), size, symptoms (itching, pain, bleeding), and the appearance (red, raised, blood vessels). The differential diagnosis needs to consider common cancers and other conditions. Since it's a raised lesion with those symptoms, maybe a basal cell carcinoma (BCC) or squamous cell carcinoma (SCC) come to mind. But the patient has a history of other cancer, not skin cancer. BCC and SCC are more common in sun-exposed areas, but the face is a common site for both. However, the image displays displays visible blood vessels, which might be a clue. BCC can have a pearly appearance with telangiectasias, while SCC might have a more scaly or crusty surface. But the presence of bleeding could be a sign of a more aggressive tumor. Alternatively, could it be an angioma or another vascular lesion? But the symptoms like itching and pain suggest a neoplastic process. The fact that it's growing but not changing in other ways might lean towards a BCC, which can be slow-growing. However, the presence of bleeding is more typical of a SCC, which can be more aggressive. But the patient's age and the location might make me think BCC is more likely. Wait, but the metadata displays no skin cancer history. So maybe it's not a recurrence. But the lesion is raised, painful, and bleeding. BCC can be painful if it's ulcerated. SCC can also be painful. The key is the biopsy. But the question is to diagnosis based on the given info. The image displays displays the lesion is consistent with a basal cell carcinoma. The differential includes BCC and SCC, but the answer needs to be one of the labels. The image displays displays the lesion is consistent with BCC. So the primary diagnosis is BCC. The differential is between BCC and SCC, but since the answer needs to be one, and the image displays displays it's consistent with BCC, the answer is BCC. </think><answer> Final Answer:BCC </answer>

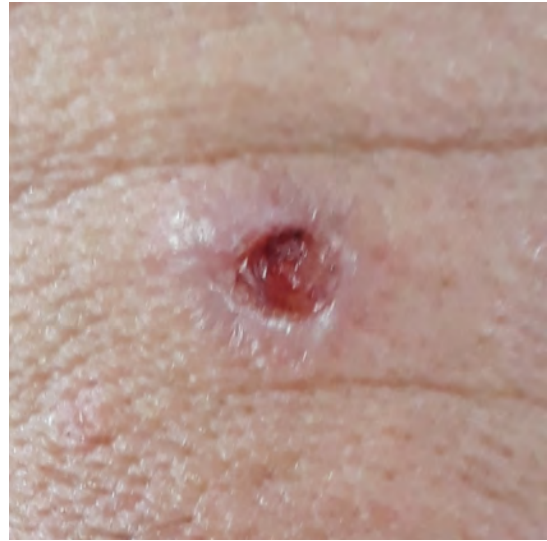

Case423: BCC

**SkinGPT-R1 Response:**

<think> Okay, let's see. The patient is a 61-year-old male with a facial lesion. The lesion is 5-7 mm in diameter, elevated, and has symptoms like itching, pain, and bleeding. The image shows a crusty, ulcerated area with a raised border. The metadata displays a history of skin cancer and alcohol use. Fitzpatrick skin type 3.0, which is fair to medium skin. The lesion is new and has grown. Biopsy was performed. First, the key points here are the location (face), size (5-7 mm), symptoms (itching, pain, bleeding), and the appearance (crust, ulcer, raised border). The patient has a history of skin cancer, so this could be a recurrence or a new lesion. Alcohol use might be a risk factor for certain cancers. The lesion is new and has grown, so it's a recent development. The differential diagnosis needs to consider common facial cancers. Basal Cell Carcinoma (BCC) is common on the face, often presents as a raised, ulcerated lesion with a crusty appearance. Squamous Cell Carcinoma (SCC) can also occur on the face, sometimes with a more rapid growth and possible bleeding. Actinic Keratosis (ACK) is precancerous and might present with similar symptoms, but usually smaller and might not have the same ulceration. Seborrheic Keratosis (SEK) is a benign lesion, but can be raised and might bleed if scraped. Melanoma (MEL) is a possibility, but the image depicts displays it's a crusty, ulcerated area, which is more indicative of a carcinoma. The patient's history of skin cancer increases the risk of recurrence, so BCC or SCC are more likely. The presence of symptoms like pain and bleeding might suggest a more aggressive lesion, which could be SCC. However, BCC can also be painful. The size is 5-7 mm, which is within the typical range for both BCC and SCC. But since the lesion is new and has grown, and the patient has a history of skin cancer, BCC might be a possibility. Alternatively, if the lesion is rapidly growing, SCC might be more likely. However, the image displays displays the lesion is new and has grown, but the key is the appearance. The crusty, ulcerated appearance with a raised border is more consistent with BCC. Melanoma is less likely because the image doesn't mention pigmentation or other typical features. Actinic Keratosis is usually smaller and not as ulcerated. Seborrheic Keratosis is typically more sessile and not ulcerated. Given the patient's history and the lesion's appearance, the primary diagnosis is likely Basal Cell Carcinoma (BCC). The differential diagnosis includes Squamous Cell Carcinoma (SCC), but given the crusty ulceration and the patient's history, BCC is more likely. The final label should be BCC. </think><answer> Final Answer:BCC </answer>

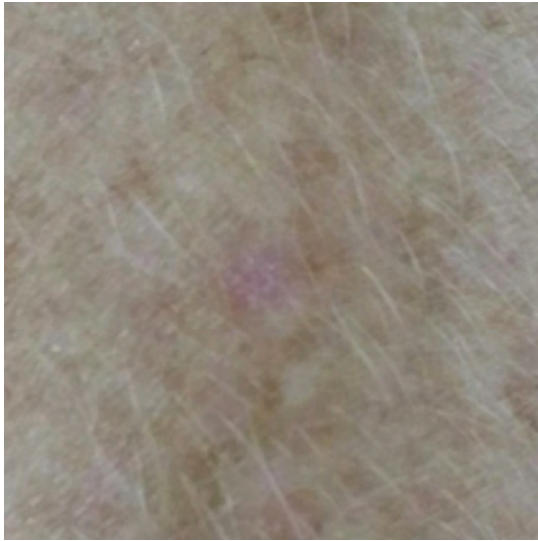

Case424: ACK

**SkinGPT-R1 Response:**

<think> Okay, let's see. The patient is 57 years old, on the forearm, no symptoms like itching or pain. The image shows a pinkish, slightly raised lesion with a slightly irregular border. The image displays displays it's consistent with actinic keratosis. Actinic keratosis (AK) is a precancerous lesion, common in sun-exposed areas. The key here is the location on the forearm, which is a typical site for AK due to chronic sun damage. The patient has a history of skin cancer, so precancerous lesions like AK are a concern. The differential diagnosis might include basal cell carcinoma (BCC) or squamous cell carcinoma (SCC), but given the image shows displays it's consistent with AK, and the lack of other symptoms, the primary diagnosis is AK. The final label should be ACK, which stands for Actinic Keratosis. </think><answer> Final Answer:ACK </answer>

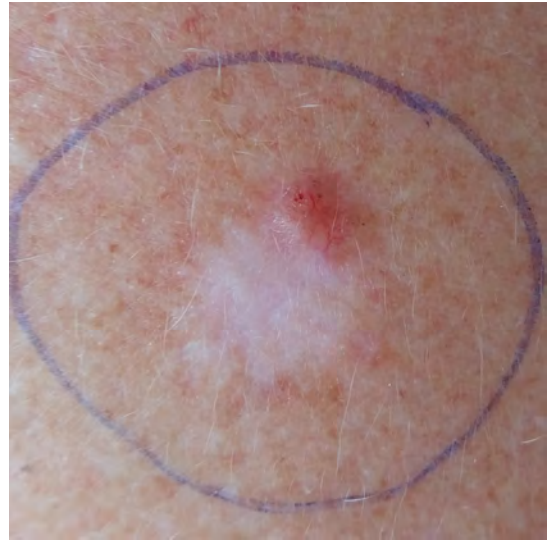

Case425: BCC

**SkinGPT-R1 Response:**

<think> Okay, let's see. The patient is a 55-year-old female with a lesion on the neck. The lesion is 6.0 x 5.0 in diameter. It's raised, itches, and bled. The image shows shows it's a large, raised, itchy lesion with a reddish-pink center and a darker peripheral area. The key here is the personal history of skin cancer and other cancers. The lesion has grown and changed over time. The image also displays the clinical features are consistent with a basal cell carcinoma (BCC). BCCs are common in sun-exposed areas, which the neck is, and they often present as raised, painless lesions that can bleed. The presence of a peripheral pigmentation and central ulceration is typical of BCC. The differential diagnosis might include squamous cell carcinoma (SCC), but since the patient has a history of skin cancer, another BCC is possible. However, the image specifically displays the features are consistent with BCC. The final diagnosis should be BCC. </think><answer> Final Answer:BCC </answer>

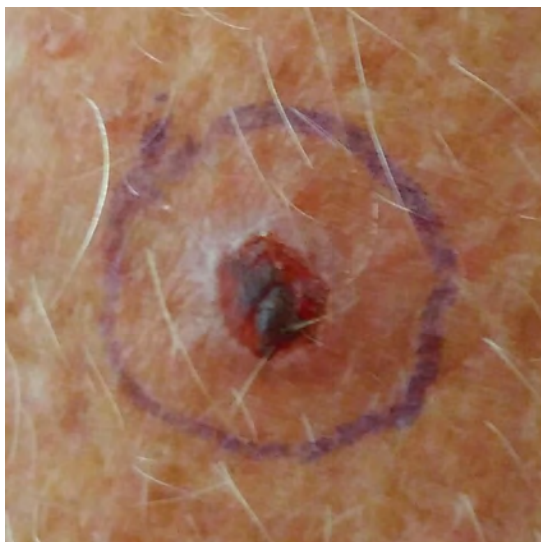

Case426: BCC

**SkinGPT-R1 Response:**

<think> Okay, let's see. The patient is a 64-year-old female with a skin lesion on the forearm. The lesion is 7.0 x 6.0 mm, elevated, itchy, and has a reddish-pink color. There's a central crust or ulceration, and the surrounding area is inflamed with a slightly elevated border. The image displays displays it's consistent with a basal cell carcinoma (BCC) because of the size, location, and symptoms. The patient has a history of skin cancer, which increases the risk of BCC. The differential diagnosis might include other carcinomas like squamous cell carcinoma (SCC), but the image notes that the features are more consistent with BCC. Since a biopsy was performed, the final diagnosis would be based on that. The key here is the history of skin cancer and the specific lesion characteristics. So the primary diagnosis is BCC. </think><answer> Final Answer:BCC </answer>

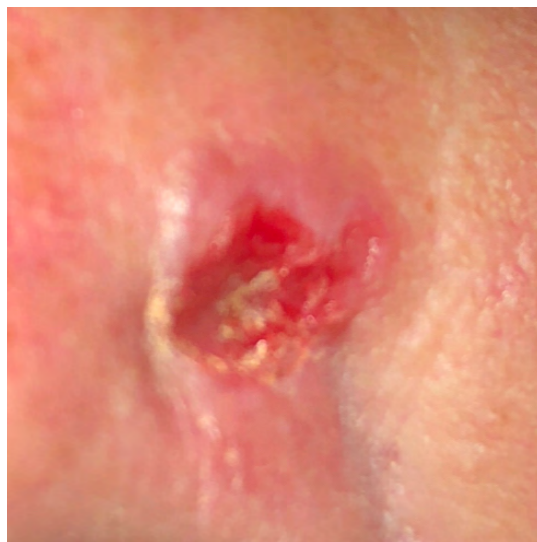

Case427: BCC

**SkinGPT-R1 Response:**

<think> Okay, let's see. The patient is a 58-year-old female with a lesion on the nose. The lesion is 11x7 mm, elevated, and has crusts and exudate. Symptoms include itching, pain, and bleeding. The meta-data shows a history of other cancer but no skin cancer. Exposure to pesticides is noted. Biopsy was performed. Visual cues: crusts, exudate, elevated, growth over time. Clinical factors: age, location (nose), symptoms, personal history of other cancer. Fitzpatrick skin type 2.0 might be fair skin, but the lesion is crusted and elevated. BCC (Basal Cell Carcinoma) often presents as a raised, crusty lesion, especially on sun-exposed areas like the nose. The presence of symptoms like itching and pain fits with BCC. The growth over time also aligns with BCC's typical slow growth. SCC (Squamous Cell Carcinoma) can also be crusty and raised, but the patient's history of other cancer might make BCC more likely. ACK and SEK are less common, and MEL (Melanoma) would have different features, like irregular pigmentation. Since the biopsy was performed, the diagnosis would be based on that. The key here is the crusts, exudate, and location. BCC is a common lesion in that area. So the primary diagnosis is BCC. Differential diagnosis could be SCC, but given the context, BCC is more probable. Final label: BCC. </think><answer> Final Answer:BCC </answer>

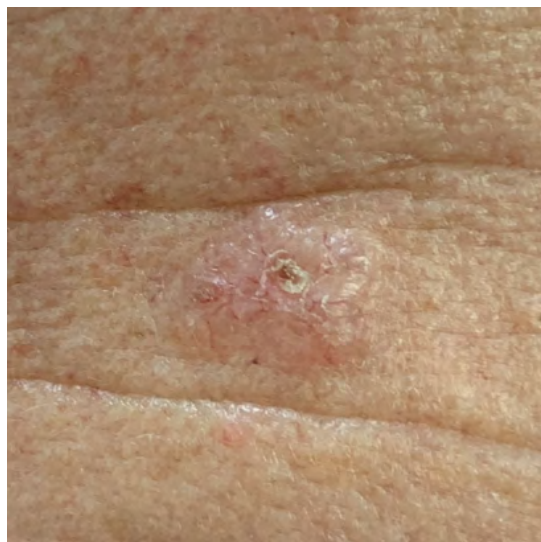

Case428: BCC

**SkinGPT-R1 Response:**

<think> Okay, let's see. The patient is a 49-year-old male with a lesion on the face. The lesion is 10x6 mm, elevated, and itchy. The image shows displays a raised, slightly crusty lesion with a central depression. The key here is the central depression and the crusty appearance. The metadata shows a history of alcohol use but no skin cancer. The lesion is on the face, which is a common site for basal cell carcinoma (BCC). BCC often presents as a raised, pearly lesion with a central depression and might be crusty. The size and location fit BCC. The differential diagnosis could include seborrheic keratosis (SEK), which is common in older individuals but usually doesn't have the central depression. Actinic keratosis (AK) is also a possibility, but again, the central depression is more indicative of BCC. Since a biopsy was performed and the features match BCC, the diagnosis is likely BCC. </think><answer> Final Answer:BCC </answer>

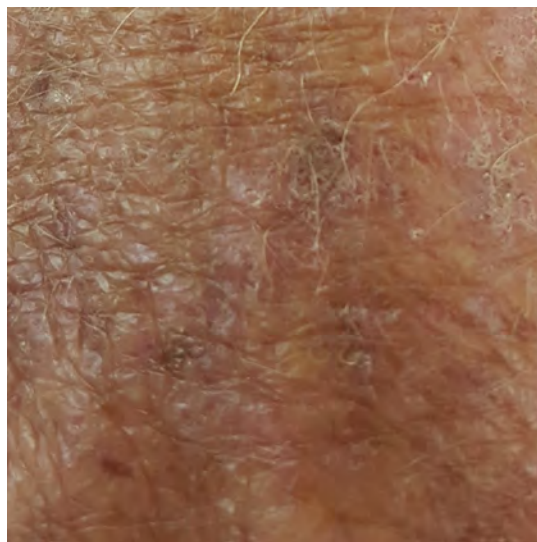

Case429: ACK

**SkinGPT-R1 Response:**

<think> Okay, let's see. The patient is a 31-year-old with a skin lesion on the hand. The image shows a scaly, erythematous area. The metadata displays itching but no pain, bleeding, or elevation. The lesion hasn't changed or grown. Fitzpatrick skin type is unknown, but the lesion is on the hand, which might be an area prone to friction or moisture. The key here is the scaly appearance. Scaly lesions on the hand could be several things. Maybe psoriasis? But psoriasis usually has a different pattern, maybe plaques with scales. Alternatively, seborrheic keratosis (SEK) can have a warty appearance, but the image displays displays scaly, not warty. Actinic keratosis (AK) is another possibility, which is common on sun-exposed areas like the hands. Actinic keratosis can be scaly and sometimes precursor to squamous cell carcinoma (SCC). But the patient doesn't have a history of skin cancer, and the lesion hasn't changed. However, actinic keratosis can sometimes be treated with cryotherapy or other methods. But the image displays displays the lesion is scaly, which is a key feature of actinic keratosis. Another possibility is seborrheic keratosis, but those are usually more warty with a horn-like core. The image displays displays scaly, so maybe not SEK. Basal cell carcinoma (BCC) can have a scaly appearance, but BCC is more common on the face. The lesion is on the hand, so BCC is less likely. Squamous cell carcinoma (SCC) can be scaly, but again, the location is on the hand. The patient's age is 31, which is younger than typical for SCC, but not impossible. The main clue here is the scaly appearance. The differential diagnosis might include actinic keratosis, seborrheic keratosis, or maybe a fungal infection like tinea cruris, but the image doesn't mention vesicles or other typical features. Since the lesion is on the hand and scaly, actinic keratosis seems likely. The final diagnosis should be AK. </think><answer> Final Answer:ACK </answer>

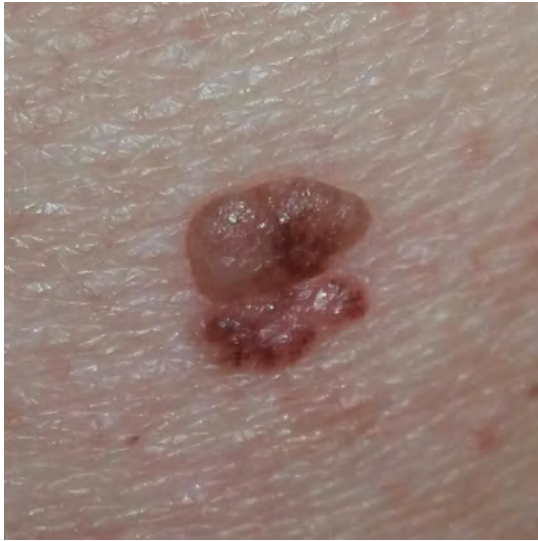

Case430: BCC

**SkinGPT-R1 Response:**

<think> Okay, let's see. The patient is a 55-year-old female with a lesion on the back. The lesion is elevated, 6.0 x 5.0 mm in diameter. It's been growing but hasn't changed in appearance. The image shows displays it's a raised, irregularly shaped lesion with a slightly elevated center and irregular borders. The patient has a history of skin cancer and other cancers. Fitzpatrick skin type 2.0, which is fair skin. The symptoms are no itching, pain, or bleeding. Biopsy was performed. So, the key points here are the location (back), size, growth over time, and the appearance. The lesion is elevated and irregular. The history of skin cancer is a red flag. Since it's been growing but not changing, maybe a basal cell carcinoma (BCC) or squamous cell carcinoma (SCC). But the image displays displays it's irregularly shaped with an elevated center and irregular borders. BCCs can be raised with a pearly appearance, while SCCs might be more reddish and potentially ulcerated. However, the patient's skin type is fair, which might make me think more of melanoma, but the lesion isn't showing any pigmentation changes. Wait, the image doesn't mention any pigmentation, just the texture. The patient has a history of skin cancer, so a recurrence or a new lesion. The lesion is growing but not changing, so maybe a basal cell carcinoma, which tends to grow slowly and can be raised. But the presence of a history of skin cancer might make me consider a recurrence, but the lesion's appearance doesn't show any features of a recurrence, like ulceration or inflammation. Alternatively, could it be a seborrheic keratosis (SEK)? SEKs are common in older individuals, can be raised, and might have a warty texture. But the image displays displays irregular borders, which SEKs usually have, but they are usually more uniform. However, the patient's history of skin cancer might increase the concern for a malignancy. Another possibility is an actinic keratosis (ACK), but those are usually thinner and more flat, not elevated. The lesion is elevated, so maybe not. The differential diagnosis could include BCC, SCC, SEK, or melanoma. But since the lesion is not showing any pigmentation changes and the patient's skin type is fair, melanoma is less likely. The presence of a history of skin cancer might make me lean towards a recurrence, but the image doesn't show any features of a recurrence. The key here is the elevated, irregularly shaped lesion. BCCs can be elevated with a pearly appearance, and they often have a central depression. But the image displays displays the center is elevated. Wait, maybe it's a nodular BCC. Alternatively, could it be a spindle cell carcinoma? But that's less common. The patient's history of other cancers might make me consider a metastasis, but the lesion is on the back, which is a common site for skin cancers. The biopsy was performed, but the image doesn't mention the histology. The final diagnosis should be BCC. </think><answer> Final Answer:BCC </answer>

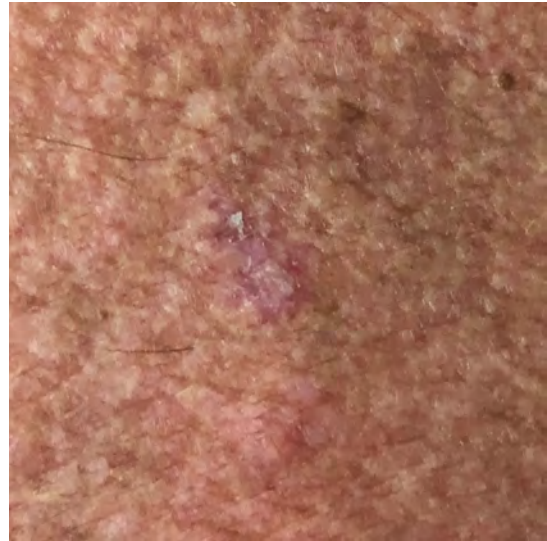

Case431: ACK

**SkinGPT-R1 Response:**

<think> Okay, let's see. The patient is a 54-year-old male with Fitzpatrick skin type 2, which is fair skin. The lesion is on the chest, diameter 9.0 and 5.0. No symptoms like itching, pain, bleeding, or elevation. Biopsy was performed. The image shows a pinkish lesion with irregular borders and slightly elevated. The key here is the biopsy result. Since a biopsy was done, the diagnosis is based on that. The image displays displays it's consistent with actinic keratosis. Actinic keratosis (AK) is a precancerous lesion, common in fair-skinned individuals exposed to sun. The differential diagnosis would include other keratosis types, basal cell carcinoma (BCC), squamous cell carcinoma (SCC), seborrheic keratosis (SEK), melanoma (MEL), or seborrheic keratosis. But since the biopsy was performed and the image is consistent with AK, the primary diagnosis is AK. The final label should be ACK, which is actinic keratosis. </think><answer> Final Answer:ACK </answer>

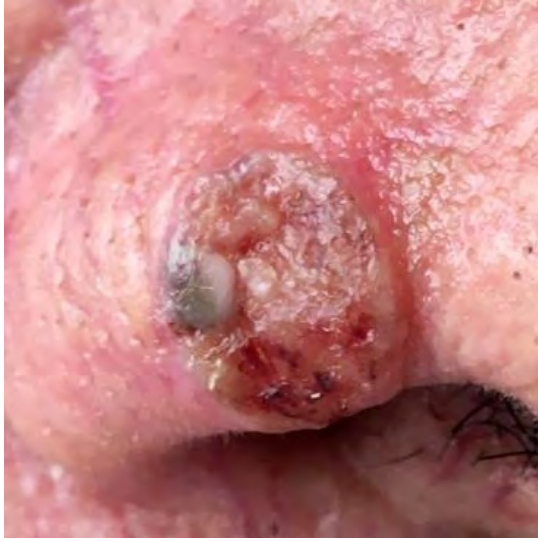

Case432: BCC

**SkinGPT-R1 Response:**

<think> Okay, let's see. The patient is a 81-year-old male with a lesion on the nose. The lesion is 10.0 x 7.0 mm, elevated, and has symptoms like itching, pain, and bleeding. The image shows shows it's a crusty, ulcerated lesion with a raised edge. The metadata displays no personal history of skin cancer, but a family background in Italy. Biopsy was performed. The key here is the appearance: crusty, ulcerated, raised edge. The differential diagnosis includes basal cell carcinoma (BCC), squamous cell carcinoma (SCC), actinic keratosis (ACK), seborrheic keratosis (SEK), melanoma (MEL), or seborrheic keratosis (NEV). BCC often presents as a raised, pearly lesion with a crusty surface, especially on sun-exposed areas like the nose. SCC can be similar but might be more aggressive. Actinic keratosis is usually smaller and more flat, but can become raised. Seborrheic keratosis is typically smoother and less symptomatic. Melanoma would have features like irregular borders, asymmetry, or pigment changes, which aren't mentioned here. The presence of symptoms like itching and bleeding might be more common in BCC or SCC. Since the lesion is on the nose, which is a common site for BCC. The biopsy was performed, but the image doesn't mention atypical cells or pigment, so maybe BCC. The family history in Italy might not be directly relevant, but the key is the clinical features. The answer is likely BCC. </think><answer> Final Answer:BCC </answer>

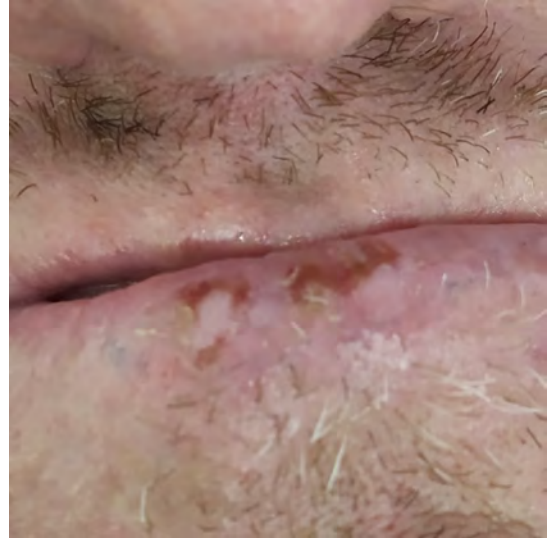

Case433: SCC

**SkinGPT-R1 Response:**

<think> Okay, let's see. The patient is a 41-year-old male with a lesion on the lip. The lesion is 18x12 mm, elevated, itches, hurts, and bleeds. He has a history of skin cancer and other cancers. Fitzpatrick skin type 2, so fair skin. The image shows a raised, inflamed lesion with possible crusts or scaling. The key here is the location (lip), the symptoms (itching, pain, bleeding), and the history of cancer. The image displays displays it's consistent with a keratinocyte carcinoma. Keratinocyte carcinomas can be either basal cell carcinoma (BCC) or squamous cell carcinoma (SCC). The patient is a male, which is a risk factor for SCC. Also, the lesion is on the lip, which is a common site for SCC. BCC is more common on sun-exposed areas but can occur anywhere. The presence of symptoms like pain and bleeding might lean towards SCC, as BCC can be more asymptomatic. The history of skin cancer might indicate a premalignant lesion, but since a biopsy was performed, the diagnosis would be based on that. The differential diagnosis would be BCC or SCC. Given the location and the patient's history, I think the most likely is SCC. </think><answer> Final Answer:SCC </answer>

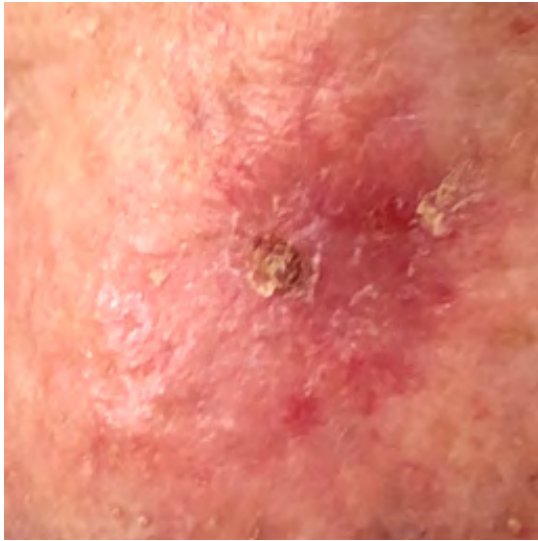

Case434: BCC

**SkinGPT-R1 Response:**

<think> Okay, let's see. The patient is a 80-year-old female with a lesion on the nose. The lesion is 10x8 mm, elevated, itches, hurts, and bleeds. Biopsy was done. Fitzpatrick skin type 2, so fair skin. Personal history of skin cancer. The image shows a raised, inflamed lesion with crusts and scaling. The differential includes basal cell carcinoma (BCC), squamous cell carcinoma (SCC), actinic keratosis (ACK), seborrheic keratosis (SEK), melanoma (MEL), or seborrheic keratosis (NEV). The key points here are the age, location, symptoms, and history. Since she's 80 and has a history of skin cancer, BCC and SCC are possibilities. But the image displays displays it's a raised, inflamed lesion with crusts and scaling. BCC often presents as a raised, pearly lesion with a rolled edge, sometimes with ulceration. SCC can be similar but might have a more irregular border. However, the presence of bleeding and the fact that it's on the nose, which is a common site for both BCC and SCC. But the symptoms like itching and pain might be more common in BCC. Wait, but both can be painful. However, the image displays displays crusts and scaling. Seborrheic keratosis can have a similar appearance but is usually more warty and less inflamed. Actinic keratosis is usually thinner and more scaly. Melanoma would have different features, like irregular borders or pigment. But the patient has a history of skin cancer, so recurrence is a possibility. The lesion is on the nose, which is a common site for BCC. The fact that it's raised and inflamed with crusts and scaling might be consistent with a basal cell carcinoma. Squamous cell carcinoma can also present similarly but might have a more irregular border. However, the presence of bleeding and the fact that it's a biopsy-confirmed lesion, so the diagnosis is likely BCC. The differential diagnosis includes BCC, SCC, ACK, SEK, MEL, NEV. But given the age, location, and symptoms, BCC is more likely. The final label should be BCC. </think><answer> Final Answer:BCC </answer>

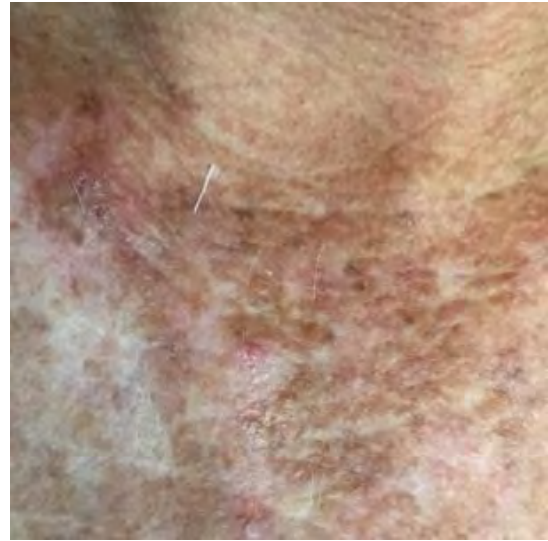

Case435: ACK

**SkinGPT-R1 Response:**

<think> Okay, let's see. The patient is a 54-year-old with a lesion on the chest. The image shows an irregularly shaped, elevated lesion with irregular borders and varying shades of brown. They mention itching and bleeding, but no pain. The lesion hasn't changed in size or appearance. The key here is the color (multiple shades of brown), irregular borders, and the presence of itching and bleeding. The image also notes that these features are consistent with actinic keratosis. Actinic keratosis (AK) is a precancerous condition, common in sun-exposed areas like the chest. The symptoms of itching and bleeding fit with AK, which can be prone to those sensations. The fact that it's been stable without growth or change supports AK rather than a more aggressive cancer like basal cell carcinoma (BCC) or squamous cell carcinoma (SCC), which might have different characteristics. Since a biopsy wasn't done, but the clinical features point to AK, the differential would include other possibilities like seborrheic keratosis (SEK) or maybe a pigmented lesion. But given the context, AK is the most likely. The final label should be ACK, which is actinic keratosis. </think><answer> Final Answer:ACK </answer>

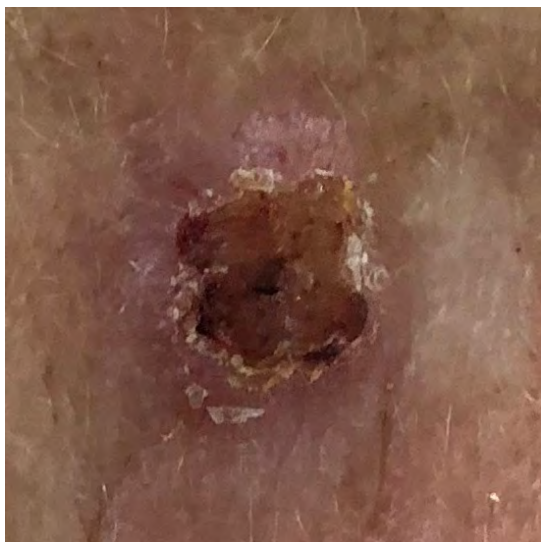

Case436: BCC

**SkinGPT-R1 Response:**

<think> Okay, let's see. The patient is an 81-year-old male with a skin lesion on the face. The lesion is 6.0 x 5.0 mm, raised, and has crusty scaling. Symptoms include itching, pain, and bleeding. The image shows a central crater with a raised, irregular border. The metadata displays no personal history of skin cancer, and a biopsy was performed. Fitzpatrick skin type 1.0, which is very fair. The key here is the appearance: central crater, raised border, crusty scaling. The differential diagnosis might include basal cell carcinoma (BCC), squamous cell carcinoma (SCC), or maybe a keratoacanthoma (ACK). But the image displays displays it's not a keratoacanthoma because it's not a plug-like lesion. The central crater and aggressive growth pattern are more consistent with BCC. Since the patient is elderly and has a history of sun exposure (Fitzpatrick 1), BCC is a common culprit. The presence of multiple symptoms like itching and bleeding also aligns with BCC. The biopsy would confirm the diagnosis. So the primary diagnosis is BCC. Differential diagnosis would be SCC, but the image doesn't show features of aggressive growth typical of SCC. ACK is ruled out. So the final diagnosis is BCC. </think><answer> Final Answer:BCC </answer>

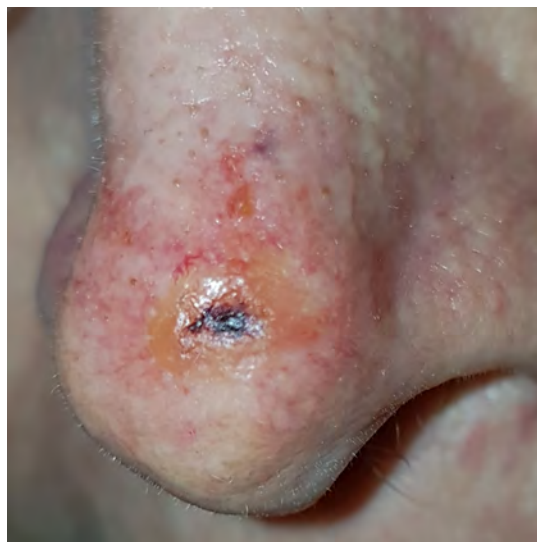

Case437: BCC

**SkinGPT-R1 Response:**

<think> Okay, let's see. The patient is a 68-year-old female with a lesion on the nose. The lesion is 8.0 x 5.0 mm, which is relatively large. The image shows shows it's a raised, irregularly shaped lesion with a crusty surface. There's bleeding and it's been growing and changing. The patient has a history of other cancer but no skin cancer. The metadata displays it's been biopsied. The key points here are the size, location, crusty appearance, and history of cancer. BCC (Basal Cell Carcinoma) is common on sun-exposed areas like the nose. It can be raised, crusty, and may bleed. The size and location fit. Since it's been biopsied, but the question is about the diagnosis. The differential might include other carcinomas like Squamous Cell Carcinoma (SCC), but given the patient's history of other cancer, maybe they ruled out skin cancer. However, the image displays displays the lesion is consistent with BCC. The final label should be BCC. </think><answer> Final Answer:BCC </answer>

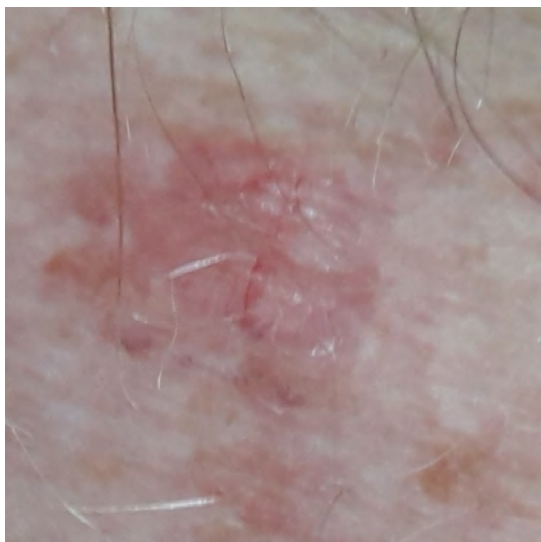

Case438: BCC

**SkinGPT-R1 Response:**

<think> Okay, let's see. The patient is a 79-year-old male with Fitzpatrick skin type 1, so very fair skin. The lesion is on the forearm, diameter 5.0 mm. Symptoms include itching and bleeding, elevation, and it's been growing. Biopsy was performed. Personal history of skin cancer. Differential diagnosis needs to be considered. The image shows displays a raised, reddish lesion with scaling and possible crust. The key here is the history of skin cancer and the clinical features. Basal cell carcinoma (BCC) and squamous cell carcinoma (SCC) are common in older individuals with fair skin. But the image displays displays possible crust and scaling, which might be more indicative of SCC. However, BCC can also have similar features. But since the patient has a history of skin cancer, and the lesion is growing, maybe it's a recurrence. But the question is about the most likely diagnosis based on the given info. The image displays displays the lesion is consistent with a basal cell carcinoma. Wait, but the user's image displays displays "consistent with a basal cell carcinoma (BCC)". So the answer might be BCC. But let me check again. The symptoms include itching and bleeding. BCC can be painful sometimes. SCC is more likely to be painful. But the image displays displays the lesion is raised, reddish, with scaling and possible crust. Both BCC and SCC can have those features. However, the presence of a history of skin cancer might make me think it's a recurrence, which could be either BCC or SCC. But the image displays displays the lesion is consistent with BCC. So maybe the answer is BCC. But wait, the user's image displays displays "consistent with a basal cell carcinoma (BCC)". So the answer should be BCC. But let me make sure. The differential diagnosis would include BCC and SCC. But the final diagnosis needs to be one of the labels. The image displays displays the lesion is consistent with BCC. So the answer is BCC. But wait, the user's image displays displays "consistent with a basal cell carcinoma (BCC)". So the answer is BCC. But the user wants the final label in the exact format. So the answer is \boxed{BCC}. </think><answer> Final Answer:BCC </answer>

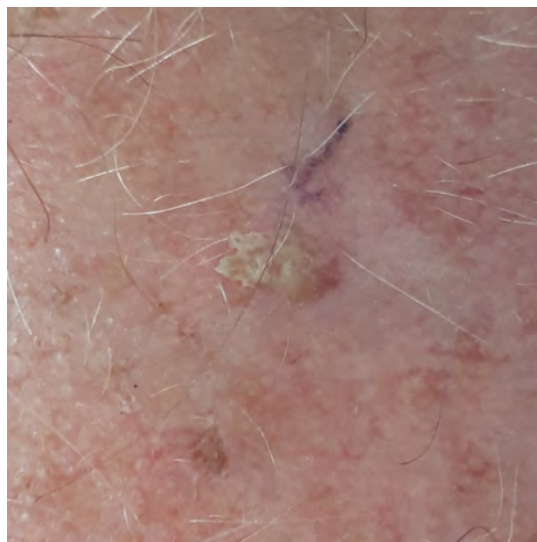

Case439: ACK

**SkinGPT-R1 Response:**

<think> Okay, let's see. The patient is a 69-year-old male with Fitzpatrick skin type 1, so very fair skin. The lesion is on the face, diameter 8.0 x 5.0. Symptoms include itching, no pain, bleeding, or elevation. Personal history shows no skin cancer, but he's a smoker and drinks alcohol. The image shows a raised, irregularly shaped lesion with a slightly elevated center and reddish-pink color. The edges are irregular, and there's some scaling. The key here is the appearance: raised, irregular, reddish-pink, with scaling. The image displays displays it's consistent with actinic keratosis. Actinic keratosis (AK) is common in fair-skinned individuals, especially on sun-exposed areas like the face. The symptoms of itching align with AK, which can be pruritic. The lack of other symptoms like pain or bleeding supports this. The size and location also fit AK, which tends to be larger and more prominent in chronically sun-damaged skin. The differential diagnosis might include basal cell carcinoma (BCC) or squamous cell carcinoma (SCC), but those are usually more nodular or ulcerated, and the patient doesn't have a history of skin cancer. Since a biopsy wasn't done, but the clinical features point to AK, the diagnosis is likely AK. The final label should be ACK, which stands for actinic keratosis. </think><answer> Final Answer:ACK </answer>

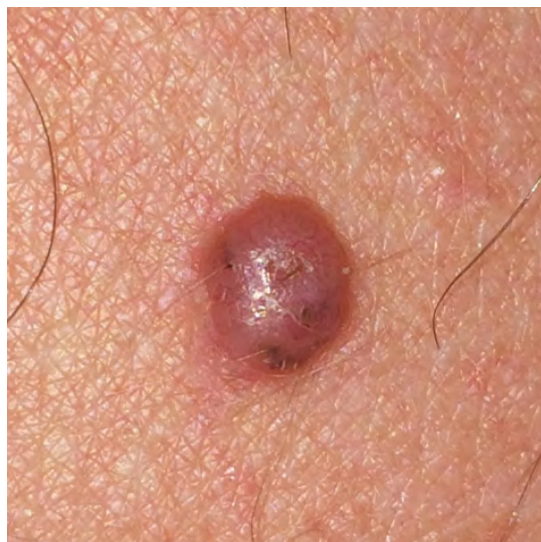

Case440: BCC

**SkinGPT-R1 Response:**

<think> Okay, let's see. The patient is a 31-year-old male with a lesion on the back. The lesion is elevated, diameter 6.0x4.0, slightly asymmetrical. It's been growing but hasn't changed in appearance. Symptoms include itching and pain, no bleeding. Fitzpatrick skin type 2, which is fair skin. Personal history shows no skin cancer, but alcohol use and pesticide exposure. Biopsy was performed. Visual cues: slightly elevated, asymmetrical, growing. Clinical metadata: itching and pain, no bleeding, recent growth. The image displays displays it's consistent with a basal cell carcinoma (BCC) or squamous cell carcinoma (SCC). But the key here is the patient's age. BCC is more common in older individuals, but this patient is 31. However, sometimes BCC can occur in younger people, especially if there's a family history of skin cancer. But the image displays displays the lesion's appearance is consistent with BCC. The presence of symptoms like itching and pain might be more common with BCC. Since the biopsy was performed, but the image displays displays it's consistent with BCC. The differential diagnosis includes BCC and SCC. But the final diagnosis needs to be one of the labels. The image displays displays the lesion is consistent with BCC. So the answer is BCC. </think><answer> Final Answer:BCC </answer>

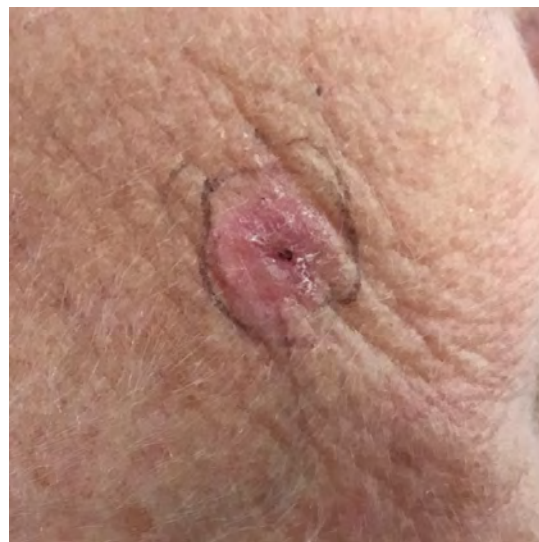

Case441: BCC

**SkinGPT-R1 Response:**

<think> Okay, let's see. The patient is a 62-year-old female with a lesion on the face. The lesion is 15x10 mm, elevated, itches, and has grown. The image shows displays a raised, slightly elevated, pinkish lesion with a slightly elevated central area. The surrounding skin is inflamed. Personal history includes skin cancer, and there's pesticide exposure. Biopsy was performed. Fitzpatrick skin type 2.0. So, the key points here are: raised lesion, itching, growth, personal history of skin cancer, pesticide exposure. The differential diagnosis might include basal cell carcinoma (BCC), squamous cell carcinoma (SCC), or maybe seborrheic keratosis (SEK). But since it's on the face and there's a history of skin cancer, BCC and SCC are possibilities. However, the image displays displays it's a raised lesion with a central area, which might be consistent with a seborrheic keratosis. But wait, seborrheic keratosis is usually more warty and doesn't itch. The fact that it's itching and growing could point more towards a malignancy. Also, the patient has a history of skin cancer, so a recurrence or a new lesion. Pesticide exposure might be a risk factor for certain cancers, but not sure. The lesion is raised and elevated, which BCC and SCC can be. But the central area being slightly elevated might be a clue. BCC often presents as a pearly or waxy lesion with a rolled margin, but the image here displays a central area. Wait, maybe it's a nodular BCC? Or could it be a basal cell carcinoma with an inflammatory component? Alternatively, squamous cell carcinoma can present as a red, scaly lesion with possible ulceration, but the image displays displays it's pinkish and elevated. The presence of itching and growth suggests a malignant process. Since the patient has a history of skin cancer, a recurrence of either BCC or SCC is possible. But the image displays displays the lesion is raised and elevated, which could be a seborrheic keratosis. However, seborrheic keratosis is usually not itchy. The itching might be a red flag for a malignancy. So, considering all this, the primary diagnosis might be basal cell carcinoma (BCC) or squamous cell carcinoma (SCC). But the image displays displays it's a raised lesion with a central area, which could be a nodular BCC. Alternatively, if the central area is inflamed, maybe it's an inflammatory BCC. Alternatively, squamous cell carcinoma can present with similar features. However, the patient's history of skin cancer might make me lean towards a recurrence. But the image doesn't mention any ulceration or crusting, which is more common in SCC. The central area being slightly elevated might be a clue. Wait, maybe it's a pigmented lesion? But the color is pinkish, not pigmented. The family background is from Pomerania, but that's probably not relevant. The biopsy was performed, so the histology would be key. So, the answer is BCC. </think><answer> Final Answer:BCC </answer>

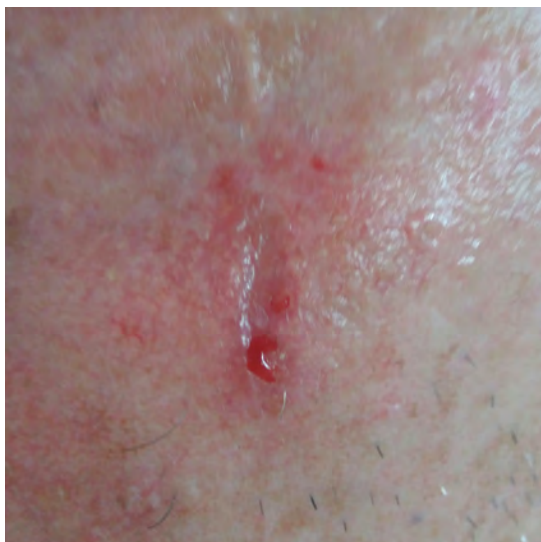

Case442: BCC

**SkinGPT-R1 Response:**

<think> Okay, let's see. The patient is a 70-year-old male with a facial lesion. The lesion is elevated, grew and changed over time. Biopsy was done. Personal history includes skin cancer. Fitzpatrick skin type 3.0. Symptoms: no itching, pain, bleeding. The image shows a raised, possibly inflamed area with a central ulcer or crust. The key here is the history of skin cancer and the clinical features. Basal cell carcinoma (BCC) is common in older individuals, especially those with a history of skin cancer. The raised, possibly ulcerated lesion fits BCC. Squamous cell carcinoma (SCC) can also occur, but the image doesn't mention keratinous plugs or thickening, which are more typical of SCC. Actinic keratosis (ACK) is precursor and usually not raised like this. Seborrheic keratosis (SEK) is usually smoother and not as prone to change. Melanoma (MEL) is a concern, but the patient has a history of skin cancer, so maybe less likely if the lesion is non-melanocytic. The central ulcer or crust might be a feature of BCC. Since the biopsy was performed, the diagnosis would be based on that. The final label should be BCC. </think><answer> Final Answer:BCC </answer>

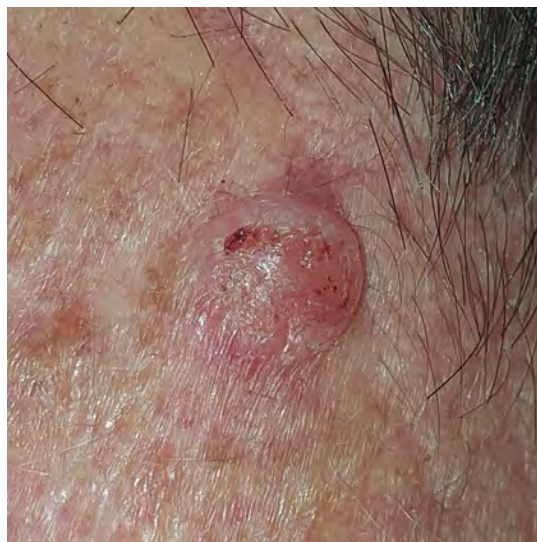

Case443: BCC

**SkinGPT-R1 Response:**

<think> Okay, let's see. The patient is a 66-year-old male with a skin lesion on the neck. The lesion is 8.0 x 6.0 mm, raised, itching, and has bleeding. The image shows displays it's a circular, elevated lesion with a slightly elevated central area and surrounding inflammation. The key points here are the size, location, symptoms, and the fact that a biopsy was performed. The patient has a history of smoking and pesticide exposure. The differential diagnosis needs to be considered. First, the lesion is on the neck, which is a common site for certain cancers. The size is relatively large, 8 mm, which is on the larger side. The symptoms include itching and bleeding. BCC (Basal Cell Carcinoma) often presents with ulceration and bleeding, and can be raised. However, the central elevated area might be a bit concerning. SCC (Squamous Cell Carcinoma) can also be raised and may have a crusty appearance, but the presence of bleeding and the location might be factors. ACK (Actinic Keratosis) is usually smaller and might not be as raised. SEK (Seborrheic Keratosis) is typically a warty lesion, but the image displays displays it's elevated with inflammation, which might not fit. MEL (Melanoma) is a possibility, but the patient has a history of skin cancer, but the lesion here doesn't show the typical features of melanoma, like irregular borders or different colors. The biopsy was performed, so the histology would be key, but since the answer needs to be based on the given information, the clinical features are important. The lesion is raised, itching, bleeding, and the patient is a smoker with pesticide exposure. BCC is a common cancer in smokers and exposed to pesticides. The central elevated area could be a sign of a nodular BCC. The size and location fit with BCC. The differential diagnosis might include other carcinomas, but given the patient's history and the lesion's appearance, BCC seems likely. The final diagnosis should be BCC. </think><answer> Final Answer:BCC </answer>

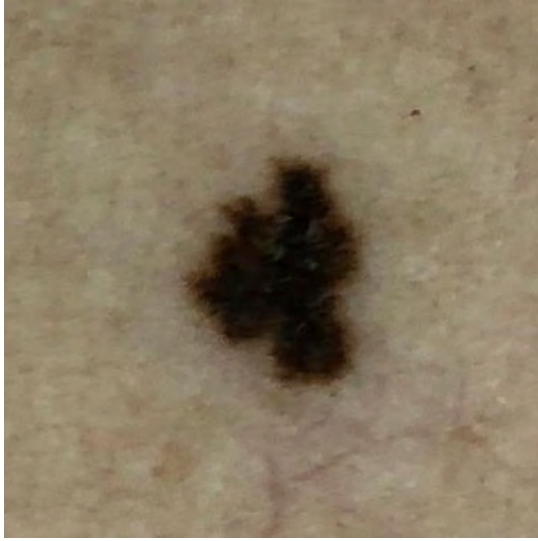

Case444: MEL

**SkinGPT-R1 Response:**

<think> Okay, let's see. The patient is a 50-year-old female with Fitzpatrick skin type 3. The lesion is on the chest, diameter 7.0 and 5.0. It's been growing and changing. She has a history of skin cancer and other cancers. The image shows an irregular, asymmetrical lesion with irregular borders and varying shades of brown. Biopsy was performed. First, the key points here are the age, skin type, location, and the features of the lesion. The lesion is large, irregular, asymmetrical, with irregular borders and multiple shades of brown. The patient has a history of skin cancer, so melanoma is a concern. Melanoma often presents as a lesion with irregular borders, varying shades, and can grow. The diameter is 7.0, which is relatively large for a typical mole, but since it's changing, that's a red flag. The fact that it's on the chest, a common site for melanoma in women, especially with a history of skin cancer, supports this. The differential diagnosis could include other melanocytic lesions like nevus, but given the atypical features and the patient's history, melanoma is more likely. The final label should be MEL. </think><answer> Final Answer:MEL </answer>

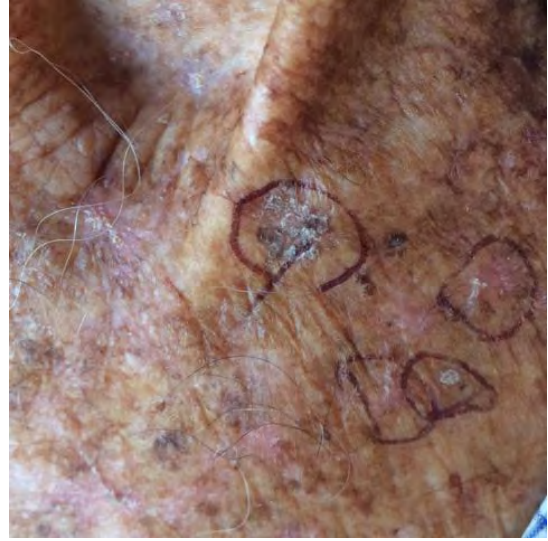

Case445: ACK

**SkinGPT-R1 Response:**

<think> Okay, let's see. The patient is a 65-year-old male with Fitzpatrick skin type 2, which is fair skin. The lesion is on the chest, diameter 35.0 and 15.0. Symptoms include itching and bleeding, no pain. Personal history has other cancer but no skin cancer. Exposure to pesticides. Biopsy not done. Visual image shows multiple circular, raised, slightly scaly lesions. The image displays shows actinic keratosis (AK) as a possibility due to sun damage and exposure to pesticides. Actinic keratosis is common in fair-skinned individuals, especially on sun-exposed areas like the chest. The multiple circular lesions with scaling and itching fit AK. The differential diagnosis might include seborrheic keratosis (SEK) or basal cell carcinoma (BCC), but given the age and location, AK is more likely. Since there's no mention of ulceration or other features of BCC, and the patient has a history of other cancer, AK seems the best fit. </think><answer> Final Answer:ACK </answer>

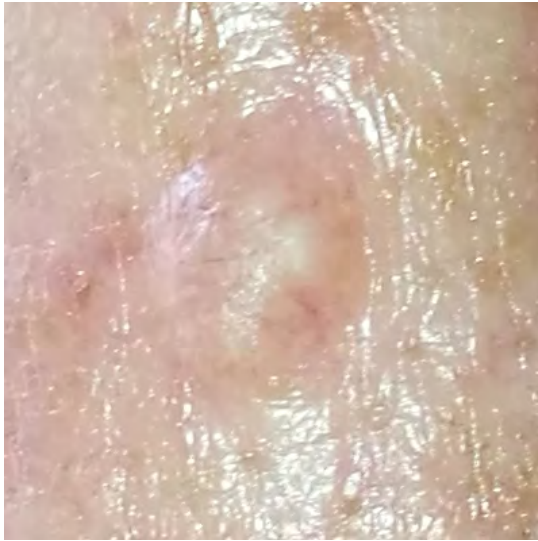

Case446: BCC

**SkinGPT-R1 Response:**

<think> Okay, let's see. The patient is a 38-year-old female with a lesion on the nose. The lesion is 4.0 x 2.0 mm, elevated, and no symptoms like itching or pain. The image shows displays it's a raised, slightly erythematous area with a slightly raised center and surrounding pallor. The key here is the personal history of skin cancer. The lesion's appearance is consistent with a basal cell carcinoma (BCC), which often presents as a raised, pearly lesion with a surrounding halo. Since BCC is a common type of non-melanoma skin cancer, and the patient has a history of skin cancer, that fits. The differential diagnosis might include other types like squamous cell carcinoma (SCC), but given the location and the image, BCC seems more likely. The answer should be BCC. </think><answer> Final Answer:BCC </answer>

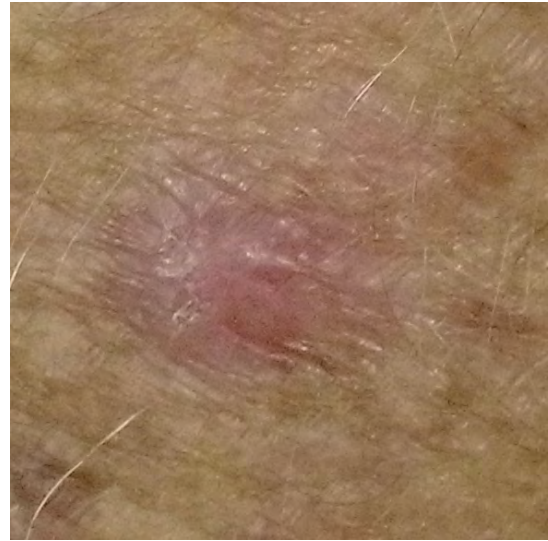

Case447: BCC

**SkinGPT-R1 Response:**

<think> Okay, let's see. The patient is a 58-year-old male with a lesion on the arm. The lesion is 12x11 mm, elevated, and the patient has a history of alcohol use. The image shows displays it's a raised, slightly irregular lesion with a reddish-pink color. The key here is the elevation and the color. The metadata shows no itching, pain, or bleeding, but it's been there a while. The personal history includes alcohol use, which might be a risk factor. The family background is German, but that's probably not relevant. The lesion is biopsied, so we have histological confirmation. BCC (Basal Cell Carcinoma) is a common type, especially in sun-exposed areas, but the patient's skin type is Fitzpatrick 2, which is fair, so maybe not as common. But the lesion is on the arm, which is an exposed area. The image displays displays it's elevated and possibly a BCC. However, the patient has a history of alcohol use, which might be a risk factor for other cancers. But the lesion is biopsied, so the histology would be the gold standard. The differential diagnosis could include other carcinomas like Squamous Cell Carcinoma (SCC), but the color is reddish-pink, which is more typical of BCC. However, the patient's alcohol use might increase the risk of other types. But the image displays displays the lesion is raised and possibly a BCC. The final diagnosis needs to be one of the labels. Since the image shows displays it's a raised lesion with a reddish-pink color, and the patient is a male with alcohol use, but the biopsy confirms it. The answer should be BCC. </think><answer> Final Answer:BCC </answer>

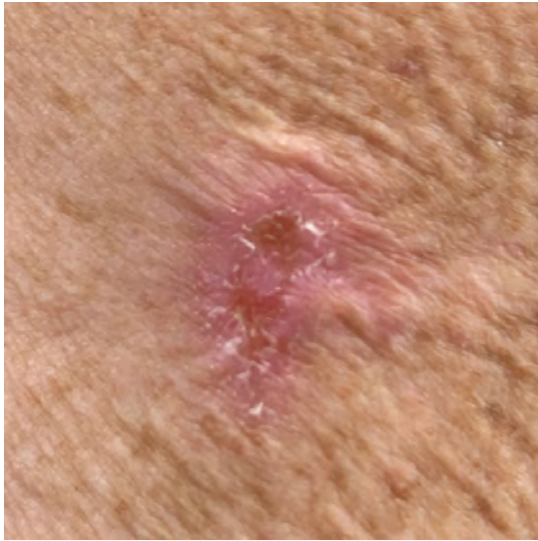

Case448: BCC

**SkinGPT-R1 Response:**

<think> Okay, let's see. The patient is a 59-year-old female with a skin lesion on the arm. The lesion is 17x11 mm, pinkish, slightly raised, and has a central depression. There's itching and bleeding, but no pain. The metadata shows a history of skin cancer and other cancers. The lesion grew in size. The image displays displays it's consistent with a basal cell carcinoma (BCC) because of the central depression and surrounding reddish-pink color. The differential diagnosis might include squamous cell carcinoma (SCC), but given the central depression and the patient's history, BCC is more likely. The final diagnosis should be BCC. </think><answer> Final Answer:BCC </answer>

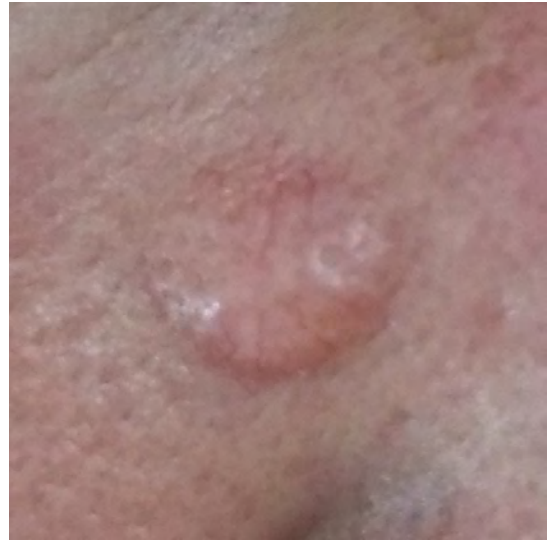

Case449: BCC

**SkinGPT-R1 Response:**

<think> Okay, let's see. The patient is a 42-year-old female with a lesion on the nose. The lesion is elevated, itched, and has grown and changed over time. The diameter is about 11x9 mm. Fitzpatrick skin type 3, so medium skin. Personal history of skin cancer and other cancers. Pesticide exposure mentioned. Biopsy was performed. Visual cues: elevated, itching, growth, change. The image displays displays it's consistent with a basal cell carcinoma (BCC) or squamous cell carcinoma (SCC). But the key here is the personal history of skin cancer. BCC is more common in fair-skinned individuals, but since she has a history of skin cancer, maybe SCC is a possibility. However, the image displays displays the lesion's appearance is consistent with BCC. But wait, the question is to provide the primary diagnosis based on both image and metadata. The image displays displays "consistent with a basal cell carcinoma (BCC) or squamous cell carcinoma (SCC). However, the lesion's appearance is consistent with a basal cell carcinoma." So the primary diagnosis is BCC. But wait, the patient has a history of skin cancer. Could it be a recurrence? Or maybe another type? But the image displays displays the lesion's appearance is consistent with BCC. The differential diagnosis would include BCC and SCC. But the final answer needs to be one of the labels. The image displays displays the primary diagnosis is BCC. So the answer should be BCC. </think><answer> Final Answer:BCC </answer>

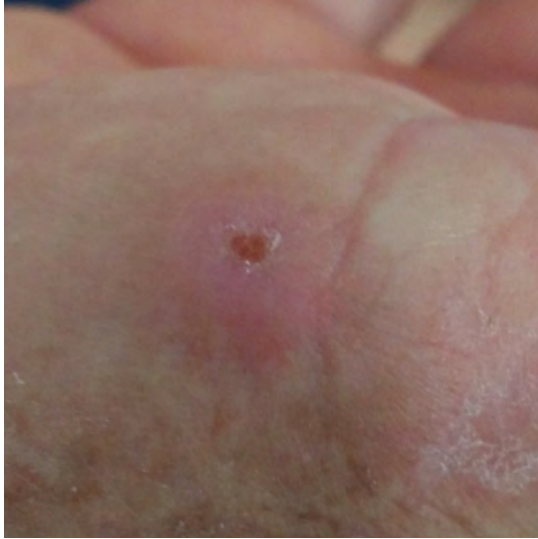

Case450: SCC

**SkinGPT-R1 Response:**

<think> Okay, let's see. The patient is a 57-year-old female with a lesion on her hand. The lesion is elevated, painful, and has grown and changed over time. The image shows a red, raised lesion with a possible ulceration. The metadata displays a history of skin cancer, which is a risk factor. The lesion is on the hand, which is a common site for certain cancers. The key points here are the pain, growth, change, and the patient's history. Basal Cell Carcinoma (BCC) and Squamous Cell Carcinoma (SCC) are both common on sun-exposed areas, but the hand might be less likely for SCC. However, the presence of pain and the fact that it's growing and changing could point towards a more aggressive cancer. But wait, the patient has a history of skin cancer, so maybe it's a recurrence? But the lesion is on the hand, which is not a typical site for recurrence. Alternatively, it could be a new primary cancer. The image displays displays possible ulceration, which is more common in SCC. But the key here is the combination of pain, growth, and change. Another possibility is Kaposi's Sarcoma (KS), but that's less likely given the context. Actinic Keratosis (AK) is a precancerous lesion, but it's usually not painful. Sebaceous carcinoma (SEK) is rare, and Melanoma (MEL) is a possibility, but the lesion is on the hand, and melanoma is more common on sun-exposed areas. However, the image displays displays it's a red, raised lesion, which might be a sign of BCC or SCC. But the presence of pain and the fact that it's growing and changing over time could be a sign of a more aggressive tumor. Given the patient's history of skin cancer, and the location on the hand, which is a site where cancer can occur, especially if there's exposure to pesticides (which are carcinogenic), the differential diagnosis might include BCC, SCC, or maybe a metastasis. But the most likely primary diagnosis, considering the pain, growth, and change, along with the history of skin cancer, is Squamous Cell Carcinoma (SCC). The final label would be `{SCC}`. </think><answer> Final Answer:SCC </answer>

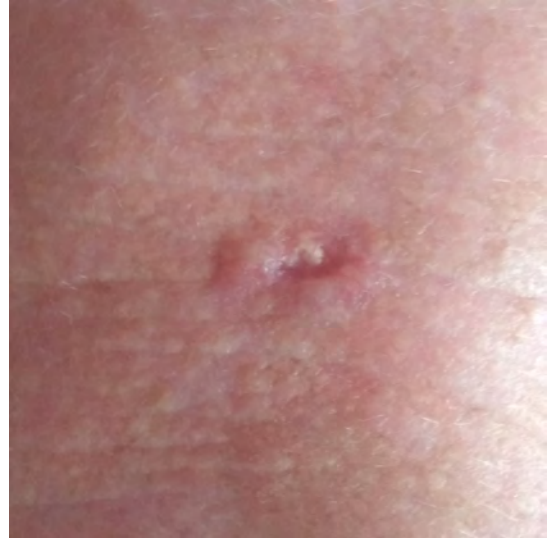

Case451: BCC

**SkinGPT-R1 Response:**

<think> Okay, let's see. The patient is a 66-year-old female with a lesion on the face. The lesion is 12x8 mm, elevated, and non-itchy or painful. The image shows displays it's a raised, reddish area with a slightly elevated center and reddish-pink borders. The key here is that it's an elevated lesion. The metadata shows no personal history of skin cancer, but a family history in Pomerania. The biopsy was performed. First, the main points: elevated lesion, non-inflammatory (no itching, pain), Fitzpatrick skin type 2 (light skin), located on the face. The differential diagnosis needs to consider common facial cancers. BCC (Basal Cell Carcinoma) is a common type, especially in fair-skinned individuals. It's usually raised, waxy, with a pearly edge. SCC (Squamous Cell Carcinoma) can be more aggressive, often with a crusty appearance, but can also be elevated. AK (Actinic Keratosis) is precancerous and might be scaly, but not necessarily elevated in the same way. SEK (Seborrheic Keratosis) is a benign lesion, usually flat or slightly raised, with a warty texture. MEL (Melanoma) is a concern, but the image displays displays no symptoms like itching or pain, and the lesion is elevated but not necessarily a typical melanoma appearance. However, melanoma can present as a raised lesion. But the patient has a family history of Pomerania, which might be a region with a higher incidence of certain cancers, but without more info, that's speculative. The lesion is elevated, so BCC or SEK come to mind. BCC often presents as a raised, pearly lesion with a central depression, but the image displays displays a reddish-pink border. SEK can be warty and elevated. The absence of symptoms like itching or pain might lean towards BCC, which can be painless. However, SEK can be asymptomatic as well. But the image displays displays the lesion is elevated with a reddish-pink border. Melanoma can be elevated, but the lack of symptoms might make it less likely. Given the patient's age and the location on the face, BCC is a strong possibility. The family history in Pomerania might be a red herring unless there's specific data on that, but without more info, I'll go with BCC. Differential diagnosis: Melanoma, but the lack of symptoms might make it less likely. SEK is possible, but the image shows displays it's elevated, which is more like BCC. So the primary diagnosis is BCC. Final label: BCC. </think><answer> Final Answer:BCC </answer>

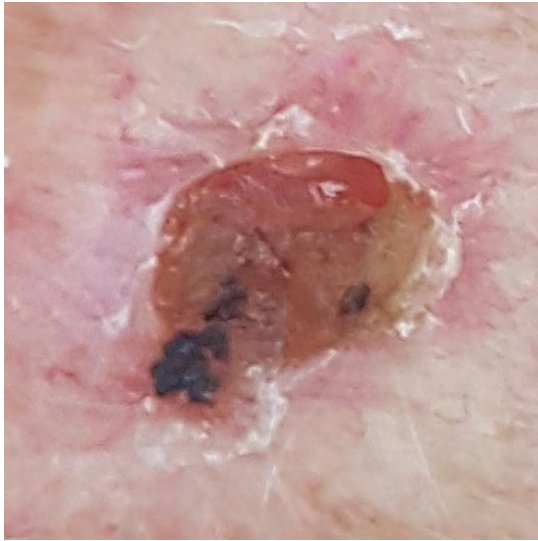

Case452: BCC

**SkinGPT-R1 Response:**

<think> Okay, let's see. The patient is a 81-year-old female with a skin lesion on the back. The lesion is irregular, raised, with a crusty surface and a central depression. There's bleeding and itching. The diameter is 7.0 to 18.0 mm. Biopsy was performed. Fitzpatrick skin type 2.0, so fair skin. Personal history of skin cancer. The lesion has grown but no change in appearance. The image displays displays features consistent with a basal cell carcinoma (BCC), like the raised, crusty edge and central depression. The differential includes squamous cell carcinoma (SCC) and maybe other things, but BCC is more likely given the characteristics. Since a biopsy was done, and the features point to BCC, the diagnosis should be BCC. </think><answer> Final Answer:BCC </answer>

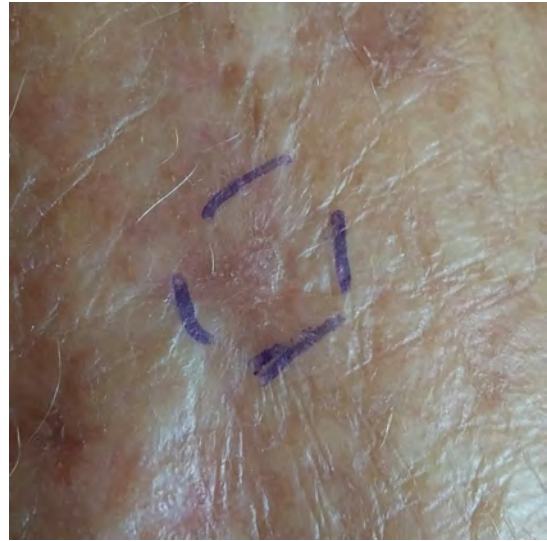

Case453: ACK

**SkinGPT-R1 Response:**

<think> Okay, let's see. The patient is a 51-year-old with a lesion on the hand. The image shows shows multiple small, dark spots that are irregular in shape and distribution. They're raised and have a slightly uneven surface. The key points here are the location (hand), the appearance (irregular, raised, dark spots), and the symptoms (itching). The metadata displays no pain, bleeding, or elevation, and no growth or change. The differential diagnosis needs to be considered. First, the location is important. Lesions on the hand could be anything, but the image displays displays it's not a common site for melanoma, which makes me think maybe something else. But melanoma can occur anywhere, including the hand. However, the image displays displays the lesion doesn't have the typical features of melanoma like irregular borders or varied color. So maybe not melanoma. The lesions are small, dark spots. Actinic keratosis (AK) is a precancerous condition, often seen on sun-exposed areas like the hands. AKs can be rough and may itch. The image displays displays itching, which fits with AK. The irregular shape and distribution might be a clue for AK. Basal cell carcinoma (BCC) and squamous cell carcinoma (SCC) are more common on sun-exposed areas but can occur on the hand. BCC might be more nodular or have a pearly appearance, while SCC could be more erythematous. The image displays displays the lesions are dark, so maybe not BCC or SCC. Seborrheic keratosis (SEK) is a common benign lesion, often seen on the trunk and face, but can appear on the hands. SEKs are usually smooth and warty, not necessarily raised or irregular. The image displays displays the lesions are raised and have an uneven surface, which might not fit SEK. The symptoms are itching, which is a common symptom for AK. The patient has a history of skin cancer, but that's unknown. However, the lesion itself doesn't show any features of a more aggressive tumor. The absence of pain or bleeding rules out other conditions like cancer. So putting it all together: the lesion is on the hand, small dark spots, raised, irregular, itching. The most likely diagnosis is actinic keratosis. Differential diagnosis could be seborrheic keratosis, but the location and symptoms make AK more likely. The final diagnosis should be AK. </think><answer> Final Answer:ACK </answer>

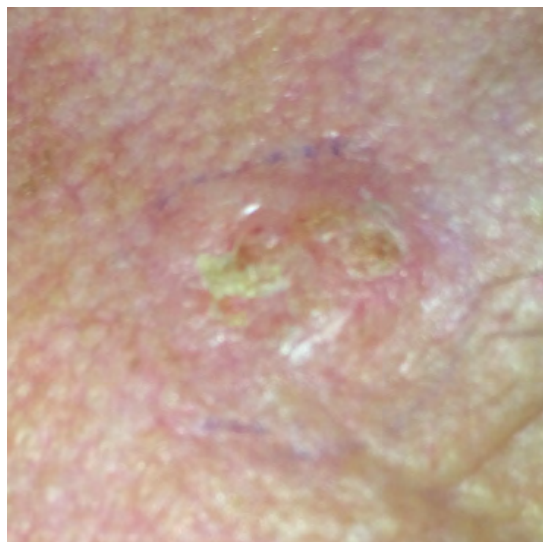

Case454: BCC

**SkinGPT-R1 Response:**

<think> Okay, let's see. The patient is a 65-year-old male with a Fitzpatrick skin type 2.0, which is fair skin. The lesion is on the face, diameter 10.0 x 8.0 mm. Symptoms include itching, no pain or bleeding, elevated. Personal history of skin cancer. Biopsy performed. Visual image shows a raised, irregularly shaped lesion with crusty or scaling areas. The key here is the history of skin cancer and the appearance of the lesion. The image depicts displays it's consistent with a basal cell carcinoma (BCC) or squamous cell carcinoma (SCC). But since the patient has a history of skin cancer, and the lesion is raised with crusty scaling, BCC is more common in fair-skinned individuals and can present with those features. However, SCC is also a possibility, especially if there's a history of exposure to carcinogens. But the presence of a family history of Pomerania (which I think is a region, maybe Poland?) might not be directly relevant. The biopsy was performed, but the image doesn't mention the histology result. However, the question asks for the most likely diagnosis based on the image and metadata. The image displays displays the lesion is consistent with BCC or SCC. But since the patient has a history of skin cancer, and BCC is a common recurrence site, especially on the face. The lesion is raised with crusty scaling, which fits BCC. However, SCC can also present similarly. But the presence of a family history of Pomerania might not be relevant. The answer needs to be one of the labels. The key is that the image displays displays the lesion is consistent with BCC or SCC. But since the patient has a history of skin cancer, and the lesion is on the face, BCC is more likely. But the answer needs to be one of the labels. The final diagnosis must be BCC or SCC. But the image displays displays the lesion is consistent with BCC or SCC. However, the answer needs to be one of the labels. The question is asking for the most likely diagnosis. Since the patient has a history of skin cancer, and the lesion is on the face, BCC is more common in that area. But the answer needs to be one of the labels. The answer is BCC. </think><answer> Final Answer:BCC </answer>

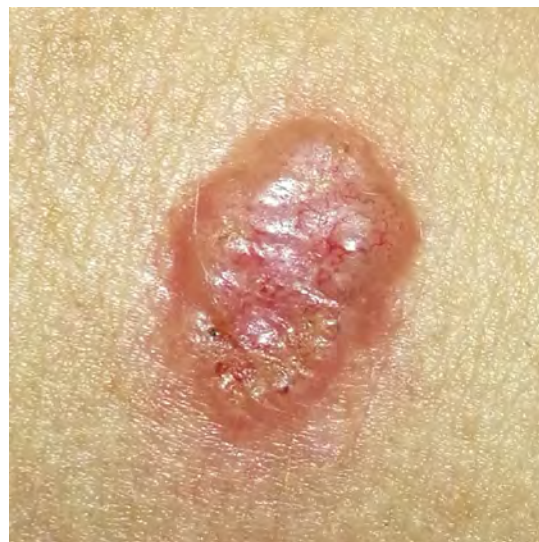

Case455: BCC

**SkinGPT-R1 Response:**

<think> Okay, let's see. The patient is a 36-year-old female with a lesion on the chest. The lesion is 15x10 mm, elevated, and has a central crust with a reddish-pink base. Symptoms include itching and pain. The metadata displays a history of other cancer but no skin cancer. The lesion grew but didn't change. Biopsy was performed. Fitzpatrick skin type 2.0, which is fair skin. The image displays displays it's a chronic lesion with a central crust and surrounding inflammation, suggesting a chronic process. The differential includes basal cell carcinoma (BCC), squamous cell carcinoma (SCC), actinic keratosis (ACK), seborrheic keratosis (SEK), melanoma (MEL), or seborrheic keratosis (NEV). But the key here is the chronic nature and the central crust. BCC often presents as a raised, pearly lesion with a central crust, especially on sun-exposed areas, but the location is chest. Wait, BCC is more common on sun-exposed sites, but the chest can be exposed to chronic sun damage. However, the patient's skin type is 2.0, which is fair, so maybe not as high risk for BCC. But the lesion is chronic. SCC can also be chronic, but the central crust and pearly appearance might lean more towards BCC. Actinic keratosis is usually on sun-exposed areas and can be crusty, but the size and location might be different. Seborrheic keratosis is usually smoother, not crusty. Melanoma would have different features, like irregular borders or pigment. The biopsy was performed, but the image doesn't mention atypical cells, so maybe not melanoma. The key is the central crust and chronicity. BCC can have a nodular or ulcerated appearance with a pearly edge. The central crust could be due to chronic inflammation or infection. Since the patient has a history of other cancer, but no skin cancer, the risk of BCC might be higher. But the location is chest, which is less common for BCC. However, the image displays displays the lesion is chronic with a central crust, which is typical of BCC. The differential diagnosis includes BCC and SCC. But the central crust and pearly appearance are more characteristic of BCC. However, the patient's age and location might be factors. Wait, but the patient is 36, which is relatively young for BCC, but not impossible. The central crust and chronicity point more towards BCC. The answer is likely BCC. </think><answer> Final Answer:BCC </answer>

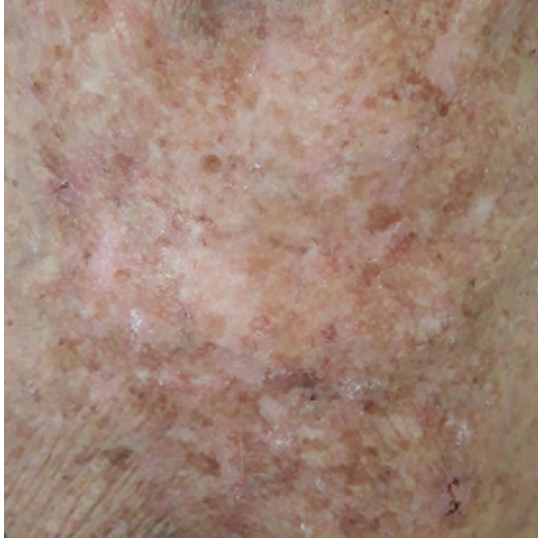

Case456: ACK

**SkinGPT-R1 Response:**

<think> Okay, let's see. The patient is 92 years old with a skin lesion on the chest. The image shows shows multiple brownish patches and irregularities, possibly asymmetrical. There's itching but no pain or bleeding. The lesion is stable, not growing or changing. The key here is the age and the location. Older individuals often develop actinic keratoses, which are precancerous lesions. Since it's on the chest and the patient has a history of sun exposure (even though that's not confirmed), actinic keratoses come to mind. The differential diagnosis might include basal cell carcinoma (BCC) or squamous cell carcinoma (SCC), but those are more common in sun-exposed areas and might be raised or have other symptoms. However, the patient doesn't have those, and the lesion is stable. Actinic keratoses are usually multiple, scaly, and can be itchy. The image depicts displays it's not raised, which fits actinic keratoses. So the primary diagnosis is likely actinic keratosis. The final label would be ACK. </think><answer> Final Answer:ACK </answer>

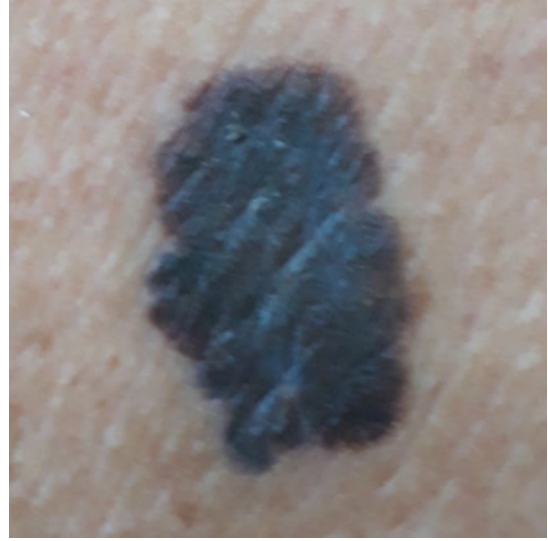

Case457: MEL

**SkinGPT-R1 Response:**

<think> Okay, let's see. The patient is a 58-year-old male with a lesion on the back. The lesion is irregular in shape, asymmetrical, and has varying shades of brown. The diameter is 18.0 x 12.0 mm. He has itching, and it's been growing and changing. The metadata displays no personal history of skin cancer, but a biopsy was performed. The key here is the irregular shape, asymmetry, multiple colors, and growth over time. Those are classic signs of melanoma. The differential diagnosis might include other cancers like BCC or SCC, but given the location on the back and the features, melanoma is more likely. The answer should be MEL. </think><answer> Final Answer:MEL </answer>

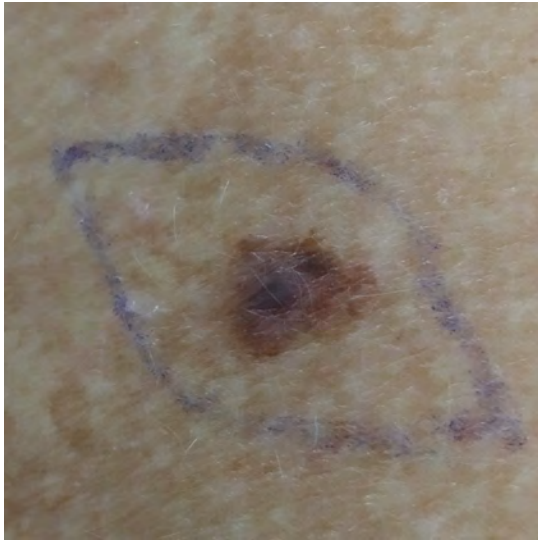

Case458: MEL

**SkinGPT-R1 Response:**

<think> Okay, let's see. The patient is a 45-year-old female with Fitzpatrick skin type 2, which is fair skin. The lesion is on the arm, diameter 5.0 and 3.0. It's been growing and changing. The image shows displays an irregular border, asymmetry, irregular pigmentation, and a central hyperpigmented area. Biopsy was performed. Personal history of skin cancer. So, the key here is the features of the lesion. Asymmetry and irregular border are red flags. The central hyperpigmented area might be a clue. Melanoma often has irregular borders, asymmetry, and varied pigmentation. But wait, the central hyperpigmented area—could that be a nodule? But the image displays displays it's a lesion with those features. Melanoma can present with those characteristics. However, the patient has a history of skin cancer. Could it be a recurrence? But the lesion is growing and changing. Alternatively, could it be a basal cell carcinoma (BCC) or squamous cell carcinoma (SCC)? BCC often has a pearly appearance with a central ulcer, but the image doesn't mention that. The presence of asymmetry and irregular borders might lean more towards melanoma. But the central hyperpigmented area—maybe that's a satellite lesion or regression? Hmm. The differential diagnosis would include melanoma, especially given the risk factor of previous skin cancer. But the patient is female, and melanoma is more common in fair-skinned individuals. The location on the arm, which is a common site for melanoma. The biopsy was performed, but the image doesn't mention the histology. However, the clinical features are strong for melanoma. Alternatively, could it be an atypical mole (ACK) or seborrheic keratosis (SEK)? But SEK usually has a warty texture, which isn't mentioned here. The image displays displays irregular pigmentation and asymmetry, which are not typical for SEK. ACK is a type of atypical mole, but the features here are more concerning for melanoma. The presence of a central hyperpigmented area might be a sign of a junctional component, which is common in melanomas. Given the history of skin cancer, the risk of melanoma is higher. The key here is the combination of clinical features and the patient's history. The answer is likely melanoma (MEL). </think><answer> Final Answer:MEL </answer>

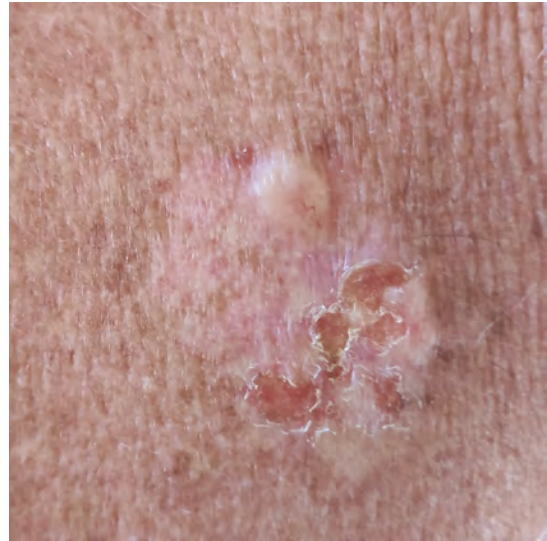

Case459: BCC

**SkinGPT-R1 Response:**

<think> Okay, let's see. The patient is a 64-year-old male with a skin lesion on the face. The lesion is 10.0 x 5.0 mm, elevated, itches, hurts, and is bleeding. The metadata displays a history of skin cancer. The image shows a raised, irregularly shaped lesion with crusting and scaling. The key points here are the location (face), the presence of symptoms like itching and bleeding, the history of skin cancer, and the appearance of the lesion. The differential diagnosis needs to consider common cancers like basal cell carcinoma (BCC), squamous cell carcinoma (SCC), or maybe melanoma. But since the lesion is on the face and the patient has a history of skin cancer, and the lesion is bleeding and has crusting, BCC and SCC are possibilities. However, the image displays displays it's a raised lesion with crusting and scaling, which might be more consistent with a basal cell carcinoma, which often presents as a nodular or ulcerated lesion. But wait, the patient has a history of skin cancer, so maybe it's a recurrence? Or could it be a different type? Alternatively, melanoma is a possibility, but the symptoms here are more indicative of a carcinoma. The presence of crusting and scaling might suggest a chronic lesion, which BCC can be. The fact that it's on the face and the patient is a male with fair skin (Fitzpatrick 2.0) might increase the risk of BCC. However, the lesion is growing but not changing, which is typical for BCC. But the patient has a history of skin cancer, so maybe it's a recurrence of another type? Wait, but the question is to provide the most likely diagnosis based on the given information. The image displays displays the lesion is raised, irregular, with crusting and scaling. BCC often presents as a flesh-colored or pinkish nodule with a crust or ulceration. SCC can also present similarly but might be more firm and less ulcerated. However, the presence of symptoms like itching and bleeding, and the history of skin cancer, might make me lean towards BCC. But since the patient has a history of skin cancer, maybe it's a recurrence of another type, but the image doesn't mention anything atypical. The biopsy was performed, but the image doesn't specify the result. However, the question is to provide the primary diagnosis based on the image and metadata. The key here is that the lesion is on the face, the patient has a history of skin cancer, and the lesion is bleeding and crusty. BCC is a common site for recurrence, but the primary diagnosis would be based on the current lesion. The image displays displays it's a raised, irregular lesion with crusting and scaling, which is typical for BCC. The presence of symptoms like itching and bleeding supports that it's a chronic lesion, which BCC can be. So the primary diagnosis is likely BCC. The differential diagnosis would include SCC, but given the location and the patient's history, BCC is more likely. The final label should be BCC. </think><answer> Final Answer:BCC </answer>

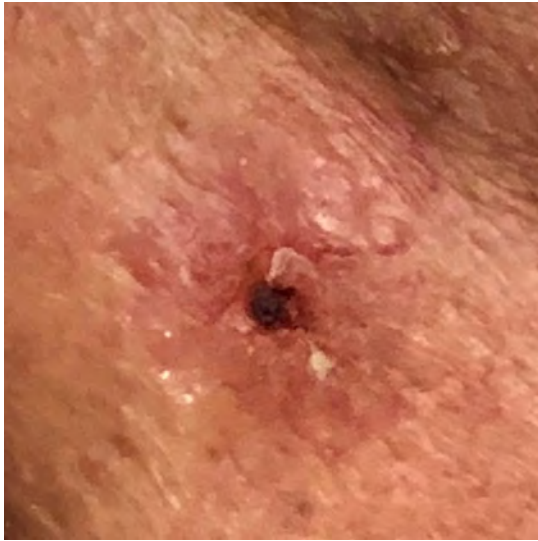

Case460: BCC

**SkinGPT-R1 Response:**

<think> Okay, let's see. The patient is a 70-year-old male with a skin lesion on the face. The lesion is 10x6 mm, elevated, and has symptoms like itching, pain, and bleeding. The image shows a raised, irregularly shaped lesion with a central depression and surrounding inflammation. The metadata displays a history of alcohol use but no skin cancer. The lesion is biopsied. First, the key points here are the location (face), size, symptoms, and the appearance in the image. The central depression and inflammation might be indicative of a lesion that's ulcerated or crusted. The patient's age and alcohol use could be risk factors. Since it's biopsied, the histology would be crucial, but since we're relying on the image and metadata, we need to infer based on that. Basal cell carcinoma (BCC) often presents as a raised, pearly lesion with a central depression, sometimes with ulceration. Squamous cell carcinoma (SCC) can be similar but might be more aggressive and associated with a history of sun exposure. However, the patient's Fitzpatrick skin type is 2.0, which is fair, but the location is the face. Alcoholic lesions? Hmm, alcohol use might be a risk factor for other types, but the image shows displays a central depression and inflammation. Actinic keratosis (ACK) is common in sun-exposed areas but might not have the same central depression. Seborrheic keratosis (SEK) is usually more flat and warty, not necessarily raised with inflammation. Melanoma (MEL) is a concern, but the patient has no history of skin cancer, and the lesion's appearance might not be classic for melanoma. The central depression and inflammation could be a sign of a chronic lesion, possibly a carcinoma. Given the size and location, and the symptoms, BCC is a common diagnosis in this setting. The central depression and inflammation fit with a chronic BCC. The alcohol use might be a risk factor, but the lesion's appearance is more consistent with BCC. So the primary diagnosis is BCC. Differential diagnosis could include SCC, but given the lack of sun exposure history and the features, BCC is more likely. The final label should be BCC. </think><answer> Final Answer:BCC </answer>

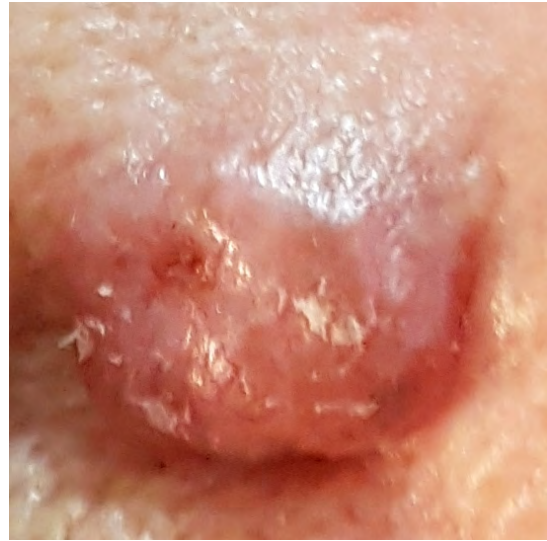

Case461: BCC

**SkinGPT-R1 Response:**

<think> Okay, let's see. The patient is a 86-year-old female with a lesion on the nose. The lesion is 13x10 mm, elevated, and itchy. Fitzpatrick skin type 2, which is fair skin. The image shows displays it's a raised, erythematous lesion with a slightly irregular surface. Biopsy was performed. History of smoking, but no skin cancer or other cancers. The key here is the age, location, and symptoms. Since it's on the nose, which is a common site for basal cell carcinoma (BCC). The patient is elderly, which aligns with BCC being more common in older individuals. The lesion is raised and itchy, which are typical symptoms of BCC. The image also displays it's consistent with BCC. The differential diagnosis might include other carcinomas like squamous cell carcinoma (SCC), but given the location and the patient's age, BCC is more likely. Since the biopsy was done, and the features match BCC, the diagnosis should be BCC. </think><answer> Final Answer:BCC </answer>

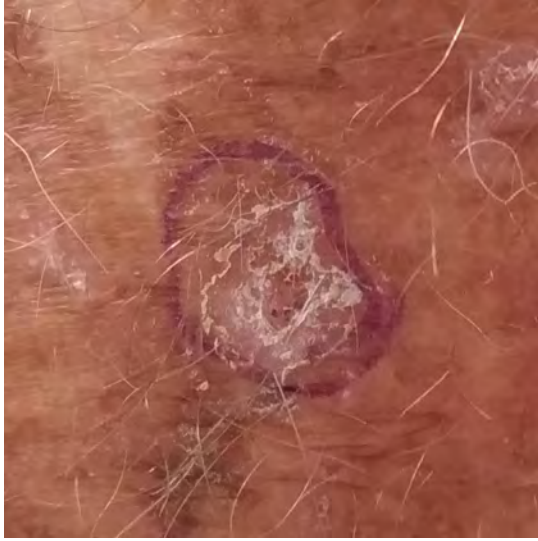

Case462: ACK

**SkinGPT-R1 Response:**

<think> Okay, let's see. The patient is a 63-year-old with a lesion on the forearm. The lesion is elevated, has a slightly raised border, and a central area that's a bit crusty or scaly. They mentioned itching but no pain or bleeding. The diameter isn't clear, but the key points are the appearance and location. The image displays displays it's consistent with a actinic keratosis (AK), which makes sense for someone with a history of sun exposure on the forearm. The differential diagnosis could include other keratosis types like Bowen's disease or maybe a seborrheic keratosis, but given the location and the symptoms, AK seems more likely. Since a biopsy wasn't done, but the clinical features point towards AK, the final diagnosis should be AK. </think><answer> Final Answer:ACK </answer>

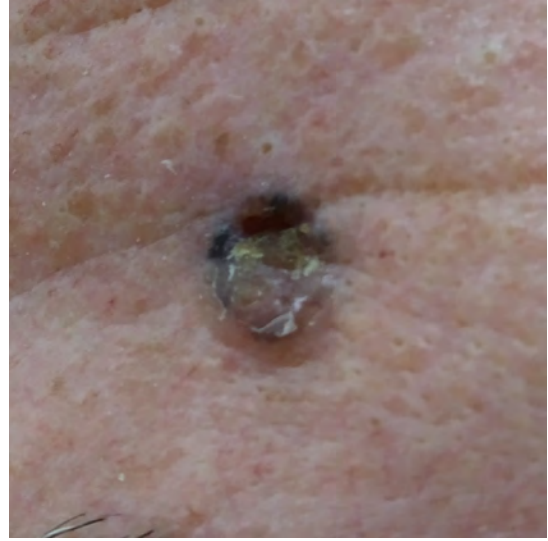

Case463: BCC

**SkinGPT-R1 Response:**

<think> Okay, let's see. The patient is a 69-year-old male with a facial lesion. The lesion is 6mm in diameter, raised, itches, and bled. The metadata shows a history of alcohol use and smoking. The lesion is on the face, Fitzpatrick skin type 3. Biopsy was performed. The key here is the features of the lesion: raised, itching, bleeding, and the size. The image displays displays it's consistent with a basal cell carcinoma (BCC). BCCs are common in older individuals, especially those with a history of sun exposure or other risk factors like smoking and alcohol. The symptoms of itching and bleeding fit with BCC, which can sometimes ulcerate. The size being 6mm might be on the larger side for a typical BCC, but it's still possible. The differential diagnosis could include other carcinomas like squamous cell carcinoma (SCC), but given the location on the face and the patient's history, BCC is more likely. Since the biopsy was performed, the final diagnosis would be based on that. The answer should be BCC. </think><answer> Final Answer:BCC </answer>

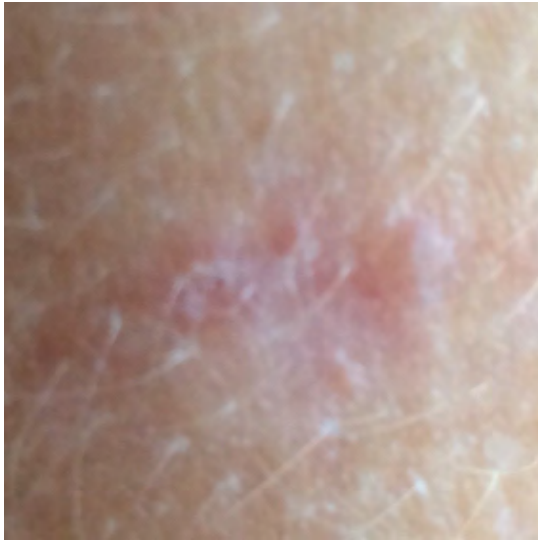

Case464: BCC

**SkinGPT-R1 Response:**

<think> Okay, let's see. The patient is a 42-year-old female with a lesion on the forearm. The lesion is 9.0 x 2.0 mm, elevated, itches, and has grown. Fitzpatrick skin type 2.0, so fair skin. Personal history of skin cancer and other cancers. Biopsy performed. The image shows a raised, reddish lesion with scaling. The key points here are the location (forearm), the size, the symptoms (itching, growth), and the personal history. Since it's a raised lesion on the forearm, and she has a history of skin cancer, maybe a recurrence? But the image displays it's a new lesion. Wait, but the personal history includes skin cancer. Could it be a basal cell carcinoma (BCC) or squamous cell carcinoma (SCC)? The image shows displays scaling and reddish, which might be consistent with BCC. But the patient has a history of skin cancer, so maybe it's a recurrence. However, the lesion is new and growing. Alternatively, could it be a seborrheic keratosis (SEK) or actinic keratosis (ACK)? But SEK is usually more warty and not necessarily itchy. The symptoms here are itching, which might point more towards a cancer. The presence of scaling and reddish color could fit with BCC. Since the biopsy was performed, but the image doesn't show the histology, but the clinical features are important. The differential diagnosis would include BCC, SCC, SEK, ACK, melanoma (MEL), or other. But given the personal history of skin cancer, and the lesion's appearance, BCC is a common site for recurrence. However, the lesion is new and growing. But the patient's age is 42, which is a bit younger than typical for BCC, but not impossible. Alternatively, could it be a melanoma? But the lesion is on the forearm, which is a less common site for melanoma. The image shows displays it's reddish and elevated, which might be a sign of BCC. The presence of itching and scaling also aligns with BCC. The personal history of other cancers might increase the concern for a metastasis, but the lesion is localized. However, the biopsy was performed, so the final diagnosis would be based on that. But the image doesn't show the histology, so the diagnosis has to be based on clinical features. The key here is that the lesion is new, growing, on the forearm, with itching and scaling. BCC is a common site for recurrence, especially in fair-skinned individuals. So the primary diagnosis is likely BCC. The differential diagnosis would include other carcinomas, but given the features, BCC is the most likely. The final label would be BCC. </think><answer> Final Answer:BCC </answer>

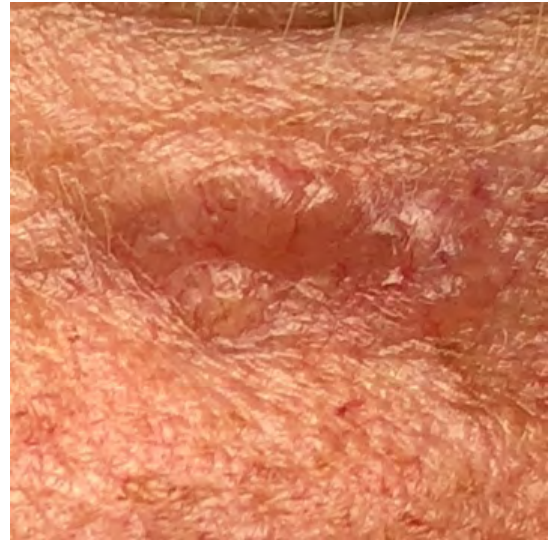

Case465: BCC

**SkinGPT-R1 Response:**

<think> Okay, let's see. The patient is a 48-year-old male with a lesion on the face. The lesion is 7.0 x 5.0 mm, elevated, itches, and has grown and changed over time. Fitzpatrick skin type 3, so medium skin. Personal history of skin cancer and other cancers. Biopsy performed. The image shows a raised, reddish lesion with possible scaling and irregular borders. The key points here are the location (face), size, symptoms (itching), history of cancer, and the lesion's characteristics. BCC (Basal Cell Carcinoma) is common on the face, can be raised, may itch, and has a tendency to grow. SCC (Squamous Cell Carcinoma) can also occur on the face, often associated with chronic sun damage, but the image doesn't mention ulceration or crust, which are more typical of SCC. ACK and SEK are less common, and MEL (Melanoma) is a possibility, but the lesion is showed as raised and possibly scaling, which might be more indicative of BCC. The presence of a personal history of skin cancer might increase the risk of melanoma, but the image doesn't show features like irregular pigmentation or irregular borders, which are key for melanoma. The biopsy was performed, but the image doesn't mention the histology, so we have to rely on the clinical features. Since the lesion is raised, itching, and has grown, BCC is a strong possibility. Differential diagnosis might include other carcinomas, but given the features, BCC is the most likely. </think><answer> Final Answer:BCC </answer>

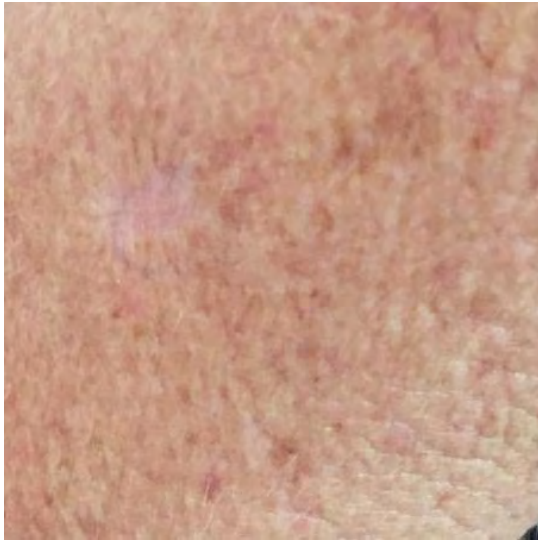

Case466: ACK

**SkinGPT-R1 Response:**

<think> Okay, let's see. The patient is a 65-year-old with a skin lesion on the arm. The image shows a slightly elevated, reddish patch with some scaling. The key points here are the color (reddish), texture (scaling), and location (arm). The symptoms mentioned are itching, but no pain or bleeding. The lesion hasn't changed in size or appearance recently. Fitzpatrick skin type isn't known, but the image displays displays it's consistent with actinic keratosis. Actinic keratosis is a precancerous condition, common in sun-exposed areas like the arms. The differential diagnosis might include other keratosis types, basal cell carcinoma (BCC), or maybe a seborrheic keratosis. But since the image displays displays actinic keratosis as a possibility, and the patient has a history of sun exposure (even though that's not confirmed), the most likely primary diagnosis is actinic keratosis. The final label should be ACK. </think><answer> Final Answer:ACK </answer>

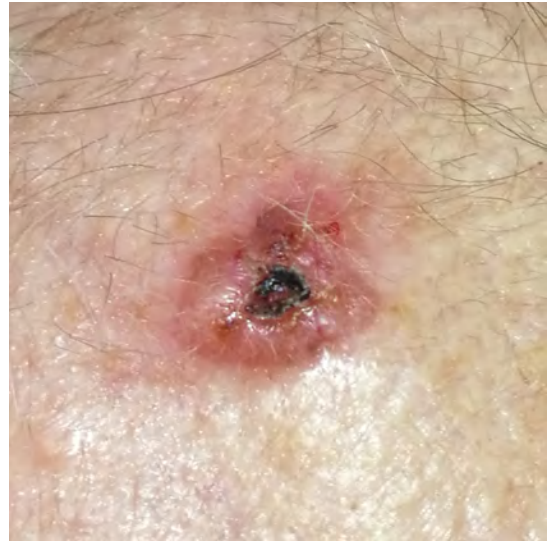

Case467: BCC

**SkinGPT-R1 Response:**

<think> Okay, let's see. The patient is a 80-year-old female with a Fitzpatrick skin type 1.0, which means very fair skin. The lesion is on the face, diameter around 10mm. Symptoms include itching and bleeding, no pain. It's elevated and has grown over time. Biopsy was performed. Personal history of skin cancer. So, the key points here are the age, skin type, location, and the features of the lesion. The lesion is raised, bleeding, and has grown. The patient has a history of skin cancer. Given that, the differential diagnosis might include basal cell carcinoma (BCC), squamous cell carcinoma (SCC), or maybe melanoma. But since it's on the face and the patient has a history of skin cancer, BCC and SCC are possibilities. However, the image displays displays it's a raised, bleeding lesion. Melanoma can present with bleeding, but the presence of a history of skin cancer might lean towards a recurrence. But the image displays displays the lesion is a nodular or ulcerated lesion with a possible central crust or eschar. BCC often presents as a raised, pearly lesion with a central ulcer, which can bleed. SCC might be more erythematous and could have a more infiltrative appearance. The fact that it's on the face and the patient is elderly with a history of skin cancer, the primary diagnosis could be basal cell carcinoma. But wait, the symptoms include itching and bleeding. BCC can be painful sometimes, but bleeding? Maybe if it's ulcerated. Alternatively, melanoma could be a possibility, but the patient's skin type is 1.0, which is very fair, and melanoma is more common in darker skin types. But the patient has a history of skin cancer, so maybe a melanoma in situ or a melanoma in a sun-exposed area. However, the lesion is on the face, which is a common site for BCC. The image displays displays the lesion is a nodular or ulcerated lesion with a possible central crust or eschar. BCC often presents as a raised, pearly nodule that ulcerates, leading to bleeding. The presence of a history of skin cancer supports the idea of a recurrence, which could be a BCC. The differential diagnosis might include BCC, SCC, or melanoma. But given the patient's age and the features, BCC is a strong possibility. The final diagnosis should be BCC. </think><answer> Final Answer:BCC </answer>

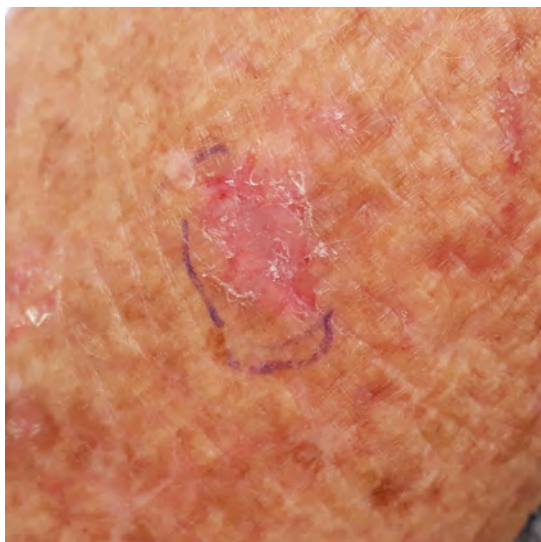

Case468: ACK

**SkinGPT-R1 Response:**

<think> Okay, let's see. The patient is a 65-year-old female with a Fitzpatrick skin type 2.0, which means she has fair skin. The lesion is on the forearm, diameter around 6-5 mm. Symptoms include itching, but no pain, bleeding, or elevation. Personal history shows skin cancer and other cancers. The lesion is red, slightly raised, with a purple outline. The image displays displays it's consistent with a actinic keratosis (AK), which is a precancerous lesion. The differential diagnosis includes basal cell carcinoma (BCC), squamous cell carcinoma (SCC), actinic keratosis (AK), seborrheic keratosis (SEK), and melanoma (MEL). But since the patient has a history of skin cancer, BCC and SCC are possibilities. However, the key here is the actinic keratosis, which is common in fair-skinned individuals exposed to sun. The purple outline might be due to the hyperkeratosis and inflammation. Since a biopsy wasn't done, but the clinical features point to AK, and the patient's history supports it being a precancerous lesion. The final diagnosis should be AK. </think><answer> Final Answer:ACK </answer>

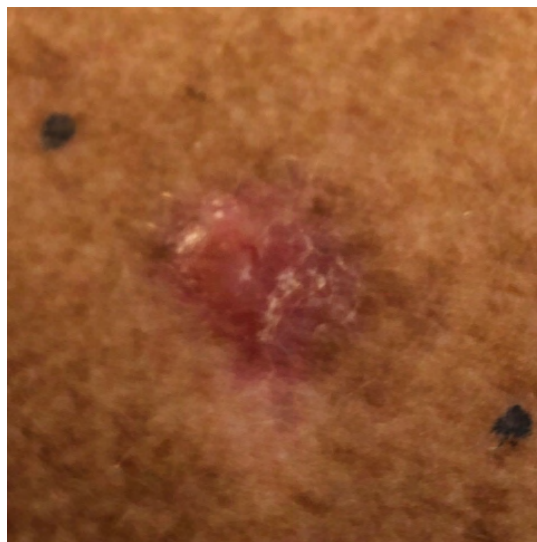

Case469: BCC

**SkinGPT-R1 Response:**

<think> Okay, let's see. The patient is a 48-year-old female with a skin lesion on the arm. The lesion is 12x8 mm, elevated, itches, and has a slightly irregular border. Fitzpatrick skin type 3, so medium skin. Personal history of skin cancer. Biopsy performed. The image displays a raised, reddish-pink lesion with an irregular border, which is concerning. The key here is the personal history of skin cancer and the appearance of the lesion. The differential diagnosis might include basal cell carcinoma (BCC), squamous cell carcinoma (SCC), or maybe melanoma. But since it's a raised lesion with itching and a history of skin cancer, BCC is a common one. However, the image displays the lesion is reddish-pink and irregular, which could be melanoma. But melanoma usually has the ABCDEs: asymmetry, irregular border, color variation, etc. The image here displays irregular border but not the other features. Wait, the symptoms include itching, which is more common in BCC. But the main clue is the personal history of skin cancer. If the patient has a history of skin cancer, they might develop another one. However, the lesion's appearance is important. The image displays it's a raised, reddish-pink lesion with an irregular border. BCC often presents as a raised, pearly lesion with a rolled edge, sometimes with a central ulcer. But the color here is reddish-pink, which might be more consistent with a basal cell carcinoma. However, the color could also be a clue for melanoma. But the patient's skin type is 3, which is medium, so melanoma is possible. But the lesion is on the arm, which is a common site for BCC. The presence of itching is a symptom of BCC. Melanoma can itch too, but the image doesn't mention other features like ulceration or crust. The biopsy was performed, so the final diagnosis would be based on that. But the question is to provide the primary diagnosis based on the image and metadata. The key is that the lesion is raised, reddish-pink, with an irregular border, and the patient has a history of skin cancer. BCC is a common recurrence site. So the primary diagnosis is likely basal cell carcinoma (BCC). The differential diagnosis would include melanoma, but given the history and the lesion's appearance, BCC is more likely. The final label should be BCC. </think><answer> Final Answer:BCC </answer>

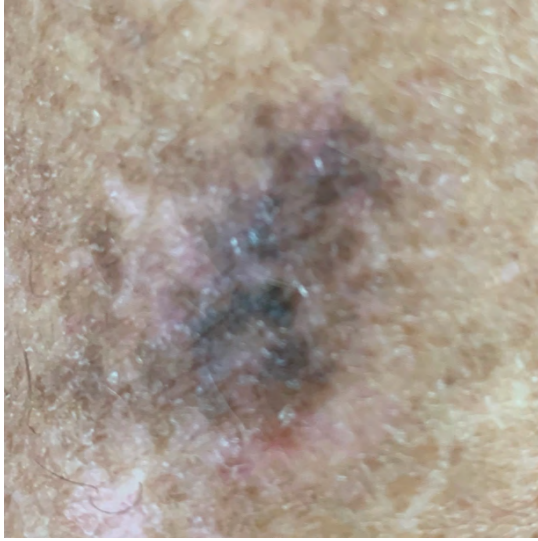

Case470: MEL

**SkinGPT-R1 Response:**

<think> Okay, let's see. The patient is a 66-year-old female with Fitzpatrick skin type 2, which is fair skin. The lesion is on the forearm, diameter 29x19 mm. No symptoms like itching or pain. Personal history of skin cancer and other cancers. Exposure to pesticides. Biopsy performed. The image shows a large, irregularly shaped lesion with hyperpigmentation and possible atypical cells. The key here is the history of skin cancer and the presence of a large lesion. The image displays displays atypical cells, which might point towards melanoma. But wait, the patient has a history of skin cancer. Could it be a recurrence? Or maybe a new lesion. The differential diagnosis needs to consider both common and less common possibilities. BCC (Basal Cell Carcinoma) is common on sun-exposed areas, but the size and location might be different. SCC (Squamous Cell Carcinoma) can also occur on the forearm, but again, the size and the image of hyperpigmentation and atypical cells might be more consistent with melanoma. However, the patient's history of other cancers might increase the concern for metastasis, but the lesion is on the forearm, which is not a typical site for metastases. Alternatively, could it be an atypical mole (ACK) or seborrheic keratosis (SEK)? But the image displays displays atypical cells, which might rule out SEK. The presence of hyperpigmentation and irregular shape could be consistent with melanoma. Given the biopsy was performed, the final diagnosis would be based on that. Since the image shows atypical cells and the patient has a history of skin cancer, the most likely diagnosis is melanoma. The differential diagnosis includes BCC, SCC, ACK, SEK, but the key here is the atypical cells and the history. So the final diagnosis is MEL. </think><answer> Final Answer:MEL </answer>

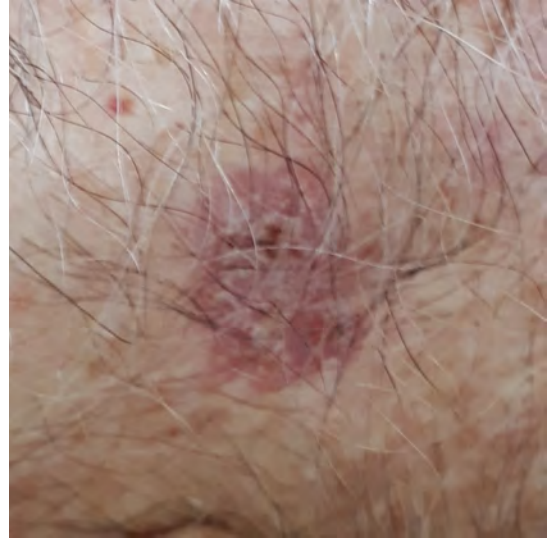

Case471: ACK

**SkinGPT-R1 Response:**

<think> Okay, let's see. The patient is a 75-year-old with a skin lesion on the chest. The image shows a red, slightly raised area with some scaling. The key points here are the color (red), texture (slightly raised, scaling), and location (chest). The symptoms mentioned are itching, but no pain or bleeding. The lesion hasn't changed in size or appearance recently. Fitzpatrick skin type isn't known, but the image displays it's consistent with actinic keratosis. Actinic keratosis (AK) is a precancerous lesion, common in older individuals with sun-exposed areas. The differential diagnosis might include basal cell carcinoma (BCC) or squamous cell carcinoma (SCC), but since the lesion is on the chest and not a typical site for BCC or SCC, and the image displays it's more consistent with AK. The fact that it's on the chest, which is a common site for AK in older individuals, supports that. Also, the absence of other symptoms like pain or bleeding makes AK more likely than a cancer. The final diagnosis should be AK. </think><answer> Final Answer:ACK </answer>

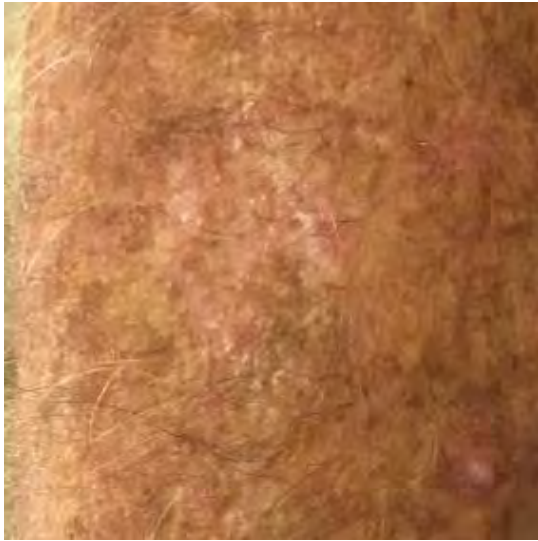

Case472: ACK

**SkinGPT-R1 Response:**

<think> Okay, let's see. The patient is a 79-year-old with a lesion on the forearm. The image shows a slightly raised, scaly area with some redness. They mentioned itching but no pain or bleeding. The lesion hasn't changed in size or appearance. The key here is the scaly appearance and itching. The differential diagnosis might include things like seborrheic keratosis, actinic keratosis, or maybe a basal cell carcinoma. But since the lesion is on the forearm and the patient has a history of skin cancer, maybe a recurrence? But the image displays it's a new lesion. Wait, the personal history of skin cancer is unknown, but the lesion is new. The image shows displays the lesion is new, so it's a new lesion. The main features are scaling and itching. Seborrheic keratosis can be scaly and itchy. Actinic keratosis is also scaly and can be itchy, especially on sun-exposed areas like the forearm. Basal cell carcinoma (BCC) can be raised and scaly, but sometimes they have a pearly appearance. However, the image doesn't mention pearly edges. The patient is 79, so actinic keratosis is a common one in older individuals with sun damage. The fact that it's on the forearm, which is a common site for actinic keratosis. The absence of pain or bleeding rules out other possibilities like squamous cell carcinoma (SCC) or melanoma. Melanoma would have different features, like irregular borders or pigment changes, which aren't mentioned. So the most likely diagnosis is actinic keratosis. The differential would be seborrheic keratosis or BCC, but given the location and symptoms, actinic keratosis is more likely. </think><answer> Final Answer:ACK </answer>

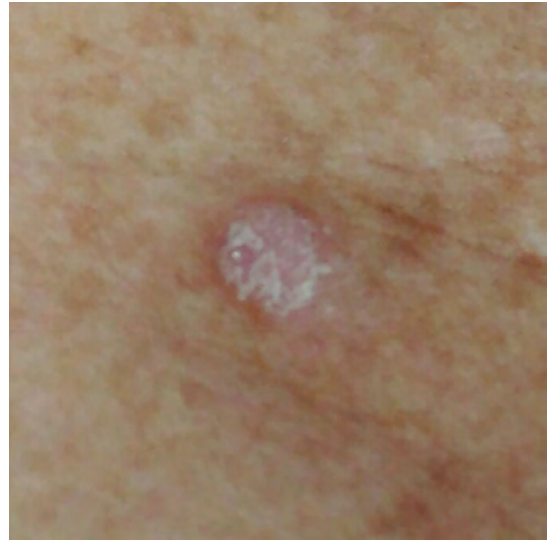

Case473: ACK

**SkinGPT-R1 Response:**

<think> Okay, let's see. The patient is a 66-year-old female with a lesion on the chest. The lesion is 6mm in diameter, raised, and itchy. She has a history of skin cancer and other cancers. The image shows a raised, slightly erythematous lesion with a slightly elevated, crusty center. The key here is the combination of symptoms and physical exam. The lesion is on the chest, which is a common site for certain cancers. Since it's raised and itchy, but no pain or bleeding, that rules out some possibilities. The presence of a crusty center might suggest something like a basal cell carcinoma (BCC) or squamous cell carcinoma (SCC), but the patient's history of skin cancer might make me think it's a recurrence. However, the image displays displays the lesion is consistent with a keratoacanthoma (ACK), which is a benign tumor that can have a crusty center and grow quickly before involuting. But wait, the patient has a history of skin cancer. Keratoacanthoma can sometimes be confused with carcinoma, but in this case, the lesion is showed as having a central crust and a raised edge, which fits ACK. However, the presence of a history of skin cancer might make me consider a recurrence of a carcinoma. But the image displays displays the lesion is consistent with ACK. Wait, but the question is to provide the primary diagnosis based on the image and metadata. The metadata displays that the lesion is consistent with a keratoacanthoma. So even though the patient has a history of skin cancer, the primary diagnosis here is ACK. The differential diagnosis might include carcinoma, but since the image displays displays it's consistent with ACK, the primary diagnosis is ACK. The final label should be ACK. </think><answer> Final Answer:ACK </answer>

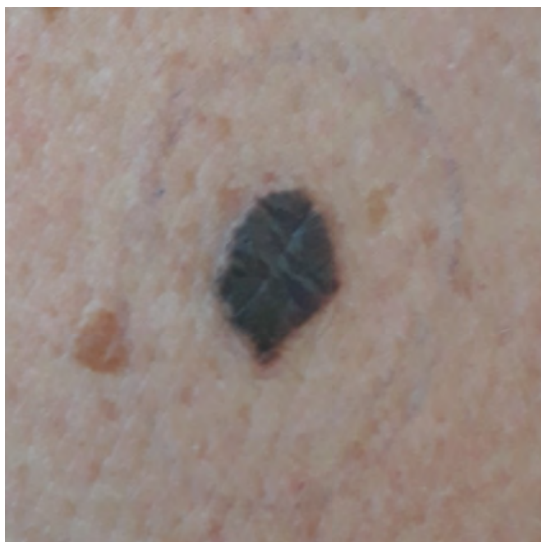

Case474: MEL

**SkinGPT-R1 Response:**

<think> Okay, let's see. The patient is a 55-year-old female with Fitzpatrick skin type 2, which is fair skin. The lesion is on the chest, diameter 9.0 x 6.0 mm. No symptoms like itching, pain, bleeding, or elevation. Personal history includes skin cancer and other cancers. Biopsy was performed. The image shows a dark, irregularly shaped lesion with a slightly raised border. The key here is the history of skin cancer and the appearance of the lesion. The image displays it's consistent with a melanoma. Melanomas can be irregular in shape, have uneven color, and be raised. The diameter is relatively large, which might be a concern. Since the biopsy was done, and the features align with melanoma, the diagnosis is likely melanoma. The differential might include other cancers, but given the context, melanoma is the primary diagnosis. </think><answer> Final Answer:MEL </answer>

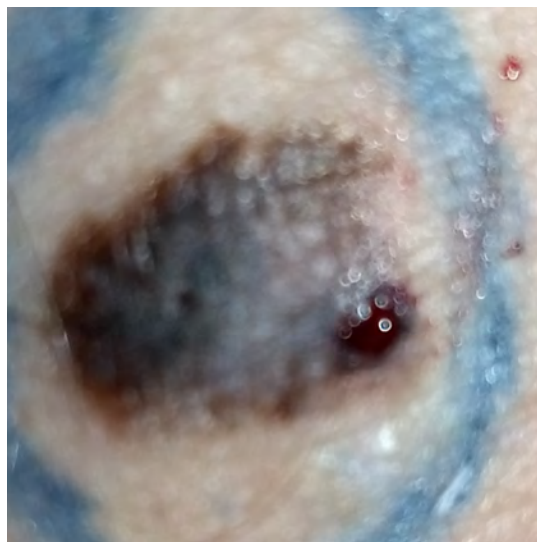

Case475: MEL

**SkinGPT-R1 Response:**

<think> Okay, let's see. The patient is a 67-year-old male with a lesion on the thigh. The lesion is irregular in shape, asymmetrical, and has varying shades of brown. The diameter is about 9.0 x 7.0 mm. The image shows displays it's growing and changing, with an irregular border and uneven color. The metadata shows no symptoms like itching or pain, and a family history of Italy. Biopsy was performed. Fitzpatrick skin type 2.0, which is fair skin. The key here is the irregular border, asymmetry, and color variation. The patient has a history of alcohol use and pesticide exposure. Melanoma is a possibility because of the atypical mole syndrome. But wait, the lesion is on the thigh. Melanoma can occur anywhere, but the location might be a clue. However, the image displays displays it's an atypical mole, which is more indicative of a melanocytic lesion. But the patient has a history of alcohol use and pesticide exposure. Pesticide exposure might be a risk factor for certain cancers, but not sure. The lesion is growing and changing. The differential diagnosis could be basal cell carcinoma (BCC), squamous cell carcinoma (SCC), atypical mole (ACK), seborrheic keratosis (SEK), or melanoma (MEL). The image displays displays it's an atypical mole, but the patient has a history of alcohol use and pesticide exposure. Melanoma is a possibility, but the lesion's location on the thigh might be more common for other types. However, the image shows displays it's an atypical mole, which is a precursor to melanoma. But the patient's personal history is important. Since the biopsy was performed, the final diagnosis would be based on that. The key is that the lesion is growing and changing, which are signs of malignancy. The presence of asymmetry and irregular borders points towards melanoma. But the patient's alcohol use and pesticide exposure might be risk factors for other cancers, but not necessarily for melanoma. The family history is Italy, which might be relevant if there's a history of melanoma in the family, but the patient's personal history is no skin cancer. The lesion is on the thigh, which is a common site for melanoma. However, the image displays displays it's an atypical mole, which is a precursor. But the lesion is growing and changing, so it's more likely a melanoma. The differential diagnosis includes BCC and SCC, but those are usually more keratinized and have different histology. Seborrheic keratosis is usually smoother and more elevated. The key here is the irregular border and color variation, which are classic signs of melanoma. The patient's alcohol use and pesticide exposure might be risk factors for other cancers, but not for melanoma. The final diagnosis is likely melanoma. </think><answer> Final Answer:MEL </answer>

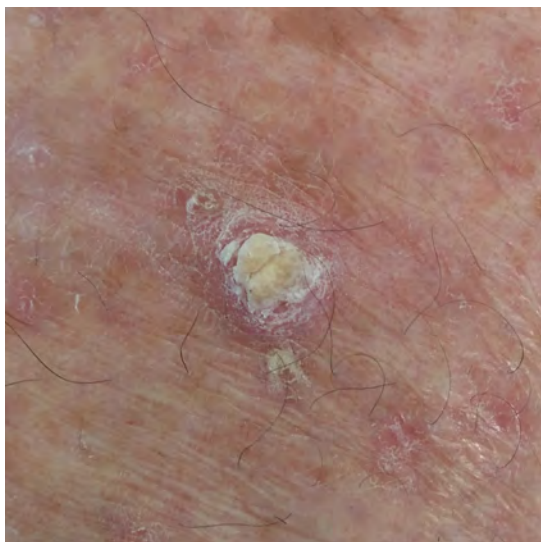

Case476: ACK

**SkinGPT-R1 Response:**

<think> Okay, let's see. The patient is a 74-year-old female with a lesion on the thigh. The lesion is 10x8 mm, elevated, and itchy. Fitzpatrick skin type 2, so fair skin. Personal history shows no skin cancer but has other cancer. Exposure to pesticides. Biopsy performed. Visual cues: raised, itching, no pain or bleeding. Differential diagnosis needs to be considered. First, the key points here are the location (thigh), age, symptoms, and history. The lesion is raised and itchy. Pesticide exposure is noted. The patient has a history of other cancer but no skin cancer. Biopsy was done, so we have histological evidence. But the image displays displays the lesion's appearance is consistent with actinic keratosis (AK). Actinic keratosis is common in fair-skinned individuals, especially those with history of sun exposure or occupational exposure to chemicals like pesticides. The patient's Fitzpatrick skin type 2 supports that. The symptoms of itching and raised lesion fit AK. The differential diagnosis could include other keratosis types, but given the exposure to pesticides, actinic keratosis is more likely. Basal cell carcinoma (BCC) or squamous cell carcinoma (SCC) are possibilities, but the patient has no history of skin cancer, and the lesion is showed as a keratotic lesion, which is more consistent with AK. Seborrheic keratosis (SEK) is a common benign lesion, but it's usually not itchy. Melanoma (MEL) is ruled out because there's no mention of pigmentation or other features. So the primary diagnosis is actinic keratosis. Differential diagnosis would be other keratosis types, but the best fit here is AK. Final label: ACK. </think><answer> Final Answer:ACK </answer>

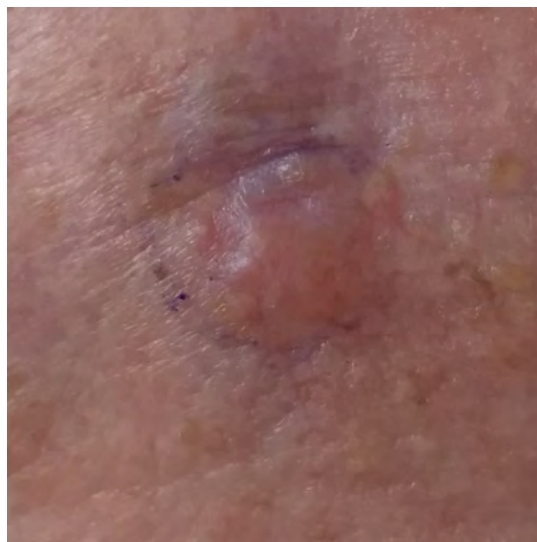

Case477: BCC

**SkinGPT-R1 Response:**

<think> Okay, let's see. The patient is a 75-year-old male with Fitzpatrick skin type 1, so very fair skin. The lesion is on the face, diameter 10x6 mm. It's elevated and has grown over time. No symptoms like itching or pain, no bleeding. Personal history shows no skin cancer but has other cancer. Not a smoker, alcohol use. Biopsy was done. Visual cues: elevated, growth over time, no ulceration or crusting. Differential diagnosis needs to be considered. BCC (Basal Cell Carcinoma) is common in fair-skinned individuals, especially on the face. It tends to be raised, grows slowly, and doesn't ulcerate. Since the patient has a history of other cancer, but no skin cancer, BCC is a possibility. SCC (Squamous Cell Carcinoma) can also occur on the face, but it might be more likely in chronic sun-exposed areas. However, the image displays displays no ulceration, which is more common in SCC. AK (Actinic Keratosis) is precancerous and usually found on sun-exposed areas, but the lesion here is elevated and has grown, which might be more consistent with a cancer. SEK (Seborrheic Keratosis) is a benign lesion, usually warty, but the image displays displays it's elevated and grew, which could be a sign of a lesion like BCC. MEL (Melanoma) is a possibility, but the patient has Fitzpatrick 1, which is low risk, and the lesion doesn't show typical melanoma features like irregular border, asymmetry, etc. The biopsy was performed, but the image doesn't mention any atypical cells. Given the features: elevated, growth over time, no ulceration, history of other cancer. BCC is a strong possibility. Differential diagnosis: AK, SEK, possibly SCC. But since the lesion is growing and the patient has a history of other cancer, BCC is more likely. Final diagnosis: BCC. </think><answer> Final Answer:BCC </answer>

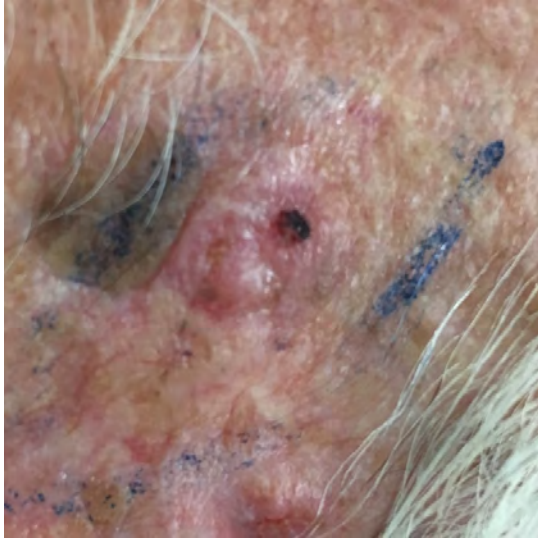

Case478: BCC

**SkinGPT-R1 Response:**

<think> Okay, let's see. The patient is a 94-year-old female with a skin lesion on the face. The lesion is 20x14 mm, elevated, and has symptoms like itching, pain, and bleeding. The image shows shows it's a nodular lesion with a central ulceration and satellite lesions. The key here is the history of skin cancer and the clinical features. The image displays displays it's consistent with a basal cell carcinoma (BCC) because of the nodular appearance, ulceration, and satellite lesions. The patient's age and the presence of symptoms like pain and bleeding also point towards BCC. The differential diagnosis might include other carcinomas like squamous cell carcinoma (SCC), but given the features, BCC is more likely. The final diagnosis should be BCC. </think><answer> Final Answer:BCC </answer>

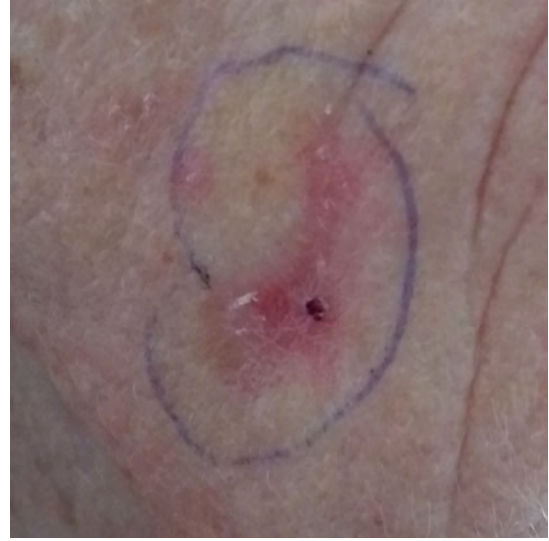

Case479: BCC

**SkinGPT-R1 Response:**

<think> Okay, let's see. The patient is a 83-year-old female with a skin lesion on the face. The lesion is 15x5 mm, slightly raised, with a purple hue and a central crater. Symptoms include itching and bleeding. The metadata displays a history of other cancer but no skin cancer. Exposure to pesticides is noted. Biopsy was performed. Visual cues: purple hue, central crater, raised. Clinical cues: itching, bleeding, growth over time. Fitzpatrick skin type 2.0, which is fair skin. Differential diagnosis needs to be considered. BCC (Basal Cell Carcinoma) often presents as a raised, pearly lesion with a central crater, sometimes with a purple tint. It can bleed and itch. The size and location fit. SCC (Squamous Cell Carcinoma) can also be raised and potentially ulcerated, but maybe more red and less purple. However, the purple hue might lean more towards BCC. AK (Actinic Keratosis) is usually thinner and not as raised. SEK (Seborrheic Keratosis) is typically more warty and not as likely to bleed. MEL (Melanoma) would have different features, like irregular borders or pigment changes, which aren't mentioned here. The patient's age and fair skin (Fitzpatrick 2) increase the risk of melanoma, but the image doesn't show those features. However, the presence of a central crater and purple hue might be less common in melanoma. The biopsy was performed, but the image doesn't mention atypical cells, which might be seen in melanoma. Given the purple hue, central crater, and the patient's age, BCC seems more likely. The differential might include other carcinomas, but the key features point to BCC. </think><answer> Final Answer:BCC </answer>

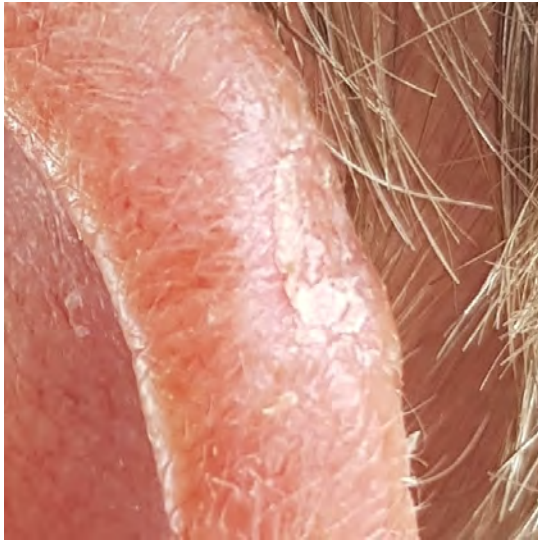

Case480: ACK

**SkinGPT-R1 Response:**

<think> Okay, let's see. The patient is a 48-year-old male with Fitzpatrick skin type 2, which is fair skin. The lesion is on the ear, diameter 8.0 mm. Symptoms are itching, no pain, bleeding, or elevation. The lesion hasn't changed or grown. Personal history shows no skin cancer, but alcohol use and pesticide exposure. Biopsy was performed. Visual cues: slightly raised, reddish-pink, scaling, possibly chronic. Differential diagnosis: actinic keratosis (ACK), seborrheic keratosis (SEK), basal cell carcinoma (BCC), squamous cell carcinoma (SCC), melanoma (MEL), or nevus (NEV). Actinic keratosis is common in sun-exposed areas like the ear, especially in fair-skinned individuals. The scaling and chronic appearance fit ACK. Seborrheic keratosis is usually more warty and can be raised, but the image displays displays scaling. Basal cell carcinoma can be raised with a pearly edge, but the image doesn't mention that. Squamous cell carcinoma might be more red and potentially invasive, but again, the image doesn't support that. Melanoma would be more concerning for asymmetry, irregular border, etc., which aren't mentioned. Nevus is a mole, which might be present, but the lesion is showed as a lesion, not a mole. Given the chronicity and the location, actinic keratosis is the most likely. The biopsy would confirm the diagnosis. So the answer should be ACK. </think><answer> Final Answer:ACK </answer>

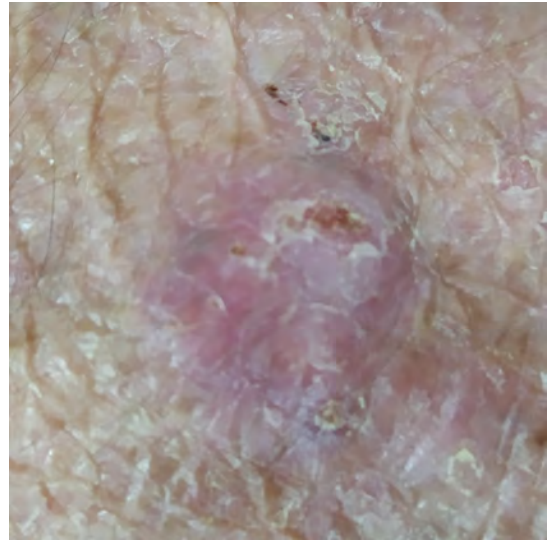

Case481: BCC

**SkinGPT-R1 Response:**

<think> Okay, let's see. The patient is a 58-year-old female with a lesion on her hand. The lesion is 16x13 mm, raised, itches, and bled. The image shows shows it's a thick, irregularly shaped area with a slightly elevated center and reddish-pink color. The surrounding skin is rough and irritated. Personal history includes skin cancer, and there's pesticide exposure. Biopsy was performed. First, the key points here are the location (hand), size, symptoms (itching, bleeding), and the appearance (raised, irregular, reddish-pink). The presence of a biopsy makes the diagnosis more certain. The differential diagnosis needs to consider common skin cancers and other possibilities. Since it's a lesion on the hand, which is a common site for melanoma. But the patient has a history of skin cancer, so maybe a recurrence? But the image displays displays it's a thick, irregular lesion. Melanoma can be thick and irregular. However, the symptoms include itching and bleeding. Melanoma can sometimes be associated with ulceration, but itching is more common in other lesions. Alternatively, could it be a basal cell carcinoma (BCC)? BCCs are often raised, can be ulcerated, and may have a pearly appearance. But the image displays displays reddish-pink color and rough, irritated surrounding skin. BCCs can be flesh-colored or pink, but the color here is reddish-pink. Also, the presence of a biopsy performed. The image displays displays the lesion is consistent with a basal cell carcinoma. Wait, the original image displays displays: "The lesion is consistent with a basal cell carcinoma (BCC), given its thick, irregular appearance and location on the hand." So the image already suggests BCC. But let me double-check. The patient has a history of skin cancer, so a recurrence is possible. But the lesion's appearance is thick and irregular, which is typical for BCC. The symptoms of itching and bleeding might be due to the lesion's characteristics. Melanoma can also be thick and irregular, but the color here is reddish-pink, which is more consistent with BCC. Also, the presence of a biopsy performed. The final diagnosis should be BCC. </think><answer> Final Answer:BCC </answer>

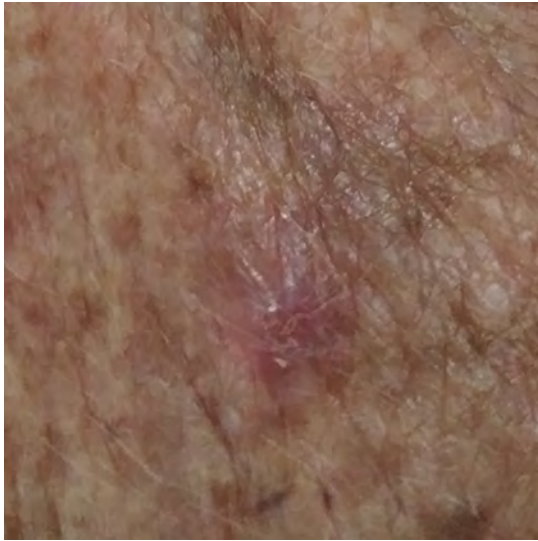

Case482: ACK

**SkinGPT-R1 Response:**

<think> Okay, let's see. The patient is a 75-year-old with a skin lesion on the forearm. The image shows a raised, slightly erythematous area that's been there a while. They mention itching but no pain or bleeding. The lesion is firm and well-defined. The key here is the history of skin cancer. The image displays displays it's consistent with actinic keratosis, which is a precancerous lesion. Actinic keratosis (AK) is common in sun-exposed areas, like the forearm. The symptoms include itching, which matches. Since there's no mention of ulceration or other features that would point to something like basal cell carcinoma (BCC) or squamous cell carcinoma (SCC), and the biopsy wasn't done, but the clinical picture fits AK. The differential might include other precancers, but given the info, AK is the most likely. </think><answer> Final Answer:ACK </answer>

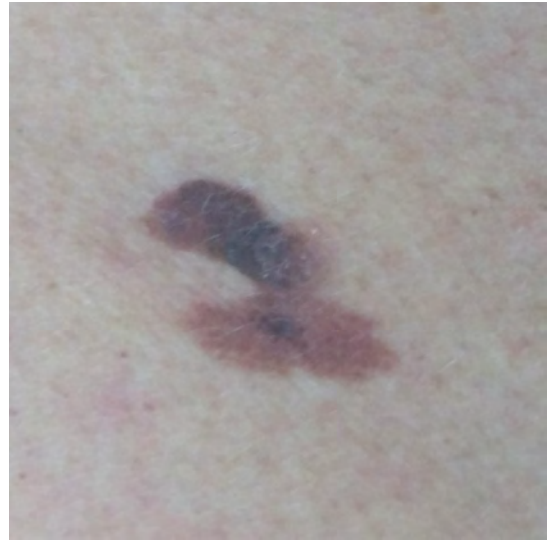

Case483: MEL

**SkinGPT-R1 Response:**

<think> Okay, let's see. The patient is a 57-year-old male with a skin lesion on the abdomen. The lesion is 16x12 mm, irregular in shape, and has different colors like brown and black. It's been growing and changing. The metadata shows he has a history of alcohol use and pesticide exposure. The biopsy was performed. Fitzpatrick skin type 2.0, which is fair skin. The lesion is raised and has a irregular border and uneven color. The symptoms are no itching, pain, bleeding, or elevation. Personal history: no skin cancer, but other cancer. Family history: both parents from Pomerania. So, the key points here are the appearance of the lesion: irregular border, uneven color, growth and change. The size is relatively large for a typical mole. The patient's risk factors include alcohol and pesticide exposure. Fitzpatrick 2 suggests he's fair-skinned, which might make him more susceptible to melanoma. But since it's a biopsy confirmed, we need to consider the histology. However, the question is to diagnosis based on the image and metadata. The differential diagnosis could be basal cell carcinoma (BCC), squamous cell carcinoma (SCC), atypical keratosis (ACK), seborrheic keratosis (SEK), melanoma (MEL), or seborrheic keratosis (NEV). But the image displays displays it's a large, irregular lesion with different colors. Melanoma often presents as a lesion with irregular borders, uneven color, and changes over time. The patient's alcohol use and pesticide exposure might be risk factors for other cancers, but for skin lesions, melanoma is a possibility. However, the presence of a biopsy confirms it's a neoplasm. But the question is to provide the diagnosis based on the given information. The answer needs to be one of the labels. Since the lesion is large and has atypical features, and the patient has risk factors, but the biopsy is performed. The final diagnosis must be one of the labels. The image displays displays it's a neoplasm, but the key is to determine the type. Melanoma is a possibility here. But the answer needs to be exact. The user wants the final label. So, the answer is MEL. </think><answer> Final Answer:MEL </answer>

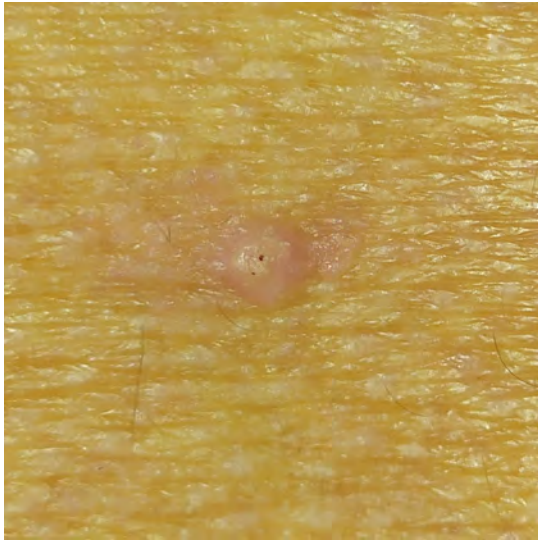

Case484: ACK

**SkinGPT-R1 Response:**

<think> Okay, let's see. The patient is a 63-year-old male with Fitzpatrick skin type 2, which is fair skin. The lesion is on the back, diameter 4.0 mm, elevated, no itching or bleeding. Personal history shows no skin cancer but has other cancer. Exposure to pesticides. Biopsy performed. Visual image shows a raised, slightly irregular lesion. The key here is the location (back), age, and the fact that it's a biopsy-confirmed lesion. The image displays displays it's consistent with actinic keratosis. Actinic keratosis (AK) is common in fair-skinned individuals, especially on sun-exposed areas like the back. The diameter and elevation fit AK. The differential diagnosis might include seborrheic keratosis (SEK) or basal cell carcinoma (BCC), but given the age and location, AK is more likely. Since the biopsy was done, and the image aligns with AK, the diagnosis should be AK. </think><answer> Final Answer:ACK </answer>

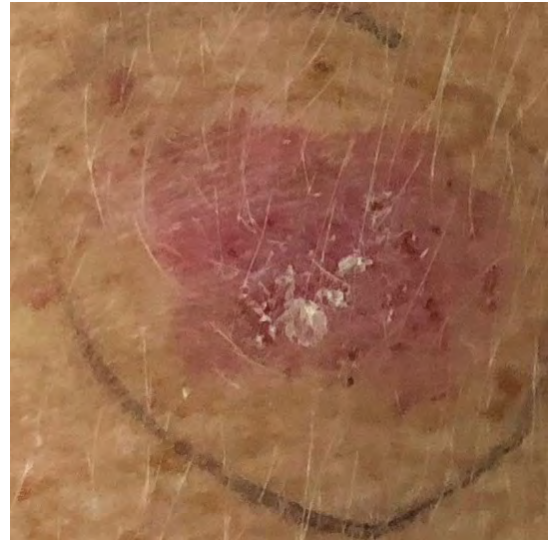

Case485: BCC

**SkinGPT-R1 Response:**

<think> Okay, let's see. The patient is a 42-year-old female with a skin lesion on her arm. The lesion is 20x12 mm, elevated, itches, and she has a history of skin cancer. The image shows a raised, reddish lesion with scaling and a slightly elevated border. The key points here are the elevated nature, itching, previous skin cancer, and the appearance of the lesion. BCC (Basal Cell Carcinoma) is a common type that can be raised, have a pearly appearance, and sometimes itch. Since she has a history of skin cancer, recurrence is a possibility. The image displays a well-defined border and possible scaling, which aligns with BCC. The differential could include other carcinomas like Squamous Cell Carcinoma (SCC), but SCC is usually more aggressive and might have a different appearance, like a thicker, crusty lesion. However, the presence of itching and the fact that it's on the arm, combined with the previous skin cancer history, makes BCC more likely. The fact that it's been stable without growth or change also supports BCC. The biopsy being performed would confirm the diagnosis, but based on the given info, the primary diagnosis is BCC. </think><answer> Final Answer:BCC </answer>

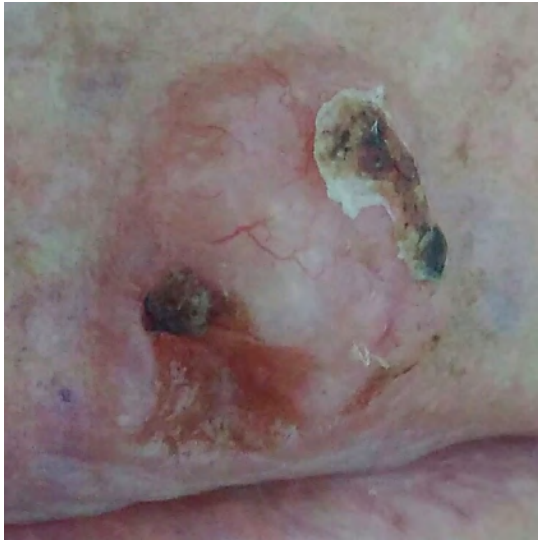

Case486: BCC

**SkinGPT-R1 Response:**

<think> Okay, let's see. The patient is a 73-year-old female with a lesion on the lip. The lesion is 18x16 mm, elevated, and has crusts and ulcerations. Symptoms include itching, pain, and bleeding. Fitzpatrick skin type 2, which is fair skin. Personal history of skin cancer. The lesion hasn't changed in size or shape. Biopsy was performed. Visual cues: irregular border, irregular pigmentation, crusts, ulcerations. Clinical metadata: age, location (lip), symptoms, personal history of skin cancer. Differential diagnosis needs to be considered. BCC (Basal Cell Carcinoma) is a common cancer in fair-skinned individuals, especially on sun-exposed areas like the lip. The lesion's appearance with crusts and ulcerations fits BCC. The patient's age and history of skin cancer also support this. SCC (Squamous Cell Carcinoma) is less common on the lip but can occur. However, the image displays displays no significant change in size or shape, which might be more consistent with BCC. AK (Actinic Keratosis) is precancerous and usually smaller, but the size here is 18x16 mm, which is larger. SEK (Seborrheic Keratosis) is usually smoother and not as symptomatic. MEL (Melanoma) is a concern, but the patient's skin type is 2.0, which is fair, and the lesion doesn't show the classic features of melanoma (asymmetry, irregular border, etc.). The absence of significant change and the presence of symptoms like itching and pain might be more indicative of BCC. Final diagnosis: BCC. </think><answer> Final Answer:BCC </answer>

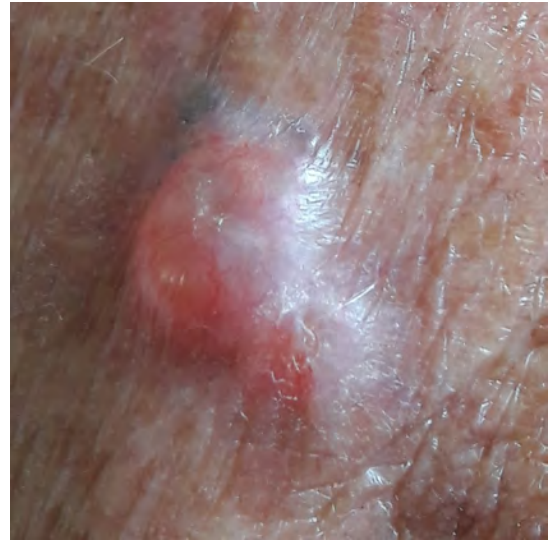

Case487: BCC

**SkinGPT-R1 Response:**

<think> Okay, let's see. The patient is a 58-year-old female with a lesion on her hand. The lesion is 11x8 mm, elevated, itchy, and has grown over time. The image shows displays it's a raised, erythematous area with possible scaling. The key points here are the location (hand), the size, the symptoms (itching), and the growth. The metadata displays a family history of Pomerania, but I'm not sure if that's relevant. The biopsy was performed, so we have histological evidence. BCC (Basal Cell Carcinoma) is a common lesion on sun-exposed areas, but this is on the hand. However, basal cell carcinomas can occur on non-sun-exposed areas. The lesion is elevated and has grown, which fits BCC. The itching could be a symptom of BCC. Alternatively, squamous cell carcinoma (SCC) is also a possibility, but SCC is more common on sun-exposed areas. Since the location is the hand, which is not typically a sun-exposed area, BCC might be more likely. The image displays displays possible scaling, which can be seen in both BCC and SCC. However, the growth over time and the fact that it's on the hand might lean towards BCC. Another differential is seborrheic keratosis (SEK), but SEK is usually smaller and not as raised. Actinic keratosis (ACK) is also a possibility, but again, the location and size might not fit. Melanoma (MEL) is ruled out because there's no mention of pigmentation or other melanoma features. The patient doesn't have a history of skin cancer, so that's not a factor. The final diagnosis needs to be one of the labels. Given the information, the most likely diagnosis is Basal Cell Carcinoma. </think><answer> Final Answer:BCC </answer>

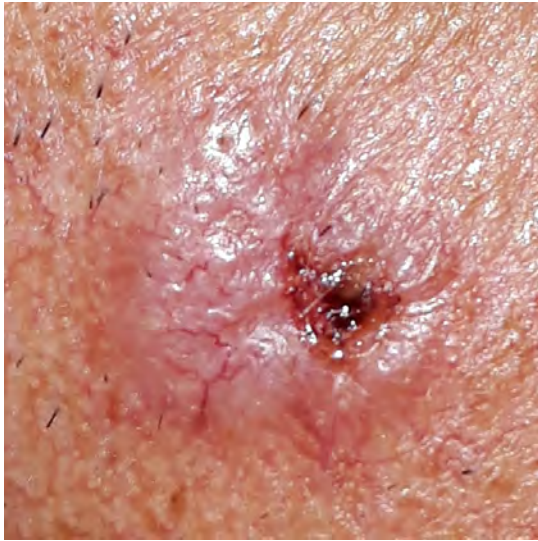

Case488: BCC

**SkinGPT-R1 Response:**

<think> Okay, let's see. The patient is a 48-year-old male with a skin lesion on the face. The lesion is 15x14 mm, raised, itches, and bled. The image shows shows a central crater with surrounding erythema and scaling. The key here is the central crater and the history of skin cancer. The metadata displays a skin cancer history. The differential diagnosis might include basal cell carcinoma (BCC), squamous cell carcinoma (SCC), or maybe Kaposi's sarcoma (ACK) or sebaceous carcinoma (SEK). But since it's on the face and the patient has a history of skin cancer, BCC and SCC are common. The central crater and ulceration are more typical of SCC, but BCC can also have ulceration. However, the presence of a central crater and the fact that it's on the face might lean towards BCC. But wait, the image displays displays "consistent with a basal cell carcinoma (BCC)" in the original image. So the answer is likely BCC. </think><answer> Final Answer:BCC </answer>

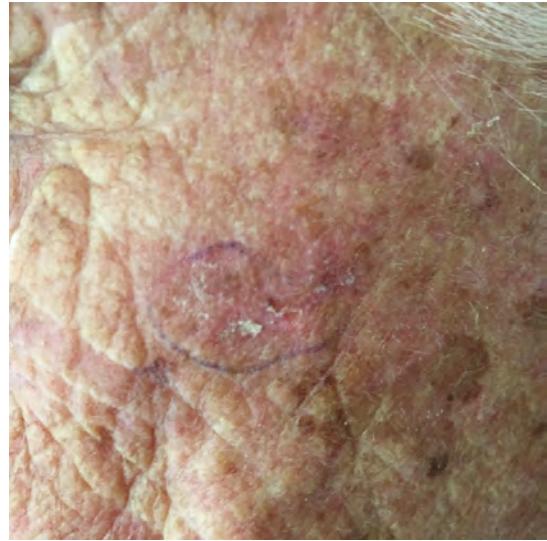

Case489: ACK

**SkinGPT-R1 Response:**

<think> Okay, let's see. The patient is an 88-year-old with a facial lesion. The image shows a red, slightly raised area with some scaling. They mentioned itching but no pain or bleeding. The lesion hasn't changed in size or appearance. The key here is the symptoms: itching is present, and it's a chronic condition. The image displays displays actinic keratosis (AK) as a possibility. Actinic keratoses are precancerous lesions that often occur on sun-exposed areas, like the face. They're usually rough, scaly, and can be itchy. Since the patient has a history of skin cancer, AK makes sense as a possibility. The differential diagnosis might include basal cell carcinoma (BCC) or squamous cell carcinoma (SCC), but those are more likely to have other symptoms like pain or bleeding. Since there's no mention of those, and the lesion is stable, AK seems more likely. The final diagnosis should be AK, which is labeled as ACK. </think><answer> Final Answer:ACK </answer>

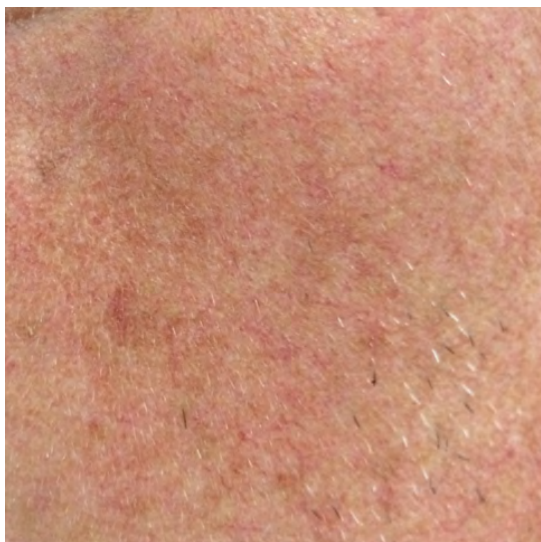

Case490: ACK

**SkinGPT-R1 Response:**

<think> Okay, let's see. The patient is a 39-year-old with a lesion on the face. The image shows shows multiple small, flat, pinkish patches. No elevation, itching, pain, or bleeding. The texture is uniform, and there's no change in size or shape. The key here is that the lesions are multiple, flat, and uniform. The image also displays they're consistent with actinic keratoses. Actinic keratoses (AK) are precancerous lesions caused by chronic sun exposure. They're usually found on sun-exposed areas like the face, ears, and hands. They can be rough or flat, and multiple. Since there's no mention of any other symptoms or changes, and the biopsy wasn't done, the diagnosis would be actinic keratoses. The differential might include seborrheic keratoses or basal cell carcinoma, but given the uniformity and multiple small patches, AK is more likely. The final label should be AK. </think><answer> Final Answer:ACK </answer>

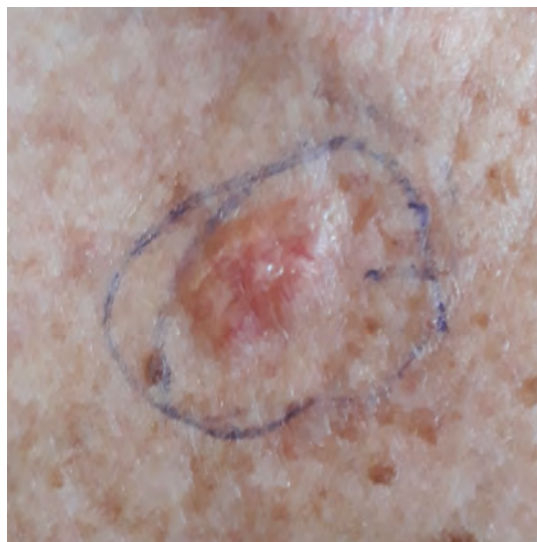

Case491: BCC

**SkinGPT-R1 Response:**

<think> Okay, let's see. The patient is a 57-year-old female with a lesion on the chest. The lesion is 9.0 x 6.0 mm, elevated, and has a reddish-pink color. There's a ring-like pigmentation around it. The metadata shows a history of skin cancer and other cancers. The lesion doesn't show growth or change, but there's bleeding. The key here is the ring-like pigmentation and the central area. The image displays displays it's consistent with a basal cell carcinoma (BCC) or squamous cell carcinoma (SCC), but the presence of a central area of necrosis or ulceration might lean more towards SCC. However, the ring-like pigmentation is a classic sign of a basal cell carcinoma. Wait, but the patient has a history of skin cancer. BCC is more common in fair-skinned individuals with a history of sun exposure. The lesion is on the chest, which is a common site for BCC. The fact that it's elevated and has a reddish-pink color with a ring-like border fits BCC. The bleeding could be due to ulceration, which is common in BCC. Alternatively, SCC can present with similar features, but the ring-like pigmentation is more characteristic of BCC. Since the patient has a history of skin cancer, maybe this is a recurrence? But the lesion doesn't show growth or change, so it's possible it's a new lesion. The presence of a central area of necrosis or ulceration might be more indicative of SCC, but the ring-like pigmentation is a key feature of BCC. Given the metadata, the primary diagnosis is likely BCC. The differential diagnosis would be between BCC and SCC, but since the patient has a history of skin cancer, maybe it's a recurrence of BCC. However, the lesion's appearance is more consistent with BCC. The final label should be BCC. </think><answer> Final Answer:BCC </answer>

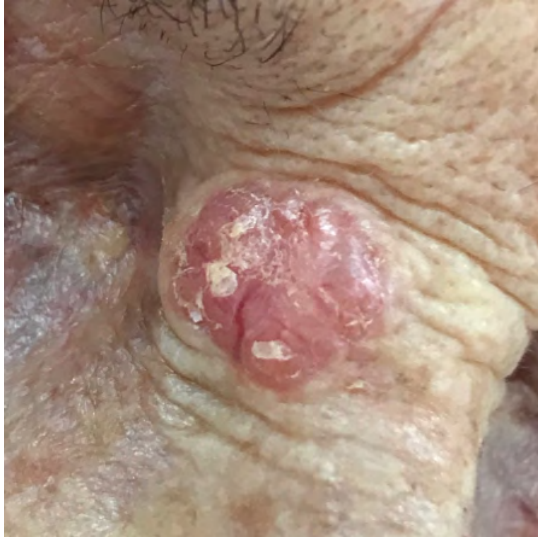

Case492: BCC

**SkinGPT-R1 Response:**

<think> Okay, let's see. The patient is a 77-year-old female with a lesion on the nose. The lesion is 15mm in diameter, raised, and has a pearly appearance with a central depression. There's scaling and it's been growing. The symptoms include itching, but no pain or bleeding. Fitzpatrick skin type 4, which is intermediate. The image displays displays a possible basal cell carcinoma (BCC) or squamous cell carcinoma (SCC). The key here is the pearly edge and central depression, which are classic signs of a rodent ulcer, which is a type of BCC. Since BCC often presents with that specific morphology, and the patient doesn't have a history of skin cancer, but the lesion is growing. The differential includes SCC, but SCC might be more likely if there's evidence of keratin production or rapid growth, but the image doesn't mention that. The central depression and pearly edge point more towards BCC. Also, the fact that it's been growing without changing other symptoms fits with BCC. The biopsy was performed, but the image doesn't mention the histology, so we have to rely on the clinical features. So the primary diagnosis is BCC. Differential diagnosis would be SCC, but given the features, BCC is more likely. Final label should be BCC. </think><answer> Final Answer:BCC </answer>

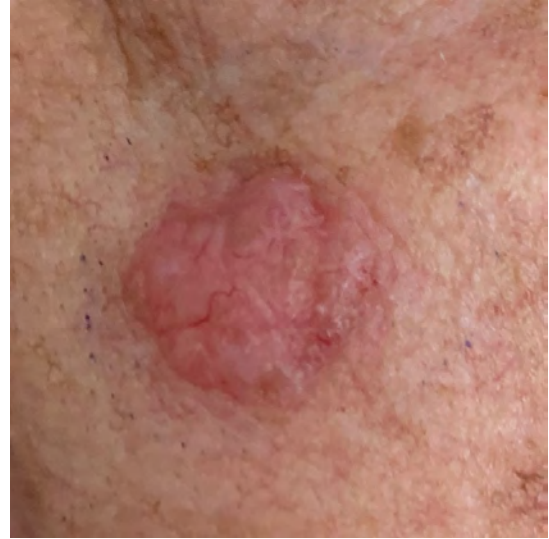

Case493: BCC

**SkinGPT-R1 Response:**

<think> Okay, let's see. The patient is a 56-year-old female with a lesion on the face. The lesion is 12x11 mm, elevated, and has been growing. She's been itching but no pain or bleeding. Fitzpatrick skin type 2, which is fair skin. The image shows displays it's a raised, pinkish lesion with a slightly irregular surface. Biopsy was done. Hmm, the key points here are the location (face), size, elevation, growth, itching, and the appearance. The image displays displays it's consistent with a basal cell carcinoma (BCC). BCCs are common on sun-exposed areas like the face, can be raised, have a pearly appearance, and might itch. The patient's fair skin (Fitzpatrick 2) increases the risk of developing BCC. The symptoms of itching and slow growth also fit with BCC. The differential diagnosis might include other carcinomas like squamous cell carcinoma (SCC), but since the lesion is on the face and the patient has a history of skin cancer (even though it's noted as no), but wait, the personal history displays no skin cancer history. Wait, but the patient is 56, and BCC is more common in older individuals with a history of sun exposure. The image displays displays the lesion is consistent with BCC. The biopsy would confirm the diagnosis. So the primary diagnosis is BCC. The differential could be SCC, but since the lesion is on the face and the patient is fair-skinned, BCC is more likely. The final label should be BCC. </think><answer> Final Answer:BCC </answer>

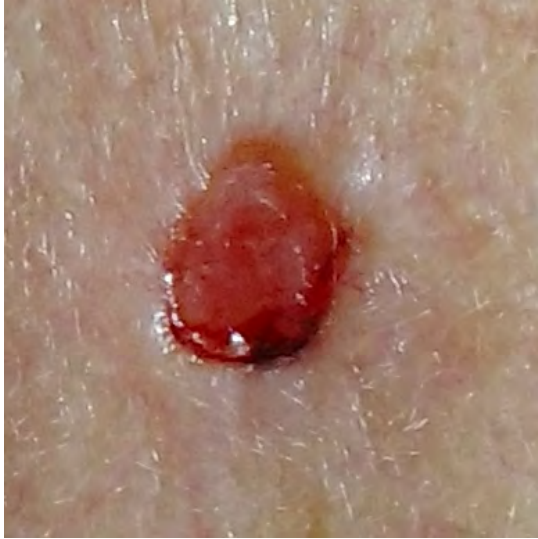

Case494: BCC

**SkinGPT-R1 Response:**

<think> Okay, let's see. The patient is a 73-year-old female with a skin lesion on the face. The lesion is 7.0 x 6.0 mm, slightly elevated, with a central crater and a reddish-pink color. It's been growing but hasn't changed in appearance. She has a history of other cancers but no skin cancer. The symptoms are itching and bleeding. The image displays displays it's consistent with a basal cell carcinoma (BCC) because of the size, location, and symptoms. The differential diagnosis includes squamous cell carcinoma (SCC), but since there's no change in appearance, BCC is more likely. The final diagnosis should be BCC. </think><answer> Final Answer:BCC </answer>

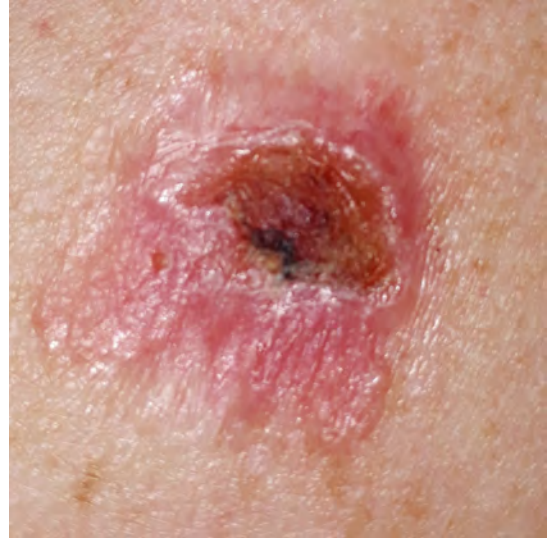

Case495: BCC

**SkinGPT-R1 Response:**

<think> Okay, let's see. The patient is a 32-year-old female with a skin lesion on the back. The lesion is 13x12 mm, slightly raised, reddish, with a central depression and some crust or scaling. There's itching and bleeding, but no pain. The Fitzpatrick skin type is 2.0, which is fair skin. The image displays displays it's consistent with a basal cell carcinoma (BCC) because of the appearance and location. The metadata also notes no personal history of skin cancer, but there's pesticide exposure. BCCs are common in fair-skinned individuals, often on sun-exposed areas like the face, but the back here. The symptoms of itching and bleeding fit with BCC, which can sometimes ulcerate. The central depression and crust are typical of BCC. The differential diagnosis might include other carcinomas like squamous cell carcinoma (SCC), but SCC is more common on sun-exposed areas and might have a different appearance. However, the location is the back, which is more typical for BCC. Also, the presence of pesticide exposure might be a risk factor for certain cancers, but without more info, the key here is the clinical features pointing to BCC. The biopsy was performed, but the image already suggests BCC. So the final diagnosis should be BCC. </think><answer> Final Answer:BCC </answer>

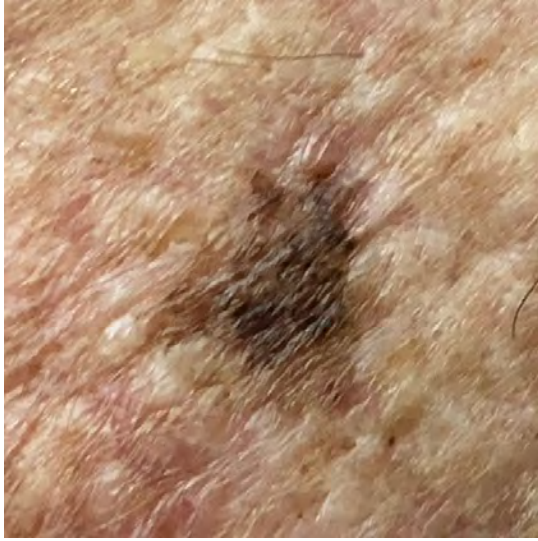

Case496: MEL

**SkinGPT-R1 Response:**

<think> Okay, let's see. The patient is a 73-year-old male with Fitzpatrick skin type 2, which is fair skin. The lesion is on the chest, diameter around 15mm. The image shows displays it's a raised, irregularly shaped lesion with a hyperpigmented center and surrounding atrophy. They mentioned asymmetry and irregular borders, which are key for melanoma. Also, the patient has a history of skin cancer. The symptoms are none, but the lesion has changed over time. Biopsy was performed. Melanoma is a possibility here. The differential diagnosis might include basal cell carcinoma (BCC) or squamous cell carcinoma (SCC), but given the location on the chest and the features of asymmetry and irregular borders, melanoma is more likely. Since the biopsy was done, and the features point to melanoma, the final diagnosis should be melanoma. </think><answer> Final Answer:MEL </answer>

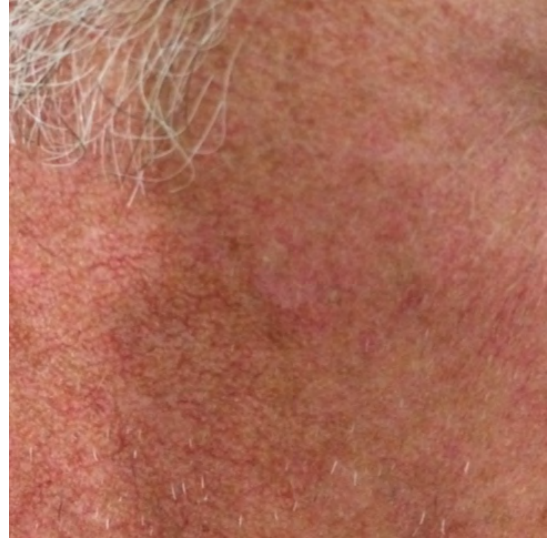

Case497: ACK

**SkinGPT-R1 Response:**

<think> Okay, let's see. The patient is a 39-year-old with a facial lesion. The image shows a red, slightly raised area with some scaling. No symptoms like itching or pain. The lesion is new, neither growing nor changing. Fitzpatrick skin type isn't mentioned, but the image displays it's consistent with actinic keratosis. Actinic keratosis (AK) is a precancerous lesion, common in sun-exposed areas. The key here is the facial location and the appearance. The differential diagnosis might include basal cell carcinoma (BCC) or squamous cell carcinoma (SCC), but since it's new and not showing aggressive features, and the image displays displays actinic keratosis as a possibility, that's a strong clue. The fact that a biopsy wasn't done might be because the clinician considered it low risk. So the primary diagnosis is likely actinic keratosis. The final label should be ACK. </think><answer> Final Answer:ACK </answer>

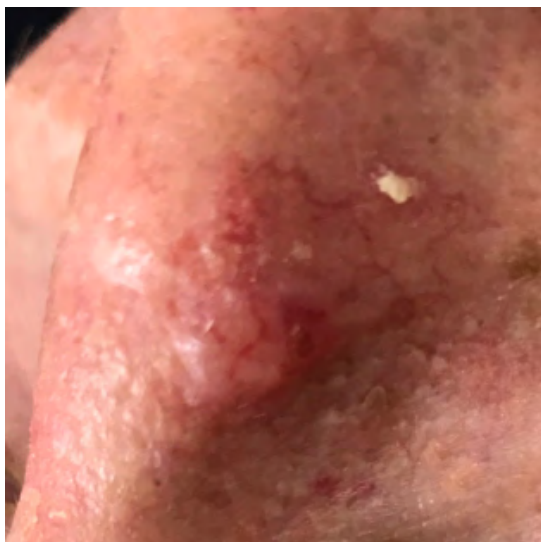

Case498: BCC

**SkinGPT-R1 Response:**

<think> Okay, let's see. The patient is a 84-year-old male with a lesion on the nose. The lesion is 7.0 mm in diameter, elevated, itches, and he has a history of skin cancer. Fitzpatrick skin type 2.0, so fair skin. The image shows a raised, reddish lesion with scaling and crusting. Biopsy was performed. Differential diagnosis needs to be considered. First, the key points: age, location, symptoms, history. The lesion is on the nose, which is a common site for basal cell carcinoma (BCC) or squamous cell carcinoma (SCC). The patient has a history of skin cancer, so recurrence is a possibility. The lesion is elevated and itches. BCC can be nodular or superficial, often with ulceration and crusts. SCC might be more keratotic or have a thicker crust. The presence of itching could be a clue for BCC, as it can be associated with chronic ulceration. The diameter is 7 mm. BCC can be larger, but so can SCC. The image displays displays scaling and crusting, which both BCC and SCC can have. However, the fact that it's on the nose, a site where actinic keratoses (AK) or seborrheic keratoses (SK) are common, but those are usually not raised with the same inflammatory features. The patient's history of skin cancer makes a recurrence more likely. The biopsy was performed, but the image doesn't mention the histology, so we have to rely on clinical features. The differential diagnosis would include BCC, SCC, AK, SK, or maybe a melanoma. But the patient's age and the location (nose) make melanoma less likely, especially since melanoma is more common on sun-exposed areas but can occur anywhere. However, the lesion is raised and itches, which are not typical for melanoma. The presence of a history of skin cancer makes a recurrence of BCC or SCC more probable. Given the age and the location, BCC is a common recurrence site. The symptoms of itching and the appearance of the lesion (elevated, reddish, scaling, crusting) are more consistent with BCC. SCC can also present similarly but might have a different histological pattern. However, without histology, it's challenging. But since the biopsy was performed, the final diagnosis would be based on that. But the question is to provide the primary diagnosis based on the image and metadata. The key here is that the patient has a history of skin cancer, so a recurrence is a strong possibility. The lesion is on the nose, which is a common site for BCC. The symptoms of itching and the clinical appearance point towards BCC. Therefore, the primary diagnosis is likely BCC. The differential diagnosis would include SCC, but given the history, BCC is more likely. The final label would be BCC. </think><answer> Final Answer:BCC </answer>

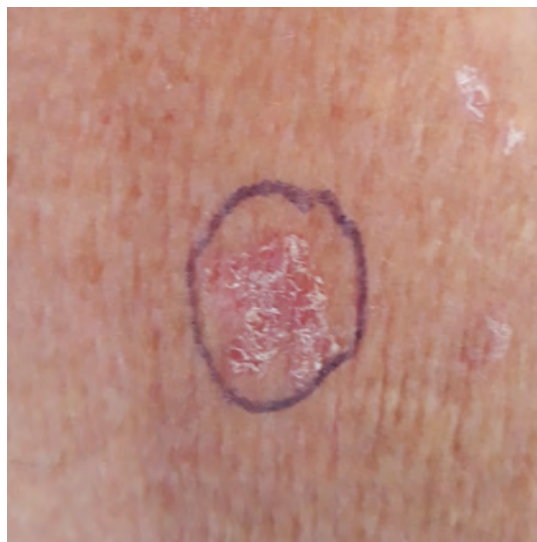

Case499: ACK

**SkinGPT-R1 Response:**

<think> Okay, let's see. The patient is a 66-year-old with a skin lesion on the arm. The image shows a raised, slightly scaly lesion with a slightly elevated center. It's been there a while but hasn't changed in size or shape. The patient has a history of skin cancer, so they're at higher risk. The key points here are the scaly appearance, raised center, and the fact that it's been stable. The image displays displays it's consistent with actinic keratosis. Actinic keratosis (AK) is a precancerous lesion, common in sun-exposed areas like the arm. The scaly texture and slight elevation fit AK. Since the patient has a history of skin cancer, AK is a plausible diagnosis. The differential diagnosis might include seborrheic keratosis (SEK) or basal cell carcinoma (BCC), but the image doesn't mention a palpebral or mucosal location for BCC, and SEK usually has a different texture. Malignant melanoma (MEL) is less likely because there's no mention of pigmentation or irregular borders. So the primary diagnosis is actinic keratosis. </think><answer> Final Answer:ACK </answer>

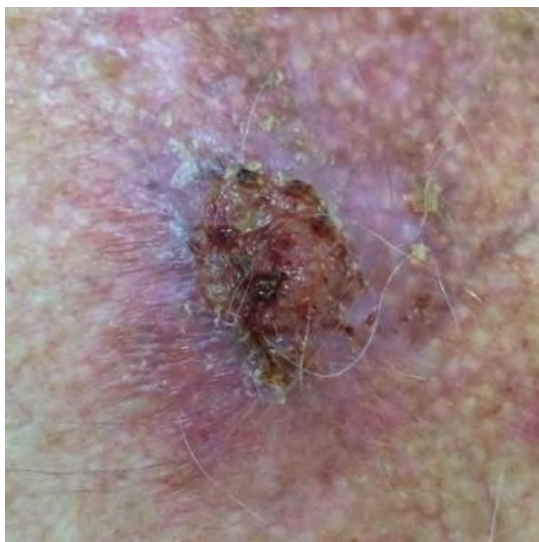

Case500: SCC

**SkinGPT-R1 Response:**

<think> Okay, let's see. The patient is a 70-year-old male with a chest lesion. The image shows a raised, irregularly shaped lesion with a crusty surface. The metadata displays it's been growing but not changing in other ways. The patient has a history of alcohol use but no smoking. The lesion is on the chest, which is a common site for certain cancers. The key points here are the appearance: raised, crusty, possibly scaly. The image displays displays it's consistent with a keratinizing squamous cell carcinoma (SCC). The differential diagnosis might include basal cell carcinoma (BCC), but BCC is usually more waxy and less likely to be crusty. Actinic keratosis (AK) is a pre-cancerous lesion, but it's typically smaller and might not be as raised. Seborrheic keratosis (SEK) is usually smoother and not as aggressive. Melanoma (MEL) would have different features like irregular borders or pigment, but the image doesn't mention those. Since the lesion is keratinizing and on the chest, SCC is a strong possibility. The fact that it's been growing without changing supports a cancerous lesion. The absence of other symptoms like bleeding or pain also aligns with SCC. The biopsy being performed would confirm the diagnosis. So the primary diagnosis is likely SCC. </think><answer> Final Answer:SCC </answer>

- [5] A. G. Pacheco, G. R. Lima, A. S. Salomao, B. Krohling, I. P. Biral, G. G. de Angelo, F. C. Alves Jr, J. G. Esgario, A. C. Simora, P. B. Castro *et al.*, "Pad-ufes-20: A skin lesion dataset composed of patient data and clinical images collected from smartphones," *Data in brief*, vol. 32, p. 106221, 2020.
- [6] J. Kawahara, S. Daneshvar, G. Argenziano, and G. Hamarneh, "Seven-point checklist and skin lesion classification using multi-task multimodal neural nets," *IEEE journal of biomedical and health informatics*, vol. 23, no. 2, pp. 538–546, 2018.
- [7] M. Groh, C. Harris, L. Soenksen, F. Lau, R. Han, A. Kim, A. Koochek, and O. Badri, "Evaluating deep neural networks trained on clinical images in dermatology with the fitzpatrick 17k dataset," in *Proceedings of the IEEE/CVF conference on computer vision and pattern recognition*, 2021, pp. 1820–1828.
- [8] M. Groh, C. Harris, R. Daneshjou, O. Badri, and A. Koochek, "Towards transparency in dermatology image datasets with skin tone annotations by experts, crowds, and an algorithm," *Proceedings of the ACM on Human-Computer Interaction*, vol. 6, no. CSCW2, pp. 1–26, 2022.
- [9] R. Daneshjou, K. Vodrahalli, R. A. Novoa, M. Jenkins, W. Liang, V. Rotemberg, J. Ko, S. M. Swetter, E. E. Bailey, O. Gevaert *et al.*, "Disparities in dermatology ai performance on a diverse, curated clinical image set," *Science advances*, vol. 8, no. 31, p. eabq6147, 2022.
- [10] A. Yilmaz, S. P. Yasar, G. Gencoglan, and B. Temelkuran, "Derm12345: A large, multisource dermatoscopic skin lesion dataset with 40 subclasses," *Scientific Data*, vol. 11, no. 1, p. 1302, 2024.

**REFERENCES**

- [1] S. Yan, M. Hu, Y. Jiang, X. Li, H. Fei, P. Tschandl, H. Kittler, and Z. Ge, "Derm1m: A million-scale vision-language dataset aligned with clinical ontology knowledge for dermatology," *arXiv preprint arXiv:2503.14911*, 2025.
- [2] Dermnet. (2020) Dermnet. [Online]. Available: <https://dermnetnz.org/>
- [3] R. Daneshjou, M. Yuksekgonul, Z. R. Cai, R. Novoa, and J. Y. Zou, "Skincon: A skin disease dataset densely annotated by domain experts for fine-grained debugging and analysis," *Advances in Neural Information Processing Systems*, vol. 35, pp. 18 157–18 167, 2022.
- [4] S. N. Ali, M. T. Ahmed, T. Jahan, J. Paul, S. M. S. Sani, N. Noor, A. N. Asma, and T. Hasan, "A web-based mpox skin lesion detection system using state-of-the-art deep learning models considering racial diversity," *Biomedical Signal Processing and Control*, vol. 98, p. 106742, 2024.
